# Supplementary material for: Synthesis of (Z)-alkenyl boronates via a copper(i)-catalyzed linear-selective alkylboration of terminal allenes
Source: Royal Society of Chemistry journal article supplement (doi:10.1039/d3qo01095c), 2023-01-01
Supplement: d3qo01095c2.pdf [file d3qo01095c2.pdf]

## Synthesis of (Z)-alkenyl boronates via a copper(I)-catalyzed linear-selective alkylboration of terminal allenes

Yu Ozawa,<sup>[a]</sup> Yuma Shiratori,<sup>[a]</sup> Hisao Koriyama,<sup>[a]</sup> Kohei Endo,<sup>[a]</sup> Hiroaki Iwamoto,<sup>[a]</sup> and Hajime Ito<sup>[a,b]\*</sup>

[a] *Division of Applied Chemistry, Graduate School of Engineering, Hokkaido University, Sapporo, Hokkaido 060-8628, Japan.*

[b] *Institute for Chemical Reaction Design and Discovery (WPI-ICReDD), Hokkaido University, Sapporo, Hokkaido 060-8628, Japan.*

*e-mail: hajito@eng.hokudai.ac.jp*

### Table of Contents

|                                                                  |         |
|------------------------------------------------------------------|---------|
| 1. Instrumentation and Chemicals                                 | S2      |
| 2. Substrate Preparation and Characterization                    | S3      |
| 3. General Borylation Procedure                                  | S4      |
| 4. Borylation Product Characterization                           | S5–S14  |
| 5. Comparison Experiments                                        | S15     |
| 6. Suzuki–Miyaura Cross-coupling Reaction of Borylation Products | S16–S18 |
| 7. Formal Total Synthesis of schizol A                           | S19–S22 |
| 8. Computational Study                                           | S23     |
| 9. References                                                    | S24–S26 |
| 10. NMR Spectra                                                  | S27–S92 |

## 1. Instrumentation and Chemicals

Materials were obtained from commercial suppliers and purified by standard procedures unless otherwise noted. Solvents were also purchased from commercial suppliers, degassed via three freeze-pump-thaw cycles, and further dried over molecular sieves (MS 4A). NMR spectra were recorded on JEOL JNM-ECX400P, JNM-ECS400 and JNM-ECA600 spectrometers ( $^1\text{H}$ : 400 MHz,  $^{13}\text{C}$ : 100 MHz). Tetramethylsilane ( $^1\text{H}$ ,  $\delta$  0.00) and  $\text{CDCl}_3$  ( $^{13}\text{C}$ ,  $\delta$  77.0) were employed as the external standards, respectively.  $\text{CuCl}$  (224332-25G,  $\geq 99\%$ ) and  $\text{K}(\text{O}-t\text{-Bu})$  (659878-5G, 99.99%) were purchased from Sigma-Aldrich Co. and used as received. GLC analyses were conducted with a Shimadzu GC-2014 or GC-2025 equipped with a ULBON HR-1 glass capillary column (Shinwa Chemical Industries) and an FID detector. Recycle preparative gel chromatography (GPC) was conducted with JAILC-9101 using  $\text{CHCl}_3$  as an eluent. High-resolution mass spectra were recorded at the Global Facility Center, Hokkaido University and GC-MS & NMR Lab., Faculty of Agriculture, Hokkaido University.

## 2. Substrate Preparation and Characterization

Terminal allenes (**1a–1j**,<sup>1</sup> **1k**,<sup>2</sup> **1l**,<sup>3</sup> **1m**,<sup>4</sup> **1n**<sup>5</sup> and **1o**<sup>6</sup>), an internal alkyne (**7**<sup>7</sup>), and an internal allene (**9**<sup>8</sup>) were prepared according to literature procedures. The <sup>1</sup>H and <sup>13</sup>C NMR spectra of known compounds were confirmed with literatures (**1a**,<sup>9</sup> **1b**,<sup>10</sup> **1c**,<sup>11</sup> **1d**,<sup>11</sup> **1e**,<sup>12</sup> **1f**,<sup>13</sup> **1g**,<sup>14</sup> **1h**,<sup>9</sup> **1i**,<sup>15</sup> **1j**,<sup>16</sup> **1k**,<sup>2</sup> **1l**,<sup>3</sup> **1m**,<sup>4</sup> **1n**,<sup>5</sup> **1o**,<sup>6</sup> and **7**<sup>17</sup>). All alkyl iodides (**2a–2h**) were purchased from commercial suppliers (Tokyo Chemical Industry Co. and Sigma-Aldrich Co.).

### 1-Phenyl-3,4-decadiene (**9**)

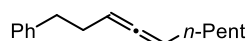

The internal allene **9** was synthesized according to literature procedure.<sup>8</sup> The product **9** was obtained in 88% yield (521 mg, 2.43 mmol, colorless oil).

<sup>1</sup>H NMR (392 MHz, CDCl<sub>3</sub>, δ): 0.89 (t, *J* = 6.7 Hz, 3H), 1.22–1.42 (m, 6H), 1.88–1.99 (m, 2H), 2.26–2.35 (m, 2H), 2.72 (t, *J* = 7.6 Hz, 2H), 5.04–5.16 (m, 2H), 7.14–7.33 (m, 5H). <sup>13</sup>C NMR (98 MHz, CDCl<sub>3</sub>, δ): 14.1 (CH<sub>3</sub>), 22.5 (CH<sub>2</sub>), 28.8 (CH<sub>2</sub>), 30.7 (CH<sub>2</sub>), 31.3 (CH<sub>2</sub>), 35.5 (CH<sub>2</sub>), 90.2 (CH), 91.5 (CH), 125.7 (CH), 128.2 (CH), 128.5 (CH), 141.9 (C), 203.9 (C). HRMS-EI (*m/z*): [M]<sup>+</sup> calcd for C<sub>16</sub>H<sub>22</sub>, 214.1722; found, 214.1720.

### 3. General Borylation Procedure

IMesCuCl was prepared according to the literature.<sup>18</sup> In an argon-filled glove-box, IMesCuCl (4.1 mg, 0.010 mmol), bis(pinacolato)diboron (**3**) (152.4 mg, 0.60 mmol), and K(O-*t*-Bu) (67.3 mg, 0.60 mmol) were placed in an oven-dried reaction vial. After the vial was sealed with a screw cap containing a Teflon<sup>TM</sup>-coated rubber septum, dry DMF (1.0 mL) was added in the vial through the rubber septum using a syringe. After stirred for 15 min, the reaction mixture was cooled to 0 °C. After stirred at 0 °C for 10 min, **1a** (0.50 mmol) and **2a** (1.0 mmol) were added to the mixture. The reaction mixture was stirred at 0 °C for 24 h. After the reaction was completed, the reaction mixture was passed through a short silica gel column ( $\Phi$ : 10 mm, height of the silica-gel column: 90 mm) eluting with Et<sub>2</sub>O/hexane (10/90). The crude material was purified by flash column chromatography (SiO<sub>2</sub>, Et<sub>2</sub>O/hexane, 0:100–20:80) to give the corresponding alkenyl boronate (*Z*)-**4aa** as a colorless oil. Then, the regioselectivity and stereoselectivity were determined by <sup>1</sup>H NMR analysis and <sup>13</sup>C NMR analysis.

#### 4. Borylation Product Characterization

##### (Z)-4,4,5,5-Tetramethyl-2-(1-phenyldec-3-en-4-yl)-1,3,2-dioxaborolane [(Z)-4aa].

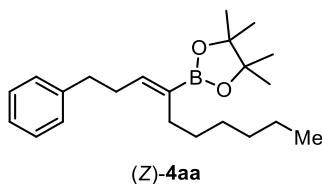

The borylation reaction was conducted with 72.1 mg (0.500 mmol) of **1a**. The product (Z)-**4aa** was obtained in 90% yield with  $E/Z = 1:99$ ,  $4:5 = >99:1$  (154.0 mg, 0.450 mmol, colorless oil).

$^1\text{H}$  NMR (392 MHz,  $\text{CDCl}_3$ ,  $\delta$ ): 0.87 (t,  $J = 7.0$  Hz, 3H), 1.17–1.34 (m, 8H), 1.26 (s, 12H), 2.06–2.14 (m, 2H), 2.40–2.47 (m, 2H), 2.66–2.73 (m, 2H), 6.35 (t,  $J = 7.0$  Hz, 1H), 7.15–7.22 (m, 3H), 7.24–7.32 (m, 2H).  $^{13}\text{C}$  NMR (99 MHz,  $\text{CDCl}_3$ ,  $\delta$ ): 14.1 ( $\text{CH}_3$ ), 22.6 ( $\text{CH}_2$ ), 24.7 ( $\text{CH}_3$ ), 28.5 ( $\text{CH}_2$ ), 29.2 ( $\text{CH}_2$ ), 30.0 ( $\text{CH}_2$ ), 30.7 ( $\text{CH}_2$ ), 31.8 ( $\text{CH}_2$ ), 35.6 ( $\text{CH}_2$ ), 83.0 (C), 125.8 ( $\text{CH}_2$ ), 128.3 (CH), 133.1 (br, B–C), 142.2 (C), 144.4 (CH). HRMS-EI ( $m/z$ ):  $[\text{M}]^+$  calcd for  $\text{C}_{22}\text{H}_{35}\text{O}_2^{11}\text{B}$ , 342.2734; found, 342.2726.

##### (Z)-4,4,5,5-Tetramethyl-2-(pentadec-7-en-7-yl)-1,3,2-dioxaborolane [(Z)-4ba].

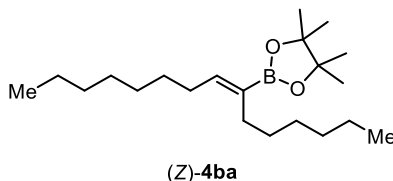

The borylation reaction was conducted with 68.9 mg (0.498 mmol) of **1b**. The product (Z)-**4ba** was obtained in 54% yield with  $E/Z = <5:95$ ,  $4:5 = >95:5$  (96.4 mg, 0.269 mmol, colorless oil).

$^1\text{H}$  NMR (400 MHz,  $\text{CDCl}_3$ ,  $\delta$ ): 0.88 (t,  $J = 6.7$  Hz, 6H), 1.21–1.34 (m, 18H), 1.25 (s, 12H), 2.08–2.14 (m, 4H), 6.27 (t,  $J = 6.7$  Hz, 1H).  $^{13}\text{C}$  NMR (99 MHz,  $\text{CDCl}_3$ ,  $\delta$ ): 14.1 ( $\text{CH}_3$ ), 22.7 ( $\text{CH}_2$ ), 24.7 ( $\text{CH}_3$ ), 24.8 ( $\text{CH}_2$ ), 28.49 ( $\text{CH}_2$ ), 28.53 ( $\text{CH}_2$ ), 29.2 ( $\text{CH}_2$ ), 29.5 ( $\text{CH}_2$ ), 30.2 ( $\text{CH}_2$ ), 31.8 ( $\text{CH}_2$ ), 31.9 ( $\text{CH}_2$ ), 82.9 (C), 146.0 (CH). HRMS-EI ( $m/z$ ):  $[\text{M}]^+$  calcd for  $\text{C}_{21}\text{H}_{41}\text{O}_2^{11}\text{B}$ , 336.3203; found, 336.3199.

##### (Z)-5-(4,4,5,5-Tetramethyl-1,3,2-dioxaborolan-2-yl)undec-4-en-1-yl pivalate [(Z)-4ca].

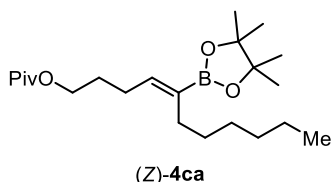

The borylation reaction was conducted with 91.1 mg (0.500 mmol) of **1c**. The product (Z)-**4ca** was obtained in 52% yield with  $E/Z = <5:95$ ,  $4:5 = >95:5$  (99.5 mg, 0.260 mmol, colorless oil).

$^1\text{H}$  NMR (392 MHz,  $\text{CDCl}_3$ ,  $\delta$ ): 0.87 (t,  $J = 6.7$  Hz, 3H), 1.20 (s, 9H), 1.22–1.33 (m, 8H), 1.25 (s,

12H), 1.73 (quintet,  $J = 7.0$  Hz, 2H), 2.11 (t,  $J = 6.8$  Hz, 2H), 2.21 (q,  $J = 7.0$  Hz, 2H), 4.06 (t,  $J = 6.7$  Hz, 2H), 6.25 (t,  $J = 7.0$  Hz, 1H).  $^{13}\text{C}$  NMR (99 MHz,  $\text{CDCl}_3$ ,  $\delta$ ): 14.1 ( $\text{CH}_3$ ), 22.6 ( $\text{CH}_2$ ), 24.7 ( $\text{CH}_3$ ), 24.9 ( $\text{CH}_2$ ), 27.2 ( $\text{CH}_3$ ), 28.2 ( $\text{CH}_2$ ), 28.5 ( $\text{CH}_2$ ), 29.3 ( $\text{CH}_2$ ), 30.1 ( $\text{CH}_2$ ), 31.8 ( $\text{CH}_2$ ), 38.7 (C), 64.0 ( $\text{CH}_2$ ), 83.0 (C), 144.0 (CH), 178.6 (C). HRMS-ESI ( $m/z$ ):  $[\text{M}+\text{Na}]^+$  calcd for  $\text{C}_{22}\text{H}_{41}\text{O}_4^{11}\text{BNa}$ , 403.2994; found, 403.2993.

**(Z)-tert-Butyldimethyl{[5-(4,4,5,5-tetramethyl-1,3,2-dioxaborolan-2-yl)undec-4-en-1-yl]oxy}silane [(Z)-4da].**

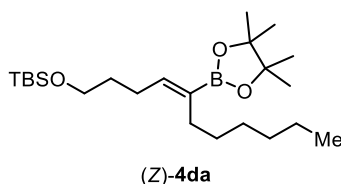

The borylation reaction was conducted with 106.1 mg (0.500 mmol) of **1d**. The product **(Z)-4da** was obtained in 86% yield with  $E/Z = <5:95$ ,  $4:5 = >95:5$  (177.0 mg, 0.431 mmol, colorless oil).

$^1\text{H}$  NMR (392 MHz,  $\text{CDCl}_3$ ,  $\delta$ ): 0.04 (s, 6H), 0.85–0.91 (m, 3H), 0.89 (s, 9H), 1.21–1.33 (m, 8H), 1.25 (s, 12H), 1.60 (quintet,  $J = 6.7$  Hz, 2H), 2.10–2.21 (m, 4H), 3.61 (t,  $J = 6.7$  Hz, 2H), 6.28 (t,  $J = 7.0$  Hz, 1H).  $^{13}\text{C}$  NMR (100 MHz,  $\text{CDCl}_3$ ,  $\delta$ ): -5.3 ( $\text{CH}_3$ ), 14.1 ( $\text{CH}_3$ ), 18.3 (C), 22.7 ( $\text{CH}_2$ ), 24.7 ( $\text{CH}_3$ ), 24.9 ( $\text{CH}_2$ ), 25.9 ( $\text{CH}_3$ ), 28.4 ( $\text{CH}_2$ ), 29.2 ( $\text{CH}_2$ ), 30.1 ( $\text{CH}_2$ ), 31.9 ( $\text{CH}_2$ ), 32.4 ( $\text{CH}_2$ ), 62.8 ( $\text{CH}_2$ ), 82.9 (C), 145.2 (CH). HRMS-EI ( $m/z$ ):  $[\text{M}-\text{Me}]^+$  calcd for  $\text{C}_{22}\text{H}_{44}\text{O}_3\text{Si}^{11}\text{B}$ , 395.3157; found, 395.3153.

**(Z)-2-[1-(Benzyloxy)undec-4-en-5-yl]-4,4,5,5-tetramethyl-1,3,2-dioxaborolane [(Z)-4ea].**

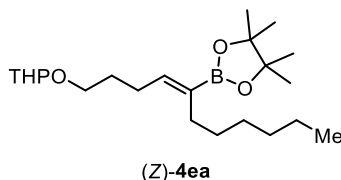

The borylation reaction was conducted with 91.4 mg (0.501 mmol) of **1e**. The product **(Z)-4ea** was obtained in 84% yield with  $E/Z = <5:95$ ,  $4:5 = >95:5$  (159.5 mg, 0.421 mmol, colorless oil).

$^1\text{H}$  NMR (392 MHz,  $\text{CDCl}_3$ ,  $\delta$ ): 0.87 (t,  $J = 6.7$  Hz, 3H), 1.20–1.34 (m, 8H), 1.25 (s, 12H), 1.47–1.62 (m, 4H), 1.66–1.74 (m, 3H), 1.78–1.88 (m, 1H), 2.12 (t,  $J = 6.7$  Hz, 2H), 2.16–2.28 (m, 2H), 3.40 (dt,  $J = 12.9$  and 6.7 Hz, 1H), 3.47–3.52 (m, 1H), 3.74 (dt,  $J = 12.9$  and 6.7 Hz, 1H), 3.84–3.90 (m, 1H), 4.57–4.59 (m, 1H), 6.28 (t,  $J = 6.7$  Hz, 1H).  $^{13}\text{C}$  NMR (99 MHz,  $\text{CDCl}_3$ ,  $\delta$ ): 14.1 ( $\text{CH}_3$ ), 19.6 ( $\text{CH}_2$ ), 22.7 ( $\text{CH}_2$ ), 24.7 ( $\text{CH}_3$ ), 25.2 ( $\text{CH}_2$ ), 25.5 ( $\text{CH}_2$ ), 28.5 ( $\text{CH}_2$ ), 29.22 ( $\text{CH}_2$ ), 29.25 ( $\text{CH}_2$ ), 30.1 ( $\text{CH}_2$ ), 30.7 ( $\text{CH}_2$ ), 31.9 ( $\text{CH}_2$ ), 62.2 ( $\text{CH}_2$ ), 67.1 ( $\text{CH}_2$ ), 82.9 (C), 98.7 (CH), 144.9 (CH). HRMS-ESI ( $m/z$ ):  $[\text{M}+\text{Na}]^+$  calcd for  $\text{C}_{22}\text{H}_{41}\text{O}_4^{11}\text{BNa}$ , 403.2994; found, 403.2993.

**(Z)-2-[1-(Benzyloxy)undec-4-en-5-yl]-4,4,5,5-tetramethyl-1,3,2-dioxaborolane [(Z)-4fa].**

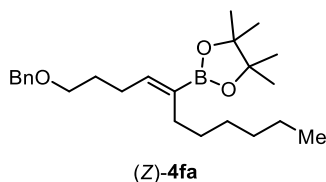

The borylation reaction was conducted with 94.2 mg (0.500 mmol) of **1f**. The product (**Z**)-**4fa** was obtained in 70% yield with  $E/Z = <5:95$ ,  $4:5 = >95:5$  (135.3 mg, 0.350 mmol, colorless oil).

$^1\text{H}$  NMR (392 MHz,  $\text{CDCl}_3$ ,  $\delta$ ): 0.87 (t,  $J = 7.0$  Hz, 3H), 1.20–1.34 (m, 8H), 1.25 (s, 12H), 1.72 (quintet,  $J = 7.0$  Hz, 2H), 2.12 (t,  $J = 6.8$  Hz, 2H), 2.22 (q,  $J = 7.0$  Hz, 2H), 3.48 (t,  $J = 6.7$  Hz, 2H), 4.50 (s, 2H), 6.26 (t,  $J = 7.0$  Hz, 1H), 7.26–7.34 (m, 5H).  $^{13}\text{C}$  NMR (100 MHz,  $\text{CDCl}_3$ ,  $\delta$ ): 14.1 ( $\text{CH}_3$ ), 22.6 ( $\text{CH}_2$ ), 24.7 ( $\text{CH}_3$ ), 25.1 ( $\text{CH}_2$ ), 28.5 ( $\text{CH}_2$ ), 29.16 ( $\text{CH}_2$ ), 29.24 ( $\text{CH}_2$ ), 30.1 ( $\text{CH}_2$ ), 31.9 ( $\text{CH}_2$ ), 70.0 ( $\text{CH}_2$ ), 72.8 ( $\text{CH}_2$ ), 83.0 (C), 127.4 (CH), 127.6 (CH), 128.3 (CH), 138.6 (C), 144.8 (CH). HRMS-EI ( $m/z$ ):  $[\text{M}-\text{Me}]^+$  calcd for  $\text{C}_{23}\text{H}_{36}\text{O}_3^{11}\text{B}$ , 371.2762; found, 371.2758.

**(Z)-2-(1-Chlorododec-5-en-6-yl)-4,4,5,5-tetramethyl-1,3,2-dioxaborolane [(Z)-4ga].**

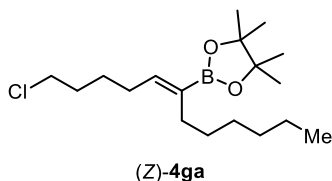

The borylation reaction was conducted with 65.9 mg (0.504 mmol) of **1g**. The product (**Z**)-**4ga** was obtained in 91% yield with  $E/Z = <5:95$ ,  $4:5 = >95:5$  (150.4 mg, 0.458 mmol, colorless oil).

$^1\text{H}$  NMR (392 MHz,  $\text{CDCl}_3$ ,  $\delta$ ): 0.88 (t,  $J = 6.7$  Hz, 3H), 1.23–1.33 (m, 8H), 1.25 (s, 12H), 1.50–1.58 (m, 2H), 1.76–1.83 (m, 2H), 2.09–2.19 (m, 4H), 3.53 (t,  $J = 6.7$  Hz, 2H), 6.24 (t,  $J = 6.7$  Hz, 1H).  $^{13}\text{C}$  NMR (100 MHz,  $\text{CDCl}_3$ ,  $\delta$ ): 14.1 ( $\text{CH}_3$ ), 22.6 ( $\text{CH}_2$ ), 24.7 ( $\text{CH}_3$ ), 26.4 ( $\text{CH}_2$ ), 27.6 ( $\text{CH}_2$ ), 28.5 ( $\text{CH}_2$ ), 29.2 ( $\text{CH}_2$ ), 30.1 ( $\text{CH}_2$ ), 31.9 ( $\text{CH}_2$ ), 32.3 ( $\text{CH}_2$ ), 45.0 ( $\text{CH}_2$ ), 83.0 (C), 144.6 (CH). HRMS-EI ( $m/z$ ):  $[\text{M}]^+$  calcd for  $\text{C}_{18}\text{H}_{34}\text{O}_2\text{Cl}^{11}\text{B}$ , 328.2344; found, 328.2349.

**(Z)-4,4,5,5-Tetramethyl-2-(6-phenylhex-3-en-3-yl)-1,3,2-dioxaborolane [(Z)-4ab].**

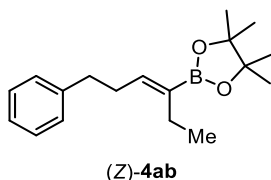

The borylation reaction was conducted with 71.8 mg (0.498 mmol) of **1a**. The product (**Z**)-**4ab** was obtained in 70% yield with  $E/Z = <5:95$ ,  $4:5 = >95:5$  (100.4 mg, 0.349 mmol, colorless oil).

$^1\text{H}$  NMR (392 MHz,  $\text{CDCl}_3$ ,  $\delta$ ): 0.91 (t,  $J = 7.4$  Hz, 3H), 1.27 (s, 12H), 2.12 (q,  $J = 7.4$  Hz, 2H), 2.42–2.48 (m, 2H), 2.68–2.72 (m, 2H), 6.34 (t,  $J = 7.0$  Hz, 1H), 7.16–7.22 (m, 3H), 7.25–7.31 (m, 2H).  $^{13}\text{C}$  NMR (99 MHz,  $\text{CDCl}_3$ ,  $\delta$ ): 14.7 ( $\text{CH}_3$ ), 21.8 ( $\text{CH}_2$ ), 24.7 ( $\text{CH}_3$ ), 30.4 ( $\text{CH}_2$ ), 35.6 ( $\text{CH}_2$ ), 83.0 (C),

125.8 (CH), 128.3 (CH), 142.1 (C), 144.0 (CH). HRMS-EI ( $m/z$ ):  $[M]^+$  calcd for  $C_{18}H_{27}O_2^{11}B$ , 286.2107; found, 286.2102.

**(Z)-4,4,5,5-Tetramethyl-2-(1-phenylpentadec-3-en-4-yl)-1,3,2-dioxaborolane [(Z)-4ac].**

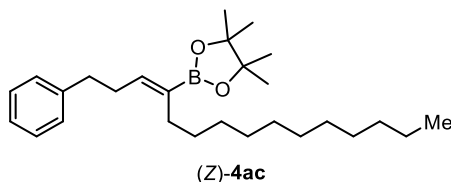

The borylation reaction was conducted with 72.1 mg (0.500 mmol) of **1a**. The product **(Z)-4ac** was obtained in 85% yield with  $E/Z = <5:95$ , **4:5** =  $>95:5$  (174.9 mg, 0.424 mmol, colorless oil).

$^1H$  NMR (392 MHz,  $CDCl_3$ ,  $\delta$ ): 0.88 (t,  $J = 6.9$  Hz, 3H), 1.17–1.35 (m, 18H), 1.26 (s, 12H), 2.06–2.15 (m, 2H), 2.39–2.48 (m, 2H), 2.65–2.73 (m, 2H), 6.35 (t,  $J = 6.9$  Hz, 1H), 7.15–7.22 (m, 3H), 7.25–7.32 (m, 2H).  $^{13}C$  NMR (99 MHz,  $CDCl_3$ ,  $\delta$ ): 14.1 ( $CH_3$ ), 22.7 ( $CH_2$ ), 24.7 ( $CH_3$ ), 28.5 ( $CH_2$ ), 29.3 ( $CH_2$ ), 29.5 ( $CH_2$ ), 29.6 ( $CH_2$ ), 29.7 ( $CH_2$ ), 30.1 ( $CH_2$ ), 30.7 ( $CH_2$ ), 31.9 ( $CH_2$ ), 35.6 ( $CH_2$ ), 82.9 (C), 125.7 (CH), 128.3 (CH), 133.2 (br, B–C), 142.2 (C), 144.4 (CH). HRMS-EI ( $m/z$ ):  $[M]^+$  calcd for  $C_{27}H_{45}O_2^{11}B$ , 412.3517; found, 412.3511.

**(Z)-4,4,5,5-Tetramethyl-2-(7-methyl-1-phenyloct-3-en-4-yl)-1,3,2-dioxaborolane [(Z)-4ad].**

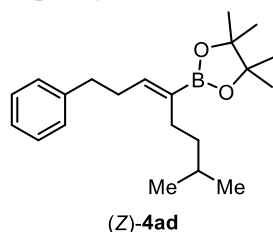

The borylation reaction was conducted with 72.1 mg (0.500 mmol) of **1a**. The product **(Z)-4ad** was obtained in 79% yield with  $E/Z = <5:95$ , **4:5** =  $94:6$  (129.6 mg, 0.395 mmol, colorless oil).

$^1H$  NMR (400 MHz,  $CDCl_3$ ,  $\delta$ ): 0.87 (d,  $J = 6.8$  Hz, 6H), 1.12–1.20 (m, 2H), 1.26 (s, 12H), 1.45–1.56 (m, 1H), 2.04–2.17 (m, 2H), 2.38–2.49 (m, 2H), 2.63–2.76 (m, 2H), 6.33 (t,  $J = 7.2$  Hz, 1H), 7.12–7.23 (m, 3H), 7.23–7.32 (m, 2H).  $^{13}C$  NMR (99 MHz,  $CDCl_3$ ,  $\delta$ ): 22.6 ( $CH_3$ ), 24.7 ( $CH_3$ ), 26.4 ( $CH_2$ ), 27.9 (CH), 30.6 ( $CH_2$ ), 35.6 ( $CH_2$ ), 39.3 ( $CH_2$ ), 82.9 (C), 125.8 (CH), 128.3 (CH), 133.2 (br, B–C), 142.2 (C), 144.1 (CH). HRMS-EI ( $m/z$ ):  $[M]^+$  calcd for  $C_{21}H_{33}O_2^{11}B$ , 328.2577; found, 328.2578.



**(Z)-4,4,5,5-Tetramethyl-2-(9,9,9-trifluoro-1-phenylnon-3-en-4-yl)-1,3,2-dioxaborolane [(Z)-4ae].**

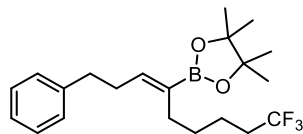

(Z)-4ae

The borylation reaction was conducted with 72.1 mg (0.500 mmol) of **1a**. The product (Z)-**4ae** was obtained in 84% yield with  $E/Z = <5:95$ ,  $4:5 = >95:5$  (158.7 mg, 0.415 mmol, colorless oil).

$^1\text{H NMR}$  (392 MHz,  $\text{CDCl}_3$ ,  $\delta$ ): 1.25 (s, 12H), 1.28–1.37 (m, 2H), 1.45–1.53 (m, 2H), 1.96–2.08 (m, 2H), 2.12 (t,  $J = 7.6$  Hz, 2H), 2.39–2.47 (m, 2H), 2.67–2.74 (m, 2H), 6.40 (t,  $J = 7.0$  Hz, 1H), 7.16–7.22 (m, 3H), 7.24–7.31 (m, 2H).  $^{13}\text{C NMR}$  (99 MHz,  $\text{CDCl}_3$ ,  $\delta$ ): 21.6 (q,  $J = 3.0$  Hz,  $\text{CH}_2$ ), 24.7 ( $\text{CH}_3$ ), 27.9 ( $\text{CH}_2$ ), 29.0 ( $\text{CH}_2$ ), 30.8 ( $\text{CH}_2$ ), 33.7 (q,  $J = 28.3$  Hz,  $\text{CH}_2$ ), 35.5 ( $\text{CH}_2$ ), 83.1 (C), 125.8 (C), 127.4 (q,  $J = 294.6$  Hz, C), 128.3 (C), 132.0 (br, B–C), 142.0 (C), 145.4 (CH). HRMS-EI ( $m/z$ ):  $[\text{M}]^+$  calcd for  $\text{C}_{21}\text{H}_{30}\text{F}_3\text{O}_2^{11}\text{B}$ , 382.2295; found, 382.2288.

**(Z)-2-(8-Chloro-1-phenyloct-3-en-4-yl)-4,4,5,5-tetramethyl-1,3,2-dioxaborolane [(Z)-4af].**

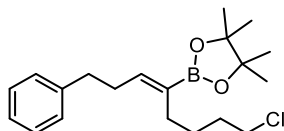

(Z)-4af

The borylation reaction was conducted with 72.2 mg (0.500 mmol) of **1a**. The product (Z)-**4af** was obtained in 85% yield with  $E/Z = <5:95$ ,  $4:5 = >95:5$  (148.8 mg, 0.425 mmol, colorless oil).

$^1\text{H NMR}$  (392 MHz,  $\text{CDCl}_3$ ,  $\delta$ ): 1.26 (s, 12H), 1.42 (quintet,  $J = 7.0$  Hz, 2H), 1.72 (quintet,  $J = 7.0$  Hz, 2H), 2.13 (t,  $J = 7.0$  Hz, 2H), 2.41–2.47 (m, 2H), 2.68–2.72 (m, 2H), 3.51 (t,  $J = 7.0$  Hz, 1H), 6.39 (t,  $J = 7.0$  Hz, 1H), 7.17–7.20 (m, 3H), 7.26–7.30 (m, 2H).  $^{13}\text{C NMR}$  (99 MHz,  $\text{CDCl}_3$ ,  $\delta$ ): 24.7 ( $\text{CH}_3$ ), 27.2 ( $\text{CH}_2$ ), 27.5 ( $\text{CH}_2$ ), 30.8 ( $\text{CH}_2$ ), 32.3 ( $\text{CH}_2$ ), 35.5 ( $\text{CH}_2$ ), 45.1 ( $\text{CH}_2$ ), 83.1 (C), 125.8 (CH), 128.3 (CH), 142.0 (C), 145.3 (CH). HRMS-EI ( $m/z$ ):  $[\text{M}]^+$  calcd for  $\text{C}_{20}\text{H}_{30}\text{O}_2\text{Cl}^{11}\text{B}$ , 348.2031; found, 348.2025.

**(Z)-tert-Butyl{[9-chloro-5-(4,4,5,5-tetramethyl-1,3,2-dioxaborolan-2-yl)non-4-en-1-yl]oxy}dimethylsilane [(Z)-4df].**

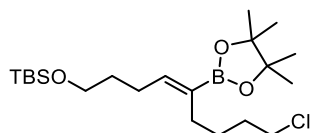

(Z)-4df

The borylation reaction was conducted with 104.4 mg (0.492 mmol) of **1d**. The product (Z)-**4df** was obtained in 60% yield with  $E/Z = <5:95$ ,  $4:5 = >95:5$  (125.0 mg, 0.300 mmol, colorless oil).

$^1\text{H NMR}$  (392 MHz,  $\text{CDCl}_3$ ,  $\delta$ ): 0.04 (s, 6H), 0.89 (s, 9H), 1.25 (s, 12H), 1.48 (dt,  $J = 15.3, 7.0$  Hz,

2H), 1.57–1.64 (m, 3H), 1.76 (dt,  $J = 15.3, 7.0$  Hz, 2H), 2.16 (dt,  $J = 14.1, 7.0$  Hz, 4H), 3.54 (t,  $J = 6.7$  Hz, 2H), 3.61 (t,  $J = 6.7$  Hz, 2H), 6.32 (t,  $J = 7.0$  Hz, 1H).  $^{13}\text{C}$  NMR (99 MHz,  $\text{CDCl}_3$ ,  $\delta$ ): -5.3 ( $\text{CH}_3$ ), 18.3 (C), 24.7 ( $\text{CH}_3$ ), 25.0 ( $\text{CH}_2$ ), 25.9 ( $\text{CH}_3$ ), 27.3 ( $\text{CH}_2$ ), 27.5 ( $\text{CH}_2$ ), 32.3 ( $\text{CH}_2$ ), 32.4 ( $\text{CH}_2$ ), 45.1 ( $\text{CH}_2$ ), 62.7 ( $\text{CH}_2$ ), 83.0 (C), 146.1 (CH). HRMS-EI ( $m/z$ ):  $[\text{M}-\text{Me}]^+$  calcd for  $\text{C}_{20}\text{H}_{39}\text{O}_3\text{SiCl}^{11}\text{B}$ , 401.2454; found, 401.2445.

**(Z)-2-(1,11-Dichloroundec-5-en-6-yl)-4,4,5,5-tetramethyl-1,3,2-dioxaborolane [(Z)-4gg].**

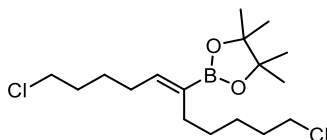

(Z)-4gg

The borylation reaction was conducted with 65.5 mg (0.501 mmol) of **1g**. The product (Z)-**4gg** was obtained in 85% yield with  $E/Z = <5:95$ ,  $4:5 = >95:5$  (148.3 mg, 0.426 mmol, colorless oil).

$^1\text{H}$  NMR (392 MHz,  $\text{CDCl}_3$ ,  $\delta$ ): 1.26 (s, 12H), 1.31–1.46 (m, 4H), 1.51–1.58 (m, 2H), 1.74–1.83 (m, 4H), 2.13 (t,  $J = 7.0$  Hz, 2H), 2.17 (t,  $J = 7.0$  Hz, 2H), 3.53 (t,  $J = 6.8$  Hz, 2H), 3.54 (t,  $J = 6.8$  Hz, 2H), 6.27 (t,  $J = 7.0$  Hz, 1H).  $^{13}\text{C}$  NMR (99 MHz,  $\text{CDCl}_3$ ,  $\delta$ ): 24.7 ( $\text{CH}_3$ ), 26.4 ( $\text{CH}_2$ ), 26.7 ( $\text{CH}_2$ ), 27.6 ( $\text{CH}_2$ ), 28.2 ( $\text{CH}_2$ ), 29.2 ( $\text{CH}_2$ ), 32.3 ( $\text{CH}_2$ ), 32.6 ( $\text{CH}_2$ ), 44.9 ( $\text{CH}_2$ ), 45.1 ( $\text{CH}_2$ ), 83.1 (C), 145.0 (CH). HRMS-EI ( $m/z$ ):  $[\text{M}]^+$  calcd for  $\text{C}_{17}\text{H}_{31}\text{O}_2\text{Cl}_2^{11}\text{B}$ , 348.1797; found, 348.1796.

**(Z)-2-(1-Cyclohexyloct-1-en-2-yl)-4,4,5,5-tetramethyl-1,3,2-dioxaborolane [(Z)-4ha].**

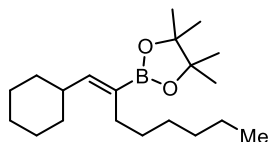

(Z)-4ha

The borylation reaction was conducted with 62.0 mg (0.507 mmol) of **1h**. The product (Z)-**4ha** was obtained in 84% yield with  $E/Z = <5:95$ ,  $4:5 = >95:5$  (134.6 mg, 0.420 mmol, colorless oil).

$^1\text{H}$  NMR (392 MHz,  $\text{CDCl}_3$ ,  $\delta$ ): 0.88 (t,  $J = 6.3$  Hz, 3H), 1.05–1.34 (m, 13H), 1.25 (s, 12H), 1.53–1.74 (m, 5H), 2.11 (t,  $J = 6.3$  Hz, 2H), 2.29–2.40 (m, 1H), 6.06 (d,  $J = 9.4$  Hz, 1H).  $^{13}\text{C}$  NMR (99 MHz,  $\text{CDCl}_3$ ,  $\delta$ ): 14.1 ( $\text{CH}_3$ ), 22.6 ( $\text{CH}_2$ ), 24.7 ( $\text{CH}_3$ ), 25.9 ( $\text{CH}_2$ ), 26.1 ( $\text{CH}_2$ ), 28.7 ( $\text{CH}_2$ ), 29.2 ( $\text{CH}_2$ ), 30.6 ( $\text{CH}_2$ ), 31.8 ( $\text{CH}_2$ ), 32.7 ( $\text{CH}_2$ ), 37.4 (CH), 82.9 (C), 151.1 (CH). HRMS-EI ( $m/z$ ):  $[\text{M}]^+$  calcd for  $\text{C}_{20}\text{H}_{37}\text{O}_2^{11}\text{B}$ , 320.2890; found, 320.2885.

**(Z)-2-[1-(Adamantan-1-yl)oct-1-en-2-yl]-4,4,5,5-tetramethyl-1,3,2-dioxaborolane [(Z)-4ia].**

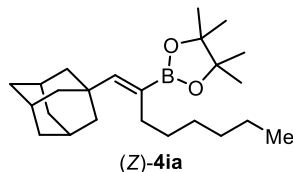

The borylation reaction was conducted with 87.8 mg (0.504 mmol) of **1i**. The product (Z)-**4ia** was obtained in 64% yield with  $E/Z = <5:95$ , **4:5** =  $>95:5$  (121.0 mg, 0.325 mmol, colorless oil).

$^1\text{H}$  NMR (392 MHz,  $\text{CDCl}_3$ ,  $\delta$ ): 0.86–0.90 (m, 3H), 1.22–1.35 (m, 8H), 1.24 (s, 12H), 1.65–1.70 (m, 6H), 1.79–1.83 (m, 6H), 1.93–1.97 (m, 3H), 2.24–2.28 (m, 2H), 5.94 (s, 1H).  $^{13}\text{C}$  NMR (99 MHz,  $\text{CDCl}_3$ ,  $\delta$ ): 14.1 ( $\text{CH}_3$ ), 22.6 ( $\text{CH}_2$ ), 24.7 ( $\text{CH}_3$ ), 24.8 (C), 28.8 (CH), 29.6 ( $\text{CH}_2$ ), 29.8 ( $\text{CH}_2$ ), 31.1 ( $\text{CH}_2$ ), 31.8 ( $\text{CH}_2$ ), 36.8 ( $\text{CH}_2$ ), 42.6 ( $\text{CH}_2$ ), 82.9 (C), 153.6 (CH). HRMS-ESI ( $m/z$ ):  $[\text{M}+\text{Na}]^+$  calcd for  $\text{C}_{24}\text{H}_{41}\text{O}_2^{11}\text{BNa}$ , 395.3096; found, 395.3092.

**(Z)-2-(2,2-Dimethyl-1-phenyldec-3-en-4-yl)-4,4,5,5-tetramethyl-1,3,2-dioxaborolane [(Z)-4ja].**

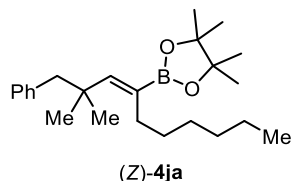

The borylation reaction was conducted with 86.1 mg (0.500 mmol) of **1j**. The product (Z)-**4ja** was obtained in 52% yield with  $E/Z = <5:95$ , **4:5** =  $>95:5$  (96.4 mg, 0.260 mmol, colorless oil).

$^1\text{H}$  NMR (392 MHz,  $\text{CDCl}_3$ ,  $\delta$ ): 0.87 (t,  $J = 6.8$  Hz, 3H), 1.11 (s, 6H), 1.23–1.31 (m, 8H), 1.25 (s, 12H), 2.19–2.24 (m, 2H), 2.72 (s, 2H), 6.18 (s, 1H), 7.12–7.26 (m, 5H).  $^{13}\text{C}$  NMR (99 MHz,  $\text{CDCl}_3$ ,  $\delta$ ): 14.1 ( $\text{CH}_3$ ), 22.6 ( $\text{CH}_2$ ), 24.7 ( $\text{CH}_3$ ), 28.3 ( $\text{CH}_3$ ), 29.5 ( $\text{CH}_2$ ), 29.7 ( $\text{CH}_2$ ), 30.6 ( $\text{CH}_2$ ), 31.8 ( $\text{CH}_2$ ), 38.7 (C), 49.2 ( $\text{CH}_2$ ), 83.0 (C), 125.8 (CH), 127.5 (CH), 130.7 (CH), 139.1 (C), 152.3 (CH). HRMS-EI ( $m/z$ ):  $[\text{M}-\text{Me}]^+$  calcd for  $\text{C}_{23}\text{H}_{36}\text{O}_2^{11}\text{B}$ , 355.2813; found, 355.2809.

**3-(2-Oxobutyl)oxazolidin-2-one (16kb)**

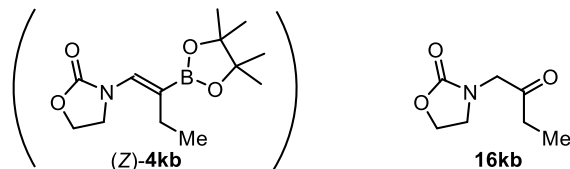

The borylation reaction was conducted with 62.6 mg (0.500 mmol) of **1k**. In order to remove an undesired boryl substitution product of the alkyl halide and protoboration product of the allene for the further purification and the determination of the regioselectivities, the oxidation of the boryl groups was performed. The corresponding ketone product **16kb** was obtained in 51% yield (40.4 mg, 0.257 mmol, colorless oil).

$^1\text{H}$  NMR (392 MHz,  $\text{CDCl}_3$ ,  $\delta$ ): 1.12 (t,  $J = 7.3$  Hz, 3H), 2.47 (q,  $J = 7.4$  Hz, 2H), 3.68 (t,  $J = 8.0$

Hz, 2H), 4.10 (s, 2H), 4.41 (t,  $J = 8.0$  Hz, 2H).  $^{13}\text{C}$  NMR (100 MHz,  $\text{CDCl}_3$ ,  $\delta$ ): 7.4 ( $\text{CH}_3$ ), 33.2 ( $\text{CH}_2$ ), 45.2 ( $\text{CH}_2$ ), 52.6 ( $\text{CH}_2$ ), 62.3 ( $\text{CH}_2$ ), 158.9 (C), 205.3 (C). HRMS-ESI ( $m/z$ ):  $[\text{M}+\text{Na}]^+$  calcd for  $\text{C}_7\text{H}_{11}\text{O}_3\text{NNa}$ , 180.0631; found, 180.0628.

### 3-(2-Oxoethyl)-1,3-oxazolidin-2-one (16ka)

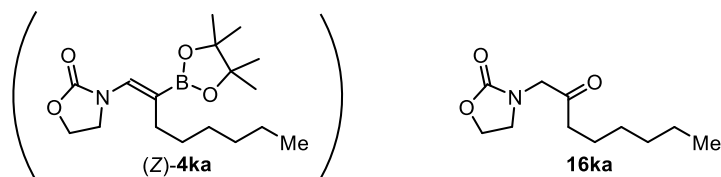

The borylation reaction was conducted with 62.6 mg (0.500 mmol) of **1k**. In order to remove an undesired boryl substitution product of the alkyl halide and protoboration product of the allene for the further purification and the determination of the regioselectivities, the oxidation of the boryl groups was performed. The corresponding ketone product **16ka** was obtained in 51% yield (54.8 mg, 0.257 mmol, colorless oil).

$^1\text{H}$  NMR (392 MHz,  $\text{CDCl}_3$ ,  $\delta$ ): 0.88 (t,  $J = 7.0$  Hz, 3H), 1.22–1.36 (m, 6H), 1.61 (quintet,  $J = 7.2$  Hz, 2H), 2.42 (t,  $J = 7.4$  Hz, 2H), 3.67 (t,  $J = 7.8$  Hz, 2H), 4.08 (s, 2H), 4.40 (t,  $J = 8.0$  Hz, 2H).  $^{13}\text{C}$  NMR (100 MHz,  $\text{CDCl}_3$ ,  $\delta$ ): 14.0 ( $\text{CH}_3$ ), 22.4 ( $\text{CH}_2$ ), 23.3 ( $\text{CH}_2$ ), 28.7 ( $\text{CH}_2$ ), 31.4 ( $\text{CH}_2$ ), 39.9 ( $\text{CH}_2$ ), 45.0 ( $\text{CH}_2$ ), 52.7 ( $\text{CH}_2$ ), 62.1 (CH), 158.7 (C), 204.8 (C). HRMS-ESI ( $m/z$ ):  $[\text{M}+\text{Na}]^+$  calcd for  $\text{C}_{11}\text{H}_{19}\text{O}_3\text{NNa}$ , 236.1257; found, 236.1260.

### 1-[(Z)-2-(4,4,5,5-Tetramethyl-1,3,2-dioxaborolan-2-yl)oct-1-en-1-yl]pyrrolidin-2-one [(Z)-4la]

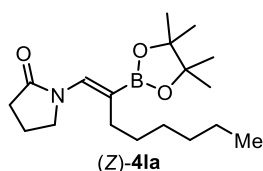

The borylation reaction was conducted with 61.6 mg (0.500 mmol) of **1l**. The product (Z)-**4la** was obtained in 48% yield with  $E/Z = <5:95$ , **4:5** =  $>95:5$  (76.8 mg, 0.239 mmol, colorless solid).

$^1\text{H}$  NMR (392 MHz,  $\text{CDCl}_3$ ,  $\delta$ ): 0.88 (t,  $J = 7.0$  Hz, 3H), 1.21–1.40 (m, 20H), 2.08 (quintet,  $J = 7.6$  Hz, 2H), 2.22 (t,  $J = 7.1$  Hz, 2H), 2.42 (t,  $J = 8.2$  Hz, 2H), 3.85 (t,  $J = 7.1$  Hz, 2H), 7.23 (s, 1H).  $^{13}\text{C}$  NMR (99 MHz,  $\text{CDCl}_3$ ,  $\delta$ ): 13.9 ( $\text{CH}_3$ ), 18.6 ( $\text{CH}_2$ ), 22.4 ( $\text{CH}_2$ ), 24.5 ( $\text{CH}_3$ ), 27.5 ( $\text{CH}_2$ ), 29.1 ( $\text{CH}_2$ ), 30.0 ( $\text{CH}_2$ ), 31.4 ( $\text{CH}_2$ ), 31.6 ( $\text{CH}_2$ ), 48.0 ( $\text{CH}_2$ ), 83.0 (C), 113.7 (br, B–C), 132.6 (CH), 174.9 (C). HRMS-ESI ( $m/z$ ):  $[\text{M}+\text{Na}]^+$  calcd for  $\text{C}_{18}\text{H}_{32}\text{O}_3^{11}\text{BNNa}$ , 344.2371; found, 344.2371.

### *N*-(2-Oxobutyl)-*N*-(*p*-tolyl)acetamide (**16mh**)

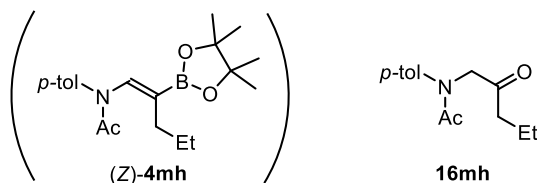

The borylation reaction was conducted with 93.6 mg (0.500 mmol) of **1m**. In order to remove an undesired boryl substitution product of the alkyl halide and protoboration product of the allene for the further purification and the determination of the regioselectivities, the oxidation of the boryl groups was performed. The corresponding ketone product **16mh** was obtained in 48% yield (55.9 mg, 0.240 mmol, colorless oil).

<sup>1</sup>H NMR (399 MHz, CDCl<sub>3</sub>, δ): 0.91 (t, *J* = 7.4 Hz, 3H), 1.63 (sextet, *J* = 7.3 Hz, 2H), 1.91 (s, 3H), 2.36 (s, 3H), 2.40 (t, *J* = 7.4 Hz, 2H), 4.39 (s, 2H), 7.19 (s, *J* = 8.0 Hz, 4H). <sup>13</sup>C NMR (99 MHz, CDCl<sub>3</sub>, δ): 13.6 (CH<sub>3</sub>), 16.9 (CH<sub>2</sub>), 21.0 (CH<sub>3</sub>), 21.9 (CH<sub>3</sub>), 41.8 (CH<sub>2</sub>), 58.8 (CH<sub>2</sub>), 127.6 (CH), 130.2 (CH), 137.9 (C), 141.0 (C), 170.8 (C), 204.9 (C). HRMS-ESI (*m/z*): [M+Na]<sup>+</sup> calcd for C<sub>14</sub>H<sub>19</sub>O<sub>2</sub>NNa, 256.1308; found, 256.1312.

### *N*-Benzyl-*N*-(2-oxobutyl)-4-methylbenzenesulfonamide (**16nb**)

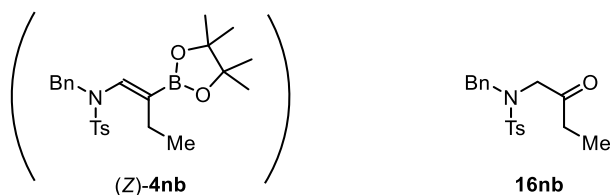

The borylation reaction was conducted with 149.7 mg (0.500 mmol) of **1n**. In order to remove an undesired boryl substitution product of the alkyl halide and protoboration product of the allene for the further purification and the determination of the regioselectivities, the oxidation of the boryl groups was performed. The corresponding ketone product **16nb** was obtained in 60% yield (99.6 mg, 0.301 mmol, colorless oil).

<sup>1</sup>H NMR (392 MHz, CDCl<sub>3</sub>, δ): 0.90 (t, *J* = 7.2 Hz, 3H), 2.25 (q, *J* = 7.4 Hz, 2H), 2.45 (s, 3H), 3.86 (s, 2H), 4.37 (s, 2H), 7.20–7.38 (m, 7H), 7.75 (d, *J* = 6.7 Hz, 2H). <sup>13</sup>C NMR (99 MHz, CDCl<sub>3</sub>, δ): 7.2 (CH<sub>3</sub>), 21.5 (CH<sub>3</sub>), 32.5 (CH<sub>2</sub>), 52.0 (CH<sub>2</sub>), 54.5 (CH<sub>2</sub>), 127.4 (CH), 128.1 (CH), 128.7 (CH), 128.8 (CH), 129.6 (CH), 134.9 (C), 136.1 (C), 143.6 (C), 206.4 (C). HRMS-ESI (*m/z*): [M+Na]<sup>+</sup> calcd for C<sub>18</sub>H<sub>21</sub>O<sub>3</sub>NNaS, 354.1134; found, 354.1137.

**(Z)-2-(1-(Benzyloxy)prop-1-ene-2-yl)-4,4,5,5-tetramethyl-1,3,2-dioxaborolane [(Z)-4ob]**

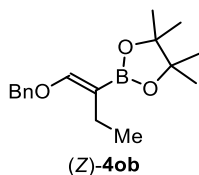

The borylation reaction was conducted with 74.6 mg (0.500 mmol) of **1o**. The product **(Z)-4ob** was obtained in 63% yield with *E/Z* = 10:90, **4:5** = >95:5 (91.3 mg, 0.317 mmol, colorless oil).

<sup>1</sup>H NMR (392 MHz, CDCl<sub>3</sub>, δ): 0.98 (t, *J* = 7.4 Hz, 3H), 1.24 (s, 12H), 2.16 (q, *J* = 7.4 Hz, 2H), 4.92 (s, 2H), 6.74 (s, 1H), 7.27–7.38 (m, 5H). <sup>13</sup>C NMR (99 MHz, CDCl<sub>3</sub>, δ): 14.7 (CH<sub>3</sub>), 18.4 (CH<sub>2</sub>), 24.6 (CH<sub>3</sub>), 74.0 (CH<sub>2</sub>), 82.5 (C), 108.4 (Br, B–C), 126.9 (CH), 127.7 (CH), 128.4 (CH), 137.5 (C), 156.3 (CH). HRMS-EI (*m/z*): [M]<sup>+</sup> calcd for C<sub>17</sub>H<sub>25</sub>O<sub>3</sub><sup>11</sup>B, 288.1900; found, 288.1894.

## 5. Comparison Experiments

### 5.1. Protoboration of an internal alkyne **7**

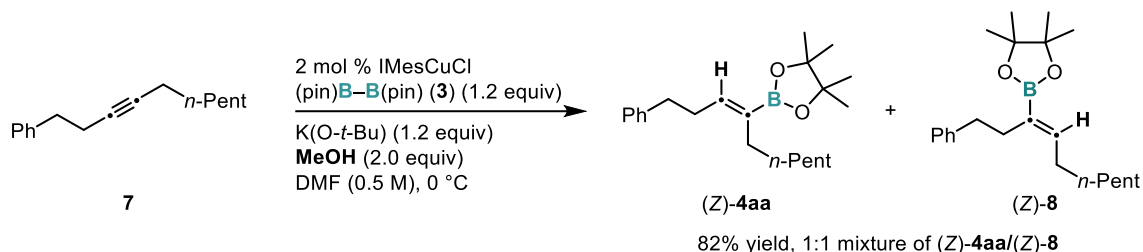

In an argon-filled grove-box, IMesCuCl (2.0 mg, 0.0050 mmol), bis(pinacolato)diboron (**3**) (76.2 mg, 0.300 mmol) and K(*O-t*-Bu) (33.7 mg, 0.300 mmol) were placed in a round-bottomed flask. Dry DMF (0.5 mL) was added in the flask through the rubber septum using a syringe. After stirring for 30 min at room temperature, **7** (54.0 mg, 0.252 mmol) and MeOH (16.0 mg, 0.500 mmol) were added to the mixture at 0 °C. After the reaction was completed, the reaction mixture was passed through a short silica gel column ( $\Phi$ : 10 mm, height of the silica-gel column: 90 mm) eluting with Et<sub>2</sub>O/hexane (10/90). The crude material was purified by flash column chromatography (SiO<sub>2</sub>, Et<sub>2</sub>O/hexane, 0:100–20:80) to give 1:1 mixture of (Z)-**4aa**/(Z)-**8** in 82% yield (70.7 mg, 0.207 mmol, colorless oil).

### 5.2. Protoboration of an internal allene **9**

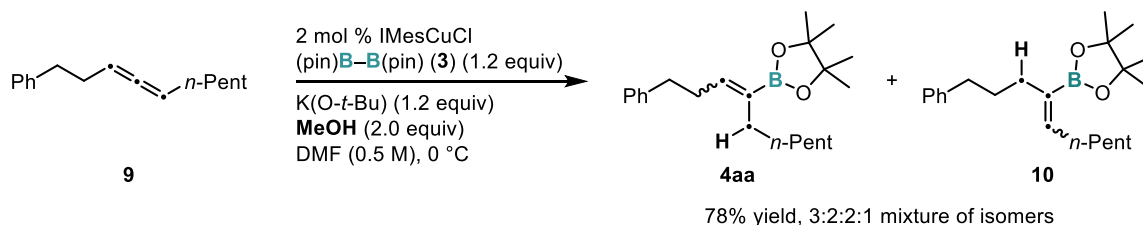

In an argon-filled grove-box, IMesCuCl (2.0 mg, 0.0050 mmol), bis(pinacolato)diboron (**3**) (76.2 mg, 0.300 mmol) and K(*O-t*-Bu) (33.7 mg, 0.300 mmol) were placed in a round-bottomed flask. Dry DMF (0.5 mL) was added in the flask through the rubber septum using a syringe. After stirring for 30 min at room temperature, **9** (53.6 mg, 0.250 mmol) and MeOH (16.0 mg, 0.500 mmol) were added to the mixture at 0 °C. After the reaction was completed, the reaction mixture was passed through a short silica gel column ( $\Phi$ : 10 mm, height of the silica-gel column: 90 mm) eluting with Et<sub>2</sub>O/hexane (10/90). The crude material was purified by flash column chromatography (SiO<sub>2</sub>, Et<sub>2</sub>O/hexane, 0:100–20:80) to give 3:2:2:1 mixture of isomers in 78% yield (66.4 mg, 0.194 mmol, colorless oil).

## 6. Suzuki–Miyaura Cross-coupling Reaction of Borylation Products

### 6.1. Reaction of (Z)-4aa with an aryl halide

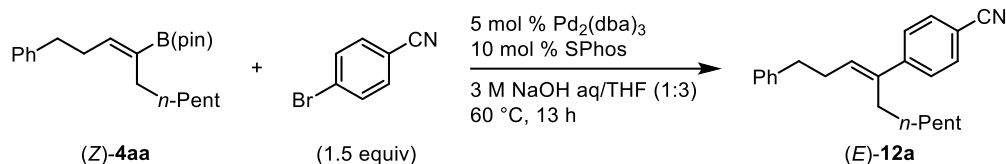

The Suzuki–Miyaura cross-coupling reaction of (Z)-4aa was conducted according to the literature procedure.<sup>19</sup> In an oven-dried reaction vial, (Z)-4aa (85.9 mg, 0.251 mmol), 4-bromobenzonitrile (68.7 mg, 0.375 mmol), Pd<sub>2</sub>(dba)<sub>3</sub> (4.6 mg, 0.005 mmol) and SPhos (4.1 mg, 0.01 mmol) were dissolved in THF (2.25 mL) under a nitrogen atmosphere. After the addition of 3 M NaOH aqueous solution (0.75 mL) into the vial, the mixture was stirred at 60 °C for 13 h. The mixture was then quenched by addition of water (5 mL) and extracted three times with Et<sub>2</sub>O (10 mL ×3). The combined organic layer was washed with brine, dried over MgSO<sub>4</sub> followed by filtration. After evaporation, the crude material was purified by silica gel chromatography (Et<sub>2</sub>O/hexane, 0:100–3:97) to give the corresponding coupling product (E)-12a as a mixture with 4-bromobenzonitrile (75.5 mg). The product ratio was calculated from <sup>1</sup>H NMR analysis of the purified material [(E)-12a: 0.206 mmol, 82% yield, 4-bromobenzonitrile: 0.055 mmol].

<sup>1</sup>H NMR (392 MHz, CDCl<sub>3</sub>, δ): 0.85 (t, *J* = 6.9 Hz, 3H), 1.16–1.28 (m, 8H), 2.38–2.46 (m, 2H), 2.53 (q, *J* = 7.6 Hz, 2H), 2.77 (t, *J* = 7.6 Hz, 2H), 5.76 (t, *J* = 7.4 Hz, 1H), 7.18–7.24 (m, 3H), 7.28–7.33 (m, 2H), 7.37–7.40 (m, 2H), 7.56–7.60 (m, 2H). <sup>13</sup>C NMR (99 MHz, CDCl<sub>3</sub>, δ): 14.0 (CH<sub>3</sub>), 22.5 (CH<sub>2</sub>), 28.4 (CH<sub>2</sub>), 29.1 (CH<sub>2</sub>), 29.3 (CH<sub>2</sub>), 30.6 (CH<sub>2</sub>), 31.5 (CH<sub>2</sub>), 35.8 (CH<sub>2</sub>), 109.9 (C), 119.1 (C), 126.0 (CH), 126.8 (CH), 128.35 (CH), 128.41 (CH), 130.7 (CH), 132.0 (CH), 139.7 (C), 141.5 (C), 147.9 (C). HRMS-EI (*m/z*): [M]<sup>+</sup> calcd for C<sub>23</sub>H<sub>27</sub>N, 317.2144; found, 317.2143.

### 6.2. Reaction of (Z)-4fa with an alkenyl halide

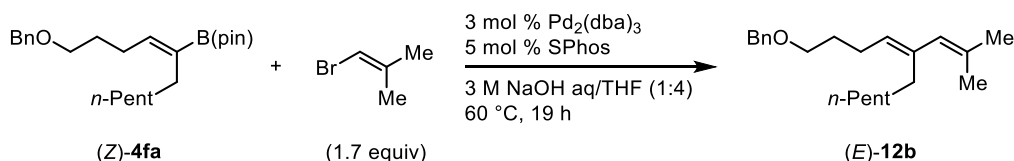

The Suzuki–Miyaura cross-coupling reaction of (Z)-4fa was conducted according to the literature procedure.<sup>19</sup> 1-Bromo-2-methylprop-1-ene (46.2 mg, 0.342 mmol), Pd<sub>2</sub>(dba)<sub>3</sub> (5.1 mg, 0.006 mmol), SPhos (4.0 mg, 0.010 mmol) were placed in an oven-dried reaction vial under a nitrogen atmosphere. A solution of (Z)-4fa (77.6 mg, 0.201 mmol) in dry THF (2.0 mL) was added to the vial followed by addition of 3 M NaOH aq (0.70 mL). Then, the mixture was warmed to 60 °C with stirring for 19 h. After the reaction mixture was cooled to room temperature, the reaction mixture was quenched by H<sub>2</sub>O and extracted with Et<sub>2</sub>O three times. The combined organic layer was then dried over MgSO<sub>4</sub>.



After filtration, the solvents were removed by evaporation. The crude mixture was purified by flash column chromatography (SiO<sub>2</sub>, Et<sub>2</sub>O/hexane, 0:100–5:95) to give the corresponding coupling product (*E*)-**12b** (64.8 mg, 0.198 mmol, 99%) as colorless oil.

<sup>1</sup>H NMR (392 MHz, CDCl<sub>3</sub>, δ): 0.87 (t, *J* = 6.3 Hz, 3H), 1.22–1.33 (m, 8H), 1.70–1.75 (m, 8H), 2.03 (t, *J* = 7.0 Hz, 2H), 2.18 (q, *J* = 7.0 Hz, 2H), 3.50 (t, *J* = 6.3 Hz, 2H), 4.51 (s, 2H), 5.15 (t, *J* = 7.0 Hz, 1H), 5.55 (s, 1H), 7.26–7.35 (m, 5H). <sup>13</sup>C NMR (99 MHz, CDCl<sub>3</sub>, δ): 14.1 (CH<sub>3</sub>), 19.3 (CH<sub>3</sub>), 22.6 (CH<sub>2</sub>), 24.5 (CH<sub>2</sub>), 26.4 (CH<sub>3</sub>), 28.6 (CH<sub>2</sub>), 29.2 (CH<sub>2</sub>), 30.0 (CH<sub>2</sub>), 31.0 (CH<sub>2</sub>), 31.8 (CH<sub>2</sub>), 69.9 (CH<sub>2</sub>), 72.9 (CH<sub>2</sub>), 127.4 (CH), 127.6 (CH), 127.8 (CH), 128.3 (CH), 132.7 (C), 138.0 (C), 138.6 (C). HRMS-EI (*m/z*): [M–Me]<sup>+</sup> calcd for C<sub>21</sub>H<sub>31</sub>O, 299.2375; found, 299.2376.

### 6.3. Reaction of (*Z*)-**4la** with an aryl halide

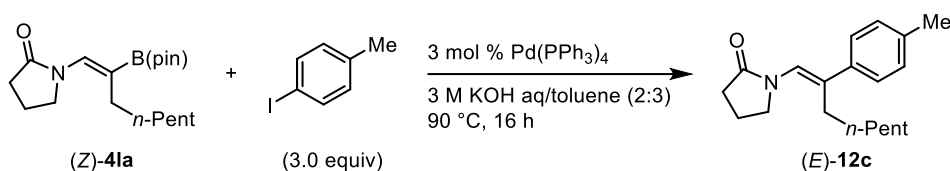

The Suzuki–Miyaura cross-coupling reaction of (*Z*)-**4la** was conducted according to the literature procedure.<sup>4</sup> In an argon-filled grove-box, (*Z*)-**4la** (32.1 mg, 0.100 mmol) and Pd(PPh<sub>3</sub>)<sub>4</sub> (3.5 mg, 0.0030 mmol) were placed in an oven-dried reaction vial. After the vial was sealed with a screw cap containing a Teflon<sup>TM</sup>-coated rubber septum, dry toluene (0.3 mL) was added in the vial through the rubber septum using a syringe. After the addition of 4-tolyl iodide (65.4 mg, 0.300 mmol) and 3 M KOH aqueous solution (0.2 mL) into the vial, the mixture was stirred at 90 °C for 16 h. After celite filtration, the celite washed with DCM and the mixture of the filtrate dried over MgSO<sub>4</sub> followed by filtration. After evaporation, the crude material was purified by silica gel chromatography (AcOEt/hexane, 15:85–25:75) to give the corresponding coupling product (*E*)-**12c** in 73% yield (20.9 mg, 0.0732 mmol, colorless oil).

<sup>1</sup>H NMR (392 MHz, CDCl<sub>3</sub>, δ): 0.85 (t, *J* = 6.7 Hz, 3H), 1.16–1.47 (m, 8H), 2.14 (quintet, *J* = 7.5 Hz, 2H), 2.34 (s, 3H), 2.40–2.58 (m, 4H), 3.77 (t, *J* = 7.1 Hz, 2H), 6.49 (s, 1H), 7.12 (d, *J* = 8.6 Hz, 3H), 7.24 (m, *J* = 8.2 Hz, 2H). <sup>13</sup>C NMR (99 MHz, CDCl<sub>3</sub>, δ): 14.0 (CH<sub>3</sub>), 19.0 (CH<sub>2</sub>), 21.1 (CH<sub>3</sub>), 22.6 (CH<sub>2</sub>), 28.8 (CH<sub>2</sub>), 29.5 (CH<sub>2</sub>), 30.0 (CH<sub>2</sub>), 30.6 (CH<sub>2</sub>), 31.6 (CH<sub>2</sub>), 49.3 (CH<sub>2</sub>), 121.7 (CH), 126.6 (CH), 128.9 (CH), 132.7 (C), 136.7 (C), 138.0 (C), 175.1 (C). HRMS-ESI (*m/z*): [M+Na]<sup>+</sup> calcd for C<sub>19</sub>H<sub>27</sub>ONNa, 308.1985; found, 308.1986.

#### 6.4. Reaction of (*Z*)-**4ob** with an aryl halide

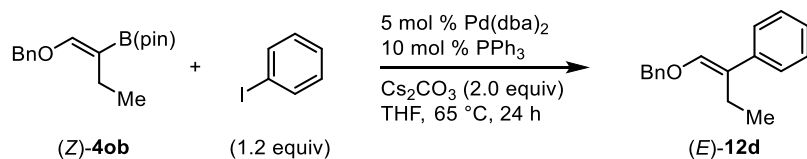

The Suzuki–Miyaura cross-coupling reaction of (*Z*)-**4ob** was conducted according to the literature procedure.<sup>20</sup> Pd<sub>2</sub>(dba)<sub>3</sub> (3.5 mg, 0.0030 mmol), PPh<sub>3</sub> (2.6 mg, 0.010 mmol) and Cs<sub>2</sub>CO<sub>3</sub> (65.2 mg, 0.200 mmol) were placed in an oven-dried reaction vial under a nitrogen atmosphere. After the vial was sealed with a screw cap containing a Teflon™-coated rubber septum, dry THF (0.5 mL) was added in the vial through the rubber septum using a syringe. After the addition of iodobenzene (24.3 mg, 0.119 mmol) and (*Z*)-**4ob** (28.8 mg, 0.100 mmol) into the vial, the mixture was stirred at 65 °C for 24 h. After the reaction was completed, the reaction mixture was passed through a short silica gel column ( $\Phi$ : 10 mm, height of the silica-gel column: 90 mm) eluting with Et<sub>2</sub>O/hexane (10/90). The crude material was purified by flash column chromatography (SiO<sub>2</sub>, Et<sub>2</sub>O/hexane, 0:100–2:98) to give the corresponding coupling product (*E*)-**12d** in 76% yield (21.4 mg, 0.0755 mmol, colorless oil).

<sup>1</sup>H NMR (392 MHz, CDCl<sub>3</sub>,  $\delta$ ): 1.02 (t, *J* = 7.4 Hz, 3H), 2.58 (q, *J* = 7.6 Hz, 2H), 4.91 (s, 2H), 6.42 (s, 1H), 7.15–7.40 (m, 10H). <sup>13</sup>C NMR (99 MHz, CDCl<sub>3</sub>,  $\delta$ ): 13.1 (CH<sub>3</sub>), 20.4 (CH<sub>2</sub>), 74.0 (CH<sub>2</sub>), 112.1 (C), 125.7 (CH), 125.9 (CH), 127.3 (CH), 127.9 (CH), 128.3 (CH), 128.5 (CH), 137.6 (C), 139.5 (C), 143.1 (CH). HRMS-EI (*m/z*): [M]<sup>+</sup> calcd for C<sub>17</sub>H<sub>18</sub>O, 238.1358; found, 238.1356.

## 7. Formal Total Synthesis of schizol A

### 7.1. Synthesis of allene 1p

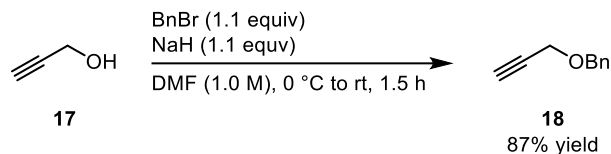

In a vacuum dried 50 mL two-neck round-bottomed flask, NaH (60% paraffin liquid dispersion, 880 mg, 22.0 mmol) was suspended in DMF (20 mL) at 0 °C. To the suspension, propargyl alcohol **17** (1.12 g, 20.0 mmol) was slowly added and stirred for 30 min. Then, benzyl bromide (2.6 mL, 22.0 mmol) was added, and the mixture was warmed up to room temperature. After stirring for 1.5 h at room temperature, the reaction mixture was quenched by 1 M HCl aqueous solution (40 mL) and extracted with AcOEt three times (40 mL  $\times$  3). The combined organic layer was then dried over MgSO<sub>4</sub>. After filtration, the solvents were removed by evaporation. The crude product was purified by flash column chromatography to obtain the corresponding propargyl ether **18** (2.54 g, 17.4 mmol, 87%) as a colorless oil.

<sup>1</sup>H NMR (392 MHz, CDCl<sub>3</sub>,  $\delta$ ): 2.48 (t,  $J$  = 2.2 Hz, 1H), 4.18 (d,  $J$  = 2.7 Hz, 2H), 4.62 (s, 2H), 7.28–7.40 (m, 5H). <sup>13</sup>C NMR (100 MHz, CDCl<sub>3</sub>,  $\delta$ ): 57.0 (CH<sub>2</sub>), 71.5 (C), 74.6 (CH<sub>2</sub>), 79.6 (CH), 127.9 (CH), 128.1 (CH), 128.4 (CH), 137.2 (C). HRMS-ESI ( $m/z$ ): [M]<sup>+</sup> calcd for C<sub>10</sub>H<sub>10</sub>O<sub>1</sub>, 146.0732; found, 146.0730.

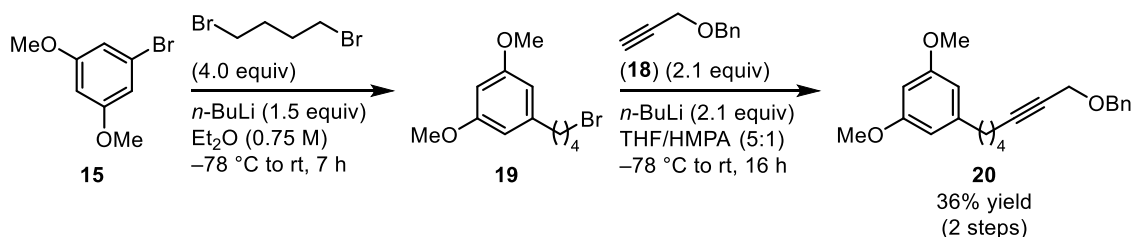

In a vacuum dried 50 mL two-neck round-bottomed flask, aryl bromide **15** (3.26 g, 15.0 mmol) was dissolved in Et<sub>2</sub>O (20 mL) under a nitrogen atmosphere. After cooled to -78 °C, to this solution was added *n*-BuLi (14.1 mL, 1.6 M solution in THF, 22.5 mmol) dropwise and the mixture was warmed up to 0 °C. After stirred for 30 min, the reaction mixture was cooled to -78 °C again. Then, to the reaction mixture was added 1,4-dibromobutane (7.1 mL, 60 mmol) dropwise and the mixture was warmed up to room temperature. After 7 h, the resulting mixture was diluted with water (30 mL) and extracted with Et<sub>2</sub>O three times. The combined organic layer was then dried over Mg<sub>2</sub>SO<sub>4</sub>. After filtration, the solvents were removed by evaporation. The crude product was purified by flash column chromatography to give the mixture of corresponding coupling product **19** and 1,3-dimethoxybenzene (colorless oil).

In a vacuum dried 50 mL two-neck round-bottomed flask, propargyl ether **18** was dissolved in THF

(30 mL) under a nitrogen atmosphere. After cooled to  $-78\text{ }^{\circ}\text{C}$ , to this solution was added *n*-BuLi (10.5 mL, 1.6 M solution in THF, 16.2 mmol) dropwise and the mixture was warmed up to  $0\text{ }^{\circ}\text{C}$ . After stirred for 30 min, to the reaction mixture was added HMPA (7.7 ml) and alkyl bromide **19** solution in THF (10 ml). The reaction mixture was warmed up to room temperature and stirred for 16 h. After the reaction was completed, the reaction mixture was cooled to  $0\text{ }^{\circ}\text{C}$  and diluted with water (20 ml). The resulting mixture was extracted with Et<sub>2</sub>O three times, and the combined organic layer was then dried over Mg<sub>2</sub>SO<sub>4</sub>. After filtration, the solvents were removed by evaporation. The crude product was purified by flash column chromatography to give the corresponding inner alkyne **20** in 36% yield (1.84 g, 5.43 mmol, colorless oil) in 2 steps.

<sup>1</sup>H NMR (400 MHz, CDCl<sub>3</sub>, δ): 1.52–1.63 (m, 2H), 1.74 (quintet, *J* = 7.4 Hz, 2H), 2.27 (tt, *J* = 6.6 Hz, 2.2 Hz, 2H), 2.58 (t, *J* = 7.6 Hz, 2H), 3.77 (s, 6H), 4.15 (t, *J* = 2.2 Hz, 2H), 4.58 (s, 2H), 6.30 (t, *J* = 2.0 Hz, 1H), 6.35 (d, *J* = 2.0 Hz, 2H), 7.25–7.39 (m, 5H). <sup>13</sup>C NMR (100 MHz, CDCl<sub>3</sub>, δ): 18.6 (CH<sub>2</sub>), 28.0 (CH<sub>2</sub>), 30.2 (CH<sub>2</sub>), 35.6 (CH<sub>2</sub>), 55.1 (CH<sub>3</sub>), 57.6 (CH<sub>2</sub>), 71.2 (CH<sub>2</sub>), 76.0 (C), 86.8 (C), 97.5 (CH), 106.3 (CH), 127.6 (CH), 128.0 (CH), 128.3 (CH), 137.5 (C), 144.6 (C), 160.6 (C). HRMS-EI (*m/z*): [M]<sup>+</sup> calcd for C<sub>22</sub>H<sub>26</sub>O<sub>3</sub>, 338.1882; found, 338.1879.

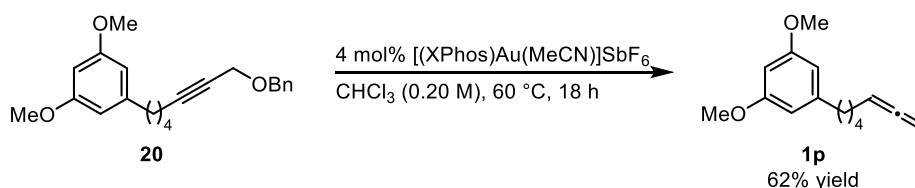

[(XPhos)Au(MeCN)]SbF<sub>6</sub> (33.8 mg, 0.0356 mmol) were placed in an oven-dried reaction vial. After the vial was sealed with a screw cap containing a Teflon®-coated rubber septum, the vial was connected to a vacuum/nitrogen manifold through a needle. It was evacuated and then backfilled with nitrogen. This cycle was repeated three times. Dry CHCl<sub>3</sub> (4.5 mL) and inner alkyne **20** were added to the vial through the rubber septum using a syringe and the reaction mixture was warmed up to  $60\text{ }^{\circ}\text{C}$ . After stirring for 24 h, the reaction mixture was cooled to room temperature and passed through a short silica gel column (Φ: 10 mm, the height of the silica-gel column: ca. 30 mm) eluting with Et<sub>2</sub>O/hexane (10/90). The crude material was purified by flash column chromatography to give the corresponding allene product **1p** in 62% yield (129.1 mg, 0.556 mmol, colorless oil).

<sup>1</sup>H NMR (392 MHz, CDCl<sub>3</sub>, δ): 1.46 (quintet, *J* = 7.5 Hz, 2H), 1.65 (quintet, *J* = 7.6 Hz, 2H), 1.99–2.08 (m, 2H), 2.56 (t, *J* = 7.6 Hz, 2H), 3.78 (s, 6H), 4.62–4.68 (m, 2H), 5.09 (quintet, *J* = 6.7 Hz, 1H), 6.30 (t, *J* = 2.3 Hz, 1H), 6.34 (d, *J* = 2.3 Hz, 2H). <sup>13</sup>C NMR (99 MHz, CDCl<sub>3</sub>, δ): 28.0 (CH<sub>2</sub>), 28.7 (CH<sub>2</sub>), 30.6 (CH<sub>2</sub>), 36.0 (CH<sub>2</sub>), 55.1 (CH<sub>3</sub>), 74.6 (CH<sub>2</sub>), 89.8 (CH), 97.5 (CH), 106.4 (CH), 145.0 (C), 160.6 (C), 208.4 (C). HRMS-EI (*m/z*): [M]<sup>+</sup> calcd for C<sub>15</sub>H<sub>20</sub>O<sub>2</sub>, 232.1463; found, 232.1459.

## 7.2. Synthesis of alkenyl boronate (**Z**)-**4ph**

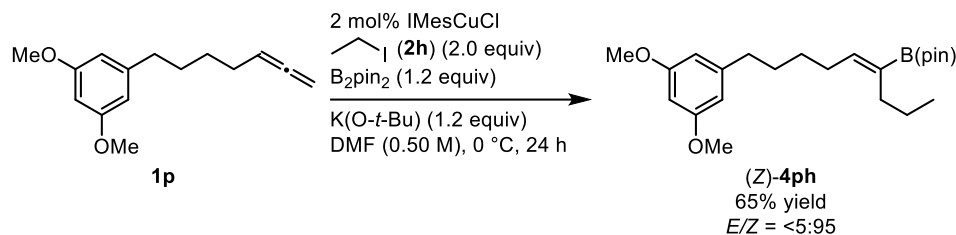

IMesCuCl was prepared according to the literature.<sup>18</sup> In an argon-filled grove-box, IMesCuCl (4.5 mg, 0.0111 mmol), bis(pinacolato)diboron (**3**) (169.6 mg, 0.668 mmol), and K(O-*t*-Bu) (75.0 mg, 0.668 mmol) were placed in an oven-dried reaction vial. After the vial was sealed with a screw cap containing a Teflon<sup>TM</sup>-coated rubber septum, dry DMF (1.11 mL) was added in the vial through the rubber septum using a syringe. After stirred for 15 min, the reaction mixture was cooled to 0 °C. After stirred at 0 °C for 10 min, **1p** (129.1 mg, 0.556 mmol) and **2h** (173.1 mg, 1.11 mmol) were added to the mixture. The reaction mixture was stirred at 0 °C for 24 h. After the reaction was completed, the reaction mixture was passed through a short silica gel column ( $\Phi$ : 10 mm, height of the silica-gel column: 90 mm) eluting with Et<sub>2</sub>O/hexane (10/90). The crude material was purified by flash column chromatography (SiO<sub>2</sub>, Et<sub>2</sub>O/hexane, 0:100–20:80) to give the corresponding alkenyl boronate (**Z**)-**4ph** in 65% yield with E/Z = <5:95, **4:5** = >95:5 (141.1 mg, 0.363 mmol, colorless oil).

<sup>1</sup>H NMR (400 MHz, CDCl<sub>3</sub>,  $\delta$ ): 0.88 (t, *J* = 7.0 Hz, 3H), 1.29 (s, 12H), 1.30–1.49 (m, 4H), 1.63 (quintet, *J* = 7.5 Hz, 2H), 2.04–2.20 (m, 4H), 2.55 (t, *J* = 7.6 Hz, 2H), 3.78 (s, 6H), 6.25–6.32 (m, 2H), 6.32–6.37 (m, 2H). <sup>13</sup>C NMR (100 MHz, CDCl<sub>3</sub>,  $\delta$ ): 14.0 (CH<sub>3</sub>), 23.3 (CH<sub>2</sub>), 24.7 (CH<sub>3</sub>), 28.3 (CH<sub>2</sub>), 28.8 (CH<sub>2</sub>), 30.5 (CH<sub>2</sub>), 31.0 (CH<sub>2</sub>), 36.1 (CH<sub>2</sub>), 55.2 (CH<sub>3</sub>), 82.9 (C), 97.6 (CH), 106.4 (CH), 132.3 (br, B–C), 145.1 (C), 145.7 (CH), 160.6 (C). HRMS-EI (*m/z*): [M]<sup>+</sup> calcd for C<sub>23</sub>H<sub>37</sub>O<sub>4</sub><sup>11</sup>B, 388.2789; found, 388.2779.

## 7.3. Synthesis of (**E**)-**12e**

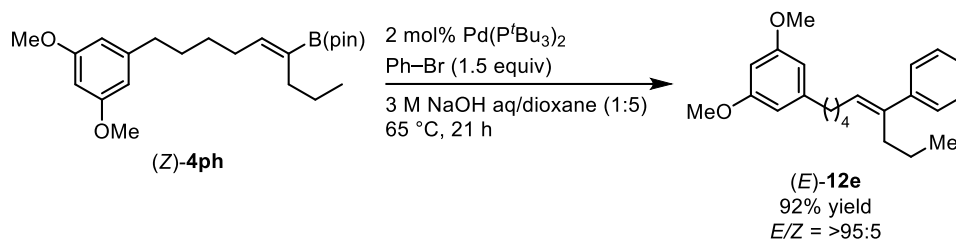

The Suzuki–Miyaura cross-coupling reaction of (**Z**)-**4ph** was conducted according to the literature procedure.<sup>4</sup> In an argon-filled grove-box, Pd(P<sup>*t*</sup>Bu<sub>3</sub>)<sub>4</sub> (1.0 mg, 0.0020 mmol) were placed in an oven-dried reaction vial. After the vial was sealed with a screw cap containing a Teflon<sup>TM</sup>-coated rubber septum, dry 1,4-dioxane (0.5 mL) was added in the vial through the rubber septum using a syringe.

After the addition of (*Z*)-**4ph** (38.8 mg, 0.100 mmol), bromobenzene (18.8 mg, 0.120 mmol) and 3 M NaOH aqueous solution (0.1 mL) into the vial, the mixture was warmed to 65 °C. After stirred for 21 h, the reaction mixture was cooled to room temperature and passed through a short silica gel column ( $\Phi$ : 10 mm, height of the silica-gel column: 90 mm) eluting with Et<sub>2</sub>O/hexane (10/90). The crude material was purified by flash column chromatography to give the corresponding coupling product (*E*)-**12e** in 92% yield with *E/Z* = >95:5 (31.0 mg, 0.0916 mmol, colorless oil).

<sup>1</sup>H NMR (392 MHz, CDCl<sub>3</sub>,  $\delta$ ): 0.87 (t, *J* = 7.4 Hz, 3H), 1.35 (sextet, *J* = 3.5 Hz, 2H), 1.49 (quintet, *J* = 7.0 Hz, 2H), 1.68 (quintet, *J* = 8.2 Hz, 2H), 2.22 (q, *J* = 7.2 Hz, 2H), 2.46 (t, *J* = 7.6 Hz, 2H), 2.58 (t, *J* = 7.6 Hz, 2H), 3.78 (s, 6H), 5.64 (t, *J* = 7.2 Hz, 1H), 6.30 (t, *J* = 2.5 Hz, 1H), 6.35 (d, *J* = 2.0 Hz, 2H), 7.18–7.24 (m, 1H), 7.26–7.35 (m, 4H). <sup>13</sup>C NMR (100 MHz, CDCl<sub>3</sub>,  $\delta$ ): 14.0 (CH<sub>3</sub>), 21.8 (CH<sub>2</sub>), 28.4 (CH<sub>2</sub>), 29.5 (CH<sub>2</sub>), 30.9 (CH<sub>2</sub>), 31.7 (CH<sub>2</sub>), 36.2 (CH<sub>2</sub>), 55.2 (CH<sub>3</sub>), 97.6 (CH), 106.4 (CH), 126.3 (CH), 126.4 (CH), 128.1 (CH), 129.0 (CH), 140.0 (C), 143.4 (C), 145.1 (C), 160.7 (C). HRMS-EI (*m/z*): [M]<sup>+</sup> calcd for C<sub>23</sub>H<sub>30</sub>O<sub>2</sub>, 338.2246; found, 338.2244.

## 8. Computational Study

### 8.1. Calculation method details

All geometry optimizations and thermal energy correction calculations (frequency analyses) using density functional theory (DFT) were performed with the Gaussian 16 (revision C.01)<sup>21</sup> suite of programs. The thresholds defined in Gaussian 16 were used. The geometry optimizations were carried out at  $\omega$ B97X-D<sup>22</sup> level of theory with a mixed basis set [SDD<sup>23</sup> for Cu atom, and 6-31G(d)<sup>24</sup> for the other atoms]. The solvation effect of DMF was included in the calculations using SMD solvation model.<sup>25</sup> Harmonic frequency calculations were conducted at the same level of theory on the optimized geometries to check all the stationary points as either minima or first-order saddle points. Intrinsic reaction coordinate (IRC)<sup>26</sup> calculations were carried out to confirm the transition states connecting the correct reactants and products on the potential energy surface. Then, the self-consistent field (SCF) energies of the optimized molecular systems were corrected at a higher level of theory. For this purpose, we chose  $\omega$ B97X-D<sup>22</sup> functional with another mixed basis set [SDD<sup>23</sup> for Cu atom, and 6-311+G(d,p)<sup>24</sup> for the other atoms]. The solvation effect of DMF was included in the calculations using SMD solvation model.<sup>25</sup>

Summary:  $\omega$ B97X-D/SDD, 6-311+G(d,p)/SMD(DMF)// $\omega$ B97X-D/SDD, 6-31G(d)/SMD(DMF).

### 8.2. Calculated properties of all structures

Table S1. Calculated energies and thermochemical parameters of the optimized structures.

| Structure                      | SCF energy<br>[hartree] | $H$<br>[hartree] | $TS$<br>[hartree] | $G$<br>[hartree] |
|--------------------------------|-------------------------|------------------|-------------------|------------------|
| Substrate <b>1</b>             | -155.962079             | -155.872210      | 0.032649          | -155.904859      |
| Catalyst <b>Int2</b>           | -155.873154             | -1532.181045     | 0.103293          | -1532.284338     |
| <b>TS</b> <sup>alkenyl-Z</sup> | -1688.762278            | -1688.054519     | 0.111634          | -1688.166153     |
| <b>TS</b> <sup>alkenyl-E</sup> | -1688.757495            | -1688.049891     | 0.110283          | -1688.160174     |
| <b>(Z)-Int3</b>                | -1688.846123            | -1688.135629     | 0.112073          | -1688.247702     |
| <b>(E)-Int3</b>                | -1688.840612            | -1688.129926     | 0.110694          | -1688.240620     |
| <b>Int3'</b>                   | -1688.838475            | -1688.128026     | 0.110235          | -1688.238261     |

## 9. References

1. Kuang, J.; Shengming, M. An Efficient Synthesis of Terminal Allenes from Terminal 1-Alkynes. *J. Org. Chem.* **2009**, *74*, 1763–1765.
2. Hill, A. W.; Elsegood, M. R. J.; Kimber, M. C. An Intermolecular Hydroamination of Allenamides with Arylamines Catalyzed by Cationic Au(I) Salts. *J. Org. Chem.* **2010**, *75*, 5406–5409.
3. Fenández, I.; Monterde, M. I.; Plumet, J. On the Base-Induced Isomerization of Cyclic Propargylamides to Cyclic Allenamides. *Tetrahedron Lett.* **2005**, *46*, 6029–6031.
4. García, L.; Sendra, J.; Miralles, N.; Reyes, E.; Carbó, J. J.; Vicario, J. L.; Fernández, E. Transition-Metal-Free Stereoselective Borylation of Allenamides. *Chem. Eur. J.* **2018**, *24*, 14059–14063.
5. Suárez-Pantiga, S.; Hernández-Díaz, C.; Piedrafita, M.; Rubio, E.; González, J. M. Phosphite-Gold(I)-Catalyzed [2+2] Intermolecular Cycloaddition of Enol Ethers with N-Allenylsulfonamides. *Adv. Synth. Catal.* **2012**, *354*, 1651–1657.
6. Trost, B. M.; Xie, J. Palladium-Catalyzed Asymmetric Ring Expansion of Allenylcyclobutanols: An Asymmetric Wagner-Meerwein Shift. *J. Am. Chem. Soc.* **2006**, *128*, 6044–6045.
7. Ren, G. B.; Wu, Y. Enantioselective Total Synthesis and Correction of the Absolute Configuration of Megislactone. *Tetrahedron* **2008**, *64*, 4408–4415.
8. Bolte, B.; Odabachian, Y.; Gagosz, F. Gold(I)-Catalyzed Rearrangement of Propargyl Benzyl Ethers: A Practical Method for the Generation and in Situ Transformation of Substituted Allenes. *J. Am. Chem. Soc.* **2010**, *132*, 7294–7296.
9. Chanthamath, S.; Chua, H. W.; Kimura, S.; Shibatomi, K.; Iwasa, S. Highly Regio- and Stereoselective Synthesis of Alkylidenecyclopropanes via Ru(II)-Pheox Catalyzed Asymmetric Inter- and Intramolecular Cyclopropanation of Allenes. *Org. Lett.* **2014**, *16*, 3408–3411.
10. Snead, R. F.; Nekkunda, J.; Santos, W. L. Copper(II)-Catalyzed Protoboration of Allenes in Aqueous Media and Open Air. *New J. Chem.* **2021**, *45*, 14925–14931.
11. Semba, K.; Bessho, N.; Fujihara, T.; Terao, J.; Tsuji, Y. Copper-Catalyzed Borylative Allyl-Allyl Coupling Reaction. *Angew. Chem., Int. Ed.* **2014**, *53*, 9007–9011.
12. Arseniyadis, S.; Gore, J.; Roumestant, M. L. Spectres de Masse de Composés Alleniques-I. Transposition de Type McLafferty de Groupes Hétéroatomiques et de Phényle Sur Le Carbone Allenique Central. *Tetrahedron* **1979**, *35*, 353–363.
13. Liu, Z.; Breit, B. Rhodium-Catalyzed Regio- and Enantioselective Addition of N-Hydroxyphthalimide to Allenes: A Strategy to Synthesize Chiral Allylic Alcohols. *Org. Lett.* **2018**, *20*, 300–303.



14. Wang, Y.; Scrivener, S. G.; Zuo, X. D.; Wang, R.; Palermo, P. N.; Murphy, E.; Durham, A. C.; Wang, Y. M. Iron-Catalyzed Contrasteric Functionalization of Allenic C(Sp<sup>2</sup>)-H Bonds: Synthesis of  $\alpha$ -Aminoalkyl 1,1-Disubstituted Allenes. *J. Am. Chem. Soc.* **2021**, *143*, 14998–15004.
15. Hasenbeck, M.; Ahles, S.; Averdunk, A.; Becker, J.; Gellrich, U. Formation of Nucleophilic Allylboranes from Molecular Hydrogen and Allenes Catalyzed by a Pyridonate Borane That Displays Frustrated Lewis Pair Reactivity. *Angew. Chem., Int. Ed.* **2020**, *59*, 23885–23891.
16. Ozawa, Y.; Koriyama, H.; Shiratori, Y.; Ito, H. Copper(I)-Catalyzed Regio- and Stereoselective Silaboration of Terminal Allenes. *ACS Org. Inorg. Au* **2023**, *3*, 104–108.
17. Satoh, T.; Itoh, N.; Watanabe, S.; Koike, H.; Matsuno, H.; Matsuda, K.; Yamakawa, K. Ligand Exchange Reaction of Sulfoxides in Organic Synthesis: A Novel Method for Synthesizing Acetylenes and Allenes from Carbonyl Compounds through Sulfoxides Having a Trifluoro-Methanesulfonyloxy Group on the  $\beta$ -Carbon. *Tetrahedron* **1995**, *51*, 9327–9338.
18. Santoro, O.; Collado, A.; Slawin, A. M. Z.; Nolan, S. P.; Cazin, C. S. J. A General Synthetic Route to [Cu(X)(NHC)] (NHC = N-Heterocyclic Carbene, X = Cl, Br, I) Complexes. *Chem. Commun.* **2013**, *49*, 10483–10485.
19. Meng, F.; McGrath, K. P.; Hoveyda, A. H. Multifunctional Organoboron Compounds for Scalable Natural Product Synthesis. *Nature* **2014**, *513*, 367–374.
20. Cui, W.; Mao, M.; He, Z.; Zhu, G. Regioselective and Stereoselective Entry to  $\beta,\beta$ -Disubstituted Vinyl Ethers via the Sequential Hydroboration/Suzuki-Miyaura Coupling of Ynol Ethers. *J. Org. Chem.* **2013**, *78*, 9815–9821.
21. Gaussian 16, Revision C.01, M. J. Frisch, G. W. Trucks, H. B. Schlegel, G. E. Scuseria, M. A. Robb, J. R. Cheeseman, G. Scalmani, V. Barone, G. A. Petersson, H. Nakatsuji, X. Li, M. Caricato, A. V. Marenich, J. Bloino, B. G. Janesko, R. Gomperts, B. Mennucci, H. P. Hratchian, J. V. Ortiz, A. F. Izmaylov, J. L. Sonnenberg, D. Williams-Young, F. Ding, F. Lipparini, F. Egidi, J. Goings, B. Peng, A. Petrone, T. Henderson, D. Ranasinghe, V. G. Zakrzewski, J. Gao, N. Rega, G. Zheng, W. Liang, M. Hada, M. Ehara, K. Toyota, R. Fukuda, J. Hasegawa, M. Ishida, T. Nakajima, Y. Honda, O. Kitao, H. Nakai, T. Vreven, K. Throssell, J. A. Montgomery, Jr., J. E. Peralta, F. Ogliaro, M. J. Bearpark, J. J. Heyd, E. N. Brothers, K. N. Kudin, V. N. Staroverov, T. A. Keith, R. Kobayashi, J. Normand, K. Raghavachari, A. P. Rendell, J. C. Burant, S. S. Iyengar, J. Tomasi, M. Cossi, J. M. Millam, M. Klene, C. Adamo, R. Cammi, J. W. Ochterski, R. L. Martin, K. Morokuma, O. Farkas, J. B. Foresman, and D. J. Fox, Gaussian, Inc., Wallingford CT, **2016**.
22. Chai, J. Da; Head-Gordon, M. Long-Range Corrected Hybrid Density Functionals with Damped Atom-Atom Dispersion Corrections. *Phys. Chem. Chem. Phys.* **2008**, *10*, 6615–6620.

23. Igel, G.; Wedig, U.; Dolg, M.; Fuentealba, P.; Preuss, H.; Stoll, H.; Frey, R. Cu and Ag as One-Valence-Electron Atoms: Pseudopotential CI Results for CuO and AgO. *J. Chem. Phys.* **1984**, *81*, 2737–2740.
24. Ditchfield, R.; Hehre, W. J.; Pople, J. A. Self-Consistent Molecular-Orbital Methods. IX. An Extended Gaussian-Type Basis for Molecular-Orbital Studies of Organic Molecules. *J. Chem. Phys.* **1971**, *54*, 720–723.
25. Marenich, A. V.; Cramer, C. J.; Truhlar, D. G. Universal Solvation Model Based on Solute Electron Density and on a Continuum Model of the Solvent Defined by the Bulk Dielectric Constant and Atomic Surface Tensions, *J. Phys. Chem. B* **2009**, *113*, 6378–6396.
26. Fukui, K. The Path of Chemical Reactions - The IRC Approach, *Acc. Chem. Res.* **1981**, *14*, 363–368.

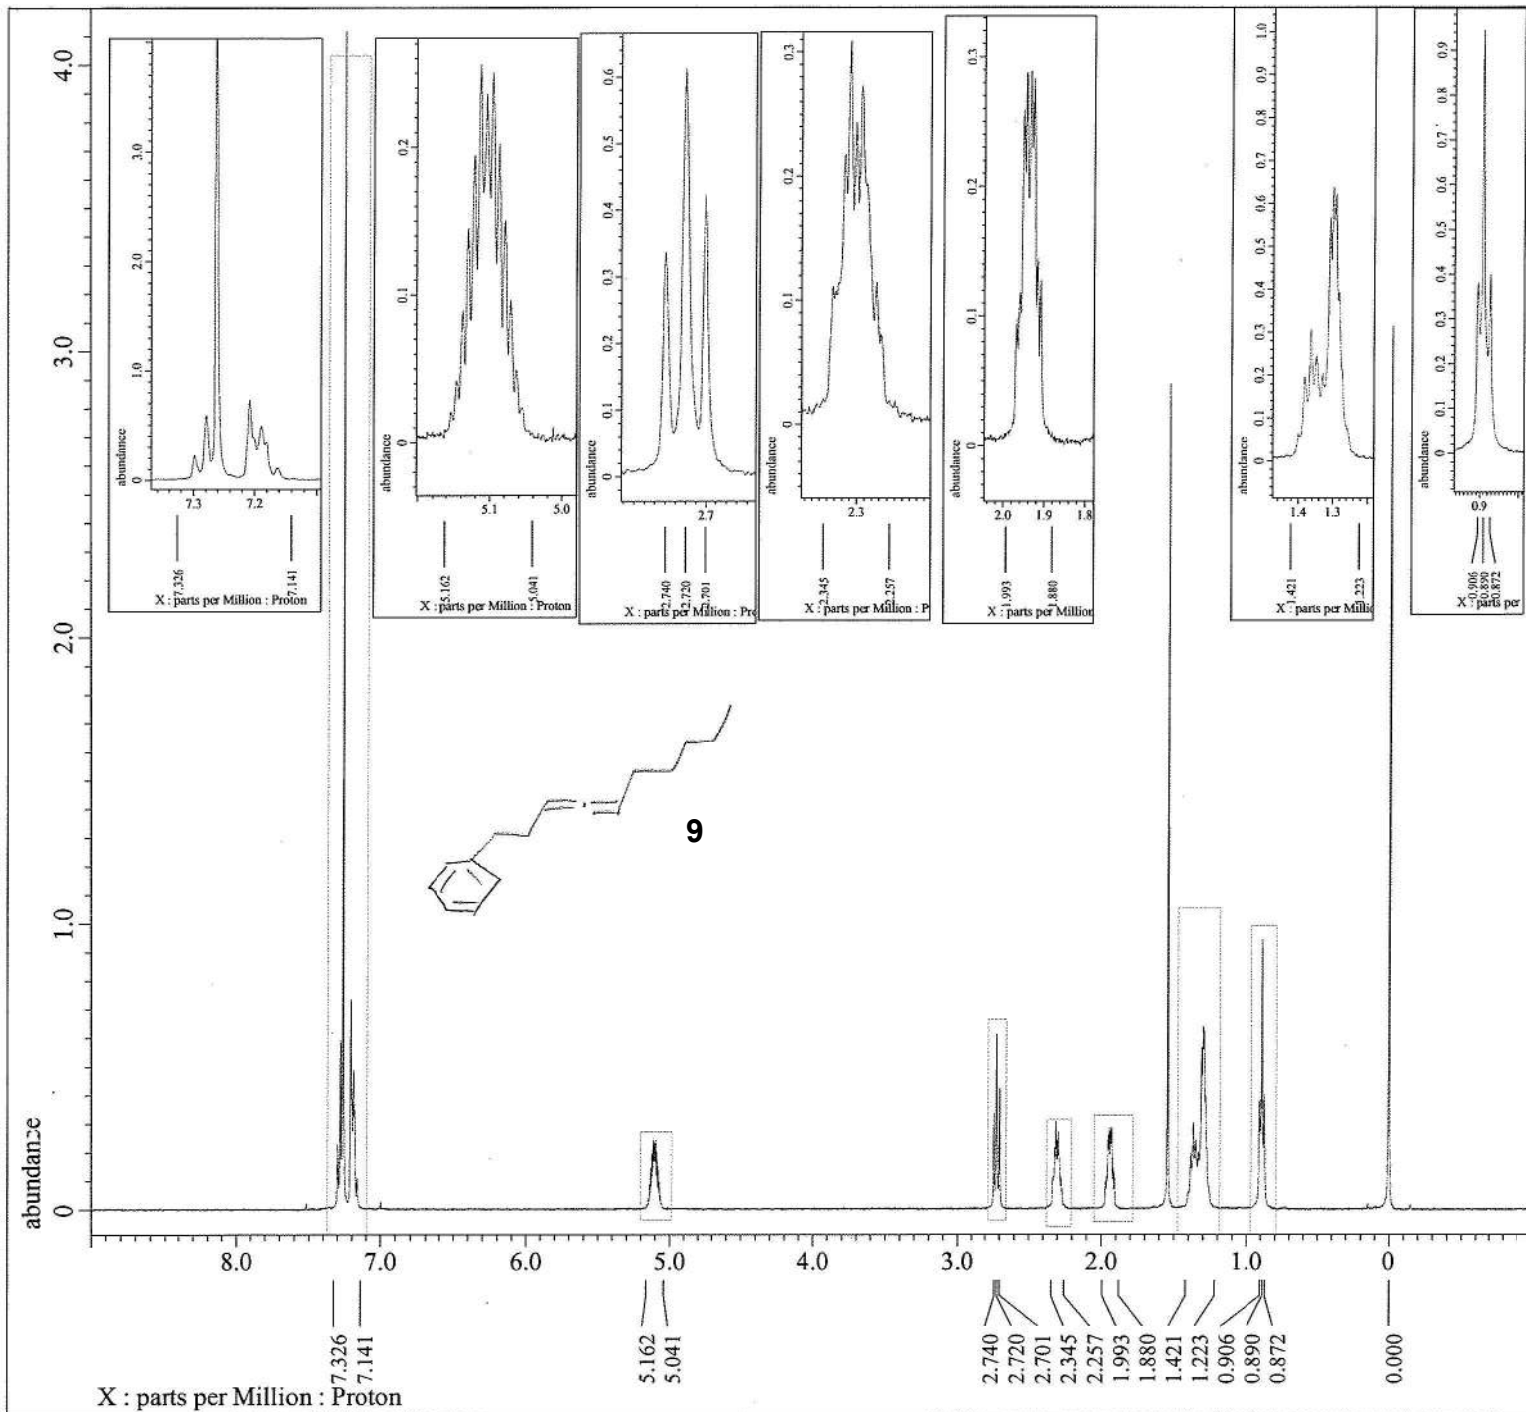

```

----- PROCESSING PARAMETERS -----
dc_balance( 0, FALSE )
sexp( 0.2[Hz], 0.0[s] )
trapezoid( 0[%], 0[%], 80[%], 100[%] )
zerofill( 1 )
fft( 1, TRUE, TRUE )
machinephase
ppm

Derived from: KRY-154(2) pure_Proton-1-1.jdf

Filename      = KRY-154(2) pure_Proton-1-
Author       = element
Experiment   = proton.jxp
Sample_Id    = KRY-154(2) pure
Solvent      = CHLOROFORM-D
Actual_Start_Time = 27-JUL-2021 15:36:34
Revision_Time  = 7-FEB-2022 09:32:36

Comment      = single_pulse
Data Format   = 1D COMPLEX
Dim Size     = 13107
X_Domain     = Proton
Dim Title    = Proton
Dim Units    = [ppm]
Dimensions   = X
Site         = JNM-ECS400
Spectrometer = DELTA2_NMR

Field Strength = 9.37221[T] (400[MHz])
X_Acq_Duration = 2.1889024[s]
X_Domain       = 1H
X_Freq        = 399.03472754[MHz]
X_Offset      = 5.0[ppm]
X_Points      = 16384
X_Prescans    = 1
X_Resolution  = 0.45684997[Hz]
X_Sweep       = 7.48502994[kHz]
X_Sweep_Clipped = 5.98802395[kHz]
Irr_Domain    = Proton
Irr_Freq     = 399.03472754[MHz]
Irr_Offset   = 5.0[ppm]
Tri_Domain    = Proton
Tri_Freq     = 399.03472754[MHz]
Tri_Offset   = 5.0[ppm]
Clipped      = FALSE
Scans        = 8
Total_Scans  = 8

Relaxation_Delay = 5[s]
Recvr_Gain       = 48
Temp_Get         = 22.3[dc]
X_90_Width      = 6.6[na]
X_Acq_Time      = 2.1889024[s]
X_Angle         = 45[deg]
X_Atn           = 1[db]
X_Pulse         = 3.3[us]
Irr_Mode        = Off
Tri_Mode        = Off
Dante_Presat    = FALSE
Initial_Wait    = 1[s]
Repetition_Time = 7.1889024[s]

```

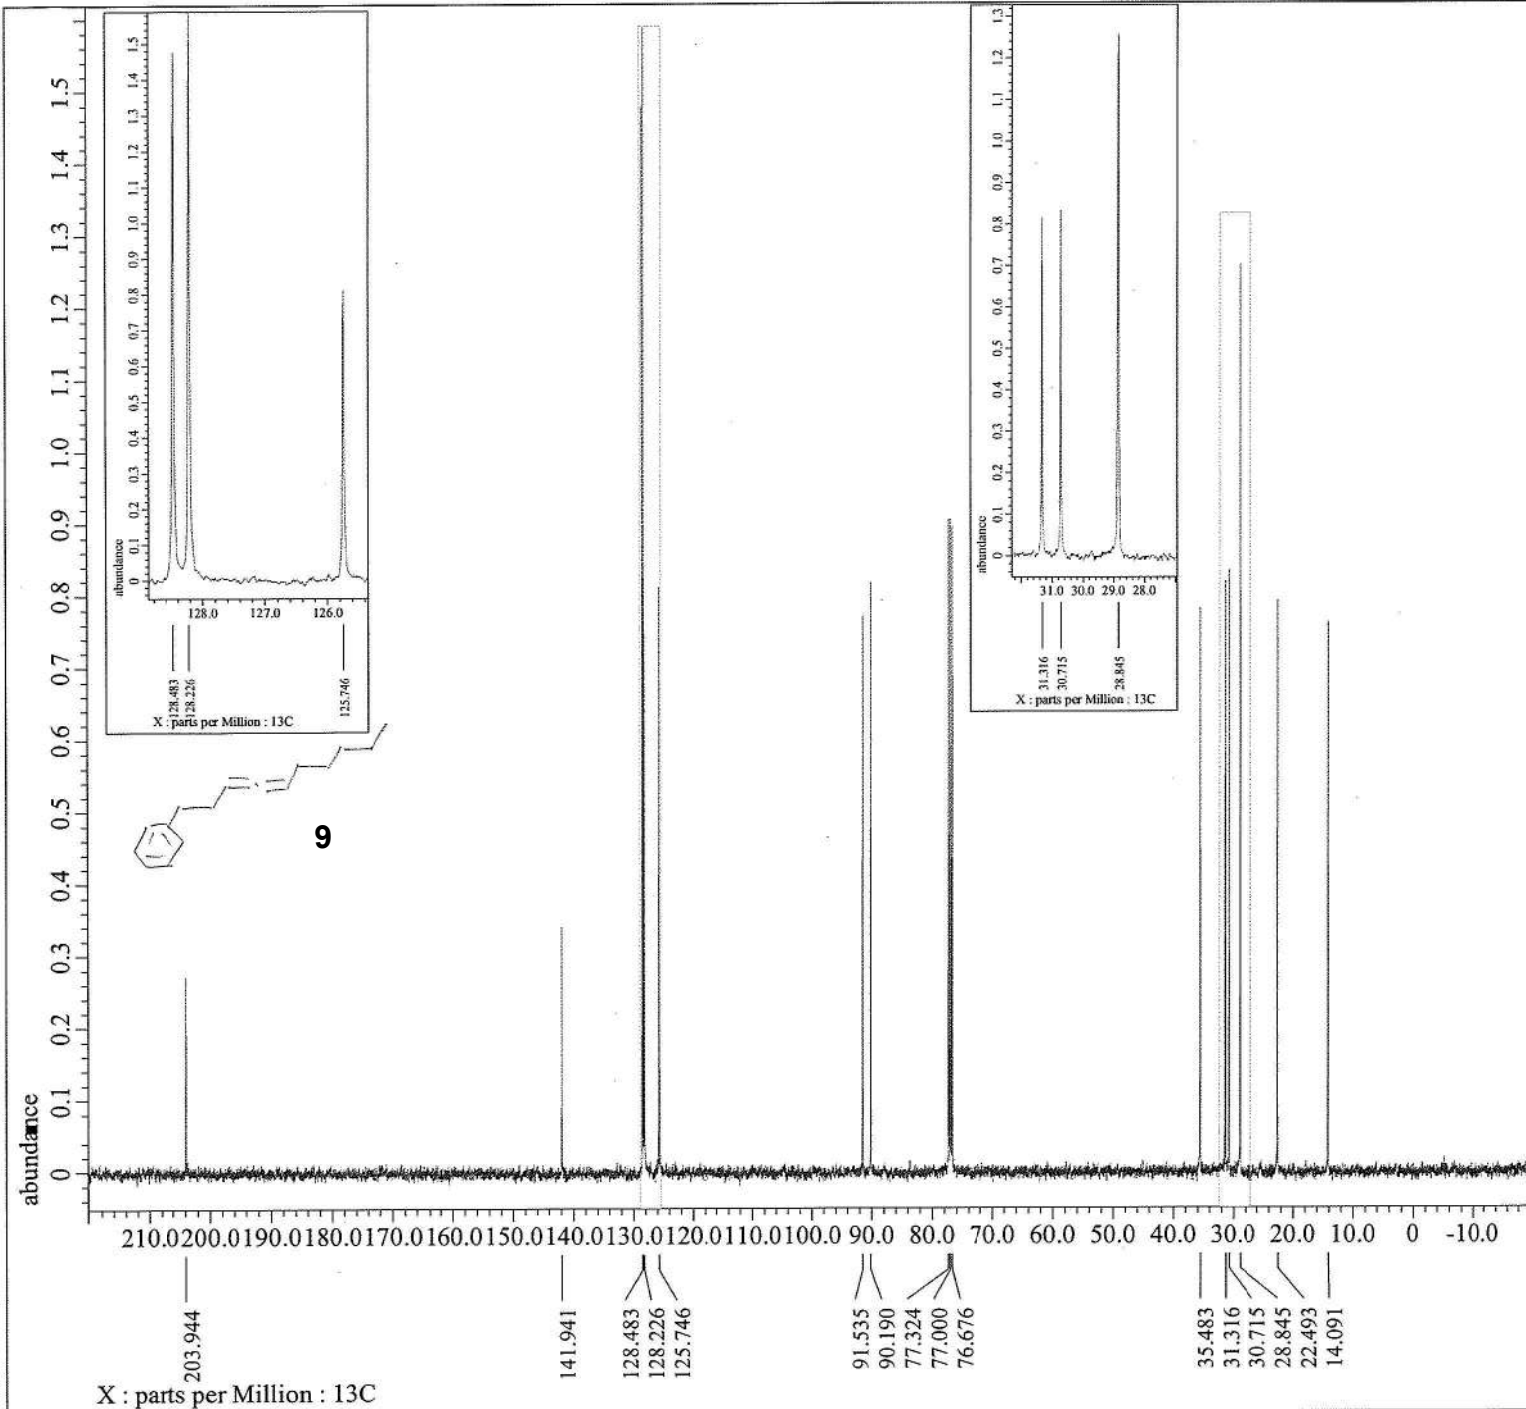

```

----- PROCESSING PARAMETERS -----
dc_balance( 0, FALSE )
sexp( 2.0[Hz], 0.0[s] )
trapezoid3( 0[%], 80[%], 100[%] )
zerofill( 1 )
fft( 1, TRUE, TRUE )
machinephase
ppm

Derived from: KRY-154 pure C-1.jdf

Filename      = KRY-154 pure C-2.jdf
Author       = element
Experiment   = single_pulse_dec
Sample_Id    = S#451899
Solvent      = CHLOROFORM-D
Actual_Start Time = 28-JUL-2021 19:29:34
Revision_Time = 7-FEB-2022 09:44:22

Comment      = single pulse decoupled ga
Data_Format  = 1D COMPLEX
Dim_Size     = 26214
X_Domain     = 13C
Dim_Title    = 13C
Dim_Units    = [ppm]
Dimensions   = X
Site         = ECS 400
Spectrometer = JNM-ECS400

Field_Strength = 9.20197068[T] (390[MHz])
X_Acq_Duration = 1.06430464[s]
X_Domain       = 13C
X_Freq        = 98.51479726[MHz]
X_Offset      = 100[ppm]
X_Points      = 32768
X_Prescans    = 4
X_Resolution  = 0.93958061[Hz]
X_Sweep       = 30.78817734[kHz]
Irr_Domain    = 1H
Irr_Freq      = 391.78655441[MHz]
Irr_Offset    = 5[ppm]
Clipped       = FALSE
Scans         = 200
Total_Scans   = 200

Relaxation_Delay = 2[s]
Recvr_Gain       = 60
Temp_Get         = 23[dC]
X_90_Width      = 8.7[us]
X_Acq_Time      = 1.06430464[s]
X_Angle         = 30[deg]
X_Atn           = 4.9[dB]
Y_Pulse         = ? 9[ns]
Irr_Atn_Dec     = 22.45[dB]
Irr_Atn_Noise  = 22.45[dB]
Irr_Noise       = WALTZ
Decoupling      = TRUE
Initial_Wait    = 1[s]
Noe             = TRUE
Noe_Time        = 2[s]
Repetition_Time = 3.06430464[s]

```

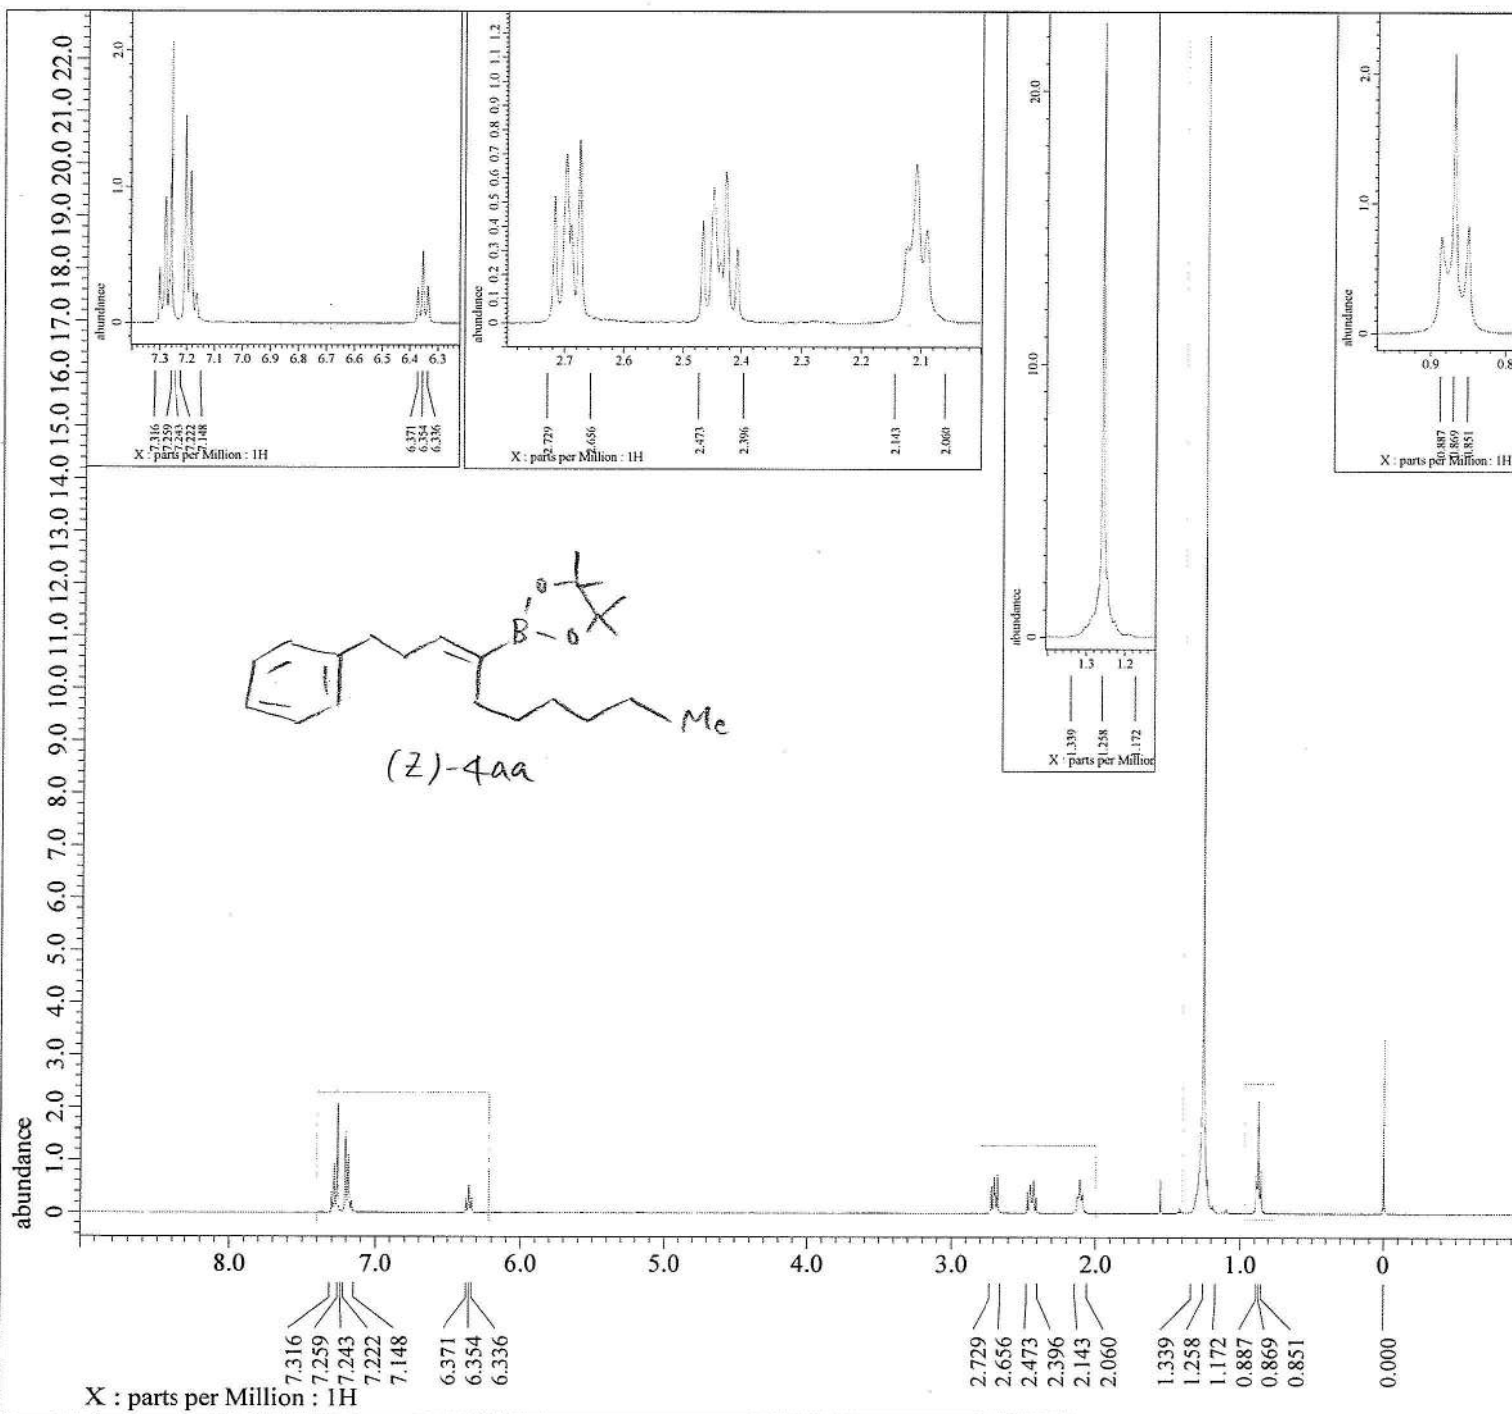

```

---- PROCESSING PARAMETERS ----
dc_balance( 0, FALSE )
sexp( 0.2[Hz], 0.0[s] )
trapezoid3( 0[%], 80[%], 100[%] )
zerofill( 1, TRUE )
fft( 1, TRUE, TRUE )
machinephase
ppm
Derived from: EDK-406 pure 1H-1.jdf

```

```

Filename      = EDK-406 pure 1H-2.jdf
Author       = element
Experiment    = single pulse.ex2
Sample_Id    = S#657748
Solvent      = CHLOROFORM-D
Actual_Start_Time = 28-MAR-2020 01:30:04
Revision_Time  = 16-JAN-2022 13:40:23

```

```

Comment      = single_pulse
Data Format   = 1D COMPLEX
Dim_Size     = 13107
X_Domain     = 1H
Dim_Title    = 1H
Dim_Units    = [ppm]
Dimensions   = X
Site         = ECS 400
Spectrometer = JNM-ECS400

```

```

Field Strength = 9.20197068[T] (390[MHz])
X_Acq_Duration = 2.228224[s]
X_Domain       = 1H
X_Freq         = 391.78655441[MHz]
X_Offset       = 5[ppm]
X_Points       = 16384
X_Prescans     = 1
X_Resolution   = 0.44878791[Hz]
X_Sweep        = 7.35294118[kHz]
Irr_Domain     = 1H
Irr_Freq       = 391.78655441[MHz]
Irr_Offset     = 5[ppm]
Tri_Domain     = 1H
Tri_Freq       = 391.78655441[MHz]
Tri_Offset     = 5[ppm]
Clipped        = FALSE
Scans          = 8
Total_Scans    = 8

```

```

Relaxation_Delay = 5[s]
Recvr_Gain       = 42
Temp_Get         = 20.5[dc]
X_90_Width       = 11.04[us]
X_Acq_Time       = 2.228224[s]
X_Angle          = 45[deg]
X_Atn            = 1.9[db]
X_Pulse          = 5.52[us]
Irr_Mode         = Off
Tri_Mode         = Off
Dante_Preset    = FALSE
Initial_Wait     = 1[s]
Repetition_Time  = 7.228224[s]

```

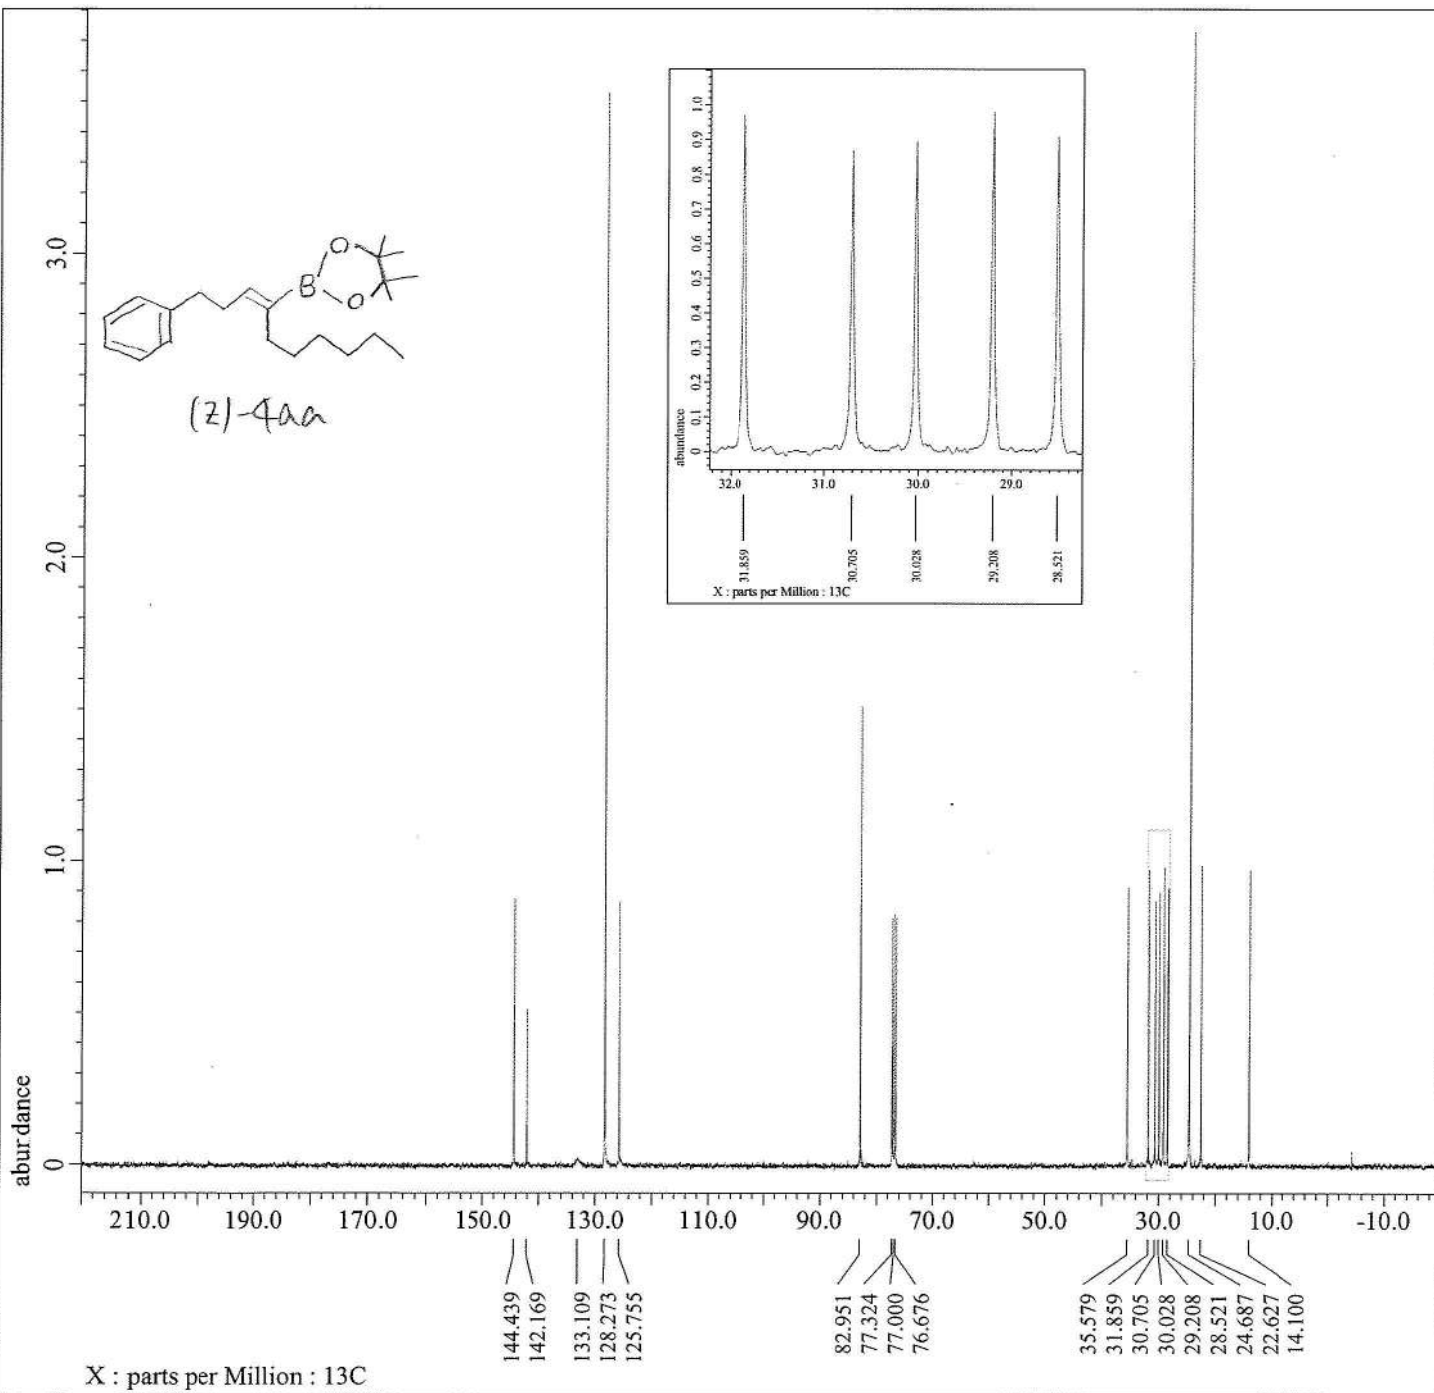

----- PROCESSING PARAMETERS -----  
 dc\_balance( 0, FALSE )  
 sexp( 2.0[Hz], 0.0[s] )  
 trapezoid3( 0[%], 80[%], 100[%] )  
 zerofill( 1 )  
 fft( 1, TRUE, TRUE )  
 machinephase  
 ppm  
 Derived from: EDK-406 pure 13C-1.jdf

Filename = EDK-406 pure 13C-2.jdf  
 Author = element  
 Experiment = single\_pulse\_dec  
 Sample\_Id = S#669201  
 Solvent = CHLOROFORM-D  
 Actual\_Start\_Time = 28-MAR-2020 01:47:53  
 Revision\_Time = 27-MAR-2020 19:36:10

Comment = single pulse decoupled  
 Data\_Format = 1D COMPLEX  
 Dim\_Size = 26214  
 X\_Domain = 13C  
 Dim\_Title = 13C  
 Dim\_Units = [ppm]  
 Dimensions = X  
 Site = ECS 400  
 Spectrometer = JNM-ECS400

Field Strength = 9.20197068[T] (390 [MHz])  
 X\_Acq\_Duration = 1.06430464[s]  
 X\_Domain = 13C  
 X\_Freq = 98.51479726 [MHz]  
 X\_Offset = 100 [ppm]  
 X\_Points = 32768  
 X\_Prescans = 4  
 X\_Resolution = 0.93958061 [Hz]  
 X\_Sweep = 30.78817734 [kHz]  
 Irr\_Domain = 1H  
 Irr\_Freq = 391.78655441 [MHz]  
 Irr\_Offset = 5 [ppm]  
 Clipped = FALSE  
 Scans = 200  
 Total\_Scans = 200

Relaxation\_Delay = 2 [s]  
 Recvr\_Gain = 60  
 Temp\_Get = 20.7 [dC]  
 X\_90\_Width = 9.11 [us]  
 X\_Acq\_Time = 1.06430464 [s]  
 X\_Angle = 30 [deg]  
 X\_Atn = 4.9 [dB]  
 X\_Pulse = 3.03666667 [us]  
 Irr\_Atn\_Dec = 22.255 [dB]  
 Irr\_Atn\_Noise = 22.255 [dB]  
 Irr\_Noise = WALTZ  
 Decoupling = TRUE  
 Initial\_Wait = 1 [s]

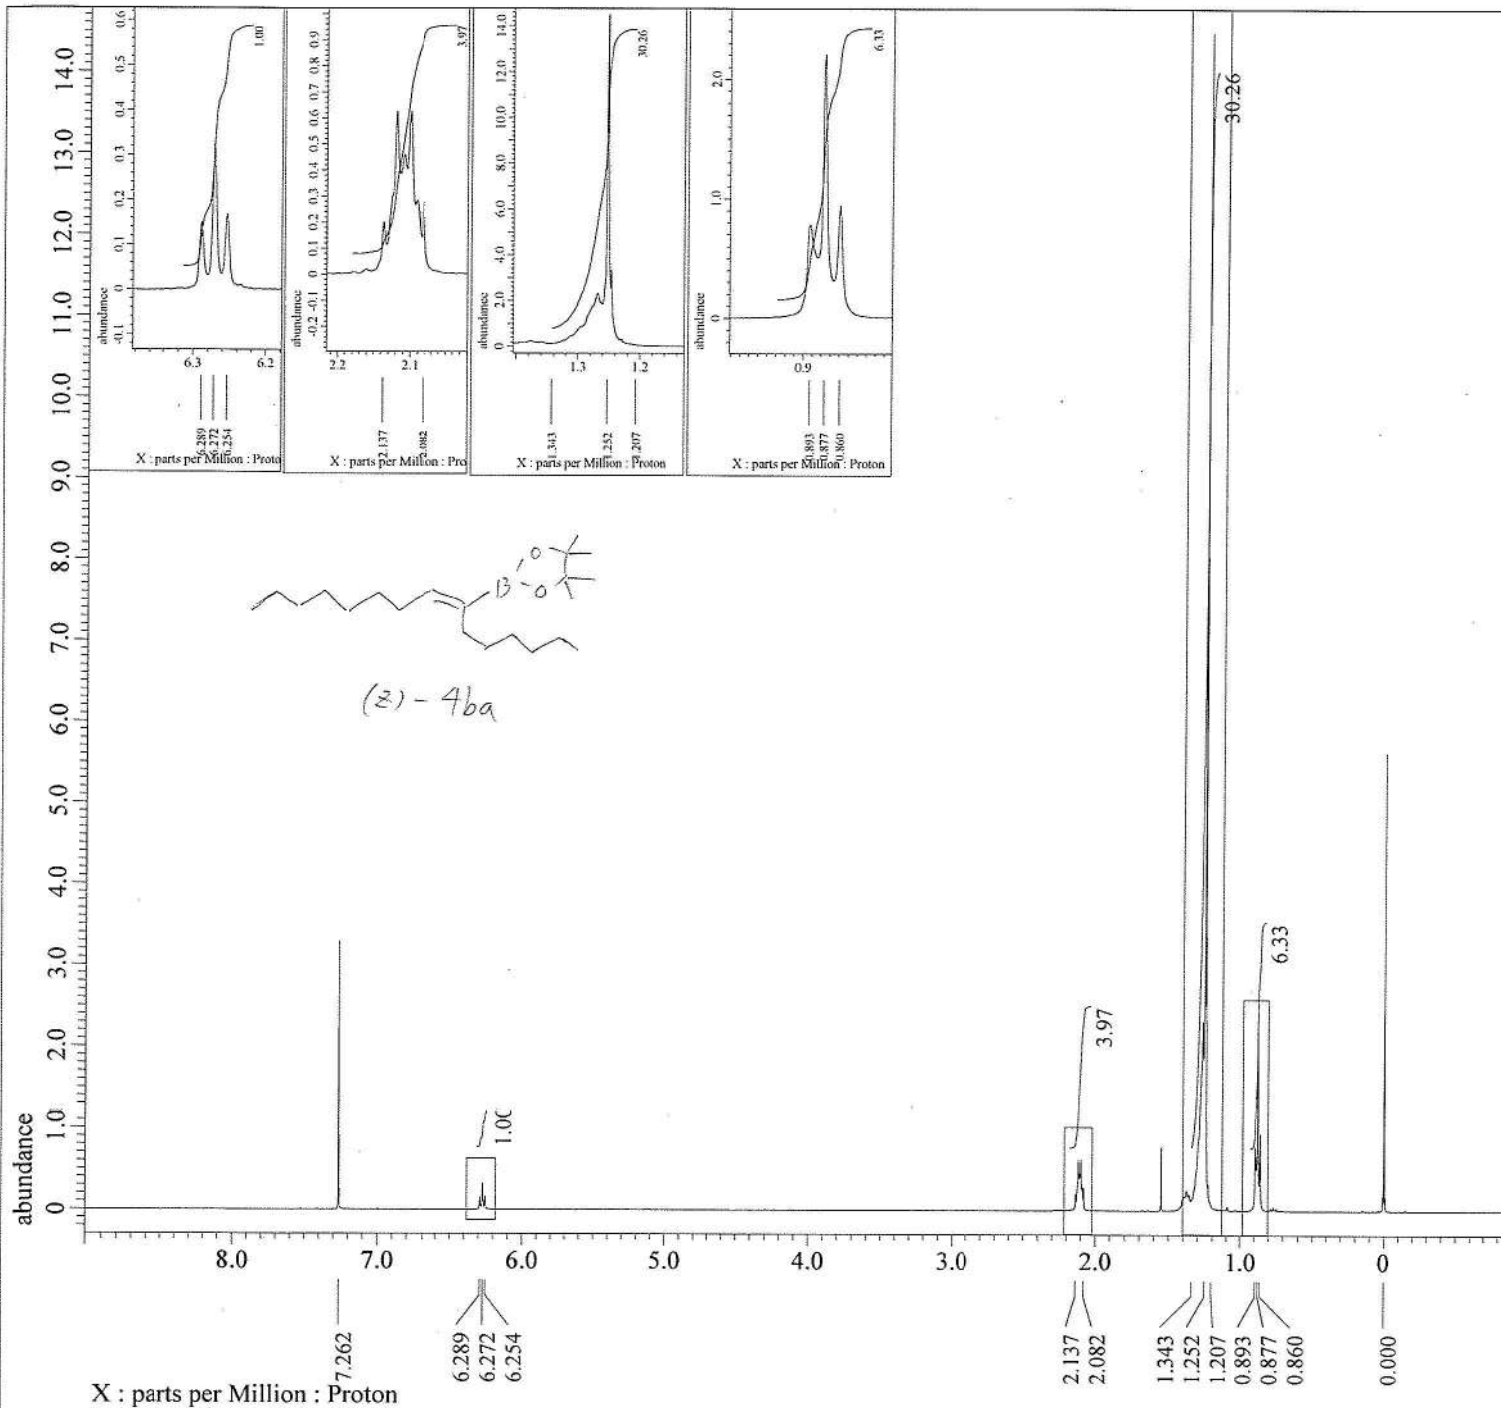

```

---- PROCESSING PARAMETERS ----
dc_balance( 0, FALSE )
sexp( 0.2[Hz], 0.0[s] )
trapezoid( 0[%], 0[%], 80[%], 100[%] )
zerofill( 1 )
fft( 1, TRUE, TRUE )
machinephase
ppm

Derived from: C7 C-B 10 mol% 34_Proton-1-1.jd

```

```

Filename      = C7 C-B 10 mol% 34_Proton-
Author       = element
Experiment    = proton.jxp
Sample_Id    = C7 C-B 10 mol% 34
Solvent      = CHLOROFORM-D
Actual_Start_Time = 12-OCT-2021 14:38:43
Revision_Time  = 14-APR-2023 20:13:22

```

```

Comment      = single_pulse
Data_Format  = 1D_COMPLEX
Dim_Size     = 13107
X_Domain    = Proton
Dim_Title   = Proton
Dim_Units   = [ppm]
Dimensions  = X
Spectrometer = DELTA2_NMR

```

```

Field_Strength = 9.4073814[T] (400[MHz])
X_Acq_Duration = 2.18103808[s]
X_Domain      = 1H
X_Freq       = 400.53219825[MHz]
X_Offset     = 5[ppm]
X_Points     = 16384
X_Prescans   = 1
X_Resolution = 0.45849727[Hz]
X_Sweep      = 7.51201923[kHz]
X_Sweep_Clippped = 6.00961538[kHz]
Irr_Domain   = Proton
Irr_Freq    = 400.53219825[MHz]
Irr_Offset  = 5[ppm]
Tri_Domain  = Proton
Tri_Freq   = 400.53219825[MHz]
Tri_Offset  = 5[ppm]
Clipped     = FALSE
Scans       = 8
Total_Scans = 8

```

```

Relaxation_Delay = 5[s]
Recvr_Gain       = 44
Temp_Get        = 18.9[dc]
X_90_Width     = 6[us]
X_Acq_Time     = 2.18103808[s]
X_Angle        = 45[deg]
X_Atn          = 0.8[db]
X_Pulse        = 3[us]
Irr_Mode       = Off
Tri_Mode       = Off
Dante_Presat   = FALSE
Initial_Wait   = 1[s]
Repetition_Time = 7.18103808[s]

```

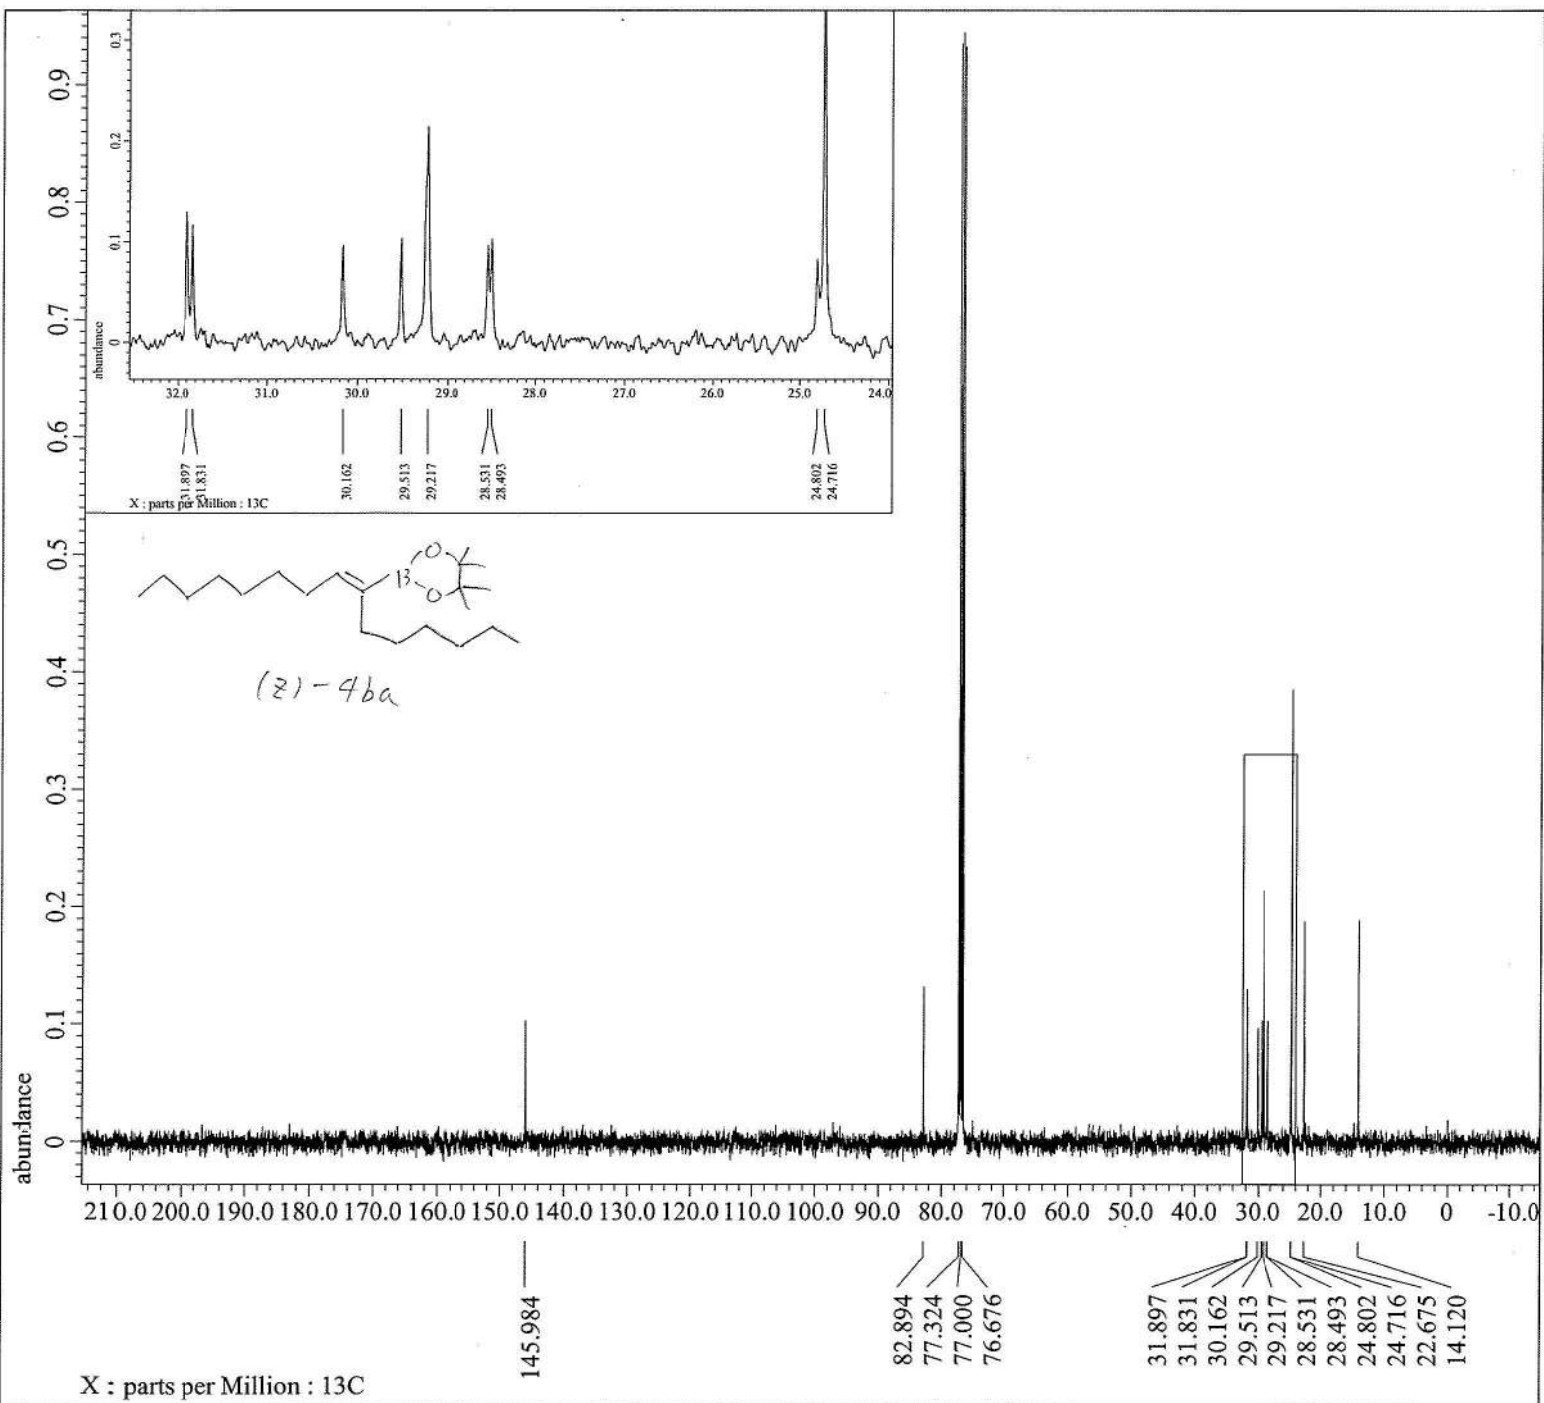

```

---- PROCESSING PARAMETERS ----
dc_balance( 0, FALSE )
sexp( 2.0[Hz], 0.0[s] )
trapezoid3( 0[%], 80[%], 100[%] )
zerofill( 1 )
fft( 1, TRUE, TRUE )
machinephase
ppm

以下に由来: SRT 034 C7 C-B 13C-2.jdf

```

```

Filename      = SRT 034 C7 C-B 13C-4.jdf
Author       = element
Experiment    = single_pulse_dec
Sample_Id    = 1
Solvent      = CHLOROFORM-D
Actual_Start_Time = 16-OCT-2021 03:22:54
Revision_Time = 26-OCT-2021 14:34:00

```

```

Comment      = single pulse decoupled ga
Data_Format  = 1D COMPLEX
Dim_Size     = 26214
Dim_Title    = 13C
Dim_Units    = [ppm]
Dimensions   = X
Site         = ECS 400
Spectrometer = JNM-ECS400

```

```

Field_Strength = 9.20197068[T] (390[MHz])
X_Acq_Duration = 1.06430464[s]
X_Domain       = 13C
X_Freq         = 98.51479726[MHz]
X_Offset       = 100[ppm]
X_Points       = 32768
X_Prescans     = 4
X_Resolution   = 0.93958061[Hz]
X_Sweep        = 30.78817734[kHz]
Irr_Domain     = 1H
Irr_Freq       = 391.78655441[MHz]
Irr_Offset     = 5[ppm]
Clipped        = FALSE
Scans          = 200
Total_Scans    = 200

```

```

Relaxation_Delay = 2[s]
Recvr_Gain       = 60
Temp_Get         = 21.1[dC]
X_90_Width       = 8.7[us]
X_Acq_Time       = 1.06430464[s]
X_Angle          = 30[deg]
X_Atn            = 4.9[dB]
X_Pulse          = 2.9[us]
Irr_Atn_Dec      = 22.45[dB]
Irr_Atn_Noise   = 22.45[dB]
Irr_Noise        = WALTZ
Decoupling       = TRUE
Initial_Wait     = 1[s]
Noe              = TRUE
Noe_Time         = 2[s]
Repetition_Time  = 3.06430464[s]

```



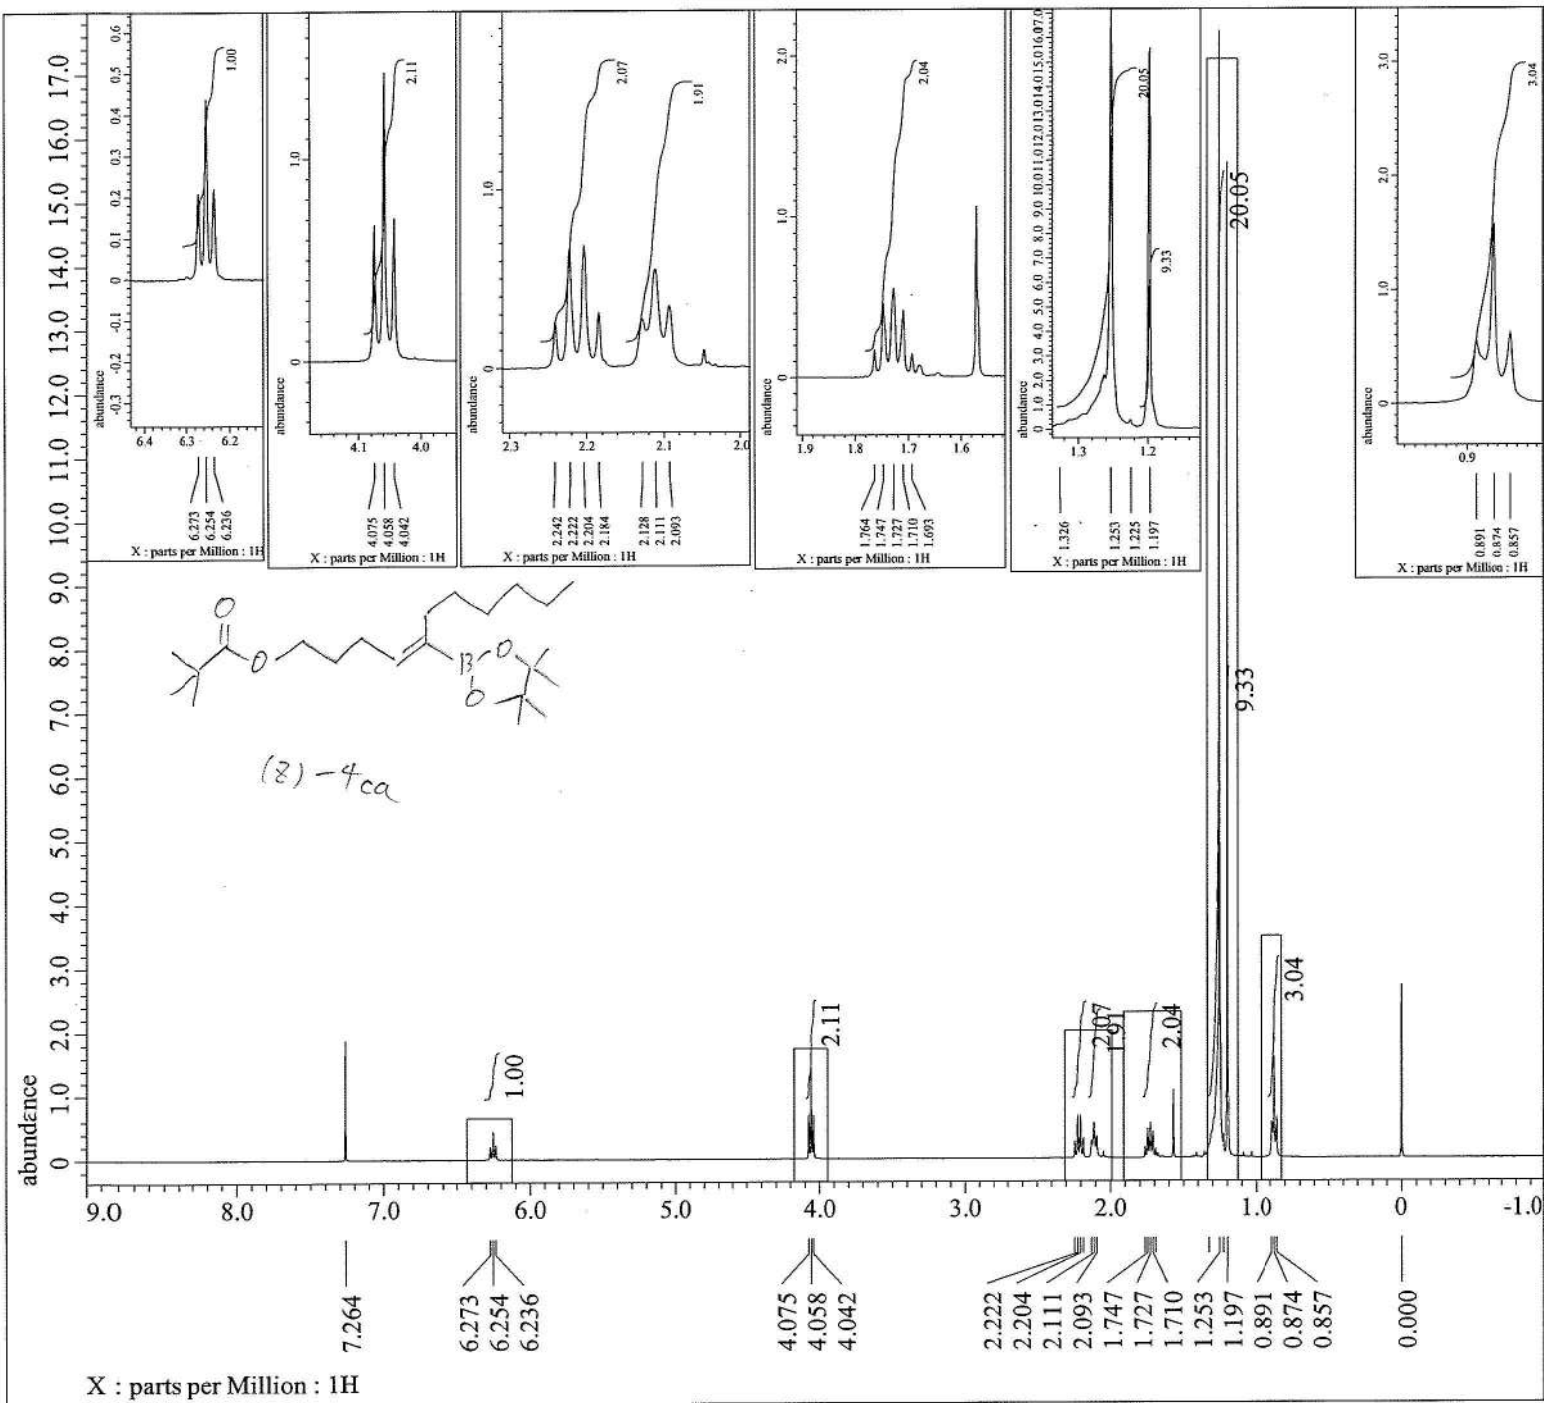

```

---- PROCESSING PARAMETERS ----
dc_balance( 0, FALSE )
sexp( 0.2[Hz], 0.0[s] )
trapezoid3( 0[%], 80[%], 100[%] )
zerofill( 1 )
fft( 1, TRUE, TRUE )
machinphase
ppm

以下に由来: SRT OPiv C-B column 2-2.jdf

```

```

Filename      = SRT OPiv C-B column 2-4.j
Author       = element
Experiment    = single_pulse.ex2
Sample_Id    = S#713567
Solvent      = CHLOROFORM-D
Actual_Start_Time = 8-JUL-2021 02:49:02
Revision_Time = 2-OCT-2021 15:56:49

Comment      = single_pulse
Data_Format  = 1D COMPLEX
Dim_Size     = 13107
Dim_Title    = 1H
Dim_Units    = [ppm]
Dimensions   = X
Site         = ECS 400
Spectrometer = JNM-ECS400

```

```

Field_Strength = 9.20197068[T] (390[MHz])
X_Acq_Duration = 2.228224[s]
X_Domain       = 1H
X_Freq         = 391.78655441[MHz]
X_Offset       = 5[ppm]
X_Points       = 16384
X_Prescans     = 1
X_Resolution   = 0.44878791[Hz]
X_Sweep        = 7.35294118[kHz]
Irr_Domain     = 1H
Irr_Freq       = 391.78655441[MHz]
Irr_Offset     = 5[ppm]
Tri_Domain     = 1H
Tri_Freq       = 391.78655441[MHz]
Tri_Offset     = 5[ppm]
Clipped        = FALSE
Scans          = 8
Total_Scans    = 8

```

```

Relaxation_Delay = 5[s]
Recvr_Gain       = 44
Temp_Get         = 19.7[dc]
X_90_Width       = 10.8[us]
X_Acq_Time       = 2.228224[s]
X_Angle          = 45[deg]
X_Atn            = 1.9[dB]
X_Pulse          = 5.4[us]
Irr_Mode         = Off
Tri_Mode         = Off
Dante_Presat    = FALSE
Initial_Wait     = 1[s]
Repetition_Time = 7.228224[s]

```

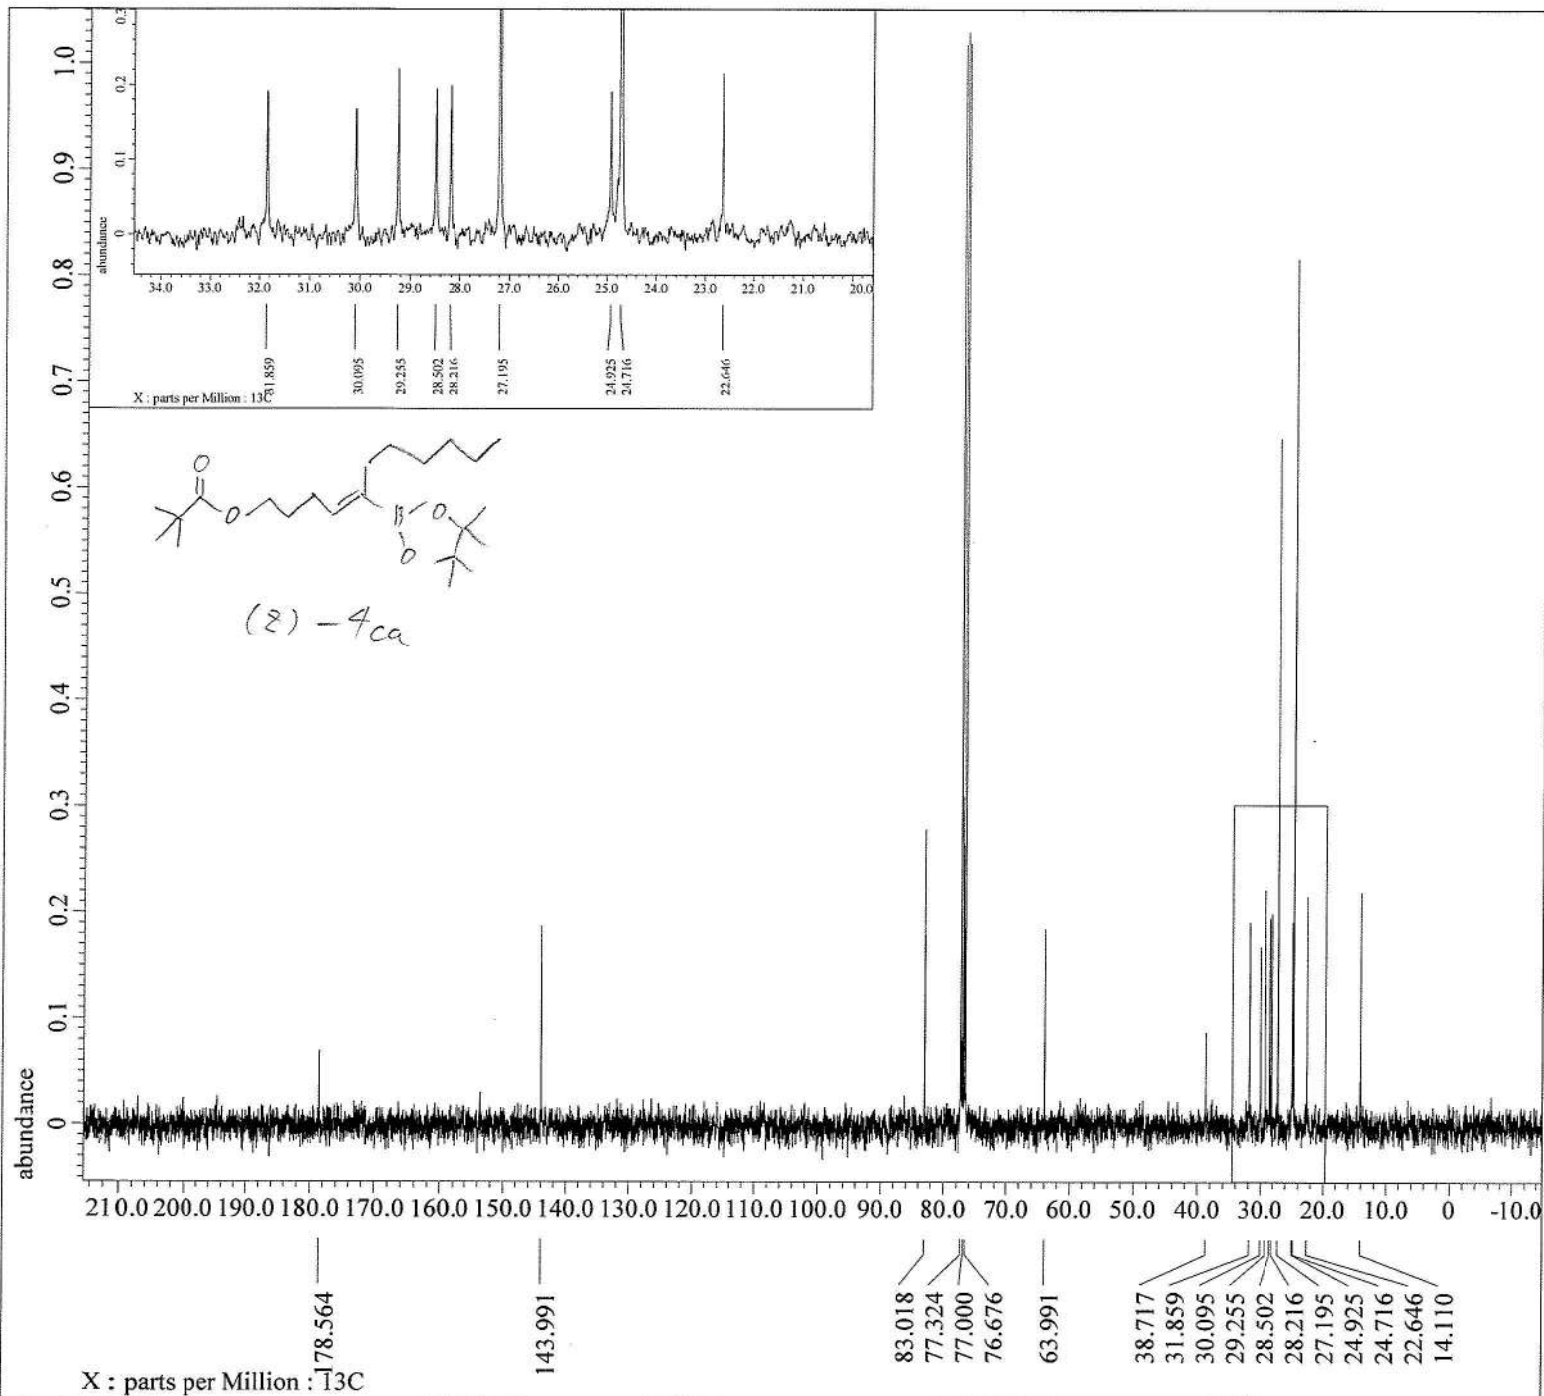

```

---- PROCESSING PARAMETERS ----
dc_balance( 0, FALSE )
sexp( 2.0[Hz], 0.0[s] )
trapezoid3( 0[%], 80[%], 100[%] )
zerofill( 1 )
fft( 1, TRUE, TRUE )
machinephase
ppm

以下に由来: SRT OPiv C-B 13C 3-2.jdf

```

```

Filename      = SRT OPiv C-B 13C 3-4.jdf
Author       = element
Experiment    = single_pulse_dec
Sample Id    = S#717002
Solvent      = CHLOROFORM-D
Actual_Start_Time = 9-JUL-2021 02:54:29
Revision_Time  = 8-JUL-2021 20:37:46

```

```

Comment      = single pulse decoupled ga
Data Format   = 1D_COMPLEX
Dim Size     = 26214
Dim Title    = 13C
Dim Units    = [ppm]
Dimensions   = X
Site         = ECS 400
Spectrometer = JNM-ECS400

```

```

Field Strength = 9.20197068[T] (390[MHz])
X_Acq_Duration = 1.06430464[s]
X_Domain       = 13C
X_Freq         = 98.51479726[MHz]
X_Offset       = 100[ppm]
X Points       = 32768
X_Prescans     = 4
X_Resolution   = 0.93958061[Hz]
X_Sweep        = 30.78817734[kHz]
Irr_Domain     = 1H
Irr_Freq       = 391.78655441[MHz]
Irr_Offset     = 5[ppm]
Clipped        = FALSE
Scans          = 64
Total_Scans    = 64

```

```

Relaxation_Delay = 2[s]
Recvr_Gain       = 60
Temp_Get         = 20.3[dC]
X_90_Width       = 8.7[us]
X_Acq_Time       = 1.06430464[s]
X_Angle          = 30[deg]
X_Atn            = 4.9[dB]
Y_Pulse         = 2.0[us]
Irr_Atn_Dec      = 22.45[dB]
Irr_Atn_Noe     = 22.45[dB]
Irr_Noise        = WALTZ
Decoupling       = TRUE
Initial_Wait     = 1[s]
Noe              = TRUE
Noe_Time         = 2[s]
Repetition_Time  = 3.06430464[s]

```

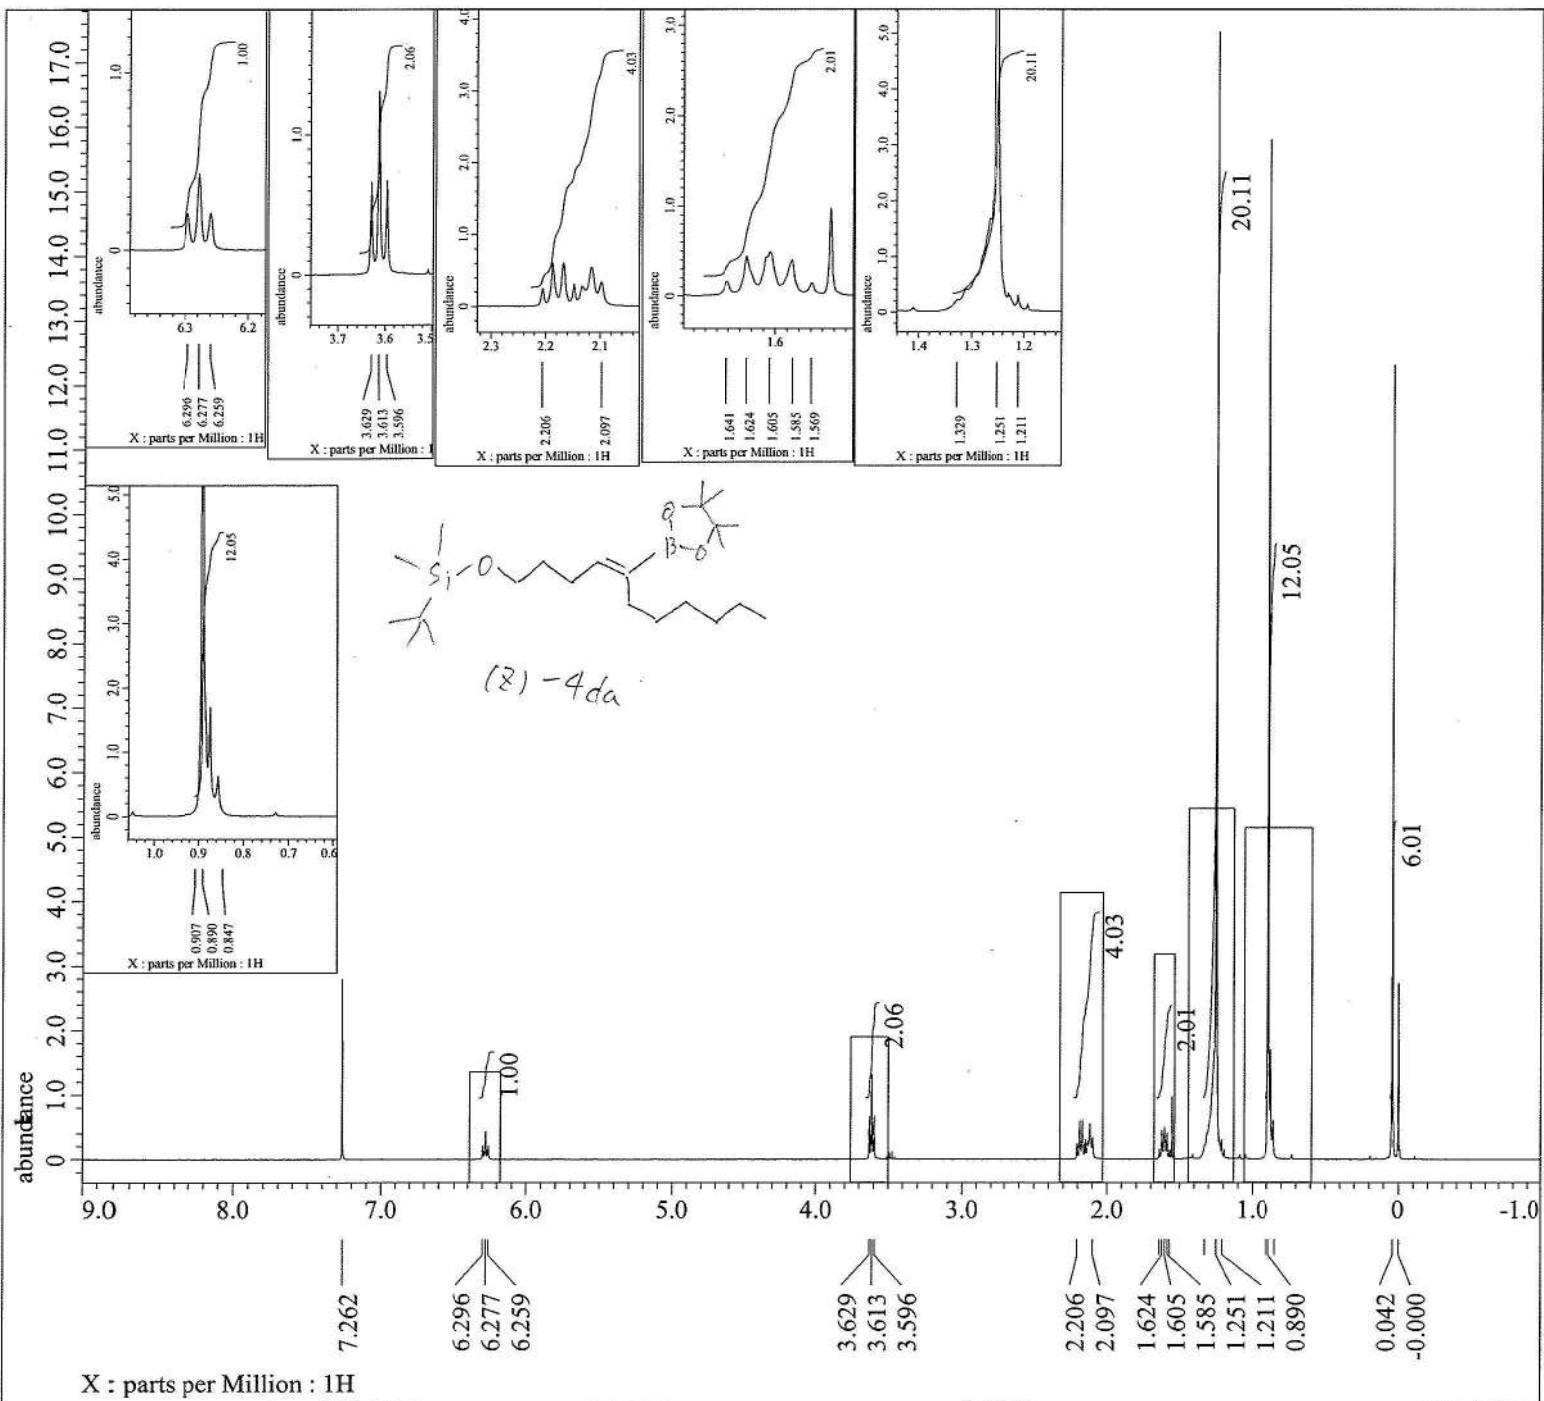

```

---- PROCESSING PARAMETERS ----
dc_balance( 0, FALSE )
sexp( 0.2[Hz], 0.0[s] )
trapezoid3( 0[%], 80[%], 100[%] )
zerofill( 1 )
fft( 1, TRUE, TRUE )
machinephase
ppm

以下に由来: SRT 070 OTBS C-B cat10mol%-2.jdf

```

```

Filename      = SRT 070 OTBS C-B cat10mol
Author       = element
Experiment    = single_pulse.ex2
Sample_Id    = S#803951
Solvent      = CHLOROFORM-D
Actual_Start_Time = 28-MAY-2021 05:02:35
Revision_Time  = 8-SEP-2021 12:52:55

```

```

Comment      = single_pulse
Data Format   = 1D COMPLEX
Dim Size     = 13107
Dim Title    = 1H
Dim Units    = [ppm]
Dimensions   = X
Site        = ECS 400
Spectrometer = JNM-ECS400

```

```

Field Strength = 9.20197068[T] (390[MHz])
X_Acq_Duration = 2.228224[s]
X_Domain      = 1H
X_Freq        = 391.78655441[MHz]
X_Offset      = 5[ppm]
X_Points      = 16384
X_Prescans    = 1
X_Resolution  = 0.44878791[Hz]
X_Sweep       = 7.35294118[kHz]
Irr_Domain    = 1H
Irr_Freq      = 391.78655441[MHz]
Irr_Offset    = 5[ppm]
Tri_Domain    = 1H
Tri_Freq      = 391.78655441[MHz]
Tri_Offset    = 5[ppm]
Clipped       = FALSE
Scans         = 8
Total_Scans   = 8

```

```

Relaxation_Delay = 5[s]
Recvr_Gain       = 48
Temp_Get         = 20.3[degC]
X_90_Width      = 10.8[us]
X_Acq_Time      = 2.228224[s]
X_Angle         = 45[deg]
X_Atn           = 1.9[dB]
X_Pulse         = 5.4[us]
Irr_Mode        = Off
Tri_Mode        = Off
Dante_Presat    = FALSE
Initial_Wait    = 1[s]
Repetition_Time = 7.228224[s]

```

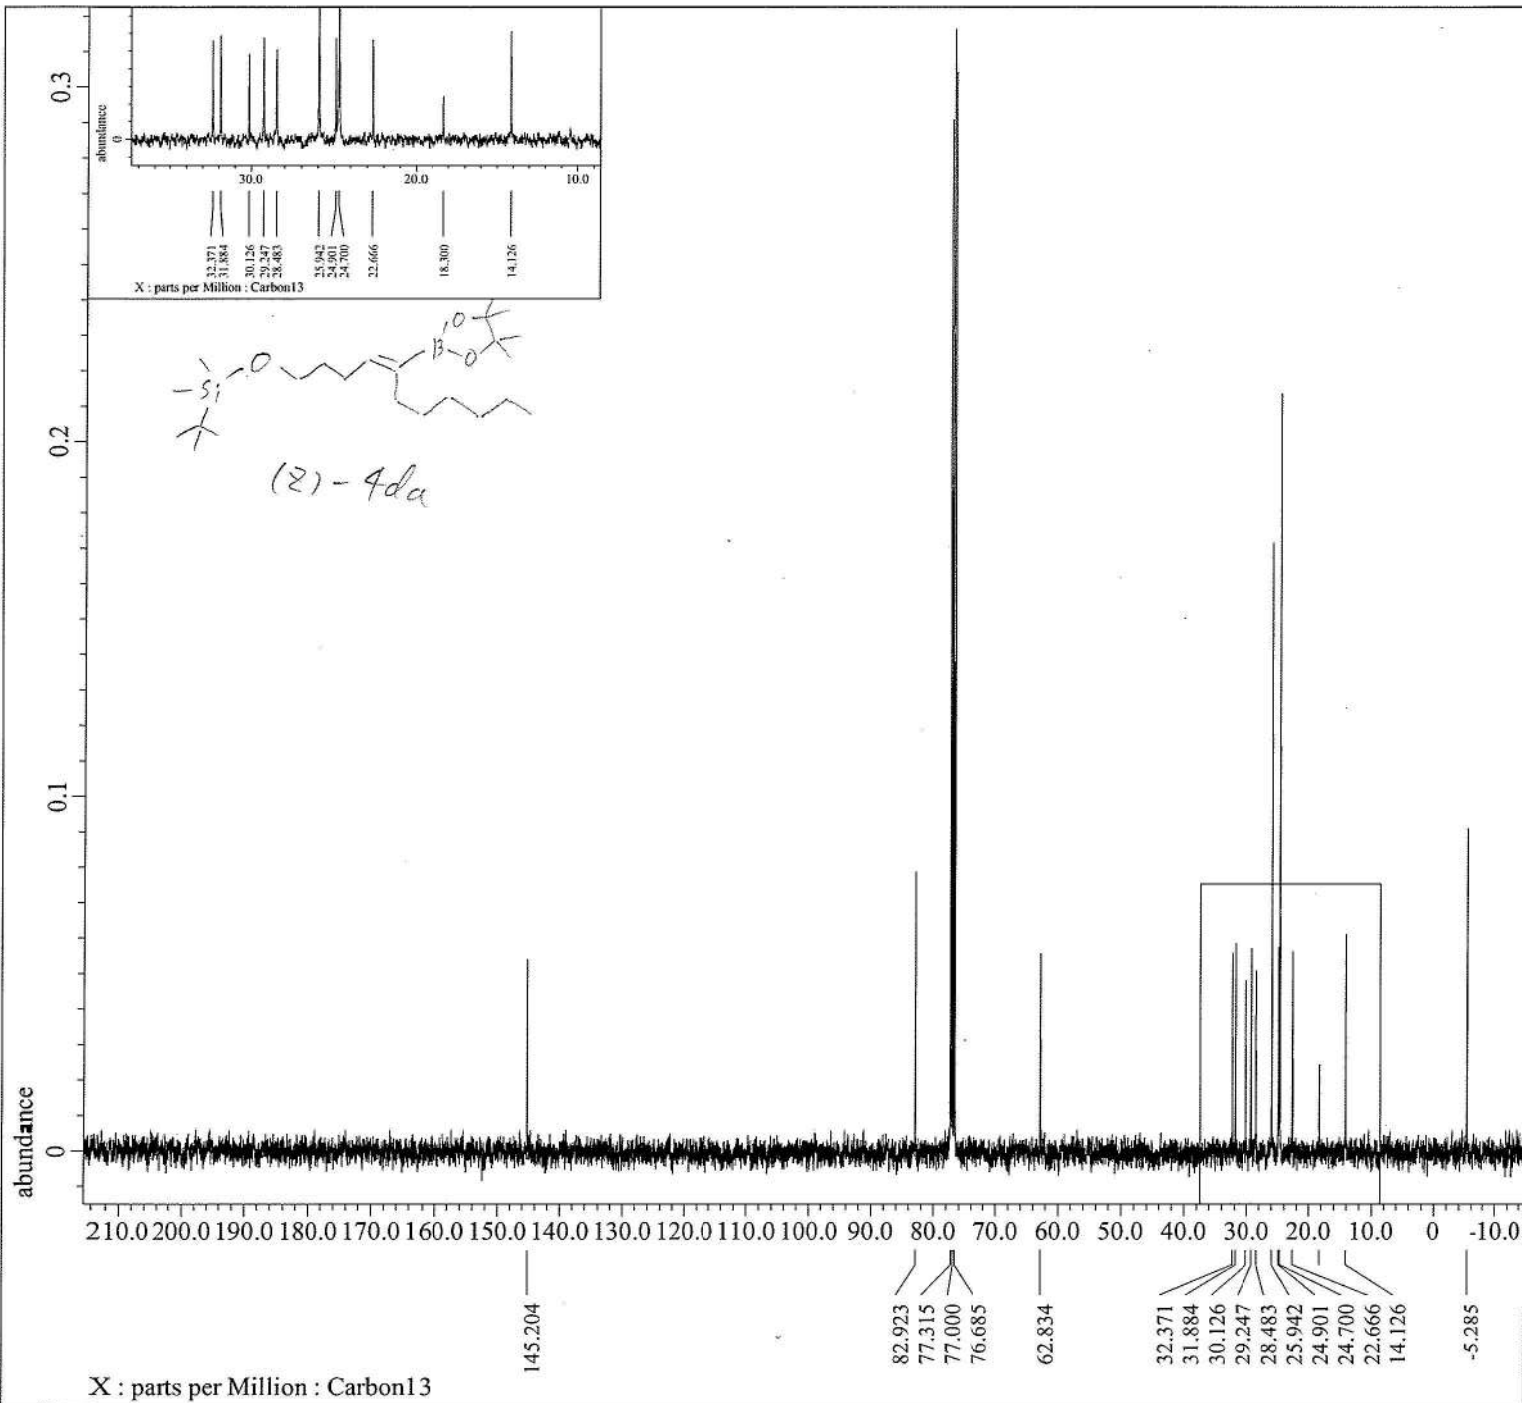

----- PROCESSING PARAMETERS -----  
 dc\_balance( 0, FALSE )  
 sexp( 2.0[Hz], 0.0[s] )  
 trapezoid( 0[%], 0[%], 80[%], 100[%] )  
 zerofill( 1 )  
 fft( 1, TRUE, TRUE )  
 machinephase  
 ppm  
  
 Derived from: OTBS C-B 13C\_Carbon-1-1.jdf

---

Filename = OTBS C-B 13C\_Carbon-1-2.j  
 Author = element  
 Experiment = carbon.jxp  
 Sample\_Id = OTBS C-B 13C  
 Solvent = CHLOROFORM-D  
 Actual\_Start\_Time = 2-JUL-2021 15:45:09  
 Revision\_Time = 27-AUG-2021 10:46:17

---

Comment = single pulse decoupled ga  
 Data\_Format = 1D COMPLEX  
 Dim\_Size = 26214  
 X\_Domain = Carbon  
 Dim\_Title = Carbon13  
 Dim\_Units = [ppm]  
 Dimensions = X  
 Site = JNM-ECS400  
 Spectrometer = DELTA2\_NMR

---

Field\_Strength = 9.37221[T] (400[MHz])  
 X\_Acq\_Duration = 1.04333312[s]  
 X\_Domain = 13C  
 X\_Freq = 100.33735165[MHz]  
 X\_Offset = 100.0[ppm]  
 X\_Points = 32768  
 X\_Prescans = 4  
 X\_Resolution = 0.95846665[Hz]  
 X\_Sweep = 31.40703518[kHz]  
 X\_Sweep\_Clipped = 25.12562814[kHz]  
 Irr\_Domain = Proton  
 Irr\_Freq = 399.03472754[MHz]  
 Irr\_Offset = 5.0[ppm]  
 Clipped = FALSE  
 Scans = 120  
 Total\_Scans = 120

---

Relaxation\_Delay = 2[s]  
 Recvr\_Gain = 50  
 Temp\_Get = 19.4[dC]  
 X\_90\_Width = 10.9[us]  
 X\_Acq\_Time = 1.04333312[s]  
 X\_Angle = 30[deg]  
 X\_Atn = 5.4[dB]  
 X\_Pulse = 3.63333333[us]  
 Irr\_Atn\_Dec = 25.823[dB]  
 Irr\_Atn\_Noie = 25.823[dB]  
 Irr\_Noise = WALTZ  
 Irr\_Pwidth = 0.115[ms]  
 Decoupling = TRUE

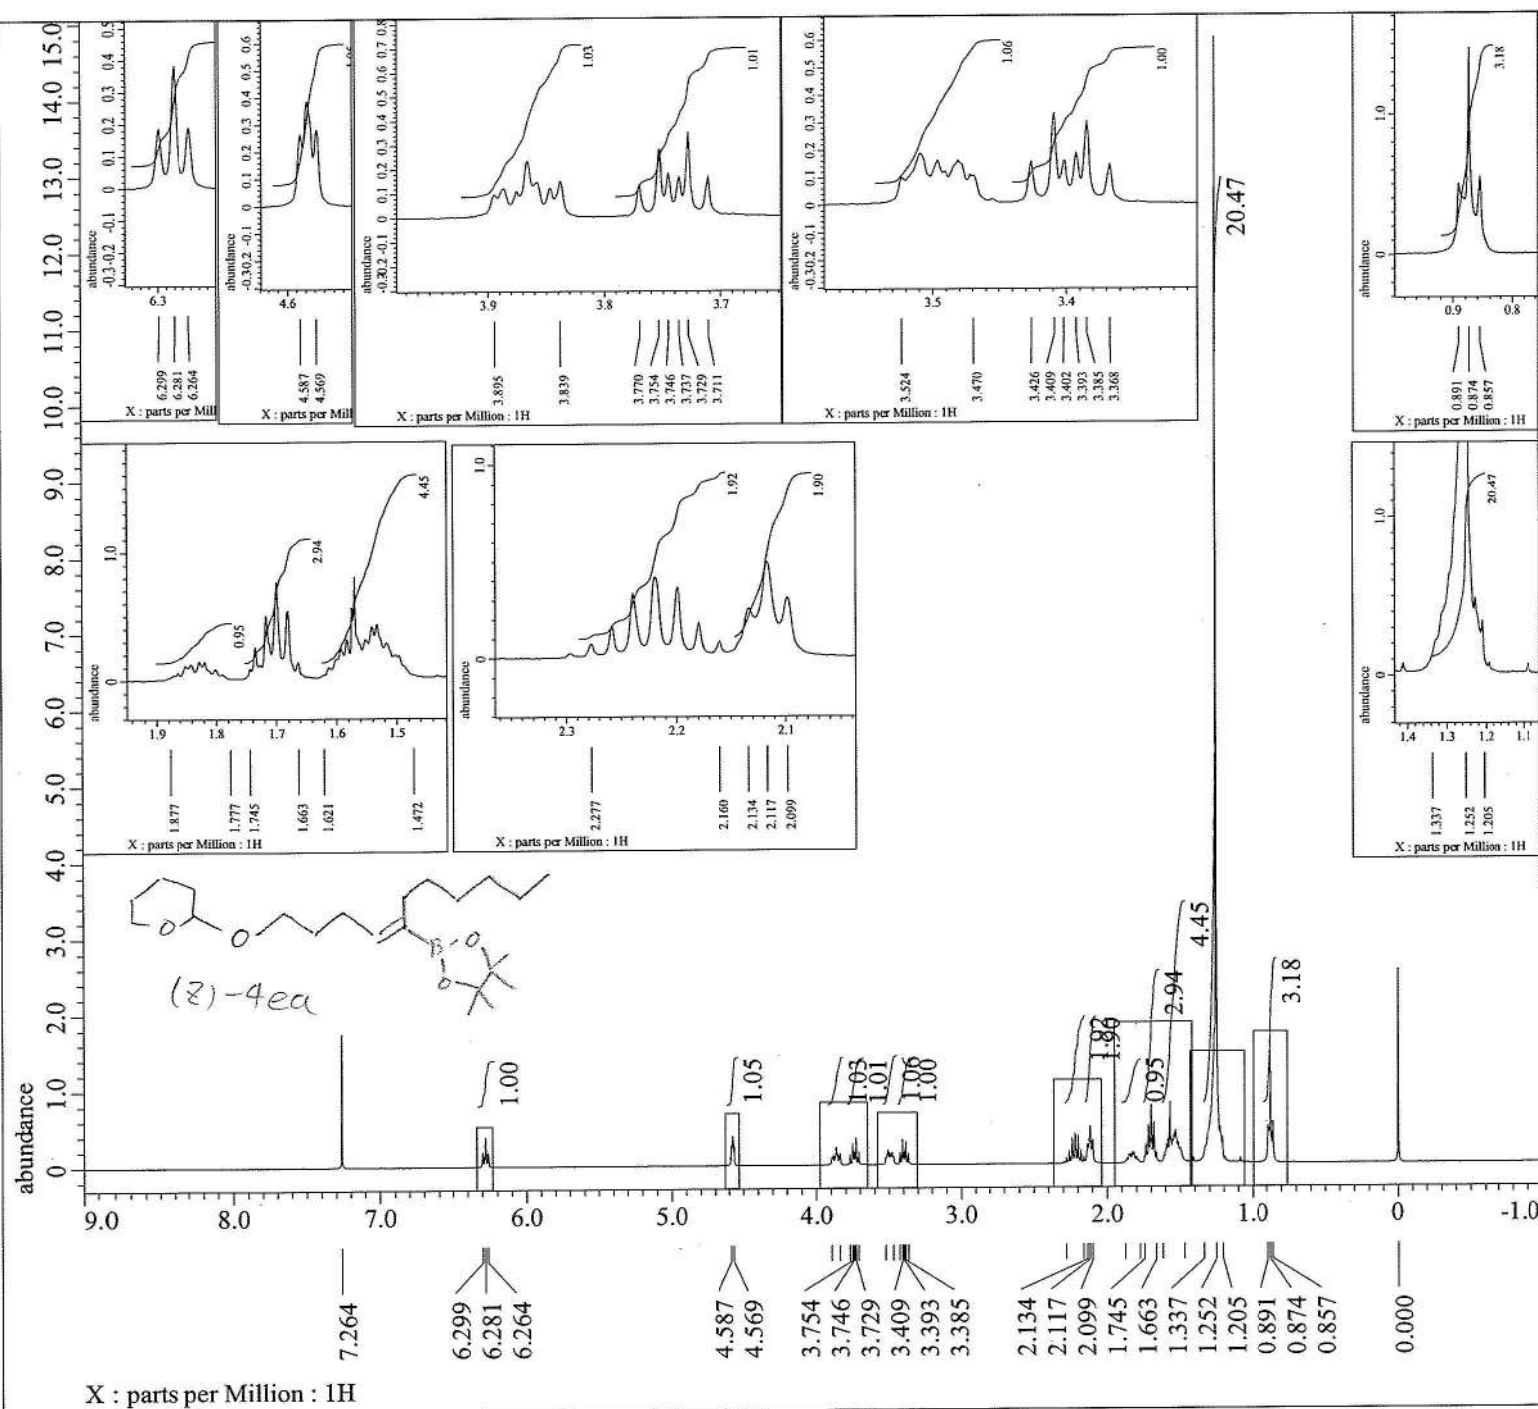

```

---- PROCESSING PARAMETERS ----
dc_balance( 0, FALSE )
sexp( 0.2[Hz], 0.0[s] )
trapezoid3( 0[%], 80[%], 100[%] )
zerofill( 1 )
fft( 1, TRUE, TRUE )
machinephase
ppm

```

以下に由来: OTHP C-B-2.jdf

```

Filename      = OTHP C-B-4.jdf
Author       = element
Experiment   = single_pulse.ex2
Sample_Id    = S#374386
Solvent      = CHLOROFORM-D
Actual_Start_Time = 2-JUL-2021 17:03:50
Revision_Time  = 2-OCT-2021 18:59:43

```

```

Comment      = single_pulse
Data_Format   = 1D COMPLEX
Dim_Size     = 13107
Dim_Title    = 1H
Dim_Units    = [ppm]
Dimensions   = X
Site         = ECS 400
Spectrometer = JNM-ECS400

```

```

Field_Strength = 9.20197068[T] (390[MHz])
X_Acq_Duration = 2.228224[s]
X_Domain      = 1H
X_Freq        = 391.78655441[MHz]
X_Offset      = 5[ppm]
X_Points      = 16384
X_Prescans    = 1
X_Resolution  = 0.44878791[Hz]
X_Sweep       = 7.35294118[kHz]
Irr_Domain    = 1H
Irr_Freq      = 391.78655441[MHz]
Irr_Offset    = 5[ppm]
Tri_Domain    = 1H
Tri_Freq      = 391.78655441[MHz]
Tri_Offset    = 5[ppm]
Clipped       = FALSE
Scans         = 8
Total_Scans   = 8

```

```

Relaxation_Delay = 5[s]
Recvr_Gain       = 44
Temp_Get         = 19.6[dC]
X_90_Width      = 10.8[us]
X_Acq_Time      = 2.228224[s]
X_Angle         = 45[deg]
X_Atn           = 1.9[dB]
X_Pulse         = 5.4[us]
Irr_Mode        = Off
Tri_Mode        = Off
Dante_Presat    = FALSE
Initial_Wait    = 1[s]
Repetition_Time = 7.228224[s]

```

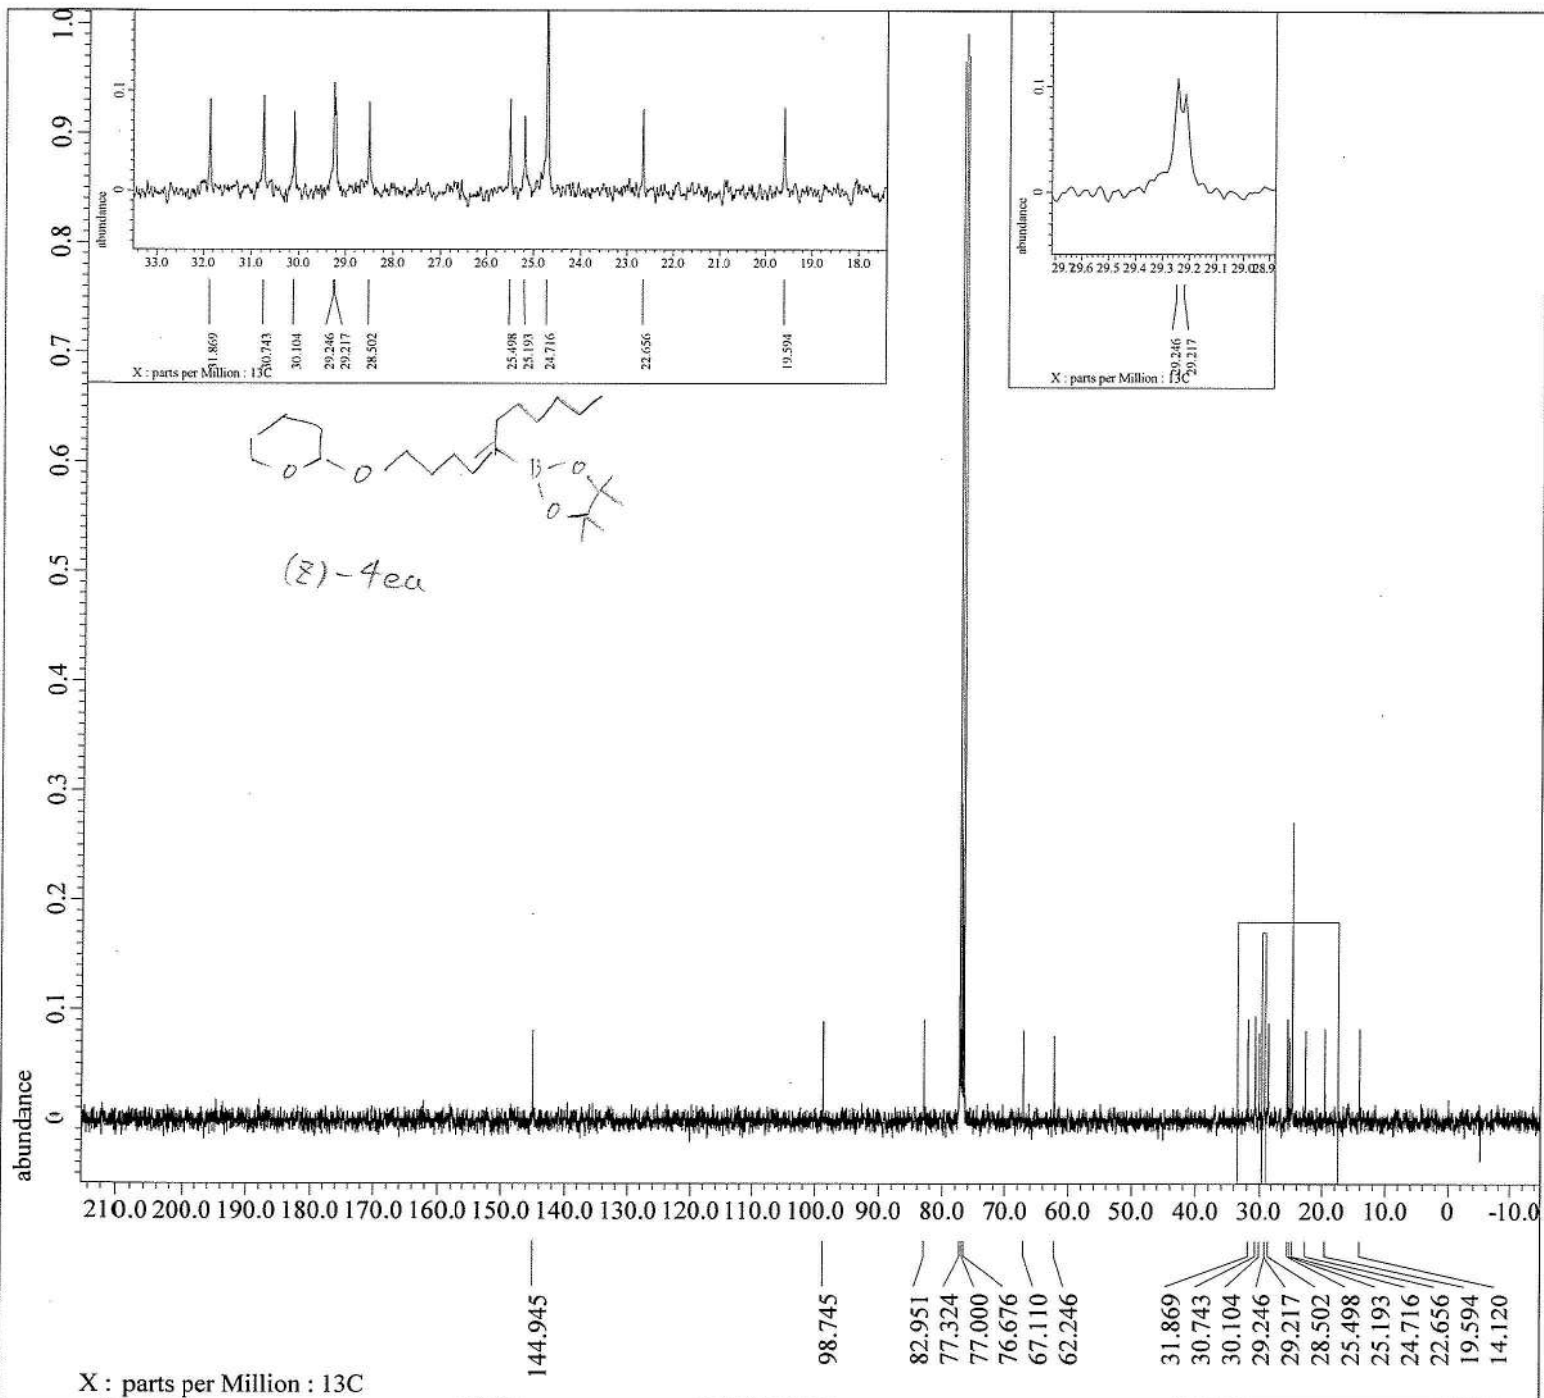

```

---- PROCESSING PARAMETERS ----
dc_balance( 0, FALSE )
sexp( 2.0[Hz], 0.0[s] )
trapezoid3( 0[%], 80[%], 100[%] )
zerofill( 1 )
fft( 1, TRUE, TRUE )
machinephase
ppm

以下に由来: SRT OTHP C-B 13C 3-2.jdf

```

```

Filename      = SRT OTHP C-B 13C 3-4.jdf
Author       = element
Experiment   = single_pulse_dec
Sample Id    = 1
Solvent      = CHLOROFORM-D
Actual_Start_Time = 9-JUL-2021 02:33:34
Revision_Time  = 8-JUL-2021 21:40:49

Comment      = single pulse decoupled ga
Data Format   = 1D COMPLEX
Dim Size     = 26214
Dim Title    = 13C
Dim Units    = [ppm]
Dimensions   = X
Site         = ECS 400
Spectrometer = JNM-ECS400

```

```

Field Strength = 9.20197068[T] (390[MHz])
X_Acq Duration = 1.06430464[s]
X_Domain       = 13C
X_Freq         = 98.51479726[MHz]
X_Offset       = 100[ppm]
X_Points       = 32768
X_Prescans     = 4
X_Resolution   = 0.93958061[Hz]
X_Sweep        = 30.78817734[kHz]
Irr_Domain     = 1H
Irr_Freq       = 391.78655441[MHz]
Irr_Offset     = 5[ppm]
Clipped        = FALSE
Scans          = 167
Total_Scans    = 167

```

```

Relaxation_Delay = 2[s]
Recvr Gain       = 60
Temp_Get         = 20.3[dC]
X_90_Width       = 8.7[us]
X_Acq Time       = 1.06430464[s]
X_Angle          = 30[deg]
X_Atn            = 4.9[dB]
Y_Pulse         = ? 0[us]
Irr_Atn Dec     = 22.45[dB]
Irr_Atn Noe     = 22.45[dB]
Irr_Noise       = WALTZ
Decoupling      = TRUE
Initial_Wait     = 1[s]
Noe              = TRUE
Noe_Time        = 2[s]
Repetition_Time = 3.06430464[s]

```

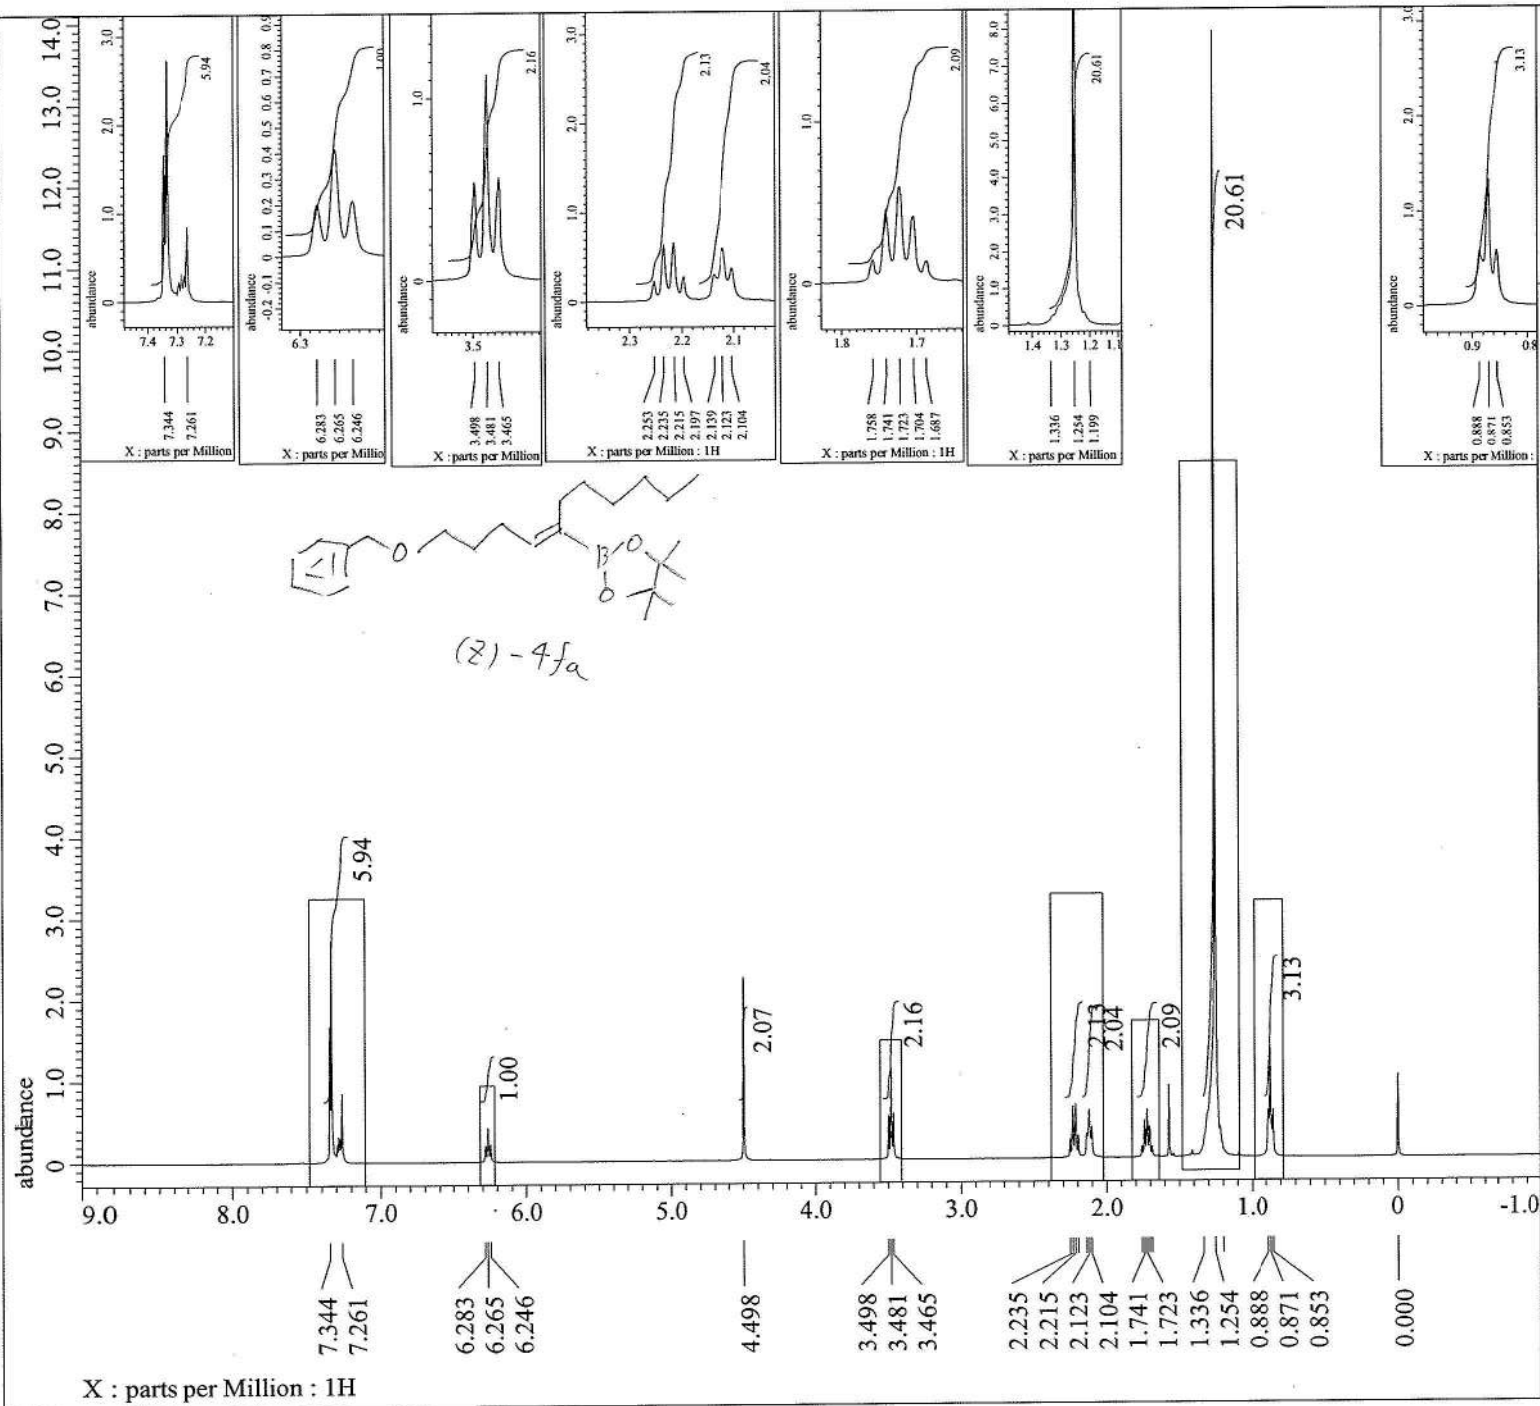

```

---- PROCESSING PARAMETERS ----
dc_balance( 0, FALSE )
sexp( 0.2[Hz], 0.0[s] )
trapezoid3( 0[%], 80[%], 100[%] )
zerofill( 1 )
fft( 1, TRUE, TRUE )
machinephase
ppm

以下に由来: SRT 030 OBn C-B column-2.jdf

Filename      = SRT 030 OBn C-B column-4.
Author        = element
Experiment     = single_pulse.ex2
Sample_Id     = S#663750
Solvent       = CHLOROFORM-D
Actual_Start_Time = 22-MAY-2021 01:10:03
Revision_Time  = 2-OCT-2021 16:50:41

Comment       = single_pulse
Data Format    = 1D COMPLEX
Dim_Size      = 13107
Dim_Title     = 1H
Dim_Units     = [ppm]
Dimensions    = X
Site          = ECS 400
Spectrometer  = JNM-ECS400

Field Strength = 9.20197068[T] (390[MHz])
X_Acq Duration = 2.228224[s]
X_Domain       = 1H
X_Freq         = 391.78655441[MHz]
X_Offset       = 5[ppm]
X_Points       = 16384
X_Prescans    = 1
X_Resolution  = 0.44878791[Hz]
X_Sweep        = 7.35294118[kHz]
Irr_Domain     = 1H
Irr_Freq       = 391.78655441[MHz]
Irr_Offset     = 5[ppm]
Tri_Domain     = 1H
Tri_Freq       = 391.78655441[MHz]
Tri_Offset     = 5[ppm]
Clipped        = FALSE
Scans          = 8
Total_Scans    = 8

Relaxation_Delay = 5[s]
Recvr Gain      = 42
Temp_Get        = 19.9[dC]
X_90_Width     = 10.8[us]
X_Acq Time     = 2.228224[s]
X_Angle        = 45[deg]
X_Atn          = 1.9[dB]
X_Pulse        = 5.4[us]
Irr_Mode       = Off
Tri_Mode       = Off
Dante_Presat   = FALSE
Initial_Wait   = 1[s]
Repetition_Time = 7.228224[s]

```

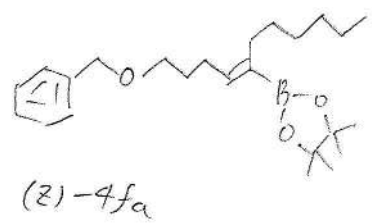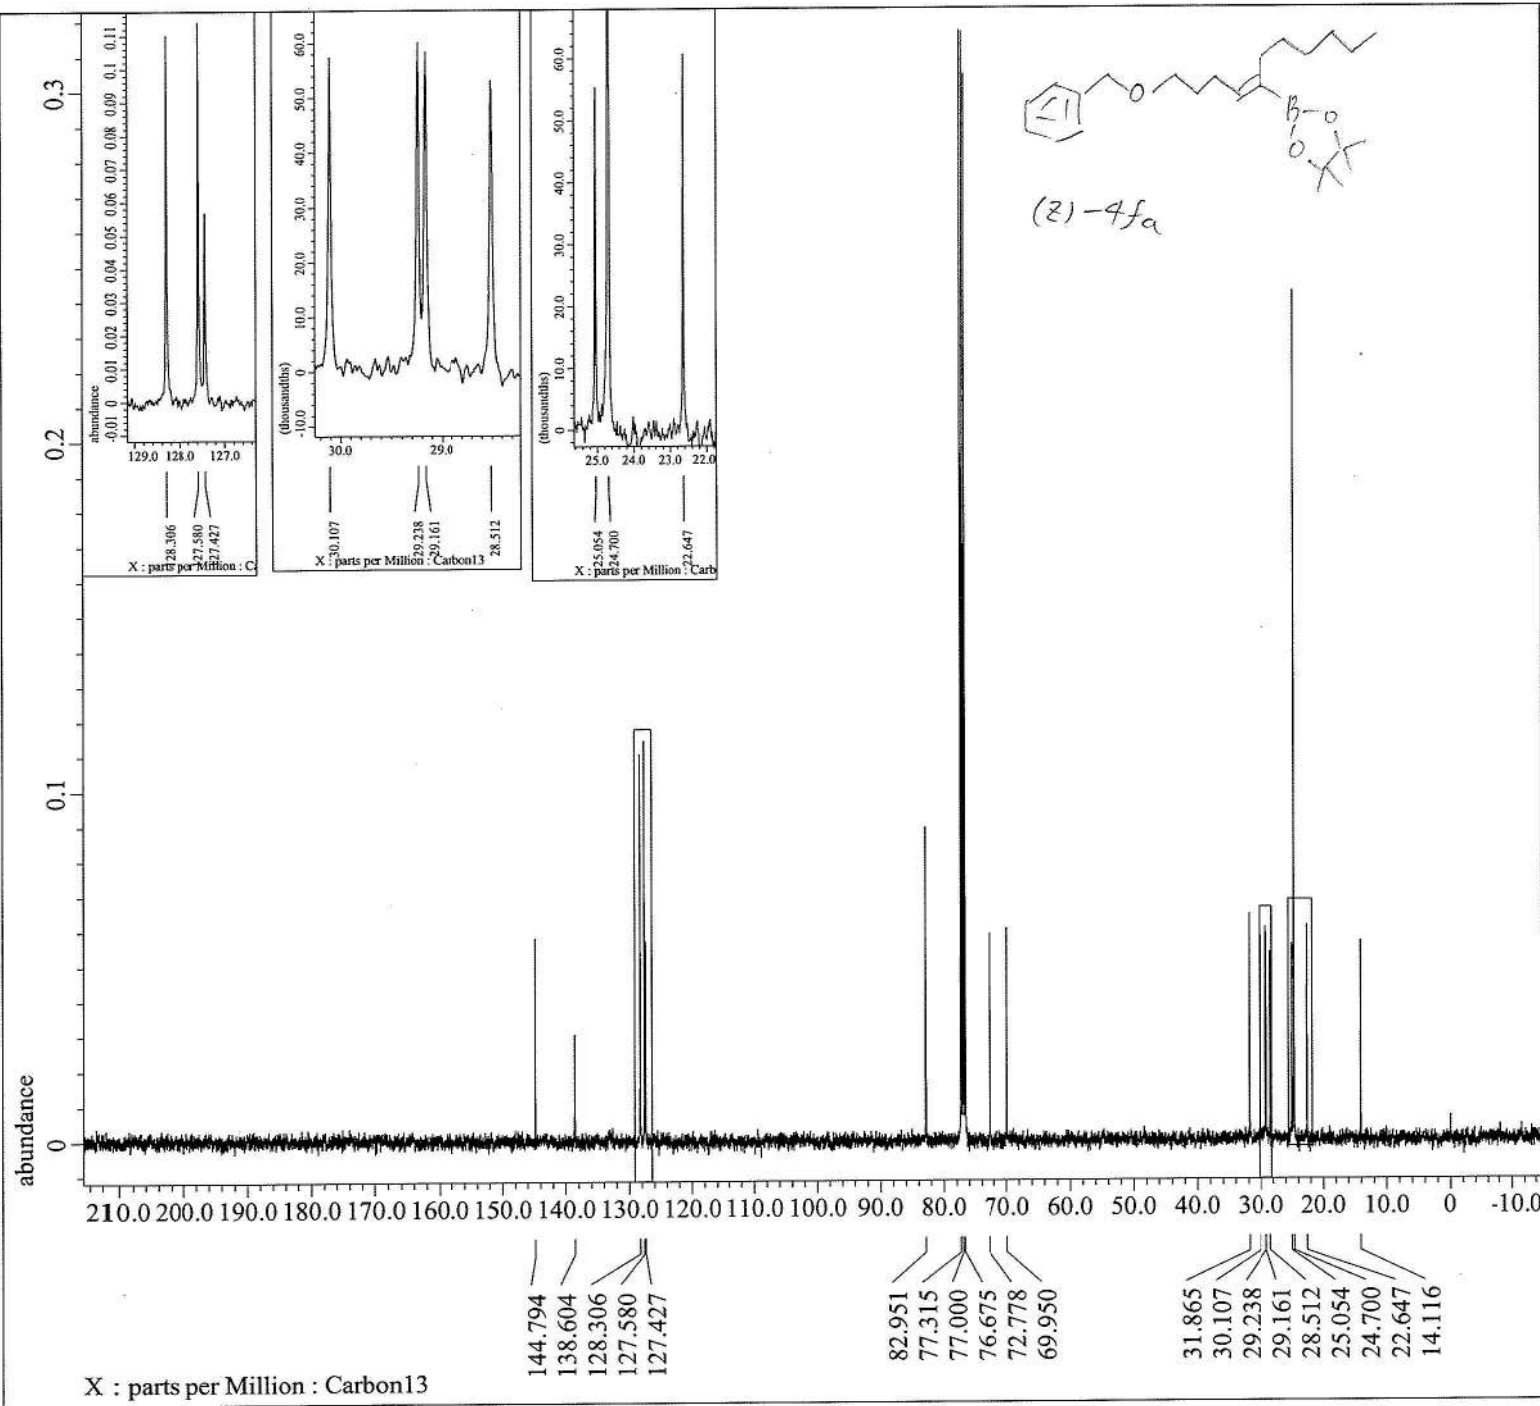

---- PROCESSING PARAMETERS ----  
 dc balance( 0, FALSE )  
 sexp( 2.0[Hz], 0.0[s] )  
 trapezoid( 0[%], 0[%], 80[%], 100[%] )  
 zerofill( 1 )  
 fft( 1, TRUE, TRUE )  
 machinephase  
 ppm  
 以下に由来: OBn C-B 13C\_Carbon-1-1.jdf

Filename = OBn C-B 13C\_Carbon-1-3.jd  
 Author = element  
 Experiment = carbon.jxp  
 Sample\_Id = OBn C-B 13C  
 Solvent = CHLOROFORM-D  
 Actual\_Start\_Time = 2-JUL-2021 16:35:17  
 Revision\_Time = 2-JUL-2021 21:05:24

Comment = single pulse decoupled ga  
 Data\_Format = 1D COMPLEX  
 Dim\_Size = 26214  
 Dim\_Title = Carbon13  
 Dim\_Units = [ppm]  
 Dimensions = X  
 Site = JNM-ECS400  
 Spectrometer = DELTA2\_NMR

Field\_Strength = 9.37221[T] (400[MHz])  
 X\_Acq\_Duration = 1.04333312[s]  
 X\_Domain = 13C  
 X\_Freq = 100.33735165[MHz]  
 X\_Offset = 100.0[ppm]  
 X\_Points = 32768  
 X\_Prescans = 4  
 X\_Resolution = 0.95846665[Hz]  
 X\_Sweep = 31.40703518[kHz]  
 X\_Sweep\_Clippped = 25.12562814[kHz]  
 Irr\_Domain = Proton  
 Irr\_Freq = 399.03472754[MHz]  
 Irr\_Offset = 5.0[ppm]  
 Clipped = FALSE  
 Scans = 388  
 Total\_Scans = 388

Relaxation\_Delay = 2[s]  
 Recvr\_Gain = 50  
 Temp\_Get = 19.3[dC]  
 X\_90\_Width = 10.9[us]  
 X\_Acq\_Time = 1.04333312[s]  
 X\_Angle = 30[deg]  
 X\_Atn = 5.4[dB]  
 X\_Pulse = 3.63333333[us]  
 Irr\_Atn\_Dec = 25.823[dB]  
 Irr\_Atn\_No = 25.823[dB]  
 Irr\_Noise = WALTZ  
 Irr\_Pwidth = 0.115[ms]  
 Decoupling = TRUE  
 Initial\_Wait = 1[s]  
 Noe = TRUE  
 Noe\_Time = 2[s]  
 Repetition\_Time = 3.04333312[s]



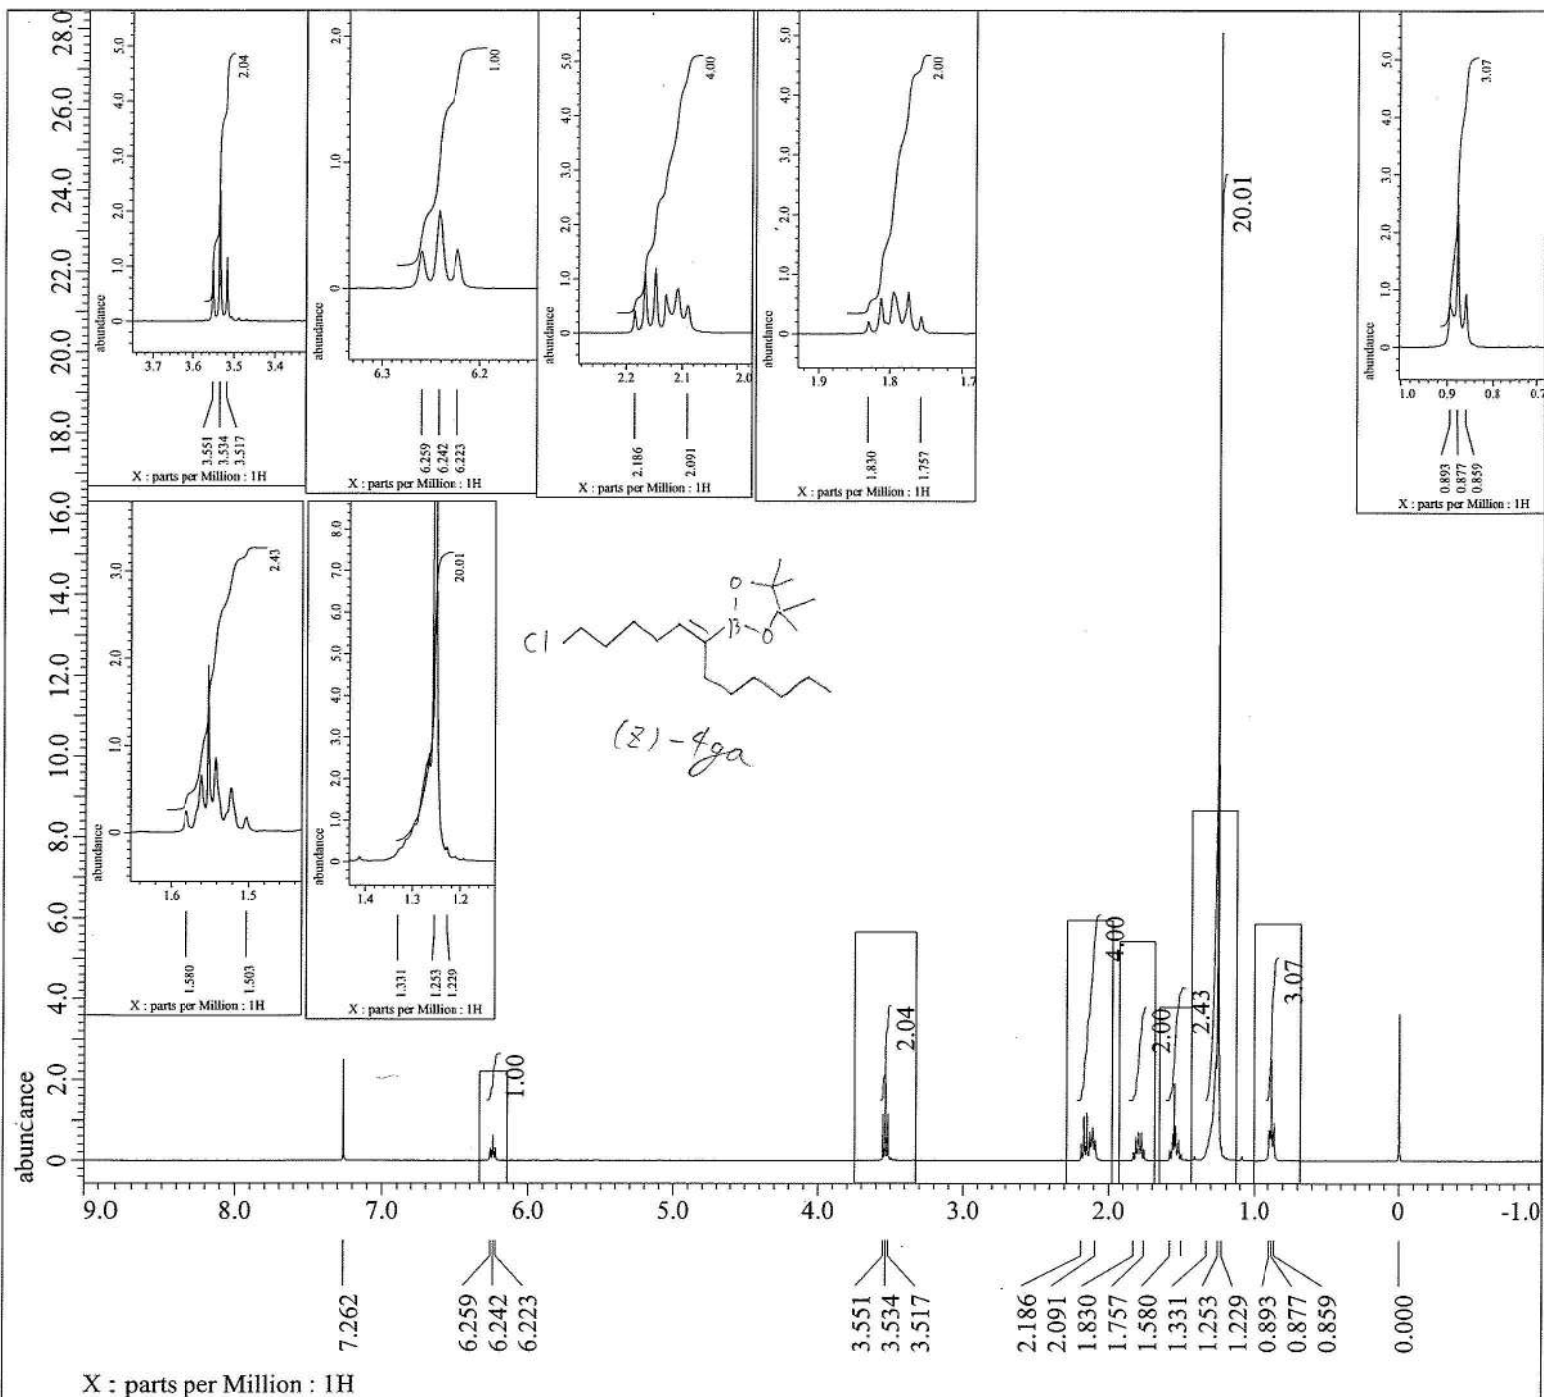

---- PROCESSING PARAMETERS ----  
 dc\_balance( 0, FALSE )  
 sexp( 0.2[Hz], 0.0[s] )  
 trapezoid3( 0[%], 80[%], 100[%] )  
 zerofill( 1 )  
 fft( 1, TRUE, TRUE )  
 machinephase  
 ppm  
 以下に由来: SRT 073 C4Cl C-B-2.jdf

Filename = SRT 073 C4Cl C-B-4.jdf  
 Author = element  
 Experiment = single\_pulse.ex2  
 Sample\_Id = S#782704  
 Solvent = CHLOROFORM-D  
 Actual\_Start\_Time = 28-MAY-2021 04:27:24  
 Revision\_Time = 8-SEP-2021 12:30:20

Comment = single\_pulse  
 Data\_Format = 1D\_COMPLEX  
 Dim\_Size = 13107  
 Dim\_Title = 1H  
 Dim\_Units = [ppm]  
 Dimensions = X  
 Site = ECS 400  
 Spectrometer = JNM-ECS400

Field\_Strength = 9.20197068[T] (390[MHz])  
 X\_Acq\_Duration = 2.228224[s]  
 X\_Domain = 1H  
 X\_Freq = 391.78655441[MHz]  
 X\_Offset = 5[ppm]  
 X Points = 16384  
 X\_Prescans = 1  
 X\_Resolution = 0.44878791[Hz]  
 X\_Sweep = 7.35294118[kHz]  
 Irr\_Domain = 1H  
 Irr\_Freq = 391.78655441[MHz]  
 Irr\_Offset = 5[ppm]  
 Tri\_Domain = 1H  
 Tri\_Freq = 391.78655441[MHz]  
 Tri\_Offset = 5[ppm]  
 Clipped = FALSE  
 Scans = 8  
 Total\_Scans = 8

Relaxation\_Delay = 5[s]  
 Recvr\_Gain = 48  
 Temp\_Get = 20.3[dC]  
 X\_90\_Width = 10.8[us]  
 X\_Acq\_Time = 2.228224[s]  
 X\_Angle = 45[deg]  
 X\_Atn = 1.9[dB]  
 X\_Pulse = 5.4[us]  
 Irr\_Mode = Off  
 Tri\_Mode = Off  
 Dante\_Presat = FALSE  
 Initial\_Wait = 1[s]  
 Repetition\_Time = 7.228224[s]



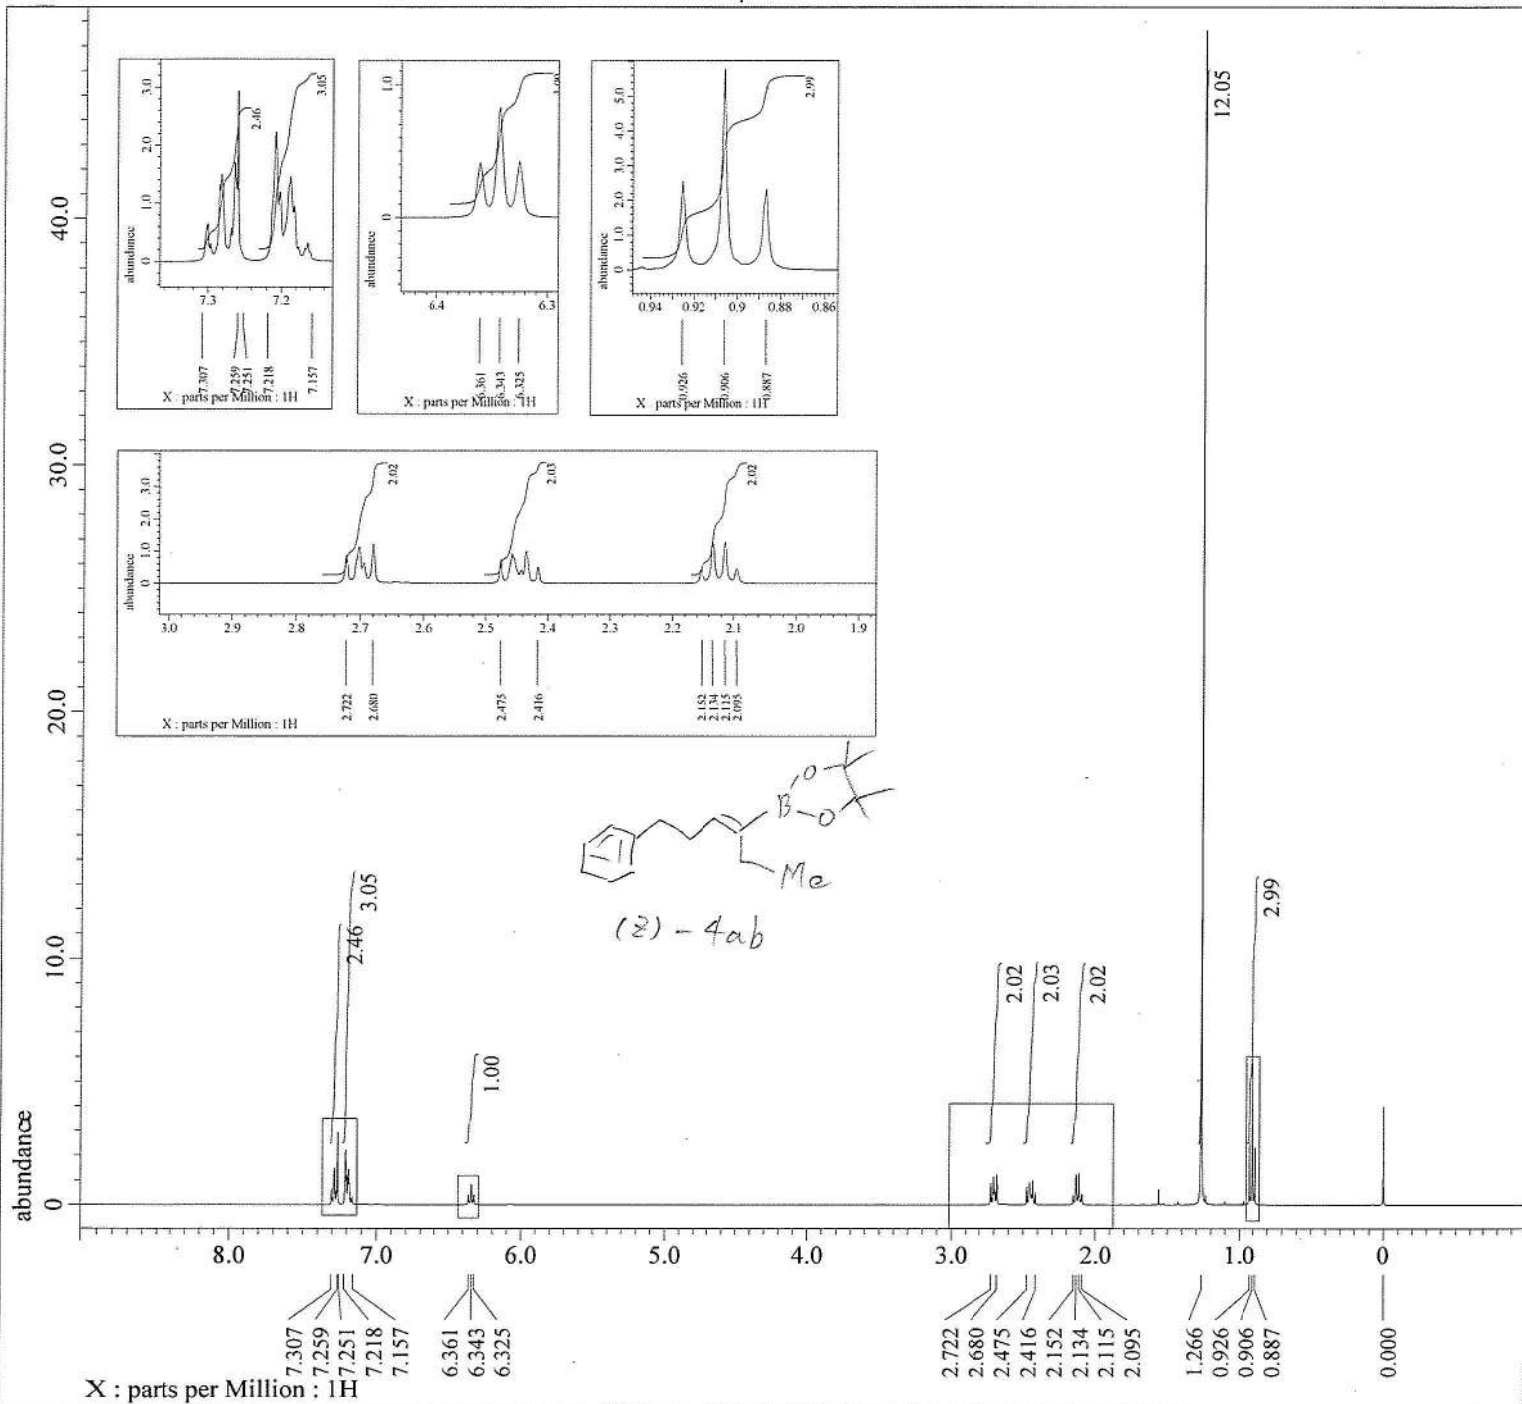

----- PROCESSING PARAMETERS -----  
 dc\_balance( 0, FALSE )  
 sexp( 0.2[Hz], 0.0[s] )  
 trapezoid3( 0[%], 80[%], 100[%] )  
 zerofill( 1 )  
 fft( 1, TRUE, TRUE )  
 machinephase  
 ppm  
 Derived from: SRT 016 C-B MeI column-1.jdf

Filename = SRT 016 C-B MeI column-6.  
 Author = element  
 Experiment = single\_pulse.ex2  
 Sample Id = S#512431  
 Solvent = CHLOROFORM-D  
 Actual\_Start Time = 26-APR-2021 21:01:12  
 Revision\_Time = 14-JUN-2021 10:33:35

Comment = single\_pulse  
 Data\_Format = 1D\_COMPLEX  
 Dim\_Size = 13107  
 X\_Domain = 1H  
 Dim\_Title = 1H  
 Dim\_Units = [ppm]  
 Dimensions = X  
 Site = ECS 400  
 Spectrometer = JNM-ECS400

Field Strength = 9.20197068[T] (390[MHz])  
 X\_Acq\_Duration = 2.228224[s]  
 X\_Domain = 1H  
 X\_Freq = 391.78655441[MHz]  
 X\_Offset = 5[ppm]  
 X\_Points = 16384  
 X\_Prescans = 1  
 X\_Resolution = 0.44878791[Hz]  
 X\_Sweep = 7.35294118[kHz]  
 Irr\_Domain = 1H  
 Irr\_Freq = 391.78655441[MHz]  
 Irr\_Offset = 5[ppm]  
 Tri\_Domain = 1H  
 Tri\_Freq = 391.78655441[MHz]  
 Tri\_Offset = 5[ppm]  
 Clipped = FALSE  
 Scans = 8  
 Total\_Scans = 8

Relaxation\_Delay = 5[s]  
 Recvr Gain = 44  
 Temp\_Get = 19.1[dC]  
 X\_90\_Width = 10.8[us]  
 X\_Acq\_Time = 2.228224[s]  
 X\_Angle = 45[deg]  
 X\_Atn = 1.9[dB]  
 X\_Pulse = 5.4[us]  
 Irr\_Mode = Off  
 Tri\_Mode = Off  
 Dante\_Presat = FALSE  
 Initial\_Wait = 1[s]  
 Repetition\_Time = 7.228224[s]

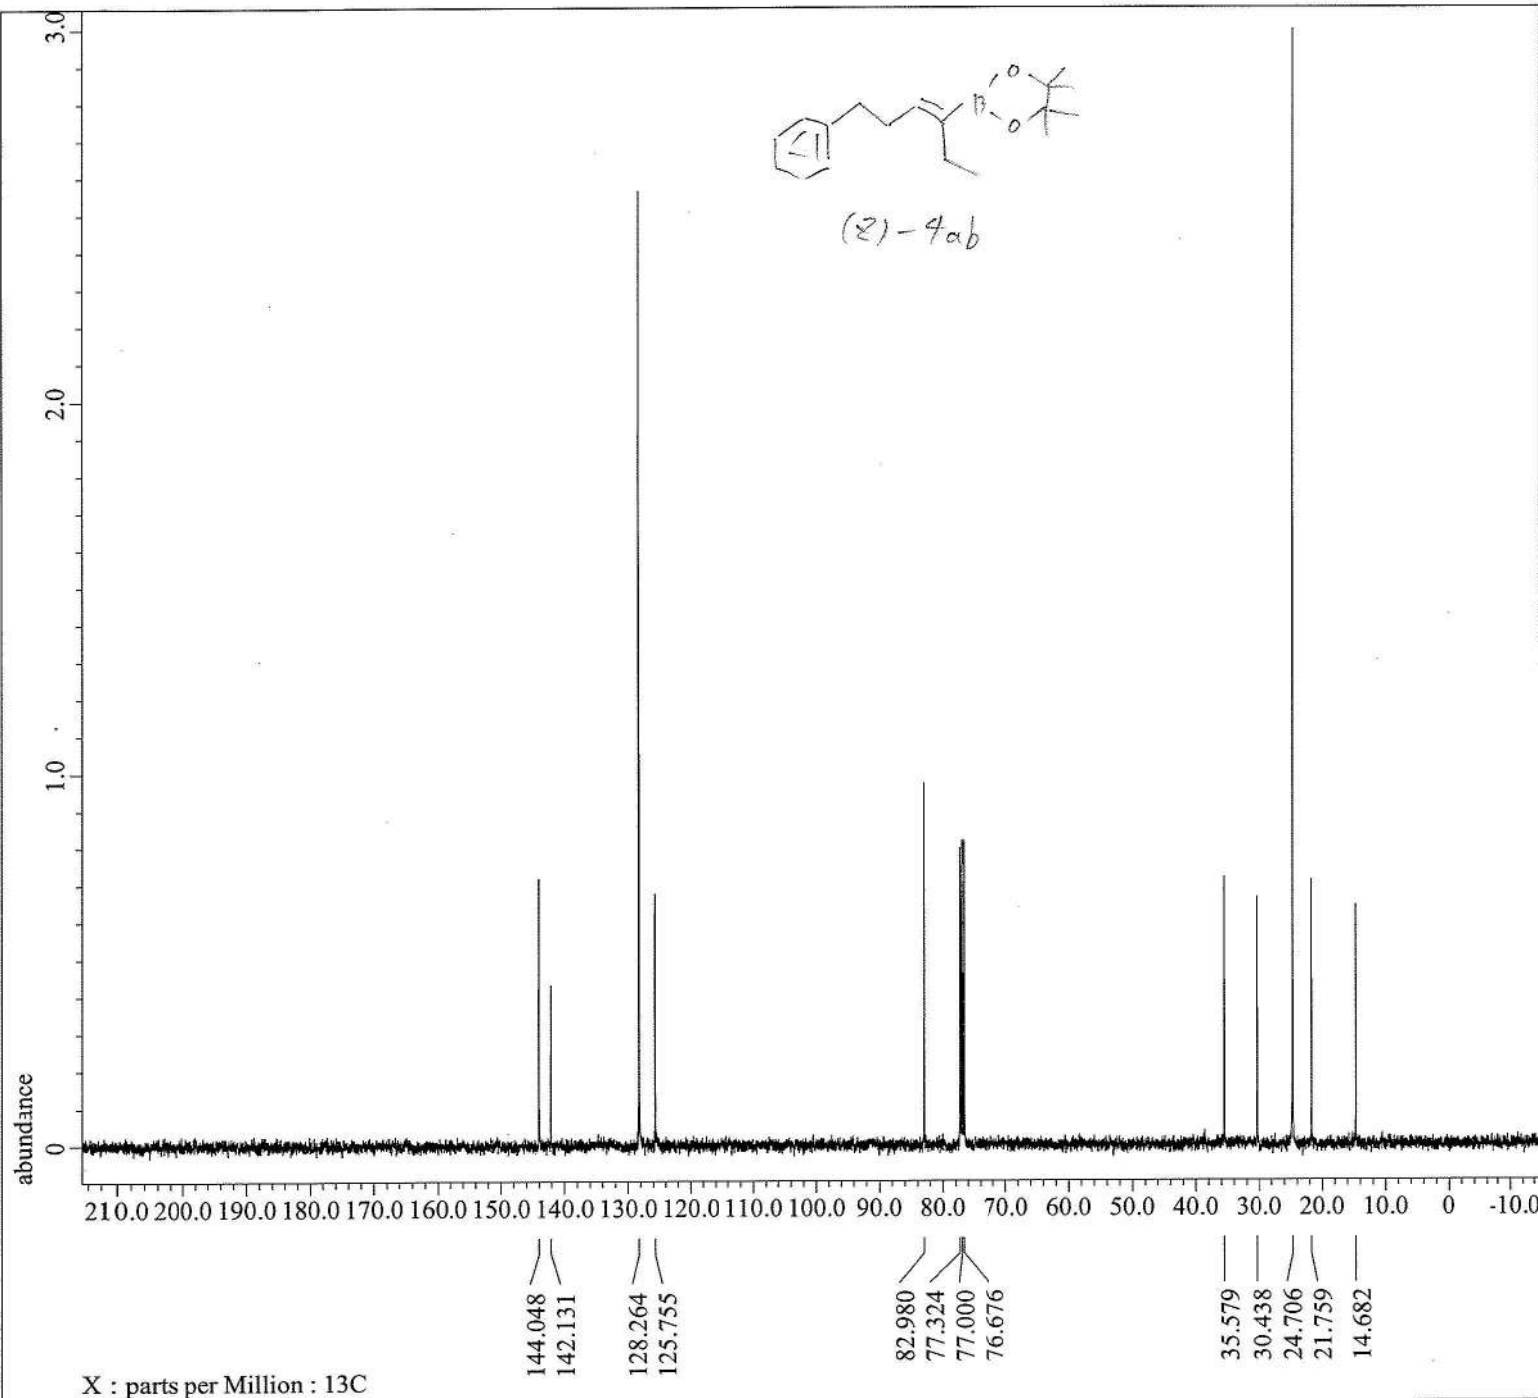

---- PROCESSING PARAMETERS ----  
 dc\_balance( 0, FALSE )  
 sexp( 2.0[Hz], 0.0[s] )  
 trapezoid3( 0[%], 80[%], 100[%] )  
 zerofill( 1 )  
 fft( 1, TRUE, TRUE )  
 machinephase  
 ppm  
 以下に由来: SRT 016 C-B MeI column 13C-2.jdf

|                   |                             |
|-------------------|-----------------------------|
| Filename          | = SRT 016 C-B MeI column 13 |
| Author            | = element                   |
| Experiment        | = single_pulse_dec          |
| Sample Id         | = 1                         |
| Solvent           | = CHLOROFORM-D              |
| Actual_Start_Time | = 26-APR-2021 22:42:14      |
| Revision_Time     | = 30-JUN-2021 21:36:18      |
| Comment           | = single pulse decoupled ga |
| Data_Format       | = 1D COMPLEX                |
| Dim_Size          | = 26214                     |
| Dim_Title         | = 13C                       |
| Dim_Units         | = [ppm]                     |
| Dimensions        | = X                         |
| Site              | = ECS 400                   |
| Spectrometer      | = JNM-ECS400                |
| Field_Strength    | = 9.20197068[T] (390[MHz])  |
| X_Acq_Duration    | = 1.06430464[s]             |
| X_Domain          | = 13C                       |
| X_Freq            | = 98.51479726[MHz]          |
| X_Offset          | = 100[ppm]                  |
| X_Points          | = 32768                     |
| X_Prescans        | = 4                         |
| X_Resolution      | = 0.93958061[Hz]            |
| X_Sweep           | = 30.78817734[kHz]          |
| Irr_Domain        | = 1H                        |
| Irr_Freq          | = 391.78655441[MHz]         |
| Irr_Offset        | = 5[ppm]                    |
| Clipped           | = FALSE                     |
| Scans             | = 55                        |
| Total_Scans       | = 55                        |
| Relaxation_Delay  | = 2[s]                      |
| Recvr_Gain        | = 60                        |
| Temp_Get          | = 18.3[dC]                  |
| X_90_Width        | = 8.7[us]                   |
| X_Acq_Time        | = 1.06430464[s]             |
| X_Angle           | = 30[deg]                   |
| X_Atn             | = 4.9[dB]                   |
| X_Pulse           | = 2.9[us]                   |
| Irr_Atn_Dec       | = 22.45[dB]                 |
| Irr_Atn_No        | = 22.45[dB]                 |
| Irr_Noise         | = WALTZ                     |
| Decoupling        | = TRUE                      |
| Initial_wait      | = 1[s]                      |
| Noe               | = TRUE                      |
| Noe_Time          | = 2[s]                      |
| Repetition_Time   | = 3.06430464[s]             |

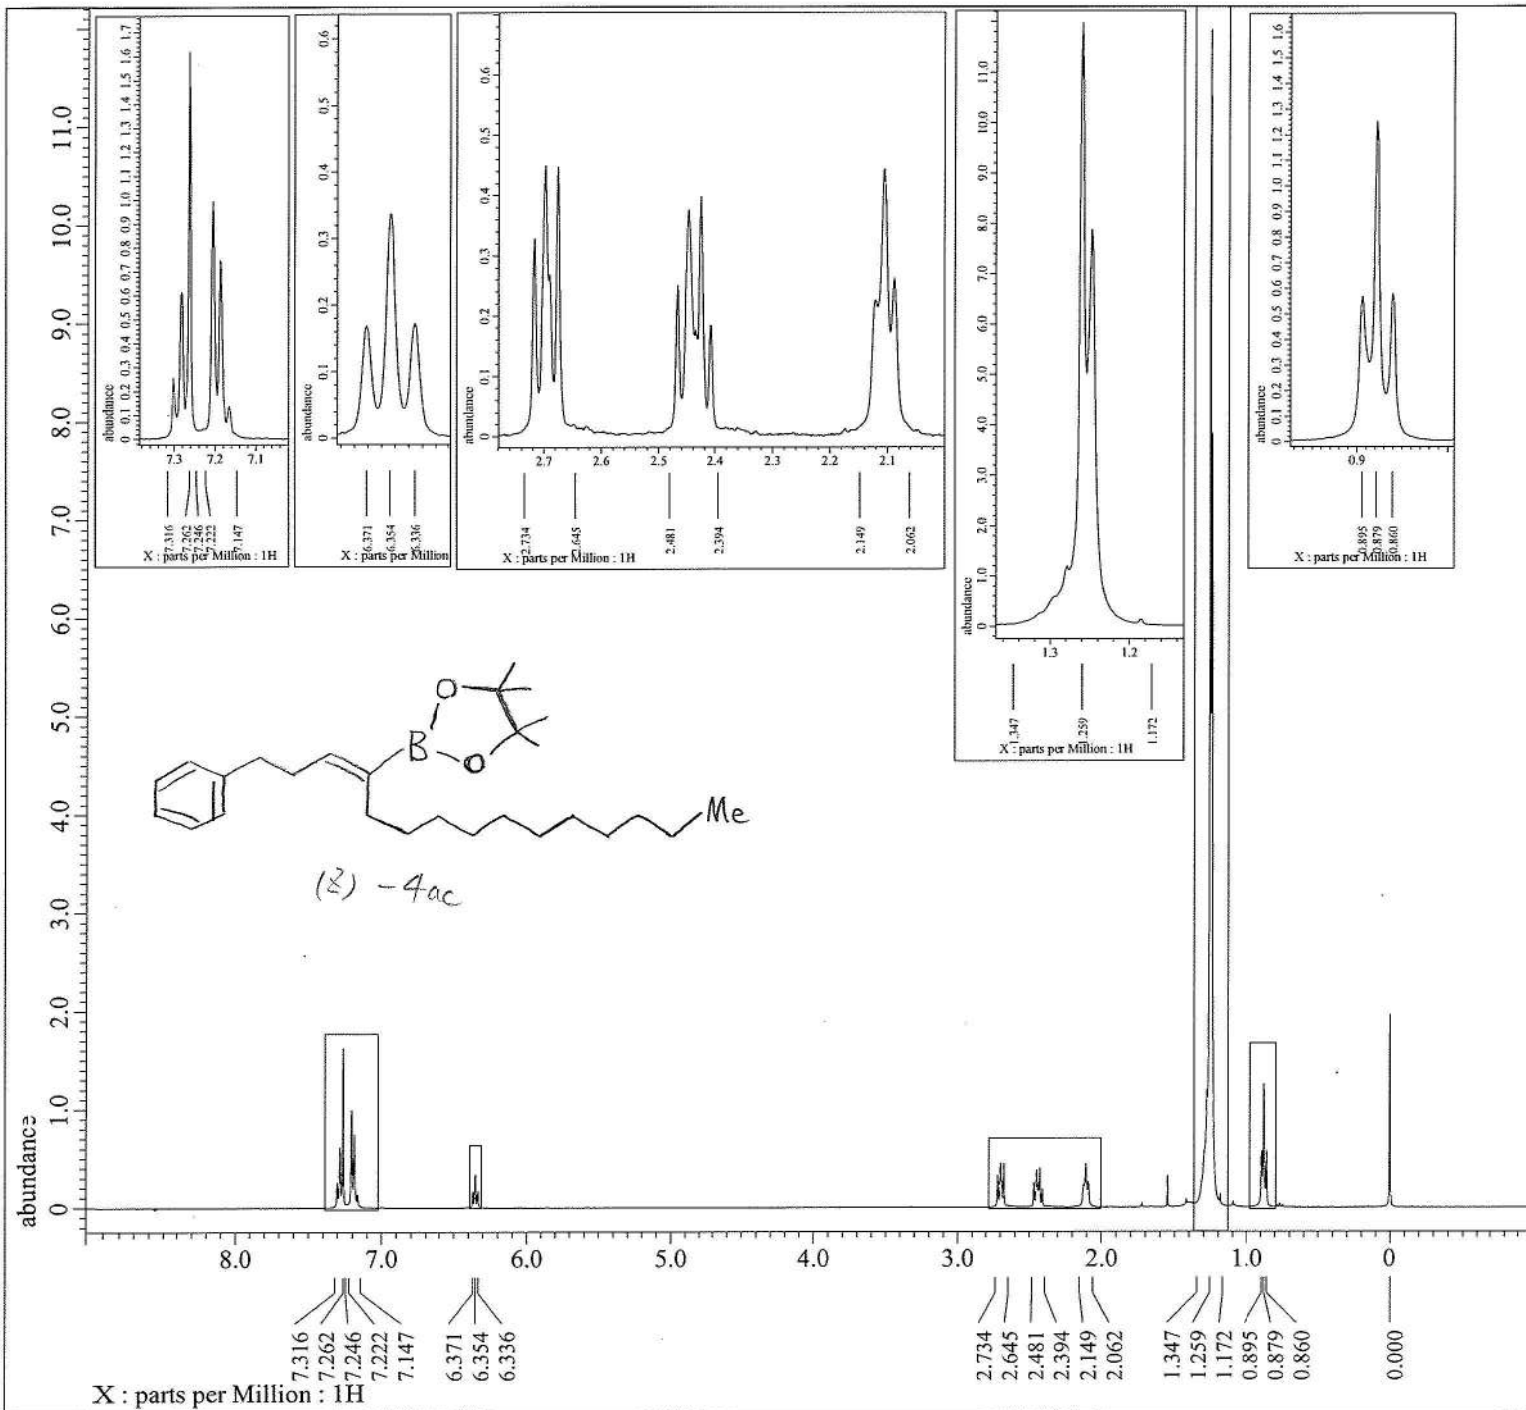

```

---- PROCESSING PARAMETERS ----
dc_balance( 0, FALSE )
sexp( 0.2[Hz], 0.0[s] )
trapezoid3( 0[%], 80[%], 100[%] )
zerofill( 1 )
fft( 1, TRUE, TRUE )
machinephase
ppm

以下に由来: EDK-423 pure 1H-1.jdf

Filename      = EDK-423 pure 1H-2.jdf
Author       = element
Experiment   = single_pulse.ex2
Sample_Id    = S#727225
Solvent      = CHLOROFORM-D
Actual_Start Time = 14-APR-2020 03:26:20
Revision_Time = 16-MAR-2021 11:58:35

Comment      = single_pulse
Data_Format   = 1D COMPLEX
Dim_Size     = 13107
X_Domain     = 1H
Dim_Title    = 1H
Dim_Units   = [ppm]
Dimensions   = X
Site        = ECS 400
Spectrometer = JNM-ECS400

Field_Strength = 9.20197068[T] (390 [MHz])
X_Acq_Duration = 2.228224[s]
X_Domain      = 1H
X_Freq       = 391.78655441 [MHz]
X_Offset     = 5 [ppm]
X_Points     = 16384
X_Prescans   = 1
X_Resolution = 0.44878791 [Hz]
X_Sweep      = 7.35294118 [kHz]
Irr_Domain   = 1H
Irr_Freq     = 391.78655441 [MHz]
Irr_Offset   = 5 [ppm]
Tri_Domain   = 1H
Tri_Freq     = 391.78655441 [MHz]
Tri_Offset   = 5 [ppm]
Clipped     = FALSE
Scans       = 8
Total_Scans = 8

Relaxation_Delay = 5 [s]
Recvr_Gain       = 44
Temp_Get        = 20.9 [dC]
X_90_Width     = 11.04 [us]
X_ACQ_Time     = 2.228224 [s]
X_Angle       = 45 [deg]
X_Atn         = 1.9 [dB]
X_Pulse       = 5.52 [us]
Irr_Mode      = Off
Tri_Mode      = Off
Dante_Presat  = FALSE
Initial_Wait  = 1 [s]
Repetition_Time = 7.228224 [s]

```

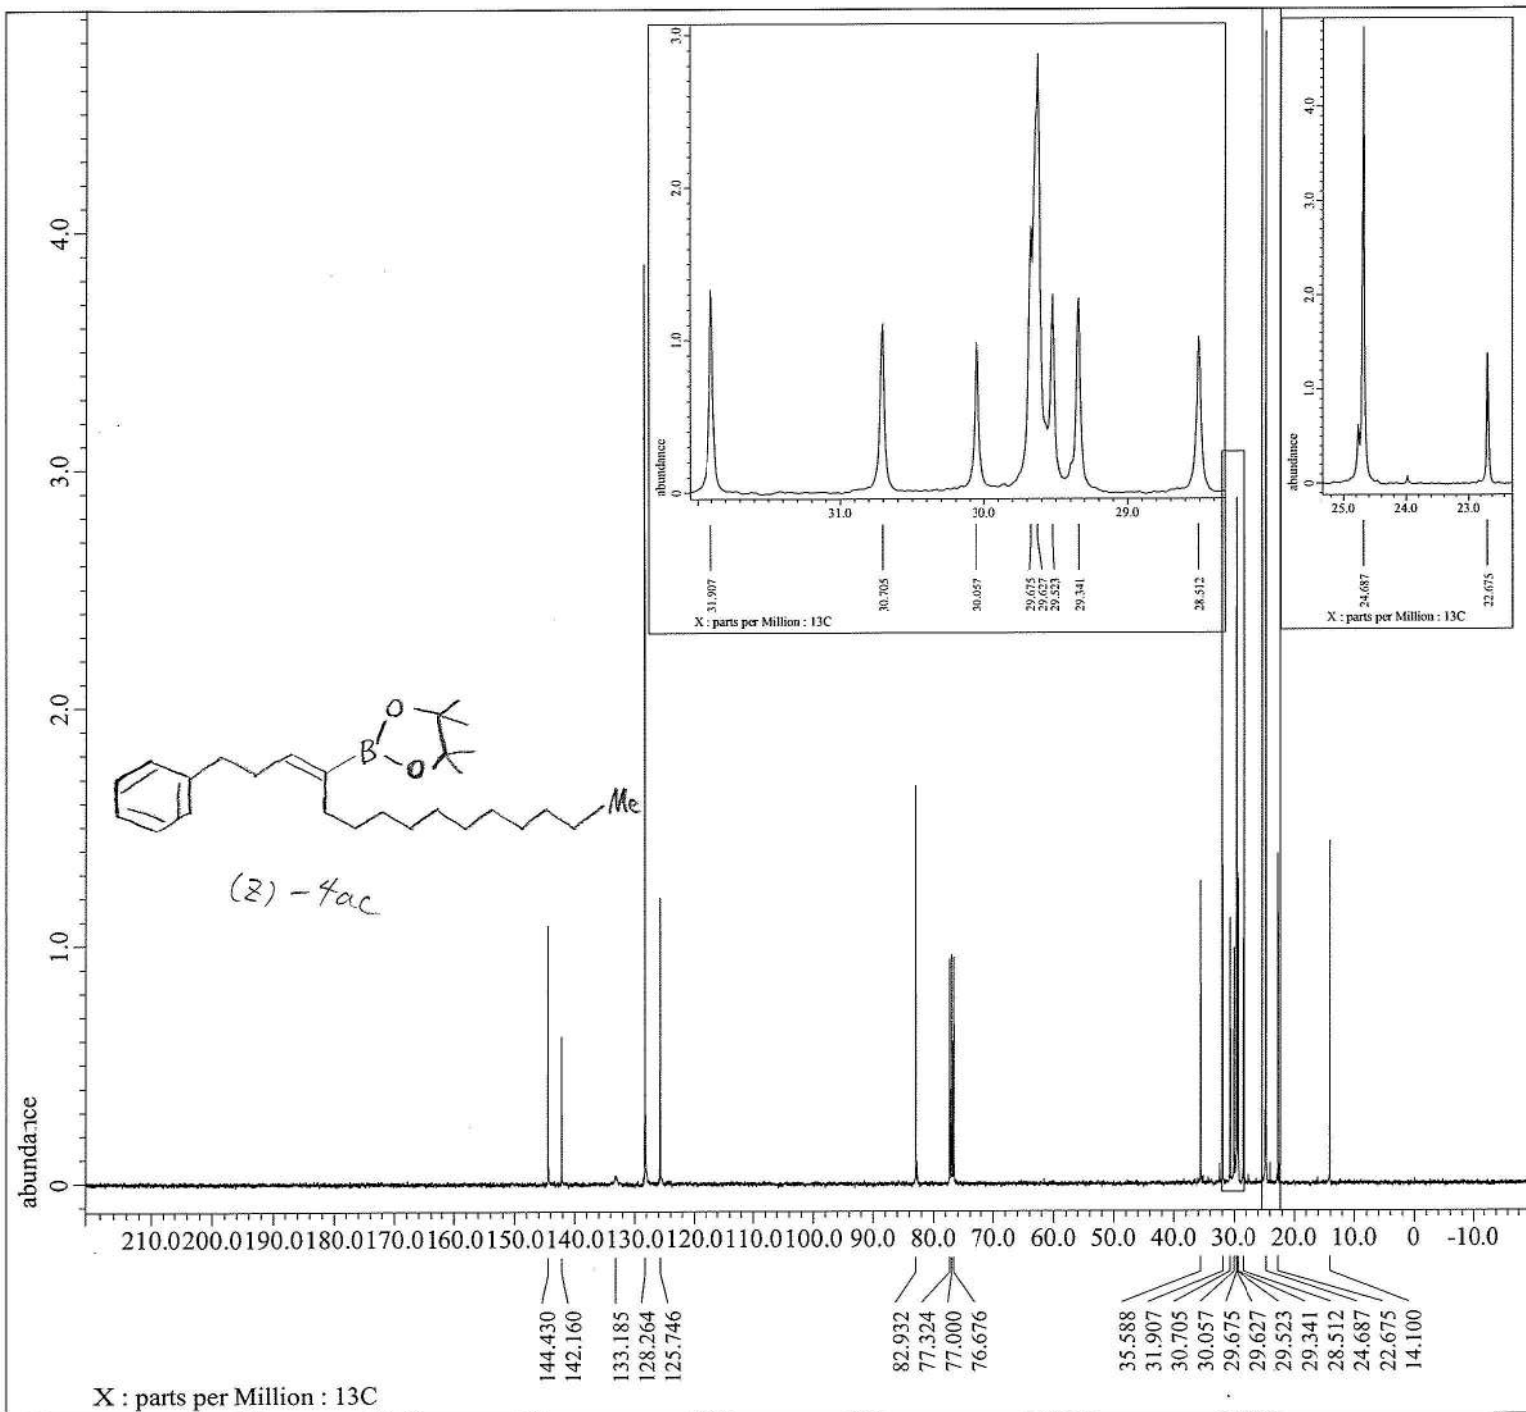

```

---- PROCESSING PARAMETERS ----
dc_balance( 0, FALSE )
sexp( 2.0[Hz], 0.0[s] )
trapezoid3( 0[%], 80[%], 100[%] )
zerofill( 1 )
fft( 1, TRUE, TRUE )
machinephase
ppm

以下に由来: EDK-423 pure 13C-1.jdf

```

```

Filename      = EDK-423 pure 13C-2.jdf
Author       = element
Experiment   = single_pulse_dec
Sample_Id    = S#712398
Solvent      = CHLOROFORM-D
Actual_Start Time = 14-APR-2020 03:00:02
Revision_Time = 16-MAR-2021 12:44:17

```

```

Comment      = single pulse decoupled ga
Data Format   = 1D COMPLEX
Dim_Size     = 26214
X_Domain     = 13C
Dim_Title    = 13C
Dim_Units    = [ppm]
Dimensions   = X
Site         = ECS 400
Spectrometer = JNM-ECS400

```

```

Field_Strength = 9.20197068[T] (390[MHz])
X_Acq_Duration = 1.06430464[s]
X_Domain       = 13C
X_Freq         = 98.51479726[MHz]
X_Offset       = 100[ppm]
X_Points       = 32768
X_Prescans     = 4
X_Resolution   = 0.93958061[Hz]
X_Sweep        = 30.78817734[kHz]
Irr_Domain     = 1H
Irr_Freq       = 391.78655441[MHz]
Irr_Offset     = 5[ppm]
Clipped        = FALSE
Scans          = 200
Total_Scans    = 200

```

```

Relaxation_Delay = 2[s]
Recvr_Gain       = 60
Temp_Get         = 21.2[dC]
X_90_Width       = 9.11[us]
X_Acq_Time       = 1.06430464[s]
X_Angle          = 30[deg]
X_Atn            = 4.9[dB]
H_Pulsec         = 3.03666667[us]
Irr_Atn_Dec      = 22.255[dB]
Irr_Atn_Noise   = 22.255[dB]
Irr_Noise        = WALTZ
Decoupling       = TRUE
Initial_Wait     = 1[s]
Noe              = TRUE
Noe_Time         = 2[s]
Repetition_Time  = 3.06430464[s]

```

X : parts per Million : 13C

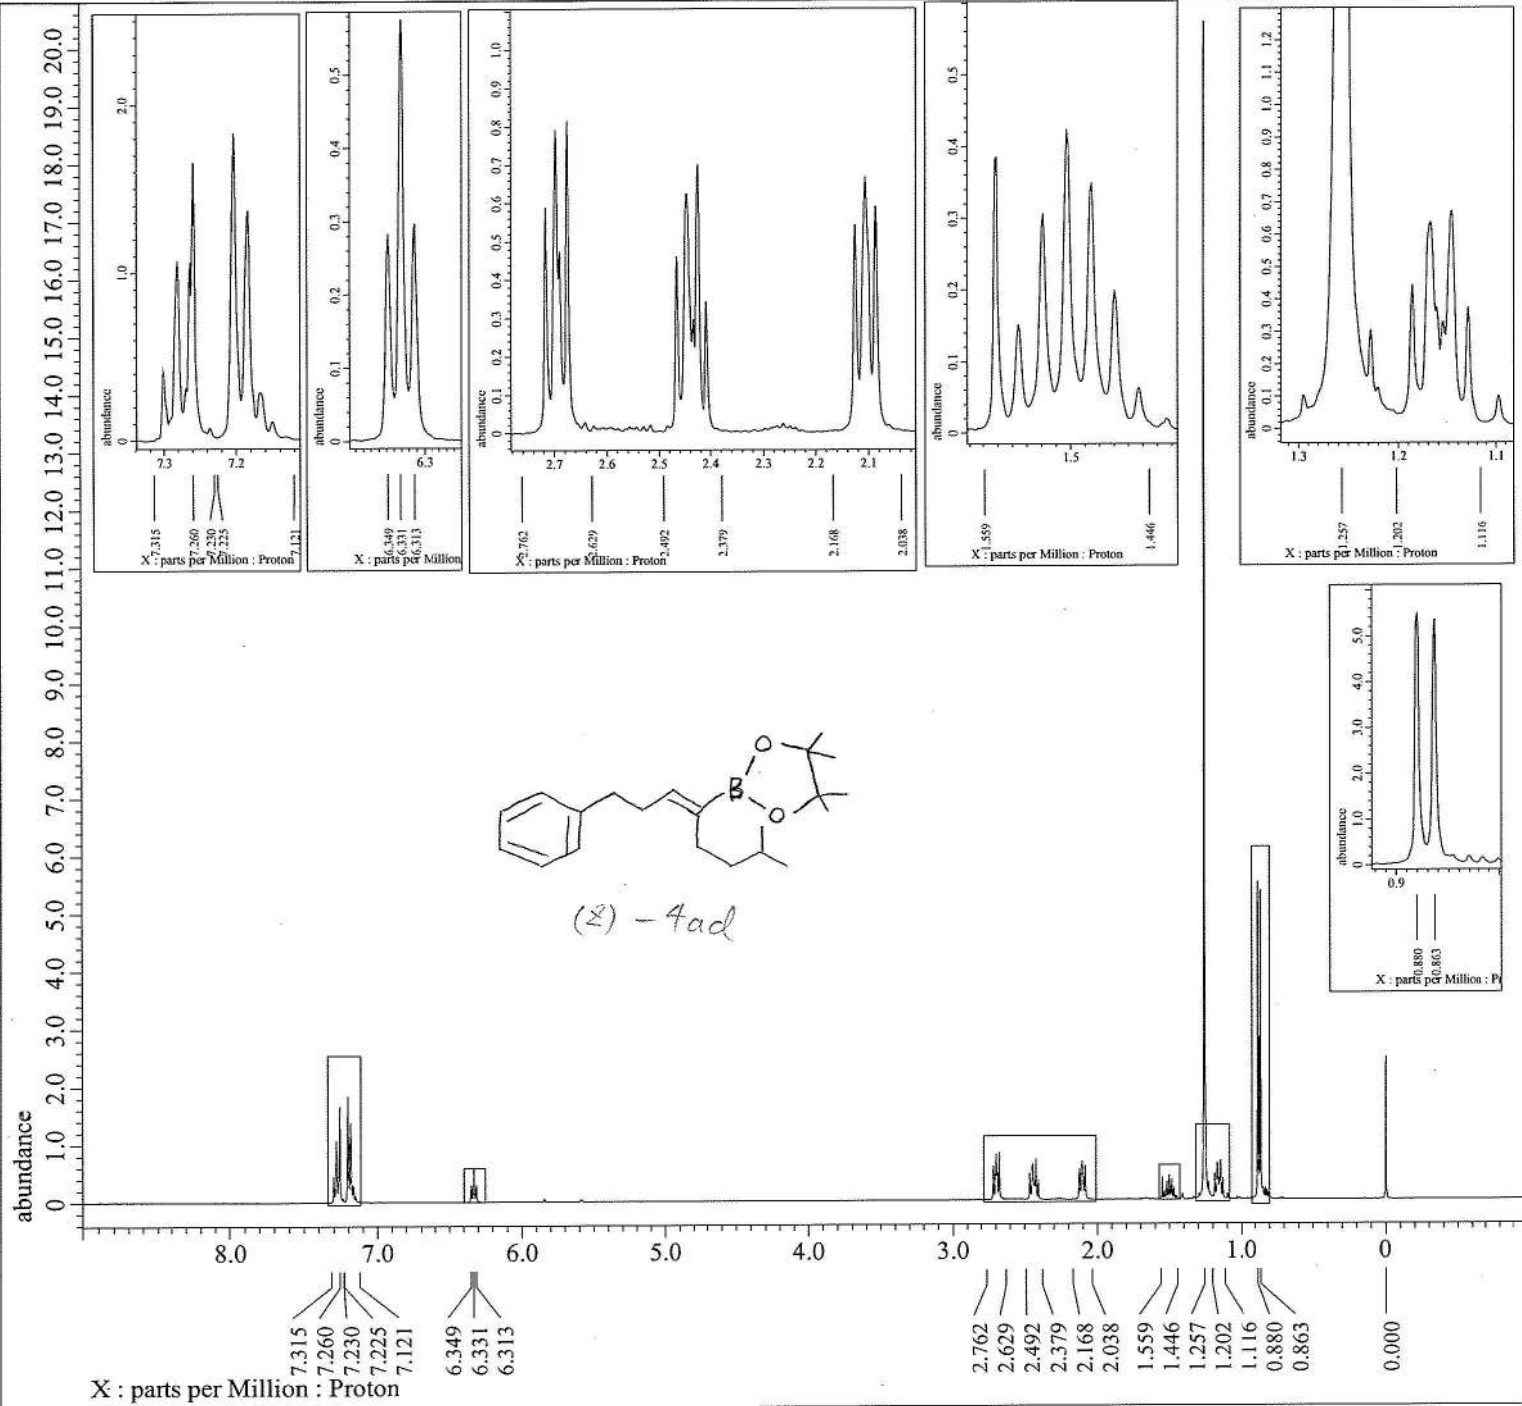

```

---- PROCESSING PARAMETERS ----
dc_balance( 0, FALSE )
sexp( 0.2[Hz], 0.0[s] )
trapezoid( 0[%], 0[%], 80[%], 100[%] )
zerofill( 1 )
fft( 1, TRUE, TRUE )
machinephase
ppm

以下由来:: EDK-424 pure 1H_Proton-1-1.jdf
  
```

```

Filename      = EDK-424 pure 1H_Proton-1-
Author        = element
Experiment    = proton.jxp
Sample Id     = EDK-424 pure 1H
Solvent       = CHLOROFORM-D
Revised_Start_Time = 13-APR-2020 16:27:55
Revision_Time  = 17-MAR-2021 16:46:35
  
```

```

Comment       = single_pulse
Data_Format   = 1D_COMPLEX
Dim_Size      = 13107
X_Domain      = Proton
Dim_Title     = Proton
Dim_Units     = [ppm]
Dimensions    = X
Spectrometer  = DELTA2_NMR
  
```

```

Field_Strength = 9.4073814[T] (400[MHz])
X_Acq_Duration = 2.18103808[s]
X_Domain       = 1H
X_Freq         = 400.53219825[MHz]
X_Offset       = 5[ppm]
X_Points       = 16384
X_Prescans     = 1
X_Resolution   = 0.45849727[Hz]
X_Sweep        = 7.51201923[kHz]
X_Sweep_Clipped = 6.00961538[kHz]
Irr_Domain     = Proton
Irr_Freq       = 400.53219825[MHz]
Irr_Offset     = 5[ppm]
Tri_Domain     = Proton
Tri_Freq       = 400.53219825[MHz]
Tri_Offset     = 5[ppm]
Clipped        = FALSE
Scans          = 8
Total_Scans    = 8
  
```

```

Relaxation_Delay = 5[s]
Recvr_Gain       = 40
Temp_Get         = 20[dC]
X_90_Width       = 6[us]
X_acq_time       = 2.18103808[s]
X_Angle          = 45[deg]
X_Atn            = 0.8[dB]
X_Pulse          = 3[us]
Irr_Mode         = OFF
Tri_Mode         = Off
Dante_Preset     = FALSE
Initial_Wait     = 1[s]
Repetition_Time  = 7.18103808[s]
  
```

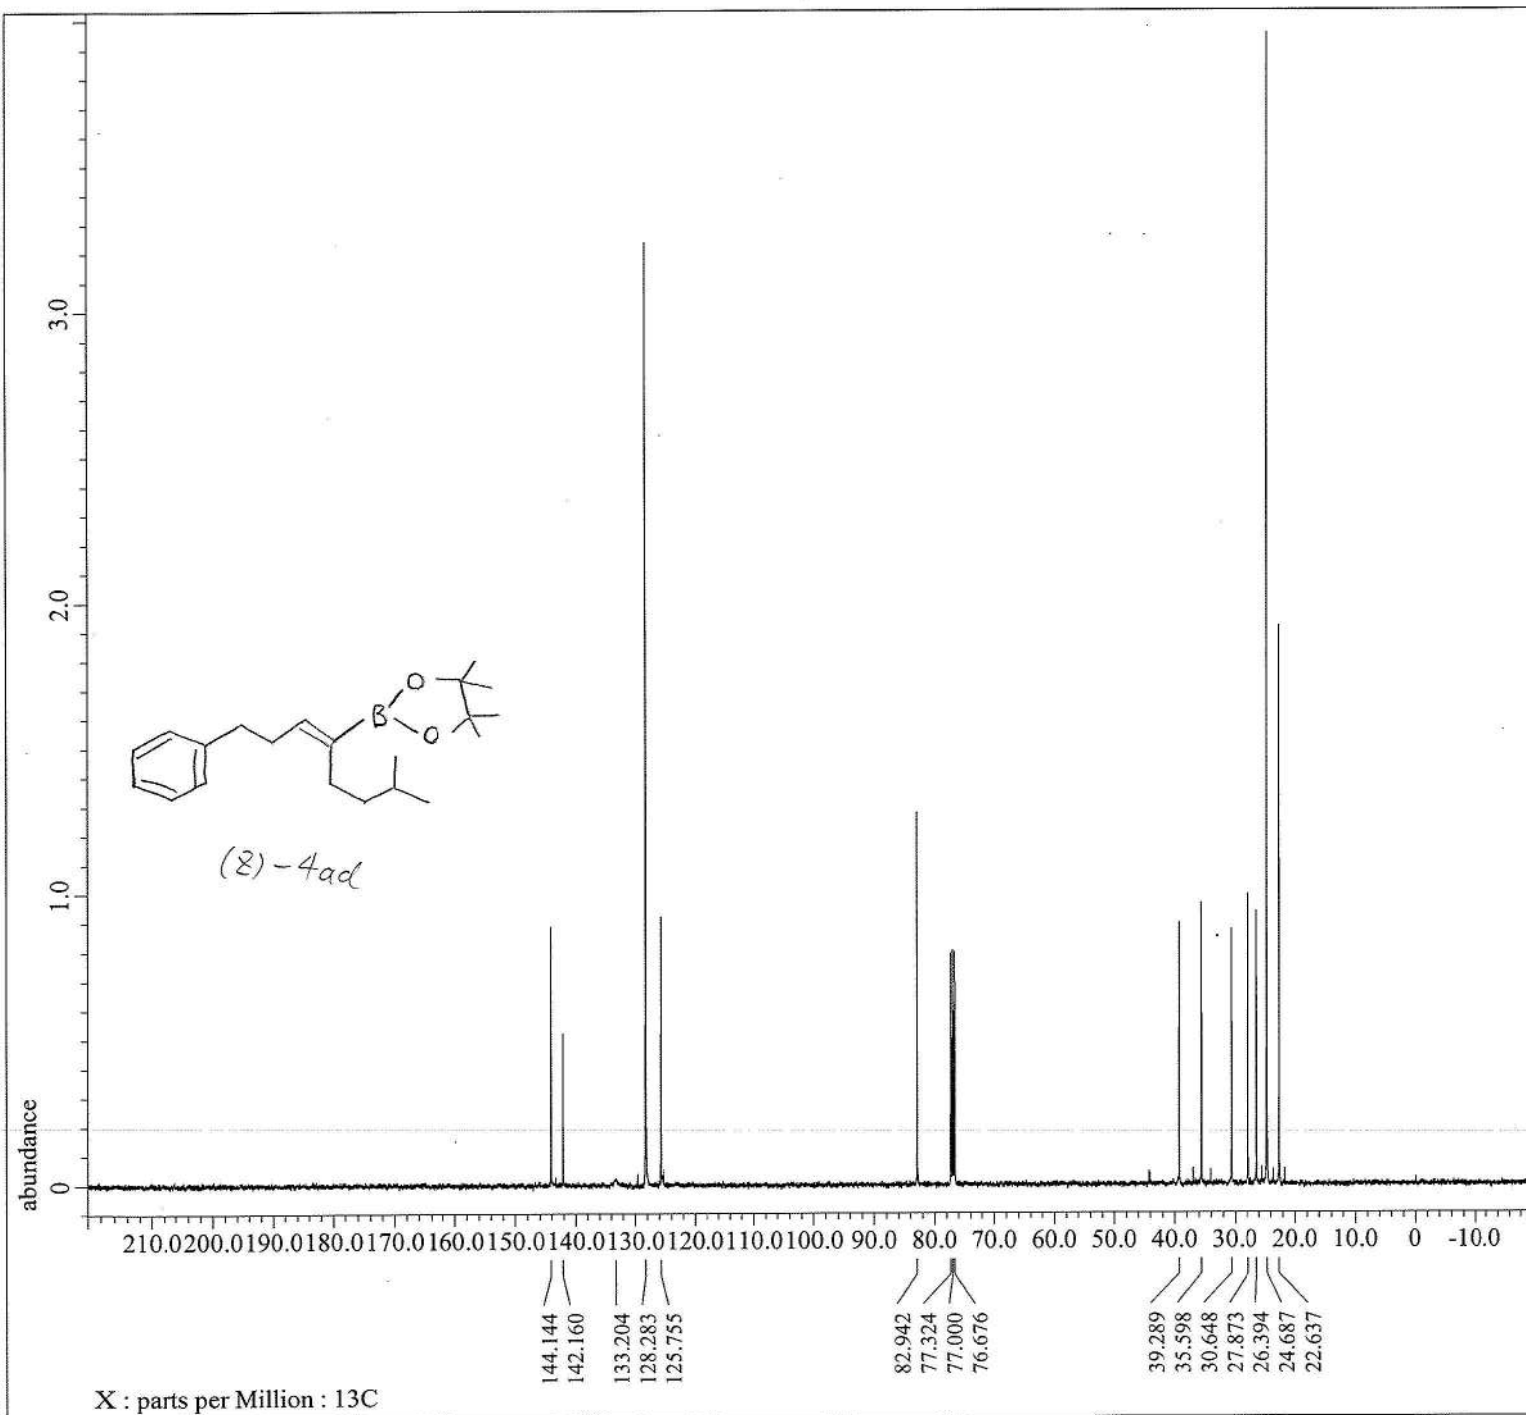

```

---- PROCESSING PARAMETERS ----
dc_balance( 0, FALSE )
sexp( 2.0[Hz], 0.0[s] )
trapezoid3( 0[%], 80[%], 100[%] )
zerofill( 1 )
fft( 1, TRUE, TRUE )
machinephase
ppm

```

以下に由来: EDK-424 pure 13C-1.jdf

```

Filename      = EDK-424 pure 13C-2.jdf
Author        = element
Experiment    = single_pulse_dec
Sample_Id     = S#738623
Solvent       = CHLOROFORM-D
Actual_Start_Time = 14-APR-2020 03:43:44
Revision_Time = 17-MAR-2021 16:47:42

```

```

Comment       = single pulse decoupled ga
Data_Format   = 1D COMPLEX
Dim_Size      = 26214
X_Domain      = 13C
Dim_Title     = 13C
Dim_Units     = [ppm]
Dimensions    = X
Site          = ECS 400
Spectrometer  = JNM-ECS400

```

```

Field_Strength = 9.20197068[T] (390[MHz])
X_Acq_Duration = 1.06430464[s]
X_Domain       = 13C
X_Freq         = 98.51479726 [MHz]
X_Offset       = 100[ppm]
X_Points       = 32768
X_Prescans     = 4
X_Resolution   = 0.93958061[Hz]
X_Sweep        = 30.78817734 [kHz]
Irr_Domain     = 1H
Irr_Freq       = 391.78655441 [MHz]
Irr_Offset     = 5[ppm]
Clipped        = FALSE
Scans          = 200
Total_Scans    = 200

```

```

Relaxation_Delay = 2[s]
Recvr_Gain       = 60
Temp_Get         = 21.2[dC]
X_90_Width       = 9.11[us]
X_Acq_Time       = 1.06430464[s]
X_Angle          = 30[deg]
X_Atn            = 4.9[dB]
X_Pulse         = 3.03666667[us]
Irr_Atn_Dec      = 22.255[dB]
Irr_Atn_Noise   = 22.255[dB]
Irr_Noise        = WALTZ
Decoupling       = TRUE
Initial_Wait     = 1[s]
Noe              = TRUE
Noe_Time         = 2[s]
Repetition_Time  = 3.06430464[s]

```

X : parts per Million : 13C



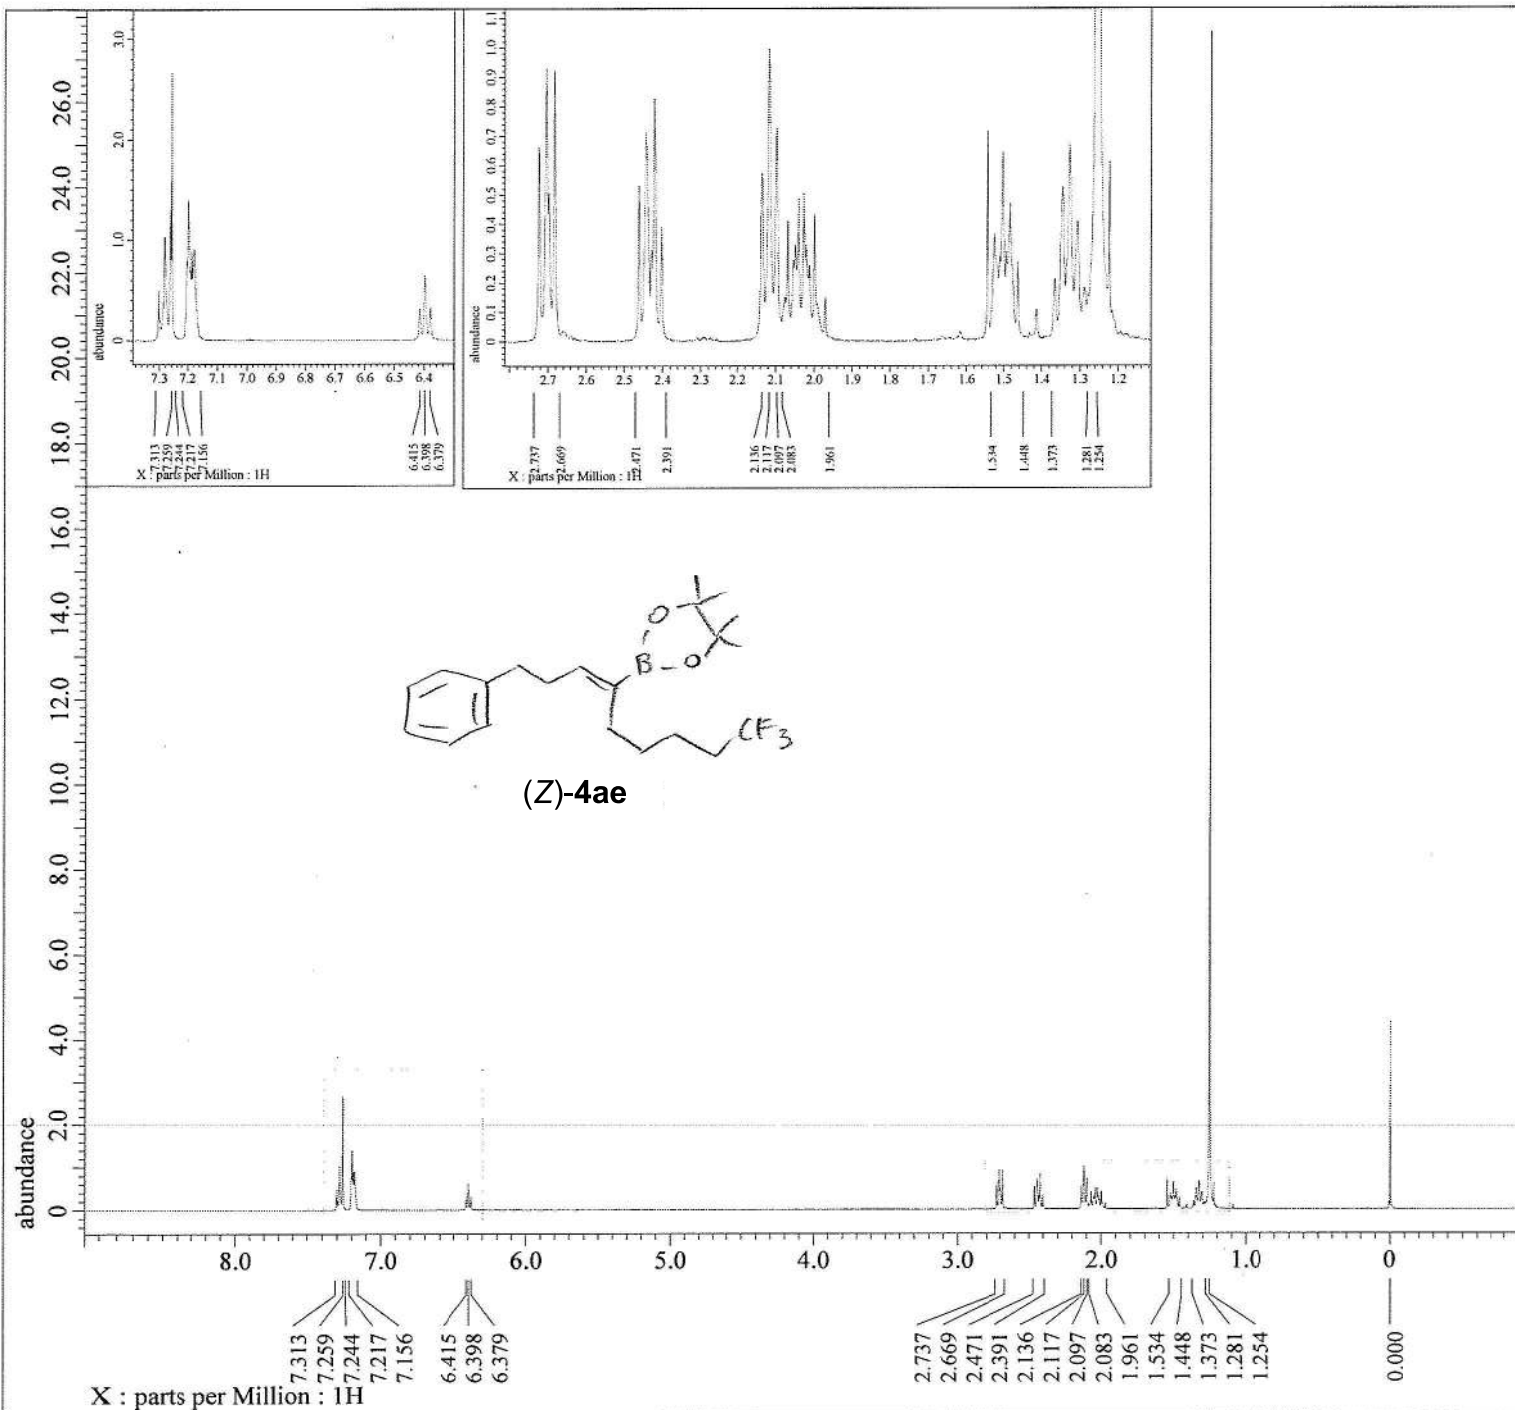

```

----- PROCESSING PARAMETERS -----
dc_balance( 0, FALSE )
sexp( 0.2[Hz], 0.0[s] )
trapezoid3( 0[%], 80[%], 100[%] )
zerofill( 1, TRUE )
fft( 1, TRUE, TRUE )
machinephase
ppm

```

Derived from: EDK-421 pure 1H-1.jdf

```

Filename      = EDK-421 pure 1H-2.jdf
Author       = element
Experiment   = single_pulse.ex2
Sample_Id    = S#476803
Solvent      = CHLOROFORM-D
Actual_Start_Time = 8-APR-2020 20:26:34
Revision_Time   = 16-JAN-2022 14:27:59

```

```

Comment      = single_pulse
Data Format   = 1D COMPLEX
Dim Size     = 13107
X_Domain     = 1H
Dim_Title    = 1H
Dim_Units    = [ppm]
Dimensions   = X
Site         = ECS 400
Spectrometer = JNM-ECS400

```

```

Field Strength = 9.20197068[T] (390[MHz])
X_Acq_Duration = 2.228224[s]
X_Domain       = 1H
X_Freq         = 391.78655441 [MHz]
X_Offset       = 5[ppm]
X_Points       = 16384
X_Prescans     = 1
X_Resolution   = 0.44878791 [Hz]
X_Sweep        = 7.35294118 [kHz]
Irr_Domain     = 1H
Irr_Freq       = 391.78655441 [MHz]
Irr_Offset     = 5[ppm]
Tri_Domain     = 1H
Tri_Freq       = 391.78655441 [MHz]
Tri_Offset     = 5[ppm]
Clipped        = FALSE
Scans          = 8
Total_Scans    = 8

```

```

Relaxation_Delay = 5[s]
Recvr_Gain       = 44
Temp_Get         = 20.9 [dC]
X_90_Width       = 11.04 [us]
X_Acq_Time       = 2.228224 [s]
X_Angle          = 45 [deg]
X_Atn            = 1.9 [dB]
X_Pulse          = 5.52 [us]
Irr_Mode         = Off
Tri_Mode         = Off
Dante_Preset     = FALSE
Initial_Wait     = 1 [s]
Repetition_Time  = 7.228224 [s]

```

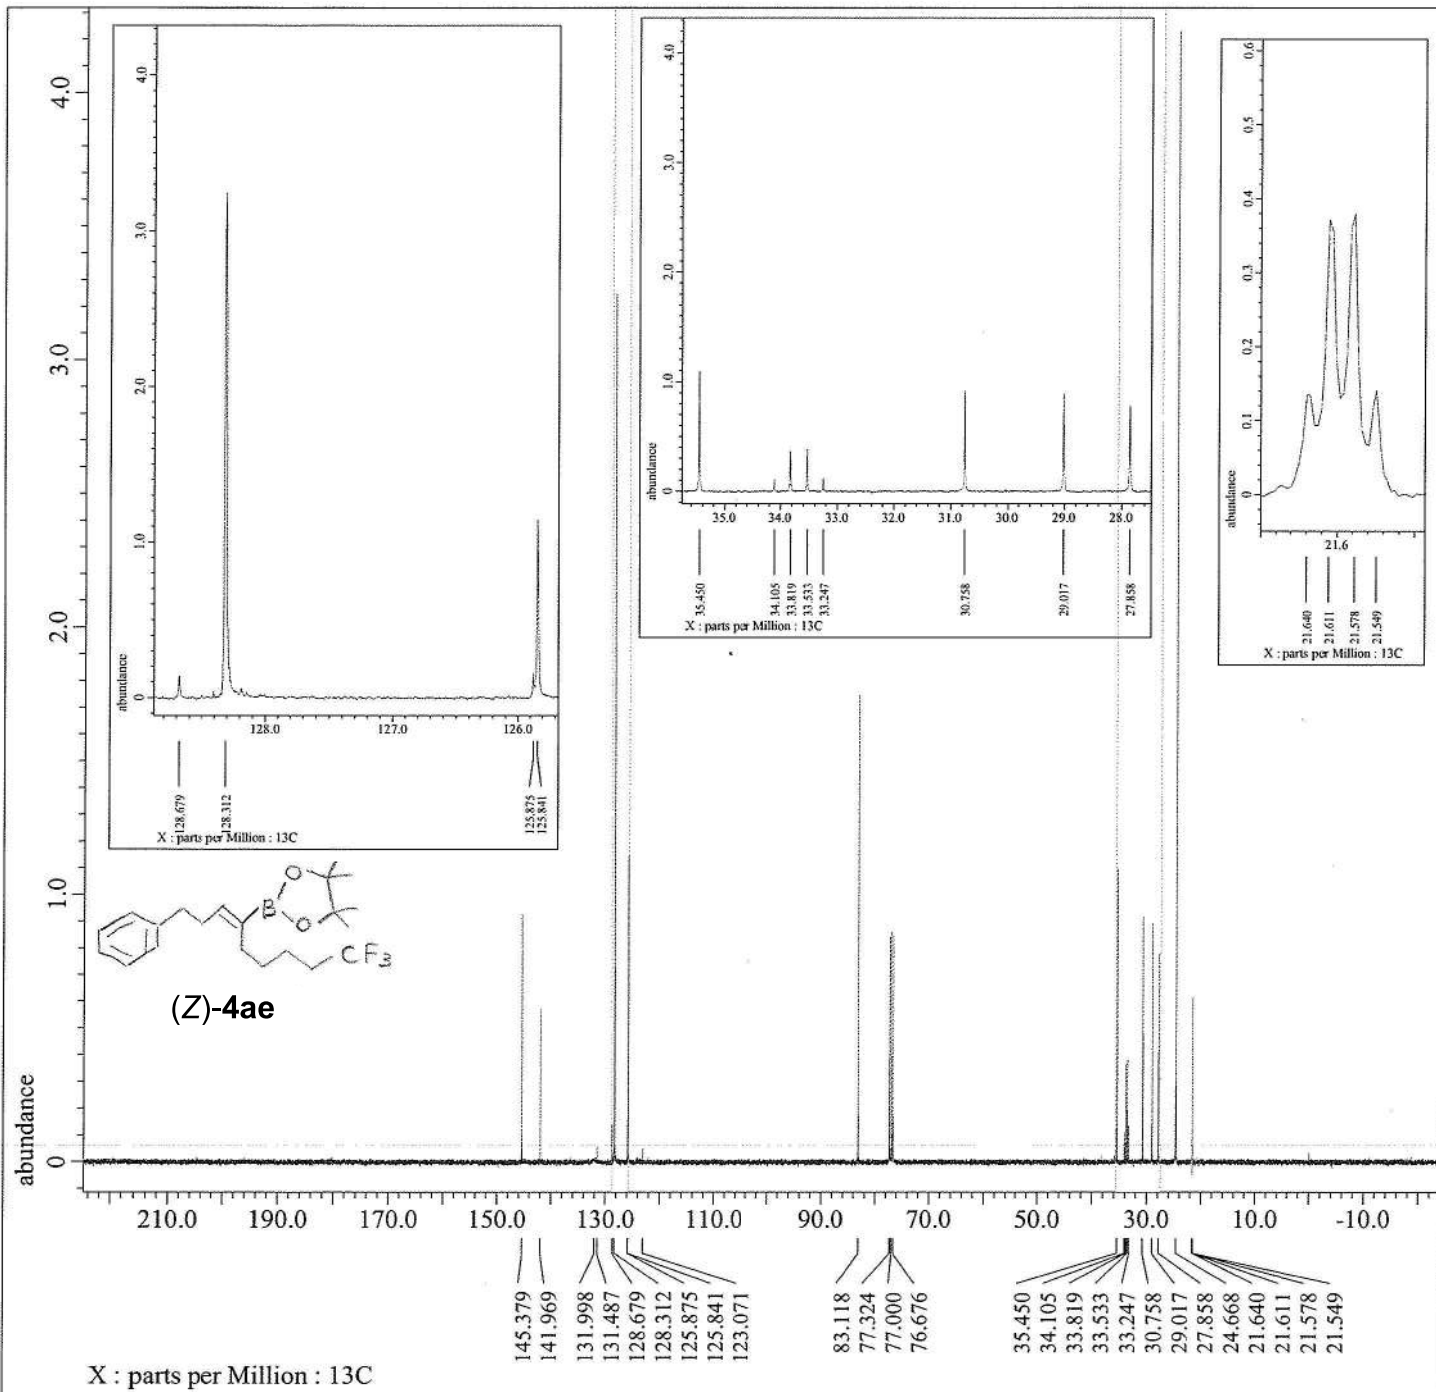

----- PROCESSING PARAMETERS -----  
 dc\_balance( 0, FALSE )  
 sexp( 0.5[Hz], 0.0[s] )  
 trapezoid3( 0[%], 80[%], 100[%] )  
 zerofill( 2 )  
 fft( 1, TRUE, TRUE )  
 machinephase  
 ppm

Derived from: EDK-421 pure 13C-1.jdf

Filename = EDK-421 pure 13C-2.jdf  
 Author = element  
 Experiment = single\_pulse\_dec  
 Sample\_Id = S#488407  
 Solvent = CHLOROFORM-D  
 Actual\_Start\_Time = 8-APR-2020 20:44:53  
 Revision\_Time = 8-APR-2020 14:22:17

Comment = single pulse decoupled  
 Data\_Format = 1D COMPLEX  
 Dim\_Size = 52428  
 X\_Domain = 13C  
 Dim\_Title = 13C  
 Dim\_Units = [ppm]  
 Dimensions = X  
 Site = ECS 400  
 Spectrometer = JNM-ECS400

Field\_Strength = 9.20197068[T] (390[MHz])  
 X\_Acq\_Duration = 1.06430464[s]  
 X\_Domain = 13C  
 X\_Freq = 98.51479726[MHz]  
 X\_Offset = 100[ppm]  
 X\_Points = 32768  
 X\_Prescans = 4  
 X\_Resolution = 0.93958061[Hz]  
 X\_Sweep = 30.78817734[kHz]  
 Irr\_Domain = 1H  
 Irr\_Freq = 391.78655441[MHz]  
 Irr\_Offset = 5[ppm]  
 Clipped = FALSE  
 Scans = 200  
 Total\_Scans = 200

Relaxation\_Delay = 2[s]  
 Recvr\_Gain = 60  
 Temp\_Get = 21.2[dC]  
 X\_90\_Width = 9.11[us]  
 X\_Acq\_Time = 1.06430464[s]  
 X\_Angle = 30[deg]  
 X\_Atn = 4.9[dB]  
 X\_Pulse = 3.03666667[us]  
 Irr\_Atn\_Dec = 22.255[dB]  
 Irr\_Atn\_Noise = 22.255[dB]  
 Irr\_Noise = WALTZ  
 Decoupling = TRUE  
 Initial\_Wait = 1[s]

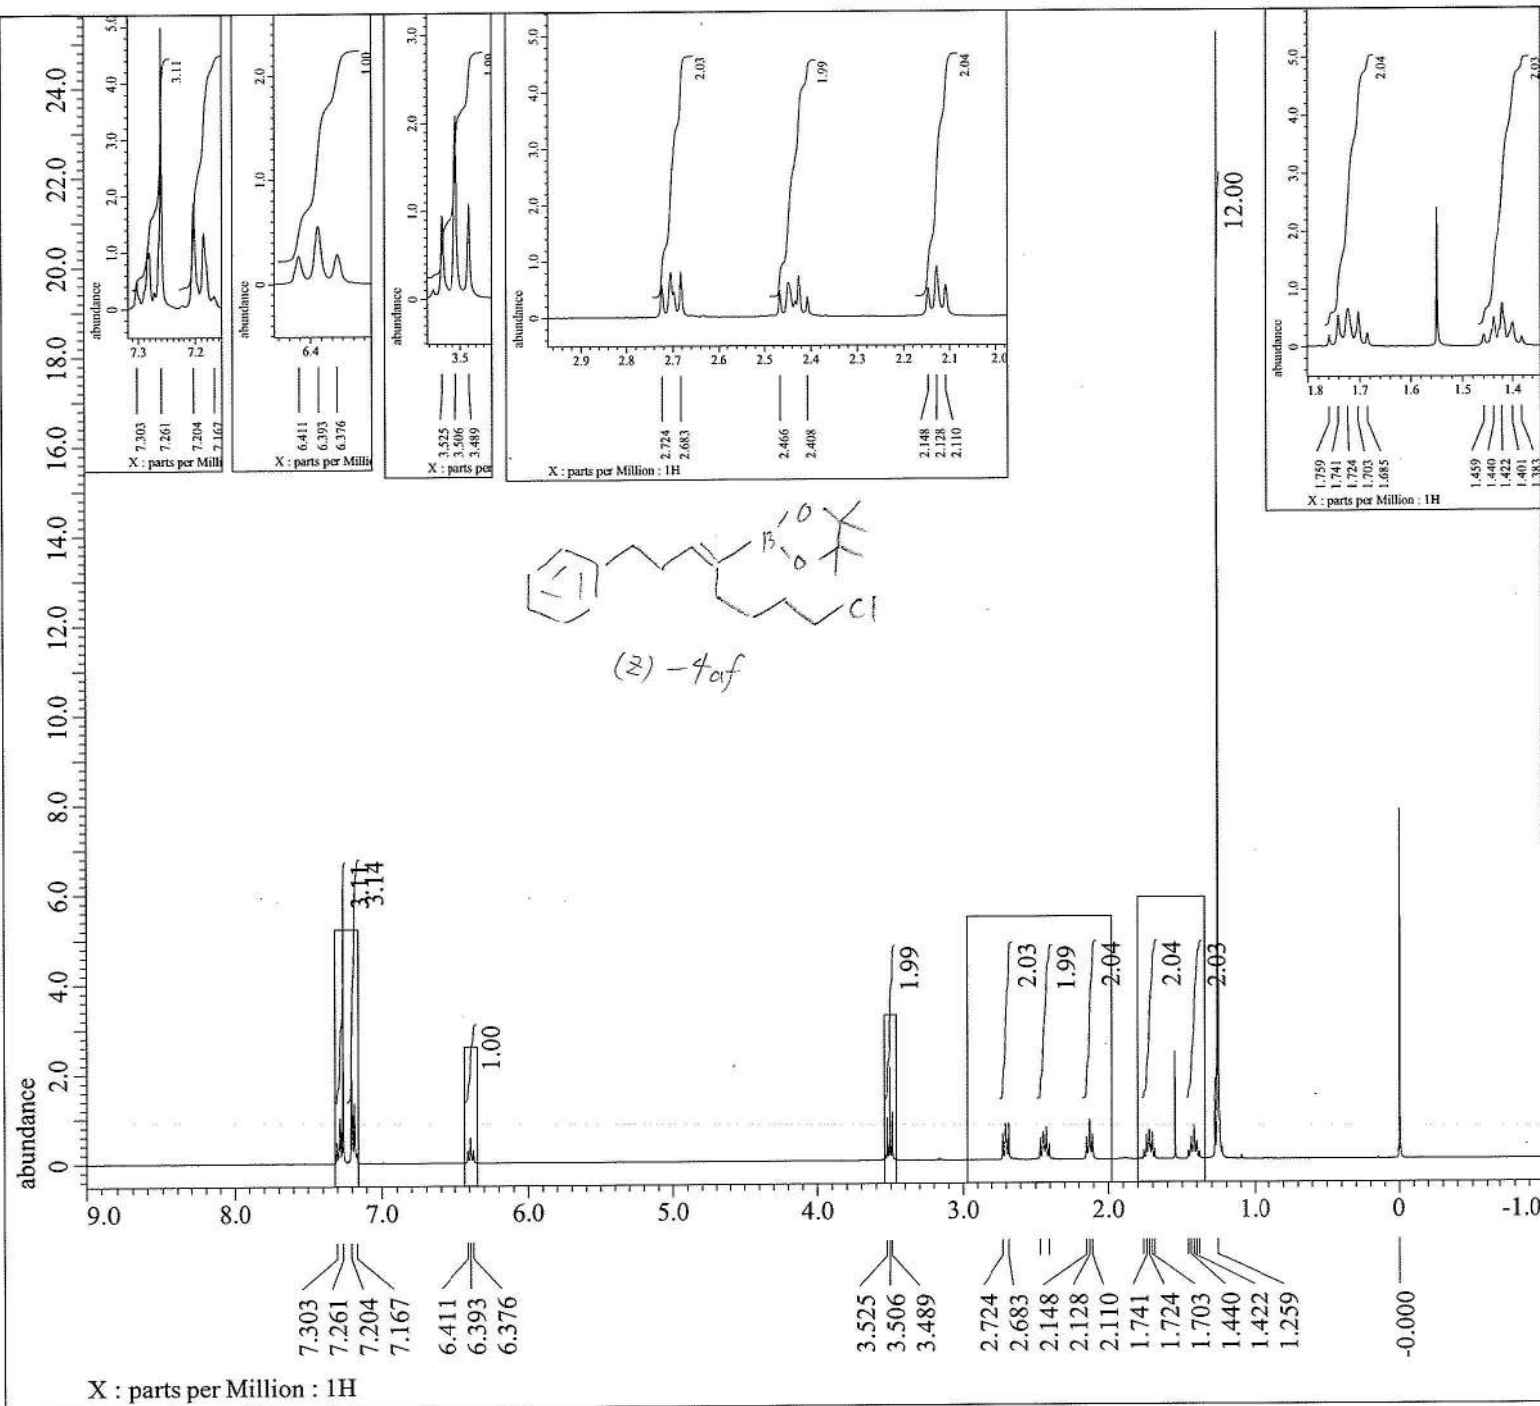

```

---- PROCESSING PARAMETERS ----
dc_balance( 0, FALSE )
sexp( 0.2[Hz], 0.0[s] )
trapezoid3( 0[%], 80[%], 100[%] )
zerofill( 1 )
fft( 1, TRUE, TRUE )
machinephase
ppm

以下に由来: IC3C1 C-B-2.jdf

Filename      = IC3C1 C-B-4.jdf
Author        = element
Experiment    = single_pulse.ex2
Sample_Id     = S#378755
Solvent       = CHLOROFORM-D
Actual_Start_Time = 2-JUL-2021 17:10:52
Revision_Time  = 5-JUL-2021 21:19:49

Comment       = single_pulse
Data_Format   = 1D_COMPLEX
Dim_Size      = 13107
Dim_Title     = 1H
Dim_Units     = [ppm]
Dimensions    = X
Site          = ECS 400
Spectrometer  = JNM-ECS400

Field_Strength = 9.20197068[T] (390[MHz])
X_Acq_Duration = 2.228224[s]
X_Domain       = 1H
X_Freq         = 391.78655441[MHz]
X_Offset       = 5[ppm]
X_Points       = 16384
X_Prescans     = 1
X_Resolution   = 0.44878791[Hz]
X_Sweep        = 7.35294118[kHz]
Irr_Domain     = 1H
Irr_Freq       = 391.78655441[MHz]
Irr_Offset     = 5[ppm]
Tri_Domain     = 1H
Tri_Freq       = 391.78655441[MHz]
Tri_Offset     = 5[ppm]
Clipped        = FALSE
Scans          = 8
Total_Scans    = 8

Relaxation_Delay = 5[s]
Recvr_Gain       = 50
Temp_Get         = 19.6[dC]
X_90_Width      = 10.8[us]
X_Acq_Time       = 2.228224[s]
X_Angle         = 45[deg]
X_Atn           = 1.9[dB]
X_Pulse         = 5.4[us]
Irr_Mode        = Off
Tri_Mode        = Off
Dante_Presat    = FALSE
Initial_Wait    = 1[s]
Repetition_Time = 7.228224[s]

```

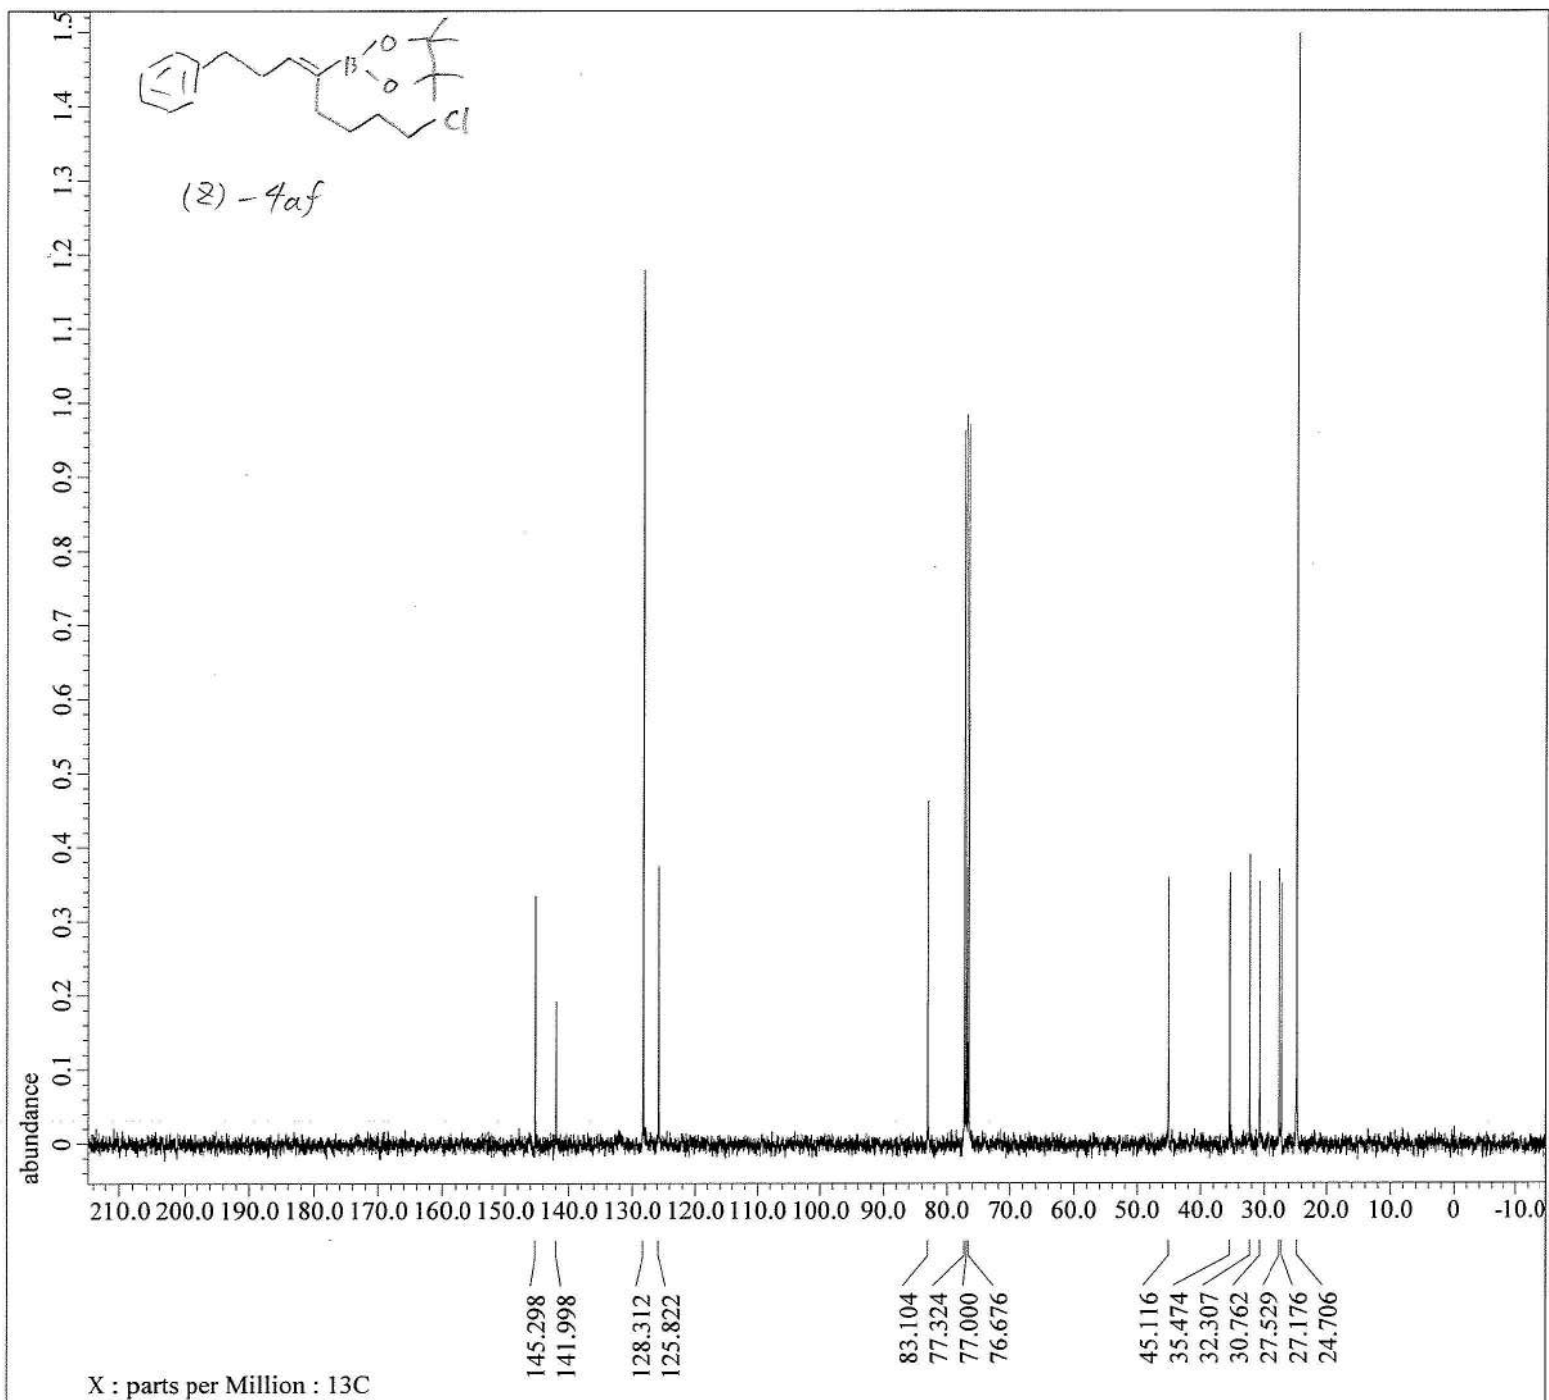

```

---- PROCESSING PARAMETERS ----
dc_balance( 0, FALSE )
sexp( 2.0[Hz], 0.0[s] )
trapezoid3( 0[%], 80[%], 100[%] )
zerofill( 1 )
fft( 1, TRUE, TRUE )
machinephase
ppm

```

以下に由来: SRT IC3C1 C-B 13C-2.jdf

```

Filename      = SRT IC3C1 C-B 13C-4.jdf
Author        = element
Experiment    = single_pulse_dec
Sample_Id     = 1
Solvent       = CHLOROFORM-D
Actual_Start_Time = 8-JUL-2021 02:16:24
Revision_Time  = 8-JUL-2021 10:07:41

Comment       = single pulse decoupled ga
Data_Format   = 1D COMPLEX
Dim_Size      = 26214
Dim_Title     = 13C
Dim_Units     = [ppm]
Dimensions    = X
Site          = ECS 400
Spectrometer  = JNM-ECS400

Field_Strength = 9.20197068[T] (390[MHz])
X_Acq_Duration = 1.06430464[s]
X_Domain       = 13C
X_Freq         = 98.51479726[MHz]
X_Offset       = 100[ppm]
X_Points       = 32768
X_Prescans     = 4
X_Resolution   = 0.93958061[Hz]
X_Sweep        = 30.78817734[kHz]
Irr_Domain     = 1H
Irr_Freq       = 391.78655441[MHz]
Irr_Offset     = 5[ppm]
Clipped        = FALSE
Scans          = 110
Total_Scans    = 110

Relaxation_Delay = 2[s]
Recvr_Gain       = 60
Temp_Get         = 20[dc]
X_90_Width      = 8.7[us]
X_Acq_Time       = 1.06430464[s]
X_Angle         = 30[deg]
X_Atn           = 4.9[dB]
X_Pulse         = 2.9[us]
Irr_Atn_Dec     = 22.45[dB]
Irr_Atn_No     = 22.45[dB]
Irr_Noise       = WALTZ
Decoupling      = TRUE
Initial_Wait    = 1[s]
Noe              = TRUE
Noe_Time        = 2[s]
Repetition_Time = 3.06430464[s]

```

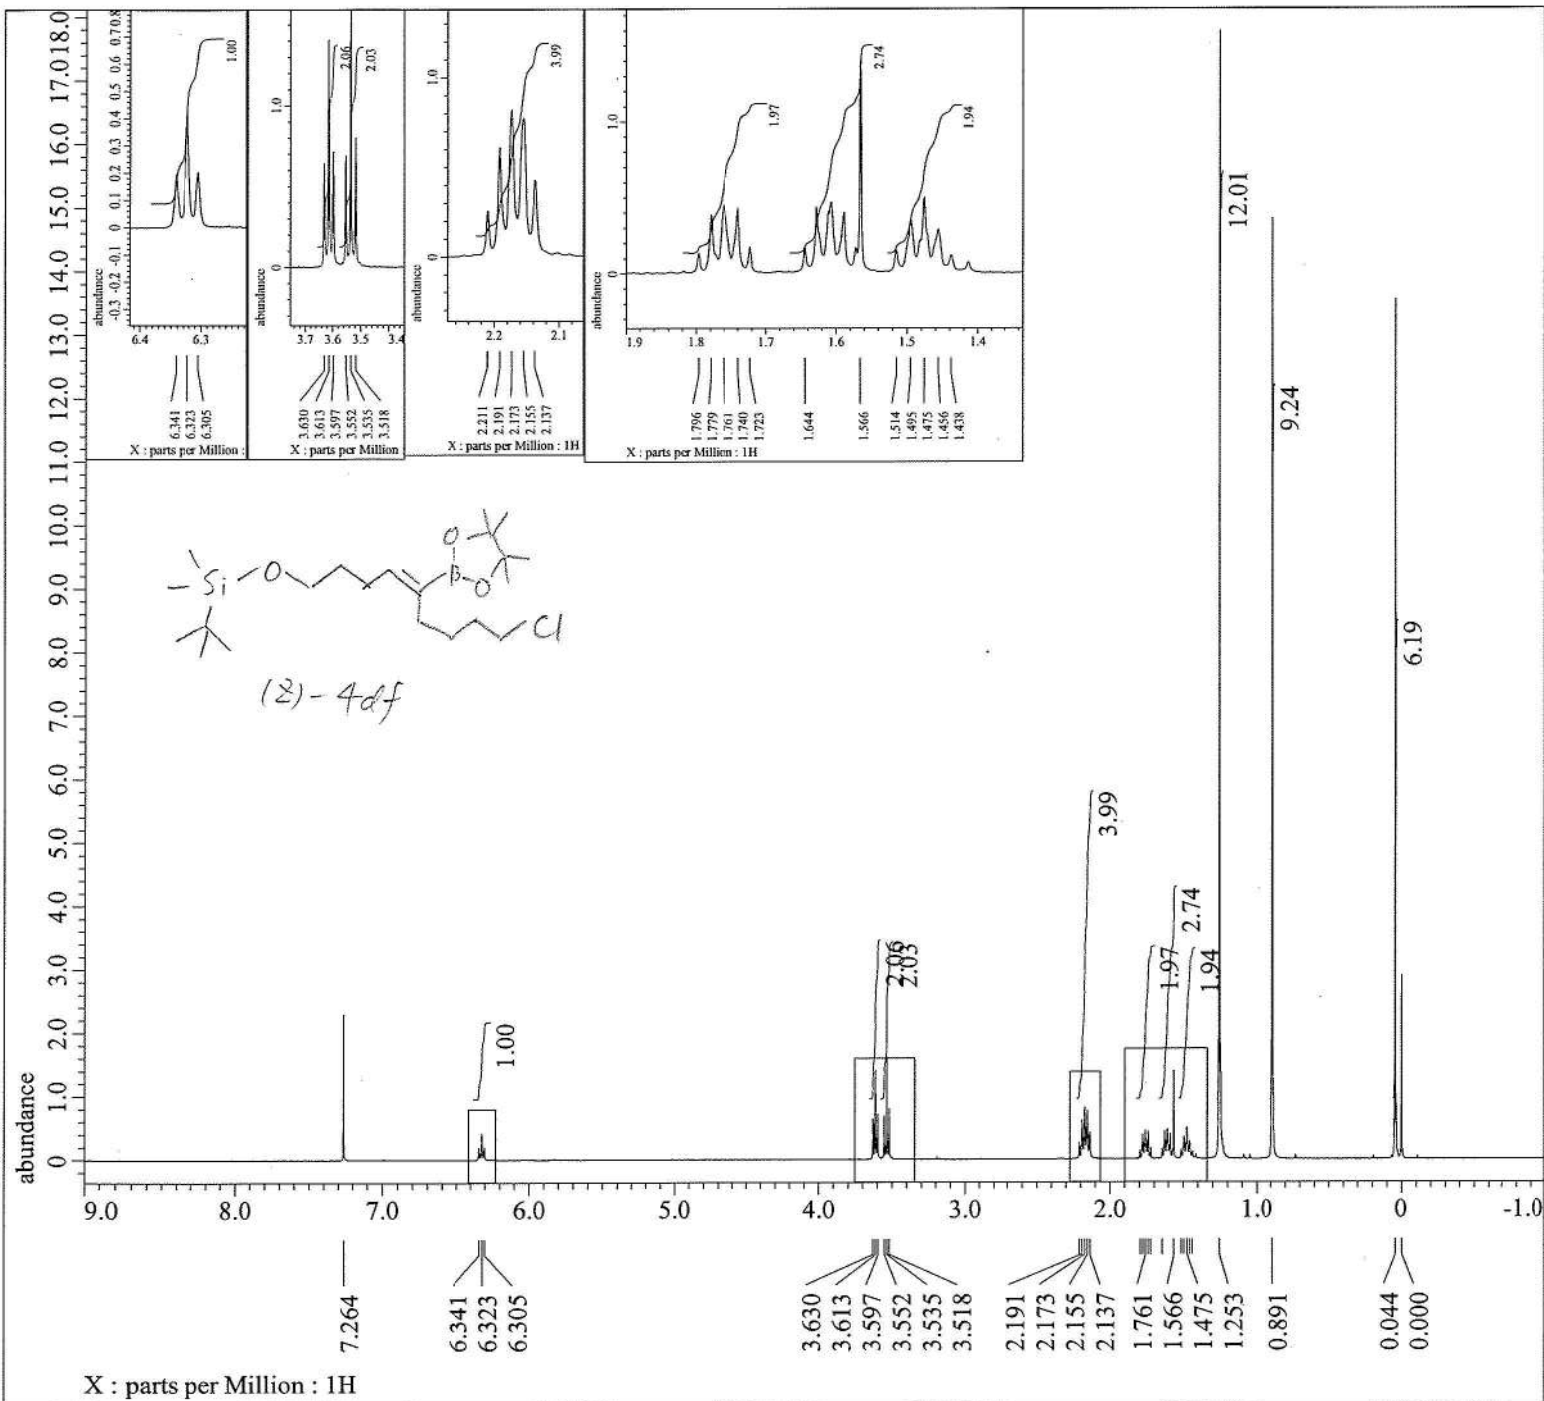

```

---- PROCESSING PARAMETERS ----
dc_balance( 0, FALSE )
sexp( 0.2[Hz], 0.0[s] )
trapezoid3( 0[%], 80[%], 100[%] )
zerofill( 1 )
fft( 1, TRUE, TRUE )
machinephase
ppm
    
```

以下に由来: SRT OTBS IC3Cl C-B 2-2.jdf

```

Filename      = SRT OTBS IC3Cl C-B 2-4.jd
Author       = element
Experiment   = single_pulse.ex2
Sample_Id    = S#516894
Solvent      = CHLOROPFORM-D
Actual_Start_Time = 5-JUL-2021 21:21:34
Revision_Time  = 26-OCT-2021 18:58:33
    
```

```

Comment      = single_pulse
Data_Format  = 1D COMPLEX
Dim_Size     = 13107
Dim_Title    = 1H
Dim_Units    = [ppm]
Dimensions   = X
Site         = ECS 400
Spectrometer = JNM-ECS400
    
```

```

Field_Strength = 9.20197068[T] (390[MHz])
X_Acq_Duration = 2.228224[s]
X_Domain       = 1H
X_Freq         = 391.78655441[MHz]
X_Offset       = 5[ppm]
X_Points       = 16384
X_Prescans     = 1
X_Resolution   = 0.44878791[Hz]
X_Sweep        = 7.35294118[kHz]
Irr_Domain     = 1H
Irr_Freq       = 391.78655441[MHz]
Irr_Offset     = 5[ppm]
Tri_Domain     = 1H
Tri_Freq       = 391.78655441[MHz]
Tri_Offset     = 5[ppm]
Clipped       = FALSE
Scans          = 8
Total_Scans    = 8
    
```

```

Relaxation_Delay = 5[s]
Recvr_Gain       = 44
Temp_Get         = 18.4[dC]
X_90_Width      = 10.8[us]
X_Acq_Time       = 2.228224[s]
X_Angle         = 45[deg]
X_Atn           = 1.9[dB]
X_Pulse         = 5.4[us]
Irr_Mode        = Off
Tri_Mode        = Off
Dante_Presat    = FALSE
Initial_Wait    = 1[s]
Repetition_Time = 7.228224[s]
    
```



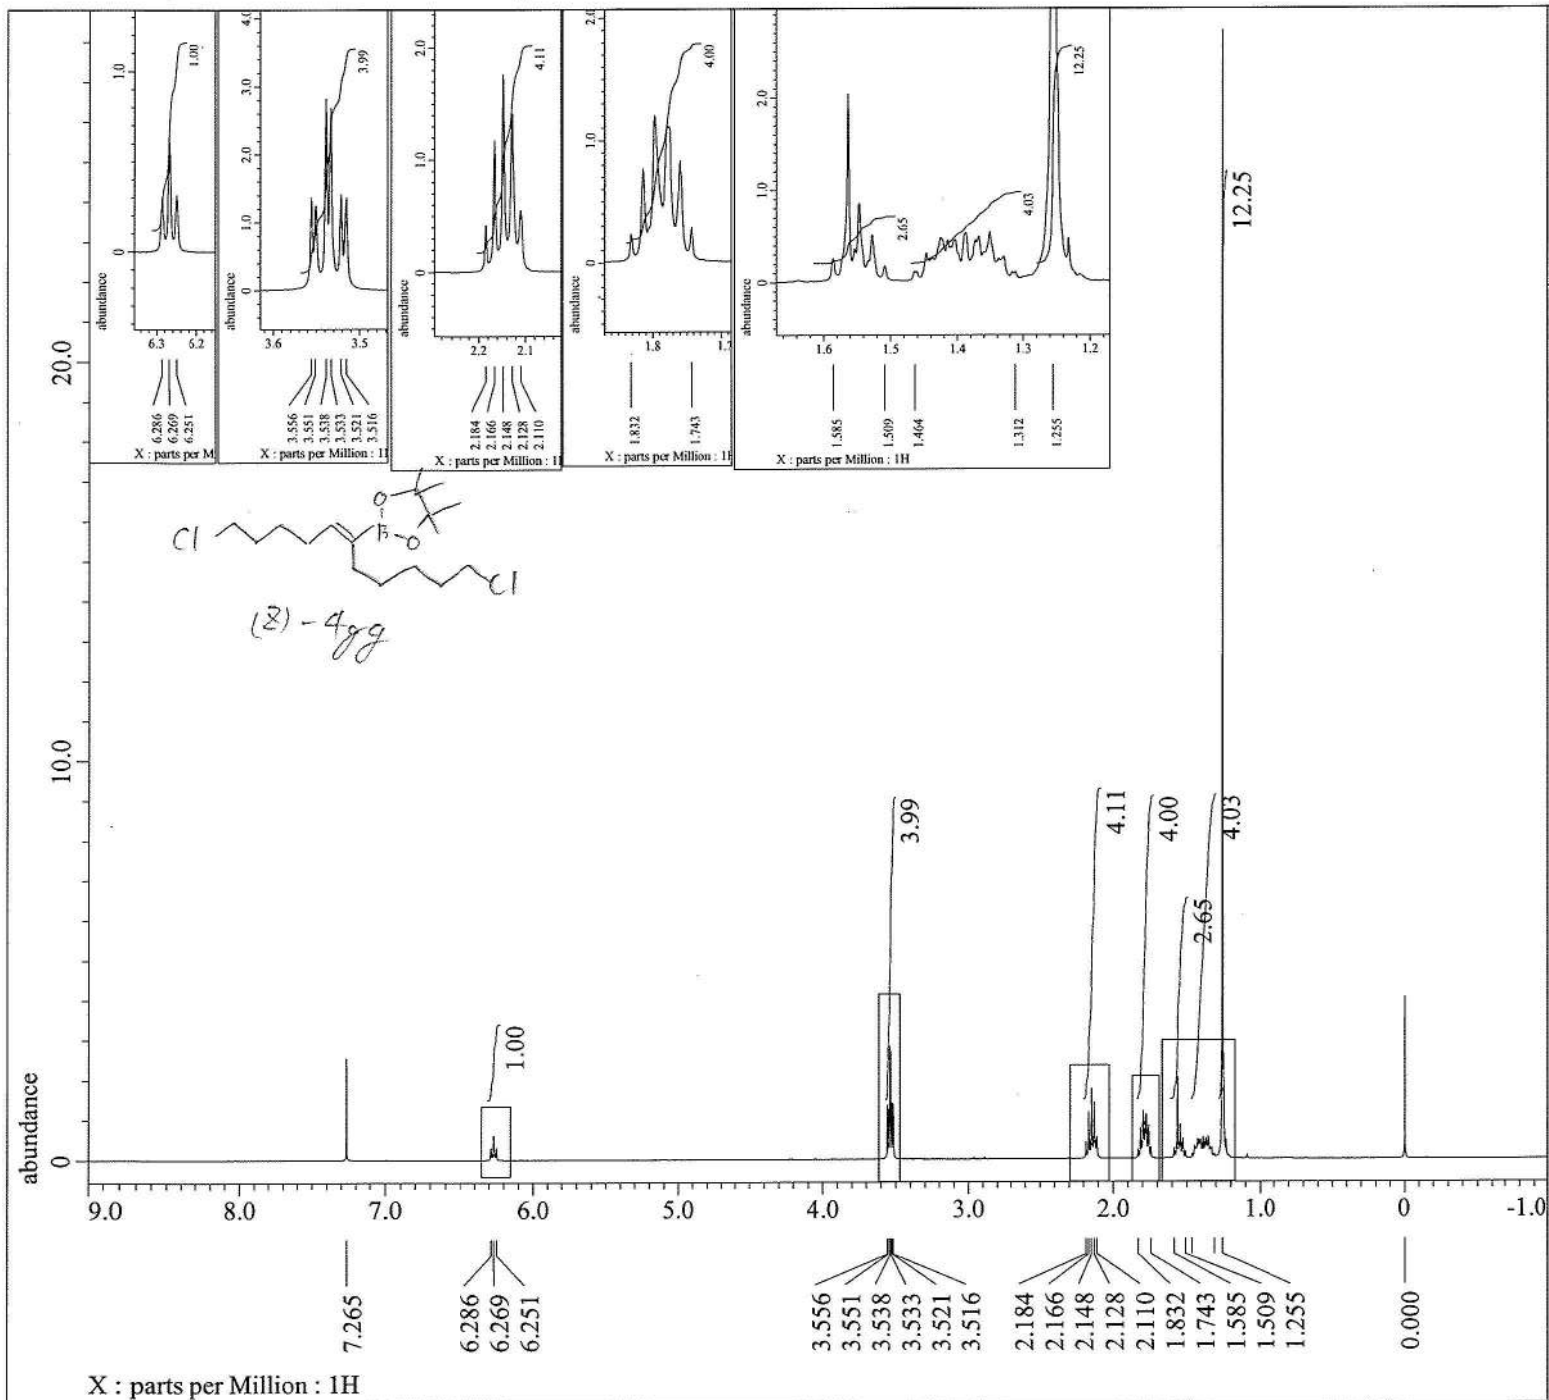

```

---- PROCESSING PARAMETERS ----
dc_balance( 0, FALSE )
sexp( 0.2[Hz], 0.0[s] )
trapezoid3( 0[%], 80[%], 100[%] )
zerofill( 1 )
fft( 1, TRUE, TRUE )
machinephase
ppm

以下に由来: SRT 093 C-B C4Cl IC4Cl-2.jdf

Filename      = SRT 093 C-B C4Cl IC4Cl-4.
Author        = element
Experiment    = single_pulse.ex2
Sample_Id     = S#491404
Solvent       = CHLOROFORM-D
Actual_Start_Time = 5-JUL-2021 20:39:07
Revision_Time = 26-OCT-2021 19:19:32

Comment       = single_pulse
Data Format    = 1D COMPLEX
Dim Size      = 13107
Dim Title     = 1H
Dim Units     = [ppm]
Dimensions    = X
Site          = ECS 400
Spectrometer  = JNM-ECS400

Field_Strength = 9.20197068[T] (390[MHz])
X_Acq_Duration = 2.228224[s]
X_Domain       = 1H
X_Freq         = 391.78655441[MHz]
X_Offset       = 5[ppm]
X_Points       = 16384
X_Prescans     = 1
X_Resolution   = 0.44878791[Hz]
X_Sweep        = 7.35294118[kHz]
Irr_Domain     = 1H
Irr_Freq       = 391.78655441[MHz]
Irr_Offset     = 5[ppm]
Tri_Domain     = 1H
Tri_Freq       = 391.78655441[MHz]
Tri_Offset     = 5[ppm]
Clipped       = FALSE
Scans          = 8
Total_Scans    = 8

Relaxation_Delay = 5[s]
Recvr_Gain      = 46
Temp_Get        = 18.1[dC]
X_90_Width     = 10.8[us]
X_Acq_Time     = 2.228224[s]
X_Angle        = 45[deg]
X_Atn          = 1.9[dB]
X_Pulse        = 5.4[us]
Irr_Mode       = Off
Tri_Mode       = Off
Dante_Presat   = FALSE
Initial_Wait   = 1[s]
Repetition_Time = 7.228224[s]
  
```

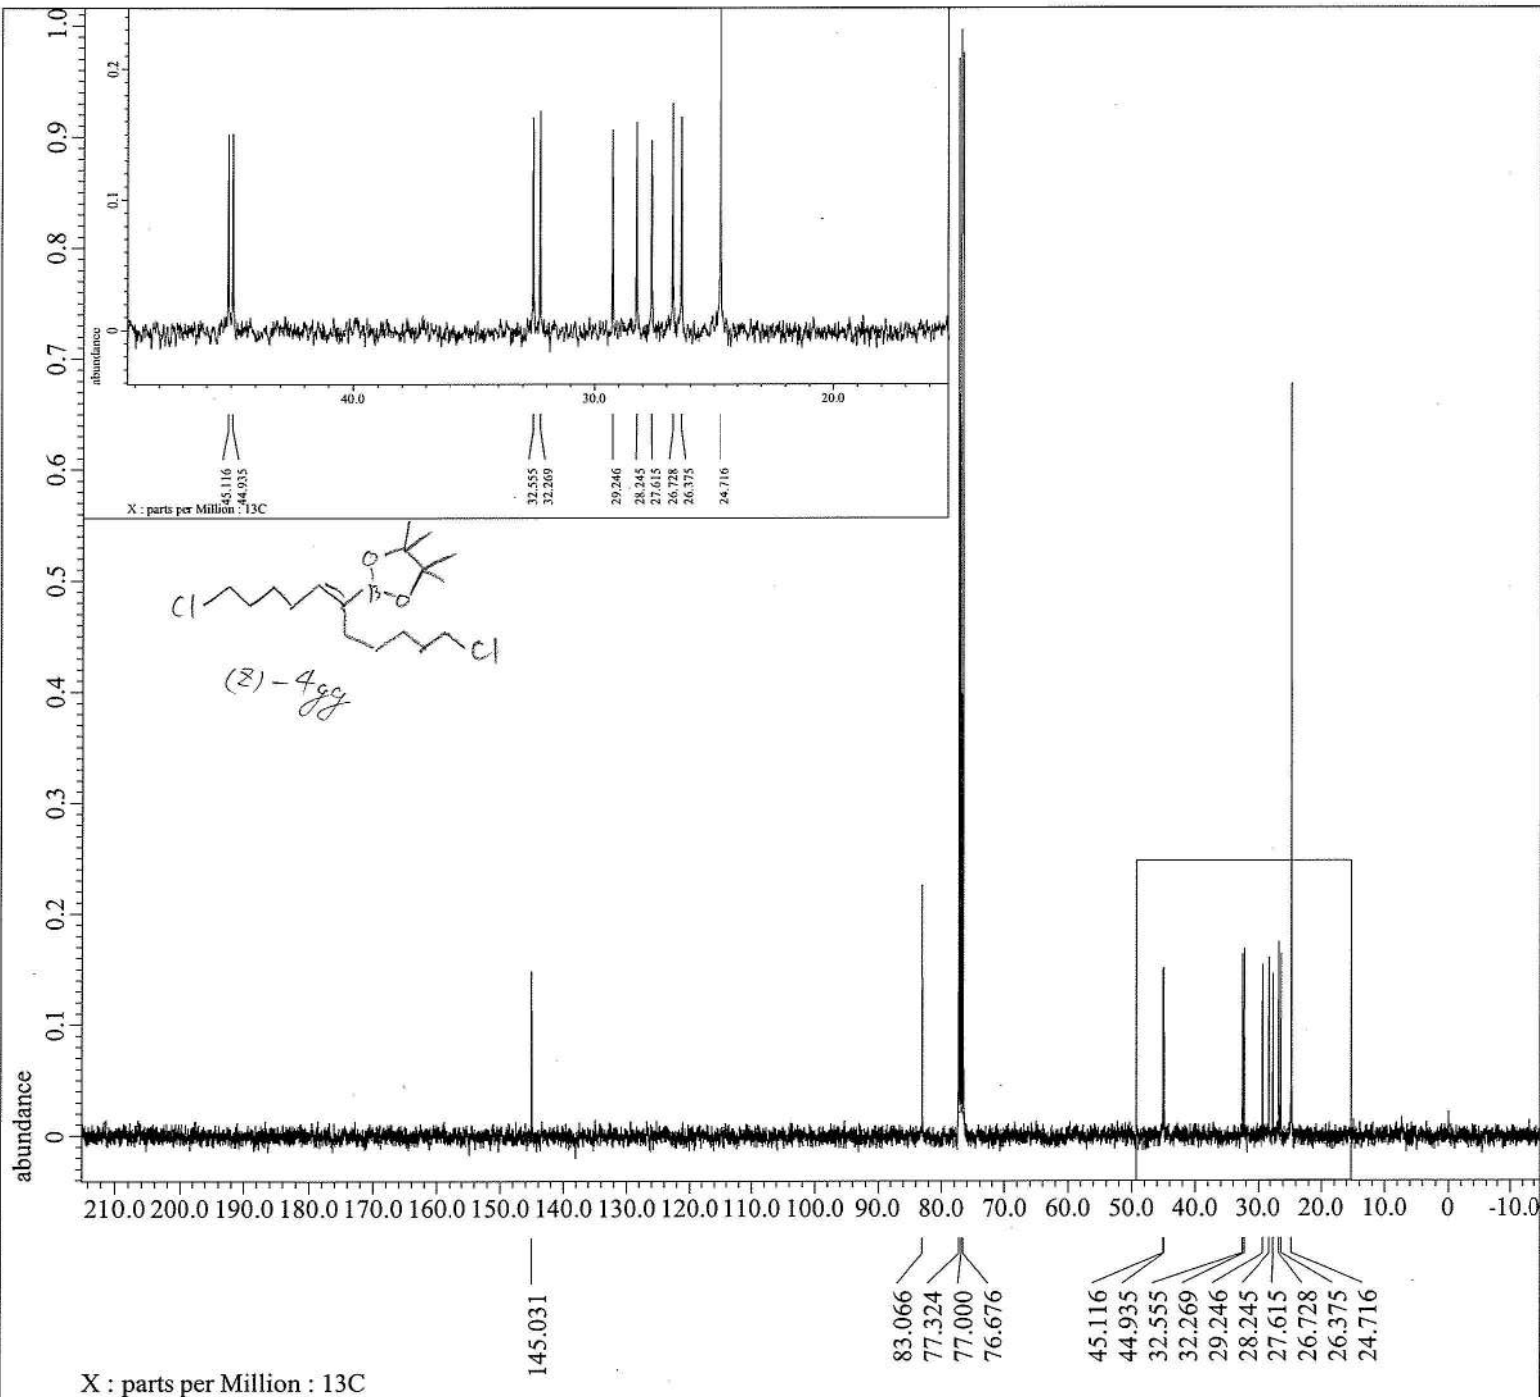

---- PROCESSING PARAMETERS ----  
 dc\_balance( 0, FALSE )  
 sexp( 2.0[Hz], 0.0[s] )  
 trapezoid3( 0[%], 80[%], 100[%] )  
 zerofill( 1 )  
 fft( 1, TRUE, TRUE )  
 machinephase  
 ppm

以下に由来: SRT 093 C4Cl IC4Cl 13C-2.jdf

Filename = SRT 093 C4Cl IC4Cl 13C-4.  
 Author = element  
 Experiment = single\_pulse\_dec  
 Sample\_Id = 1  
 Solvent = CHLOROFORM-D  
 Actual\_Start\_Time = 16-OCT-2021 03:49:16  
 Revision\_Time = 26-OCT-2021 19:50:57

Comment = single pulse decoupled ga  
 Data Format = 1D COMPLEX  
 Dim\_Size = 26214  
 Dim\_Title = 13C  
 Dim\_Units = [ppm]  
 Dimensions = X  
 Site = ECS 400  
 Spectrometer = JNM-ECS400

Field\_Strength = 9.20197068[T] (390[MHz])  
 X\_Acq\_Duration = 1.06430464[s]  
 X\_Domain = 13C  
 X\_Freq = 98.51479726[MHz]  
 X\_Offset = 100[ppm]  
 X\_Points = 32768  
 X\_Prescans = 4  
 X\_Resolution = 0.93958061[Hz]  
 X\_Sweep = 30.78817734[kHz]  
 Irr\_Domain = 1H  
 Irr\_Freq = 391.78655441[MHz]  
 Irr\_Offset = 5[ppm]  
 Clipped = FALSE  
 Scans = 200  
 Total\_Scans = 200

Relaxation\_Delay = 2[s]  
 Recvr\_Gain = 60  
 Temp\_Get = 20.4[dC]  
 X\_90\_Width = 8.7[us]  
 X\_Acq\_Time = 1.06430464[s]  
 X\_Angle = 30[deg]  
 X\_Atn = 4.9[dB]  
 X\_Pulse = 2.9[us]  
 Irr\_Atn\_Dec = 22.45[dB]  
 Irr\_Atn\_Noise = 22.45[dB]  
 Irr\_Noise = WALTZ  
 Decoupling = TRUE  
 Initial\_Wait = 1[s]  
 Noe = TRUE  
 Noe\_Time = 2[s]  
 Repetition\_Time = 3.06430464[s]



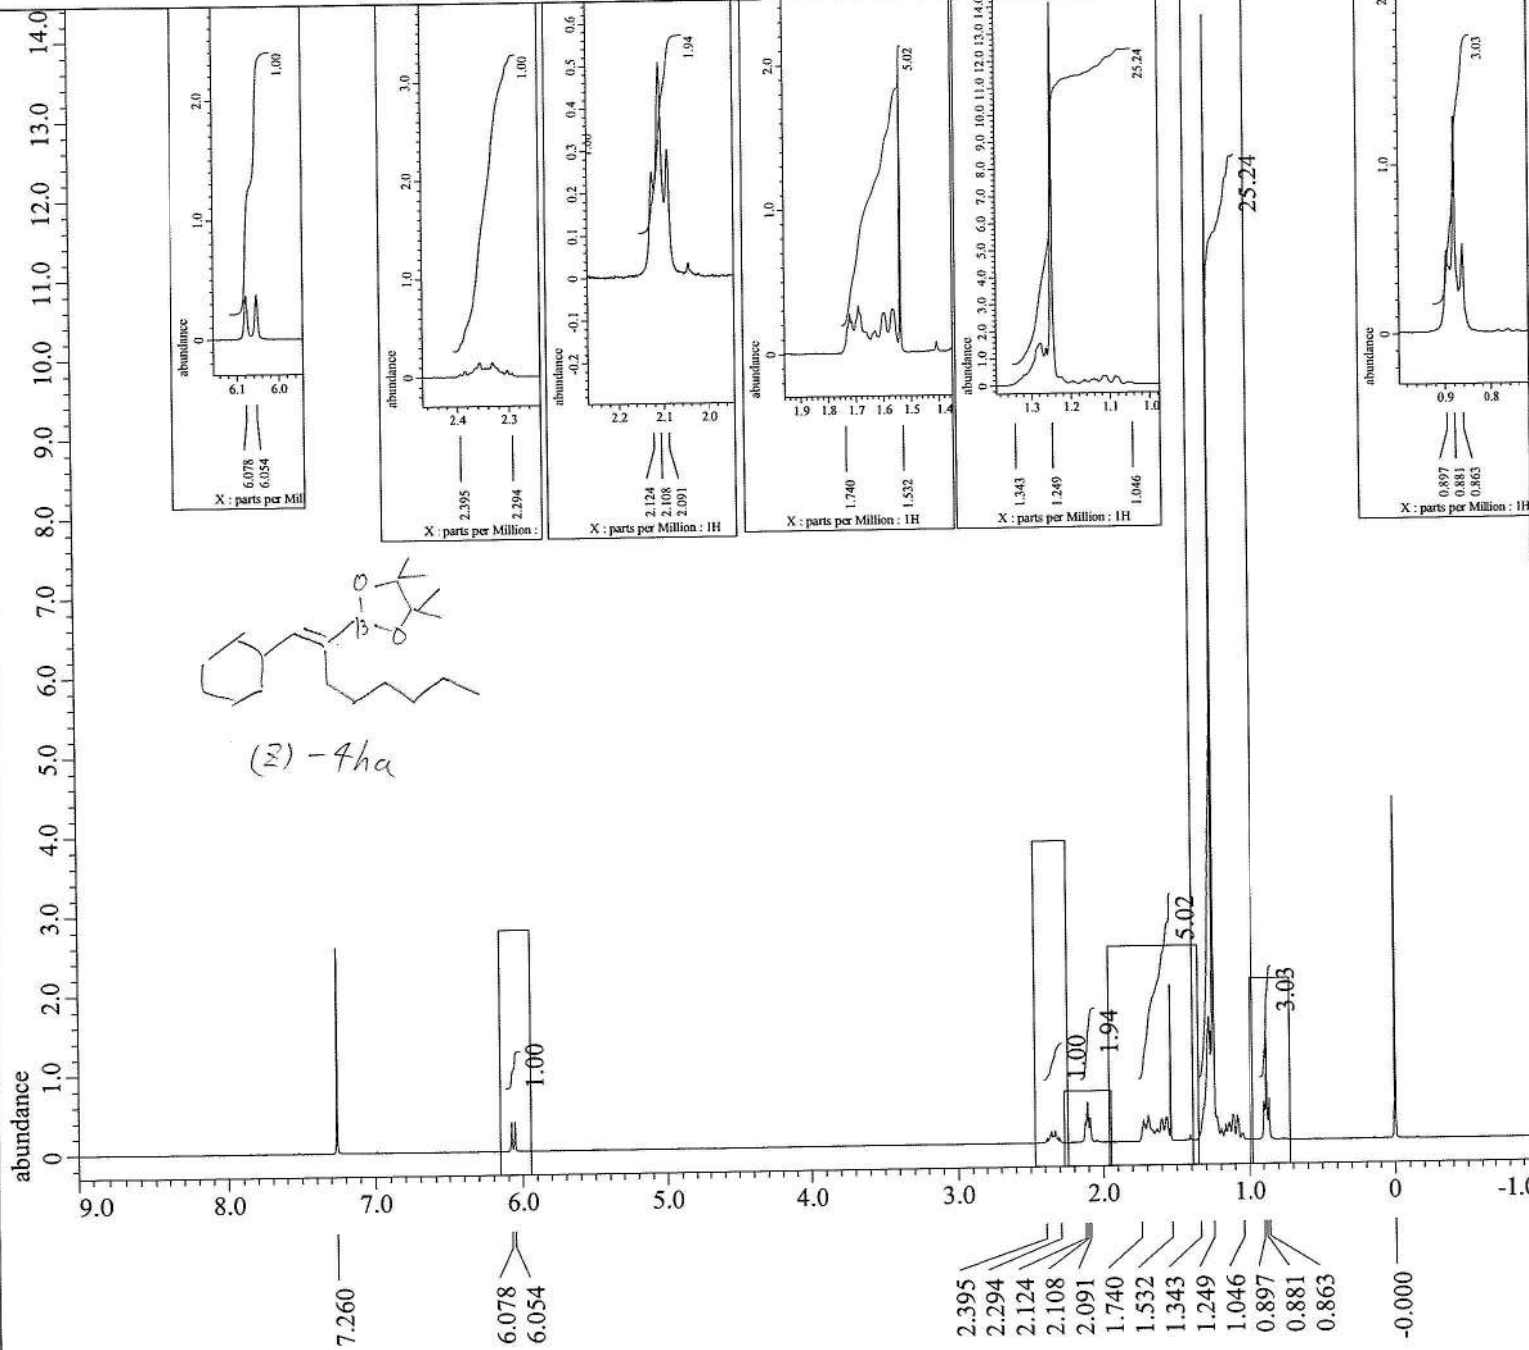

```

---- PROCESSING PARAMETERS ----
dc_balance( 0, FALSE )
sexp( 0.2[Hz], 0.0[s] )
trapezoid3( 0[%], 80[%], 100[%] )
zerofill( 1 )
fft( 1, TRUE, TRUE )
machinephase
ppm

以下に由来: Cy C-B column-2.jdf

Filename      = Cy C-B column-4.jdf
Author        = element
Experiment     = single_pulse.ex2
Sample_Id     = S#508289
Solvent       = CHLOROFORM-D
Actual_Start_Time = 29-JUN-2021 20:47:10
Revision_Time  = 2-OCT-2021 15:42:46

Comment       = single_pulse
Data_Format   = 1D COMPLEX
Dim_Size      = 13107
Dim_Title     = 1H
Dim_Units     = [ppm]
Dimensions    = X
Site          = ECS 400
Spectrometer  = JNM-ECS400

Field_Strength = 9.20197068[T] (390[MHz])
X_Acq_Duration = 2.228224[s]
X_Domain      = 1H
X_Freq        = 391.78655441[MHz]
X_Offset      = 5[ppm]
X_Points      = 16384
X_Prescans    = 1
X_Resolution  = 0.44878791[Hz]
X_Sweep       = 7.35294118[kHz]
Irr_Domain    = 1H
Irr_Freq      = 391.78655441[MHz]
Irr_Offset    = 5[ppm]
Tri_Domain    = 1H
Tri_Freq      = 391.78655441[MHz]
Tri_Offset    = 5[ppm]
Clipped       = FALSE
Scans         = 8
Total_Scans   = 8

Relaxation_Delay = 5[s]
Recvr_Gain       = 50
Temp_Get         = 23.3[dc]
X_90_Width      = 10.8[us]
X_Acq_Time      = 2.228224[s]
X_Angle         = 45[deg]
X_Atn           = 1.9[db]
X_Pulse         = 5.4[us]
Irr_Mode        = Off
Tri_Mode        = Off
Dante_Presat    = FALSE
Initial_Wait    = 1[s]
Repetition_Time = 7.228224[s]

```

X : parts per Million : 1H

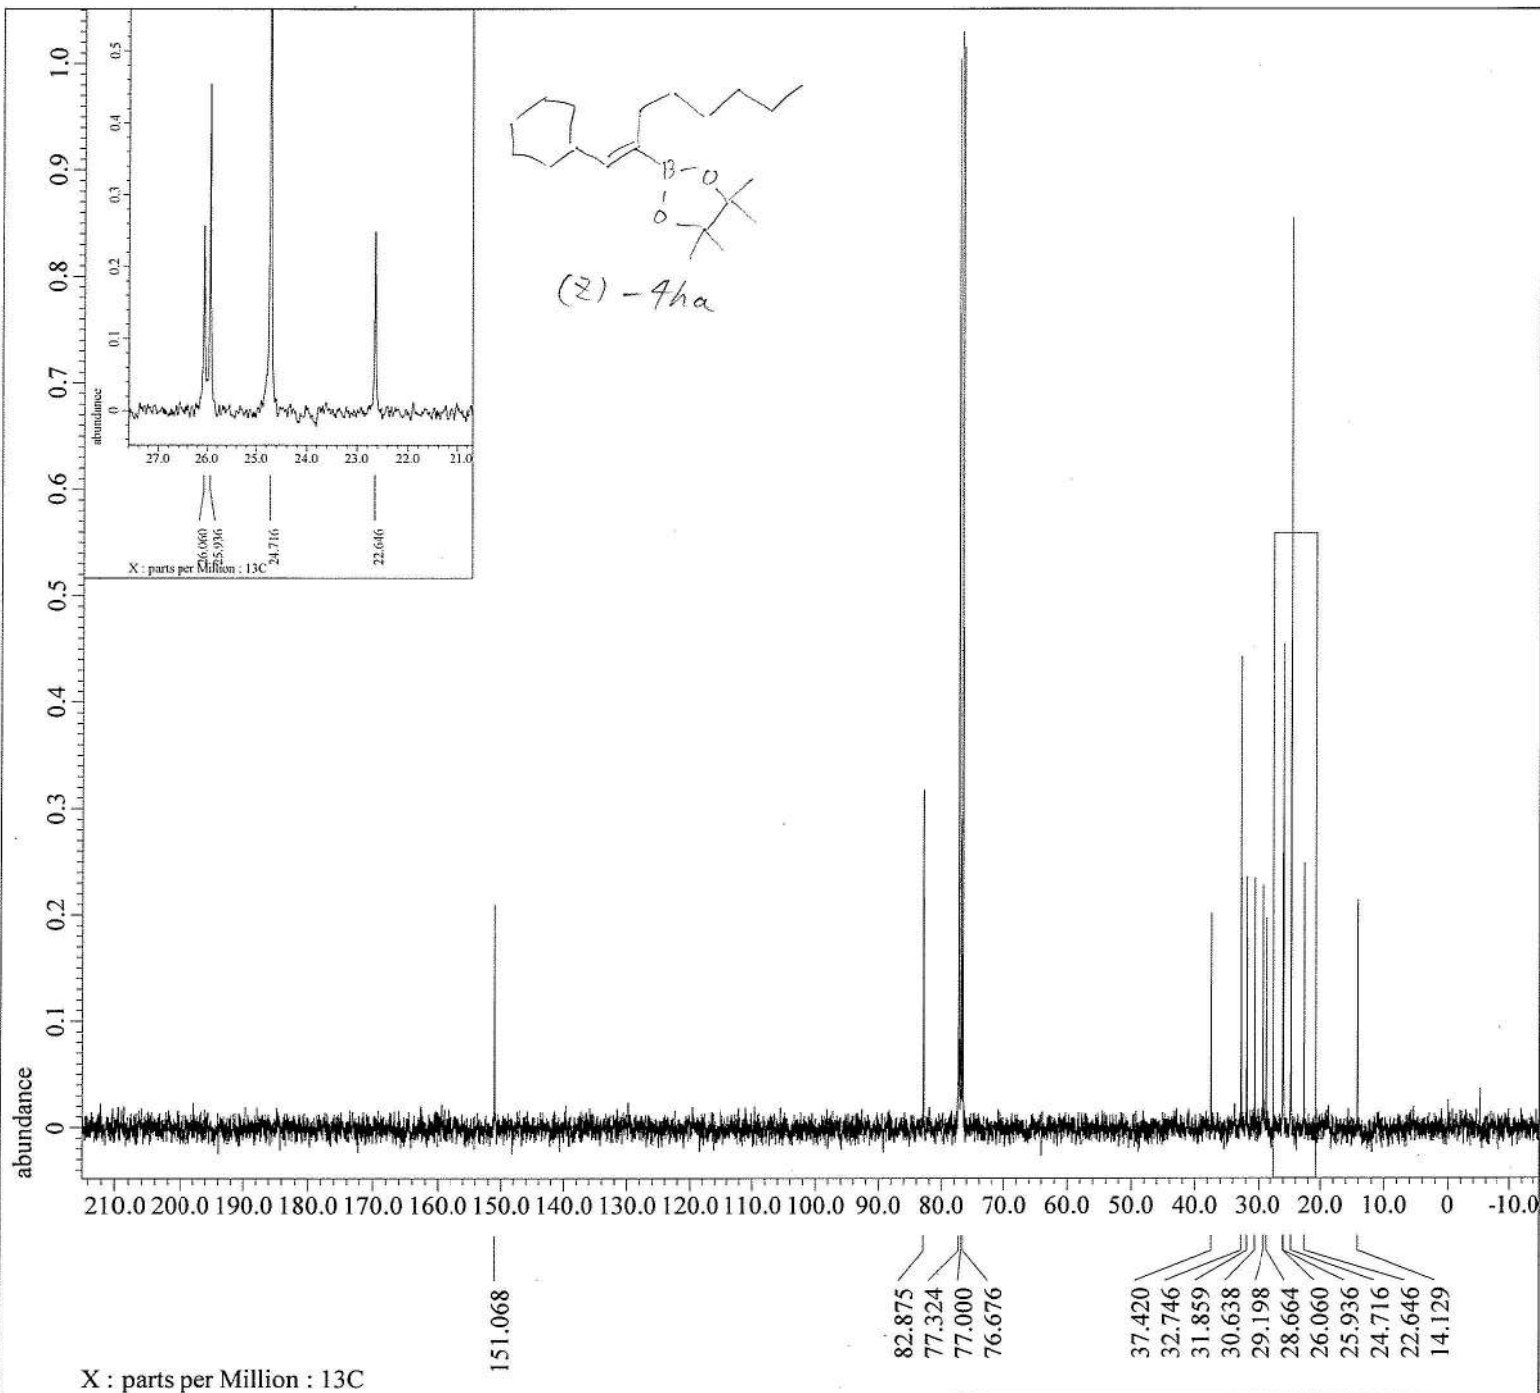

```

---- PROCESSING PARAMETERS ----
dc_balance( 0, FALSE )
sexp( 2.0[Hz], 0.0[s] )
trapezoid3( 0[%], 80[%], 100[%] )
zerofill( 1 )
fft( 1, TRUE, TRUE )
machinephase
ppm

以下に由来: SRT Cy C-B 13C-2.jdf
  
```

```

Filename      = SRT Cy C-B 13C-4.jdf
Author       = element
Experiment   = single_pulse_dec
Sample_Id    = 1
Solvent      = CHLOROFORM-D
Actual_Start Time = 8-JUL-2021 02:32:46
Revision_Time = 8-JUL-2021 09:03:17

Comment      = single pulse decoupled ga
Data Format   = 1D COMPLEX
Dim_Size     = 26214
Dim_Title    = 13C
Dim_Units    = [ppm]
Dimensions   = X
Site         = ECS 400
Spectrometer = JNM-ECS400
  
```

```

Field Strength = 9.20197068[T] (390[MHz])
X Acq_Duration = 1.06430464[s]
X Domain       = 13C
X_Freq         = 98.51479726[MHz]
X_Offset       = 100[ppm]
X_Points       = 32768
X_Prescans     = 4
X_Resolution   = 0.93958061[Hz]
X_Sweep        = 30.78817734[kHz]
Irr_Domain     = 1H
Irr_Freq       = 391.78655441[MHz]
Irr_Offset     = 5[ppm]
Clipped        = FALSE
Scans          = 98
Total_Scans    = 98
  
```

```

Relaxation_Delay = 2[s]
Recvr Gain       = 60
Temp_Get         = 20[dC]
X_90_Width       = 8.7[us]
X_Acq_Time       = 1.06430464[s]
X_Angle          = 30[deg]
X_Atn            = 4.9[dB]
X_Pulse          = 2.9[us]
Irr_Atn_Dec      = 22.45[dB]
Irr_Atn_Noise   = 22.45[dB]
Irr_Noise        = WALTZ
Decoupling       = TRUE
Initial_Wait     = 1[s]
Noe              = TRUE
Noe_Time         = 2[s]
Repetition_Time  = 3.06430464[s]
  
```

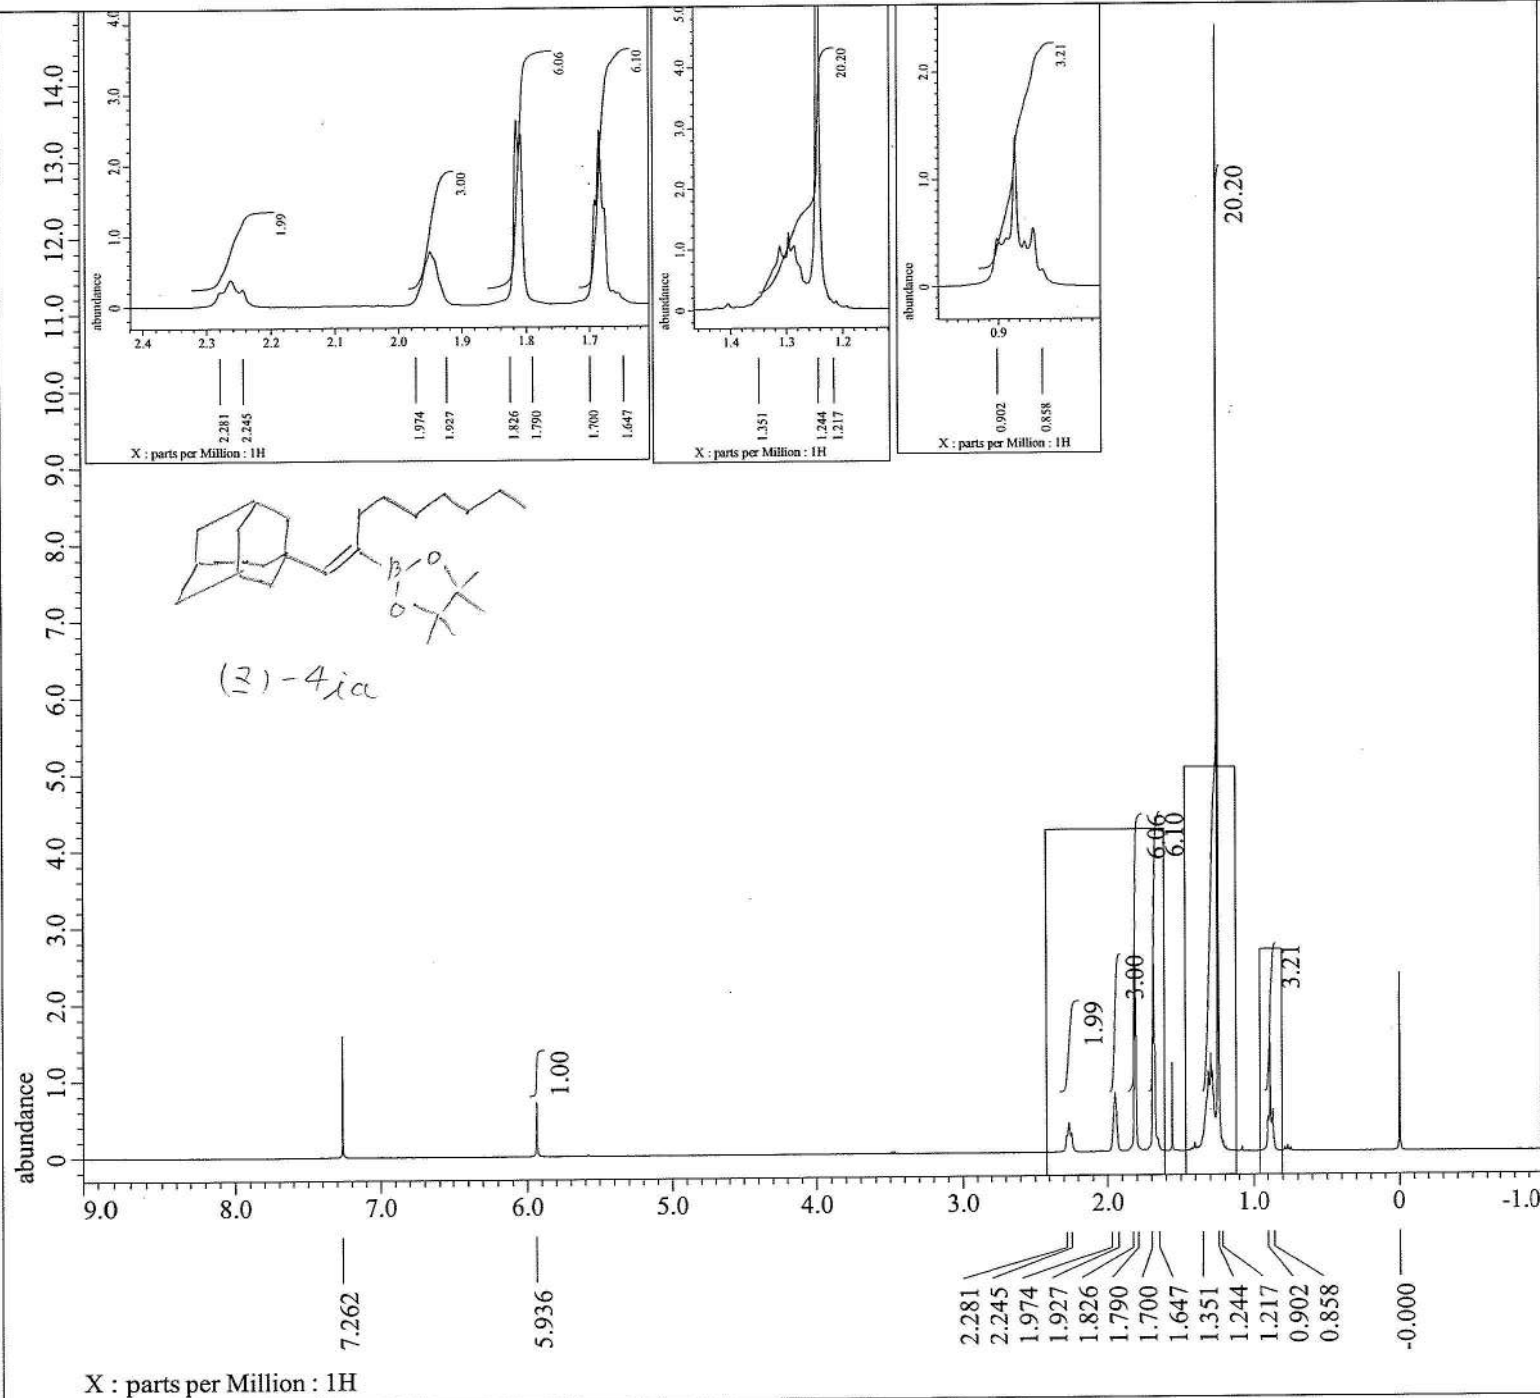

```

---- PROCESSING PARAMETERS ----
dc_balance( 0, FALSE )
sexp( 0.2[Hz], 0.0[s] )
trapezoid3( 0[%], 80[%], 100[%] )
zerofill( 1 )
fft( 1, TRUE, TRUE )
machinephase
ppm

以下に由来: SRT Ad C-B column-2.jdf

```

```

Filename      = SRT Ad C-B column-4.jdf
Author        = element
Experiment    = single_pulse.ex2
Sample_Id     = S#502671
Solvent       = CHLOROFORM-D
Actual_Start_Time = 7-JUL-2021 20:57:39
Revision_Time = 2-OCT-2021 18:22:11

```

```

Comment       = single_pulse
Data Format    = 1D COMPLEX
Dim Size      = 13107
Dim Title     = 1H
Dim Units     = [ppm]
Dimensions    = X
Site          = ECS 400
Spectrometer  = JNM-ECS400

```

```

Field Strength = 9.20197068[T] (390[MHz])
X Acq Duration = 2.228224[s]
X Domain       = 1H
X Freq         = 391.78655441[MHz]
X Offset       = 5[ppm]
X Points       = 16384
X Prescans     = 1
X Resolution   = 0.44878791[Hz]
X Sweep       = 7.35294118[kHz]
Irr Domain     = 1H
Irr Freq       = 391.78655441[MHz]
Irr Offset     = 5[ppm]
Tri Domain     = 1H
Tri Freq       = 391.78655441[MHz]
Tri Offset     = 5[ppm]
Clipped       = FALSE
Scans         = 8
Total Scans    = 8

```

```

Relaxation_Delay = 5[s]
Recvr Gain       = 44
Temp_Get         = 19.7[dC]
X 90 Width       = 10.8[us]
X Acq Time       = 2.228224[s]
X Angle          = 45[deg]
X Atn            = 1.9[dB]
X Pulse         = 5.4[us]
Irr Mode         = Off
Tri Mode         = Off
Dante Presat    = FALSE
Initial Wait     = 1[s]
Repetition_Time = 7.228224[s]

```

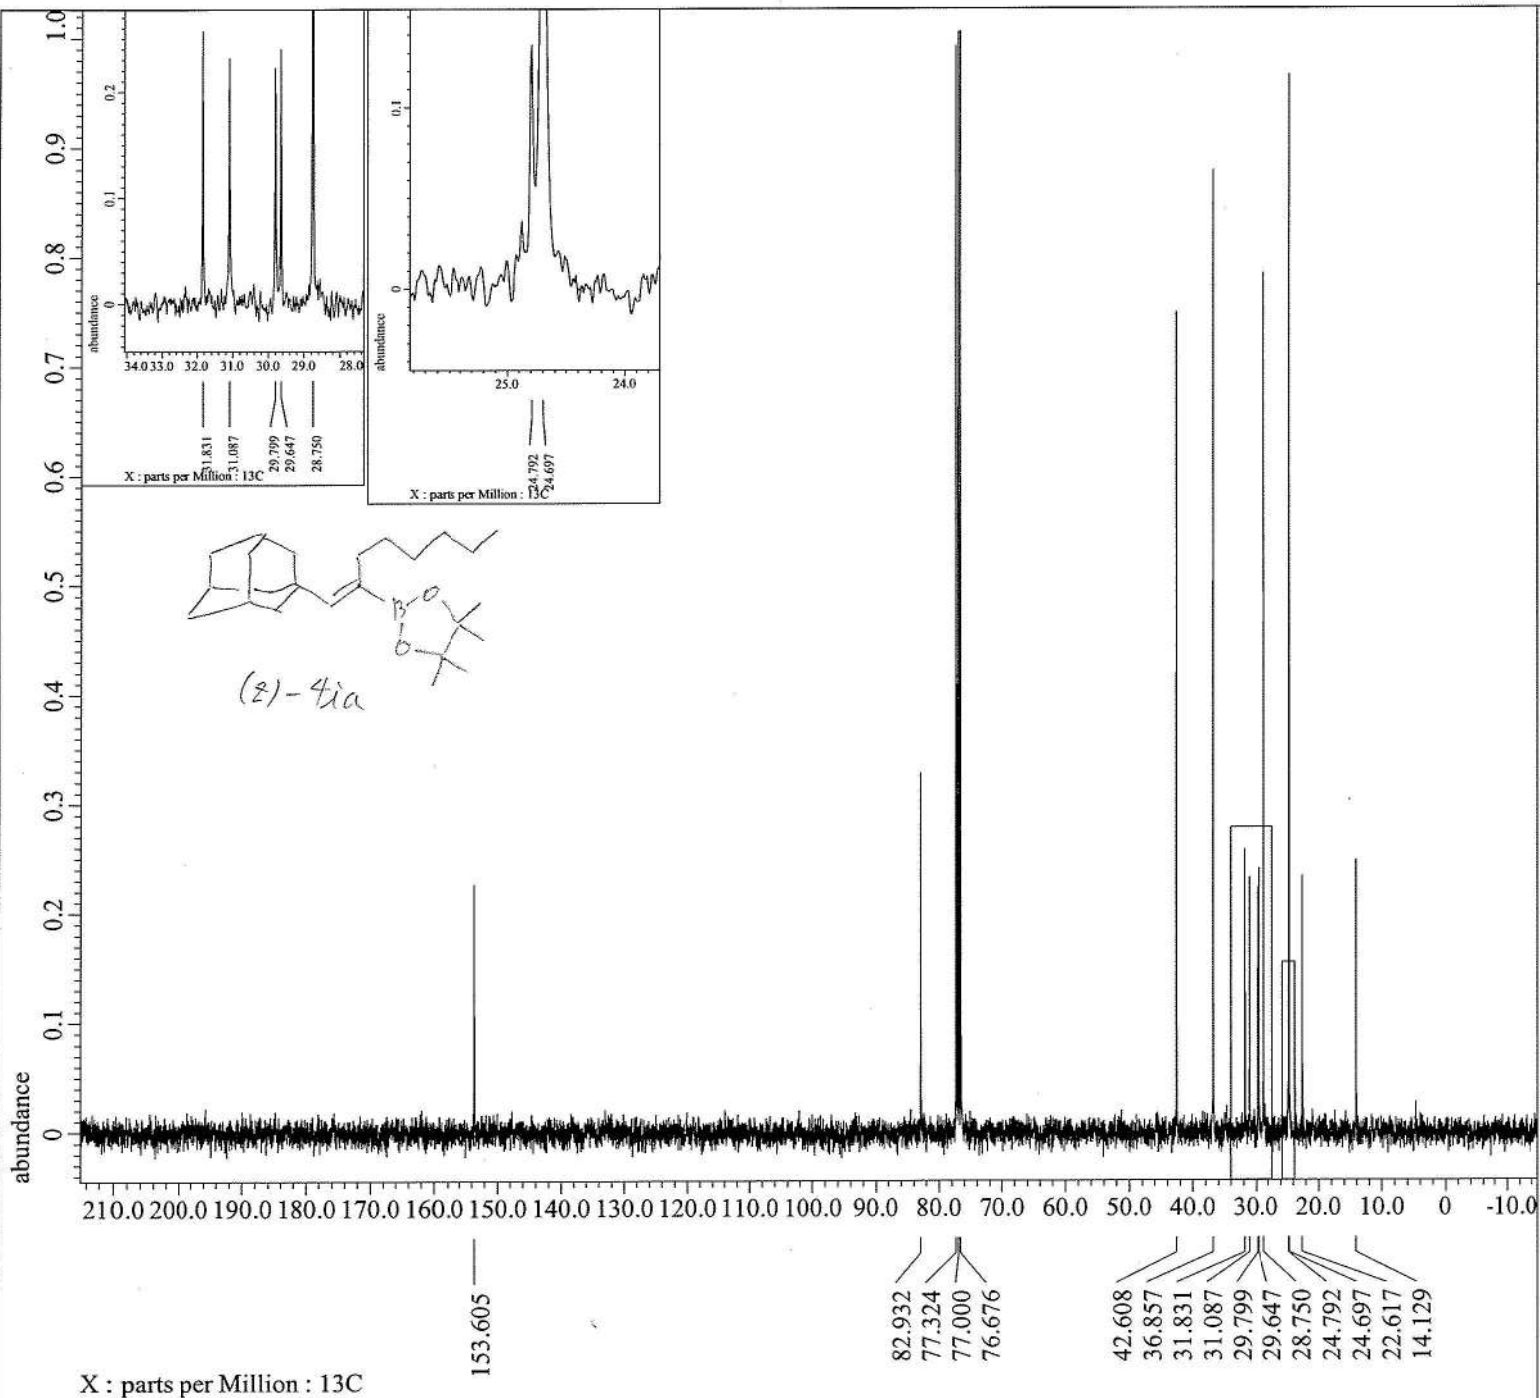

```

---- PROCESSING PARAMETERS ----
dc balance( 0, FALSE )
sexp( 2.0[Hz], 0.0[s] )
trapezoid3( 0[%], 80[%], 100[%] )
zerofill( 1 )
fft( 1, TRUE, TRUE )
machinephase
ppm

以下に由来: SRT C-B Ad 13C-2.jdf

```

```

Filename      = SRT C-B Ad 13C-4.jdf
Author       = element
Experiment   = single_pulse_dec
Sample_Id    = 1
Solvent      = CHLOROFORM-D
Actual_Start_Time = 8-JUL-2021 02:00:21
Revision_Time  = 8-SEP-2021 12:07:30

Comment      = single pulse decoupled ga
Data Format   = 1D COMPLEX
Dim_Size     = 26214
Dim_Title    = 13C
Dim_Units    = [ppm]
Dimensions   = X
Site         = ECS 400
Spectrometer = JNM-ECS400

```

```

Field Strength = 9.20197068[T] (390 [MHz])
X_Acq_Duration = 1.06430464[s]
X_Domain       = 13C
X_Freq         = 98.51479726[MHz]
X_Offset       = 100 [ppm]
X_Points       = 32768
X_Prescans     = 4
X_Resolution   = 0.93958061 [Hz]
X_Sweep        = 30.78817734 [kHz]
Irr_Domain     = 1H
Irr_Freq       = 391.78655441 [MHz]
Irr_Offset     = 5 [ppm]
Clipped        = FALSE
Scans          = 100
Total_Scans    = 100

```

```

Relaxation_Delay = 2 [s]
Recvr_Gain       = 60
Temp_Get         = 20 [dC]
X_90_Width       = 8.7 [us]
X_Acq_Time       = 1.06430464 [s]
X_Angle          = 30 [deg]
X_Atn            = 4.9 [dB]
X_Pulse          = 2.9 [us]
Irr_Atn_Dec      = 22.45 [dB]
Irr_Atn_Noise   = 22.45 [dB]
Irr_Noise        = WALTZ
Decoupling       = TRUE
Initial_Wait     = 1 [s]
Noe              = TRUE
Noe_Time         = 2 [s]
Repetition_Time  = 3.06430464 [s]

```

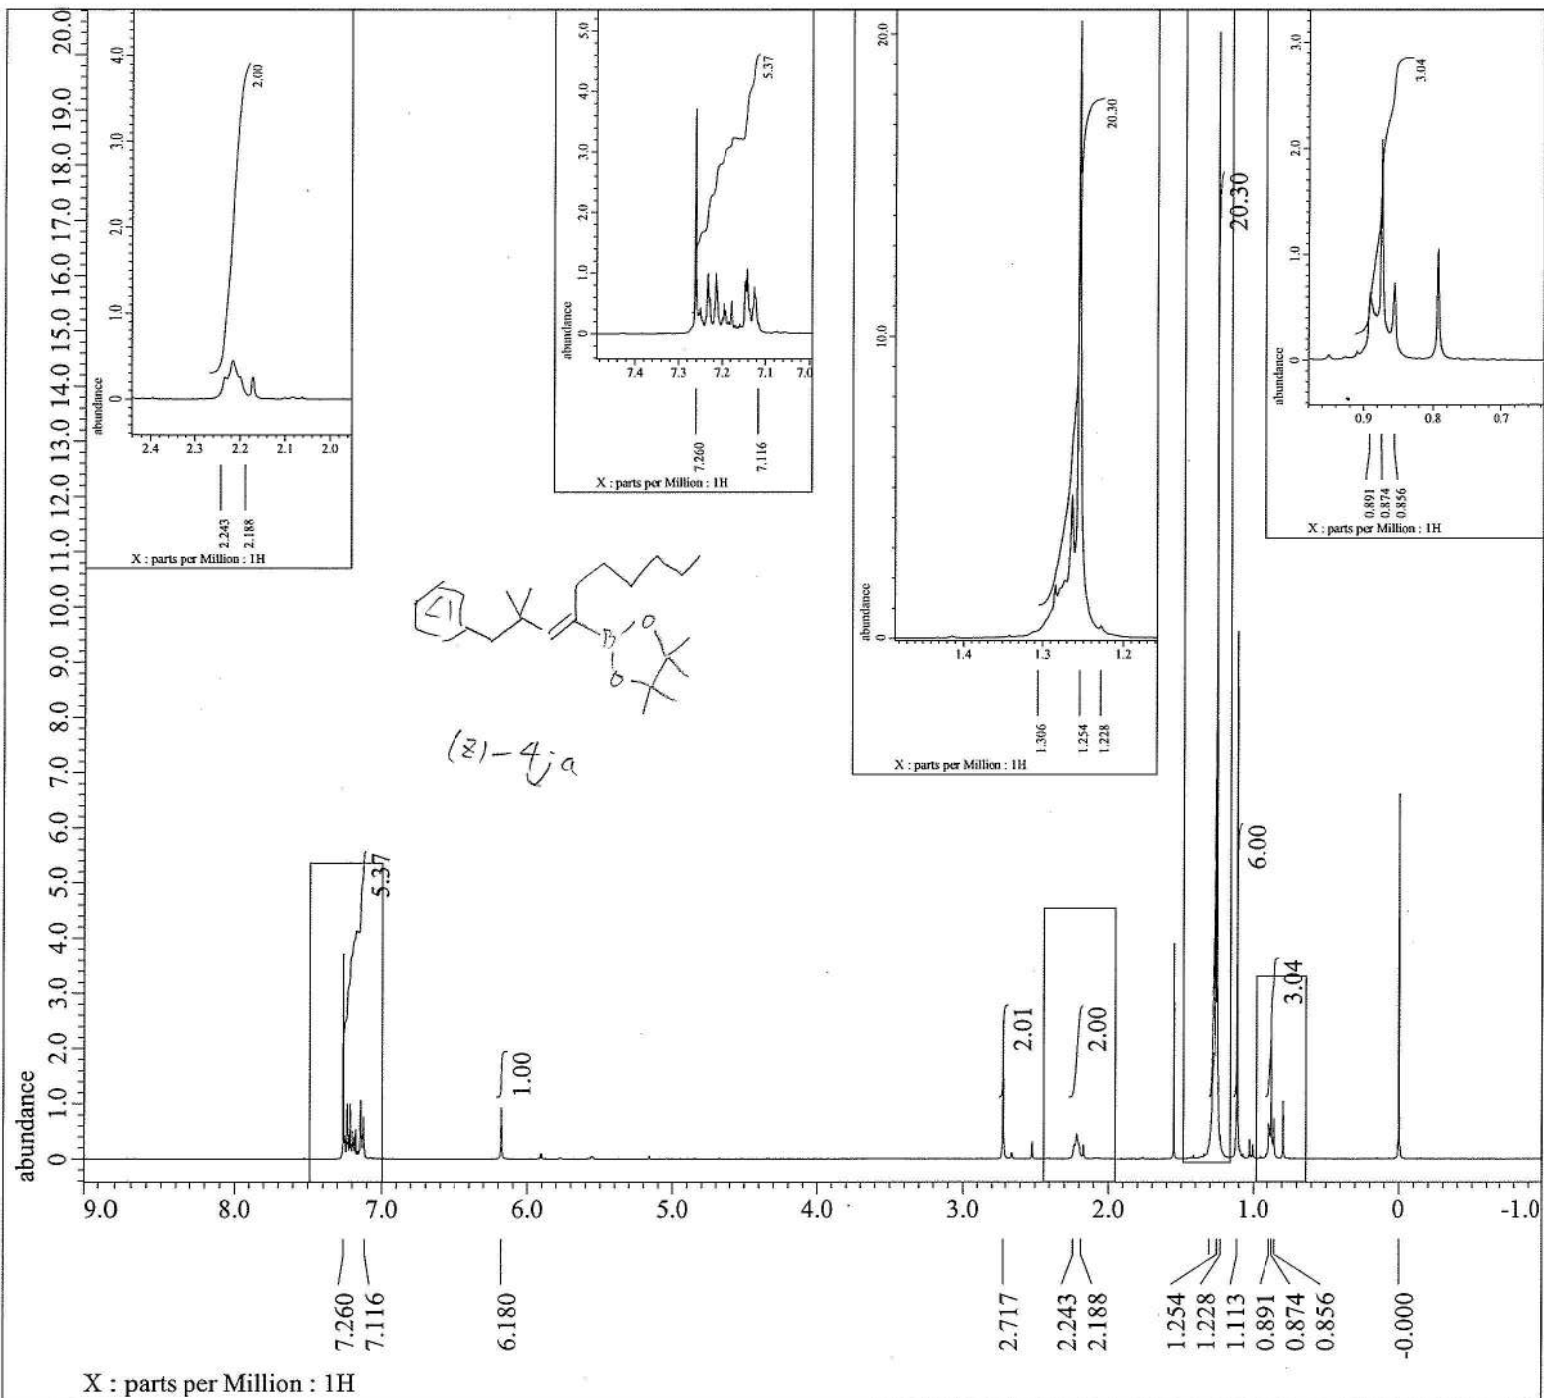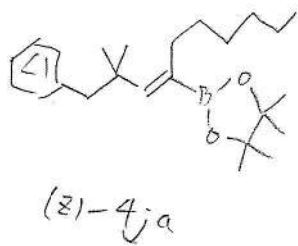

---- PROCESSING PARAMETERS ----  
 dc\_balance( 0, FALSE )  
 sexp( 0.2[Hz], 0.0[s] )  
 trapezoid3( 0[%], 80[%], 100[%] )  
 zerofill( 1 )  
 fft( 1, TRUE, TRUE )  
 machinephase  
 ppm  
 以下に由来: SRT BnMeMe C-B 2-2. jdf

Filename = SRT BnMeMe C-B 2-4. jdf  
 Author = element  
 Experiment = single\_pulse.ex2  
 Sample\_Id = S#713122  
 Solvent = CHLOROFORM-D  
 Actual\_Start\_Time = 9-JUL-2021 02:47:57  
 Revision\_Time = 8-SEP-2021 12:01:34

Comment = single\_pulse  
 Data\_Format = 1D COMPLEX  
 Dim\_Size = 13107  
 Dim\_Title = 1H  
 Dim\_Units = [ppm]  
 Dimensions = X  
 Site = ECS 400  
 Spectrometer = JNM-ECS400

Field\_Strength = 9.20197068[T] (390[MHz])  
 X\_Acq\_Duration = 2.228224[s]  
 X\_Domain = 1H  
 X\_Freq = 391.78655441[MHz]  
 X\_Offset = 5[ppm]  
 X\_Points = 16384  
 X\_Prescans = 1  
 X\_Resolution = 0.44878791[Hz]  
 X\_Sweep = 7.35294118[kHz]  
 Irr\_Domain = 1H  
 Irr\_Freq = 391.78655441[MHz]  
 Irr\_Offset = 5[ppm]  
 Tri\_Domain = 1H  
 Tri\_Freq = 391.78655441[MHz]  
 Tri\_Offset = 5[ppm]  
 Clipped = FALSE  
 Scans = 8  
 Total\_Scans = 8

Relaxation\_Delay = 5[s]  
 Recvr\_Gain = 50  
 Temp\_Get = 20[dC]  
 X\_90\_Width = 10.8[us]  
 X\_Acq\_Time = 2.228224[s]  
 X\_Angle = 45[deg]  
 X\_Atn = 1.9[dB]  
 X\_Pulse = 5.4[us]  
 Irr\_Mode = Off  
 Tri\_Mode = Off  
 Dante\_Presat = FALSE  
 Initial\_Wait = 1[s]  
 Repetition\_Time = 7.228224[s]

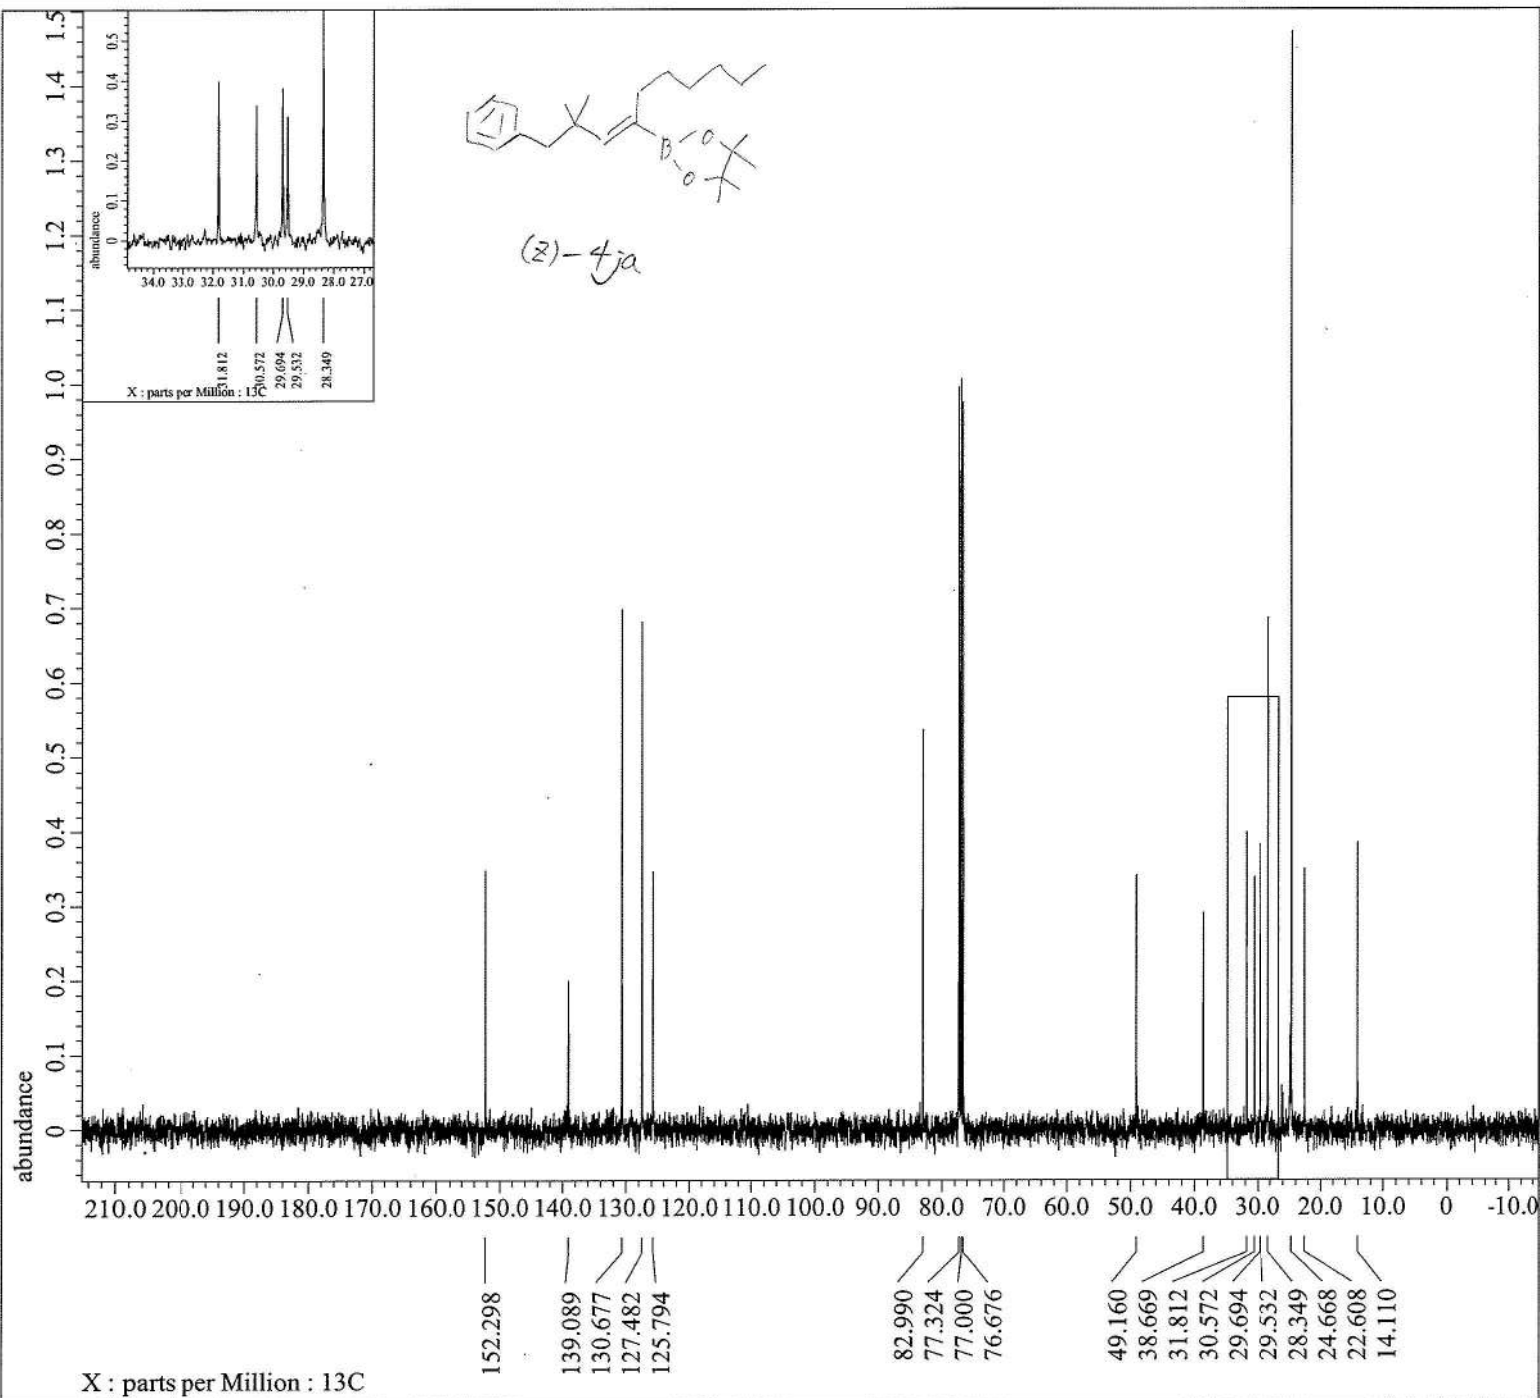

```

---- PROCESSING PARAMETERS ----
dc_balance( 0, FALSE )
sexp( 2.0[Hz], 0.0[s] )
trapezoid3( 0[%], 80[%], 100[%] )
zerofill( 1 )
fft( 1, TRUE, TRUE )
machinephase
ppm

以下に由来: SRT BnMeMe C-B data 13C-2.jdf

```

```

Filename      = SRT BnMeMe C-B data 13C-4
Author       = element
Experiment    = single_pulse_dec
Sample_Id    = 1
Solvent      = CHLOROFORM-D
Actual_Start_Time = 26-AUG-2021 01:34:55
Revision_Time = 27-AUG-2021 15:46:41

```

```

Comment      = single pulse decoupled ga
Data_Format  = 1D COMPLEX
Dim_Size     = 26214
Dim_Title    = 13C
Dim_Units    = [ppm]
Dimensions   = X
Site         = ECS 400
Spectrometer = JNM-ECS400

```

```

Field_Strength = 9.20197068[T] (390[MHz])
X_Acq_Duration = 1.06430464[s]
X_Domain       = 13C
X_Freq         = 98.51479726[MHz]
X_Offset       = 100[ppm]
X_Points       = 32768
X_Prescans     = 4
X_Resolution   = 0.93958061[Hz]
X_Sweep        = 30.78817734[kHz]
Irr_Domain     = 1H
Irr_Freq       = 391.78655441[MHz]
Irr_Offset     = 5[ppm]
Clipped       = FALSE
Scans          = 38
Total_Scans    = 38

```

```

Relaxation_Delay = 2[s]
Recvr_Gain       = 60
Temp_Get         = 21.7[dC]
X_90_Width       = 8.7[us]
X_Acq_Time       = 1.06430464[s]
X_Angle          = 30[deg]
X_Atn            = 4.9[dB]
X_Pulse          = 2.9[us]
Irr_Atn_Dec      = 22.45[dB]
Irr_Atn_Noise   = 22.45[dB]
Irr_Noise        = WALTZ
Decoupling       = TRUE
Initial_Wait     = 1[s]
Noe              = TRUE
Noe_Time         = 2[s]
Repetition_Time = 3.06430464[s]

```

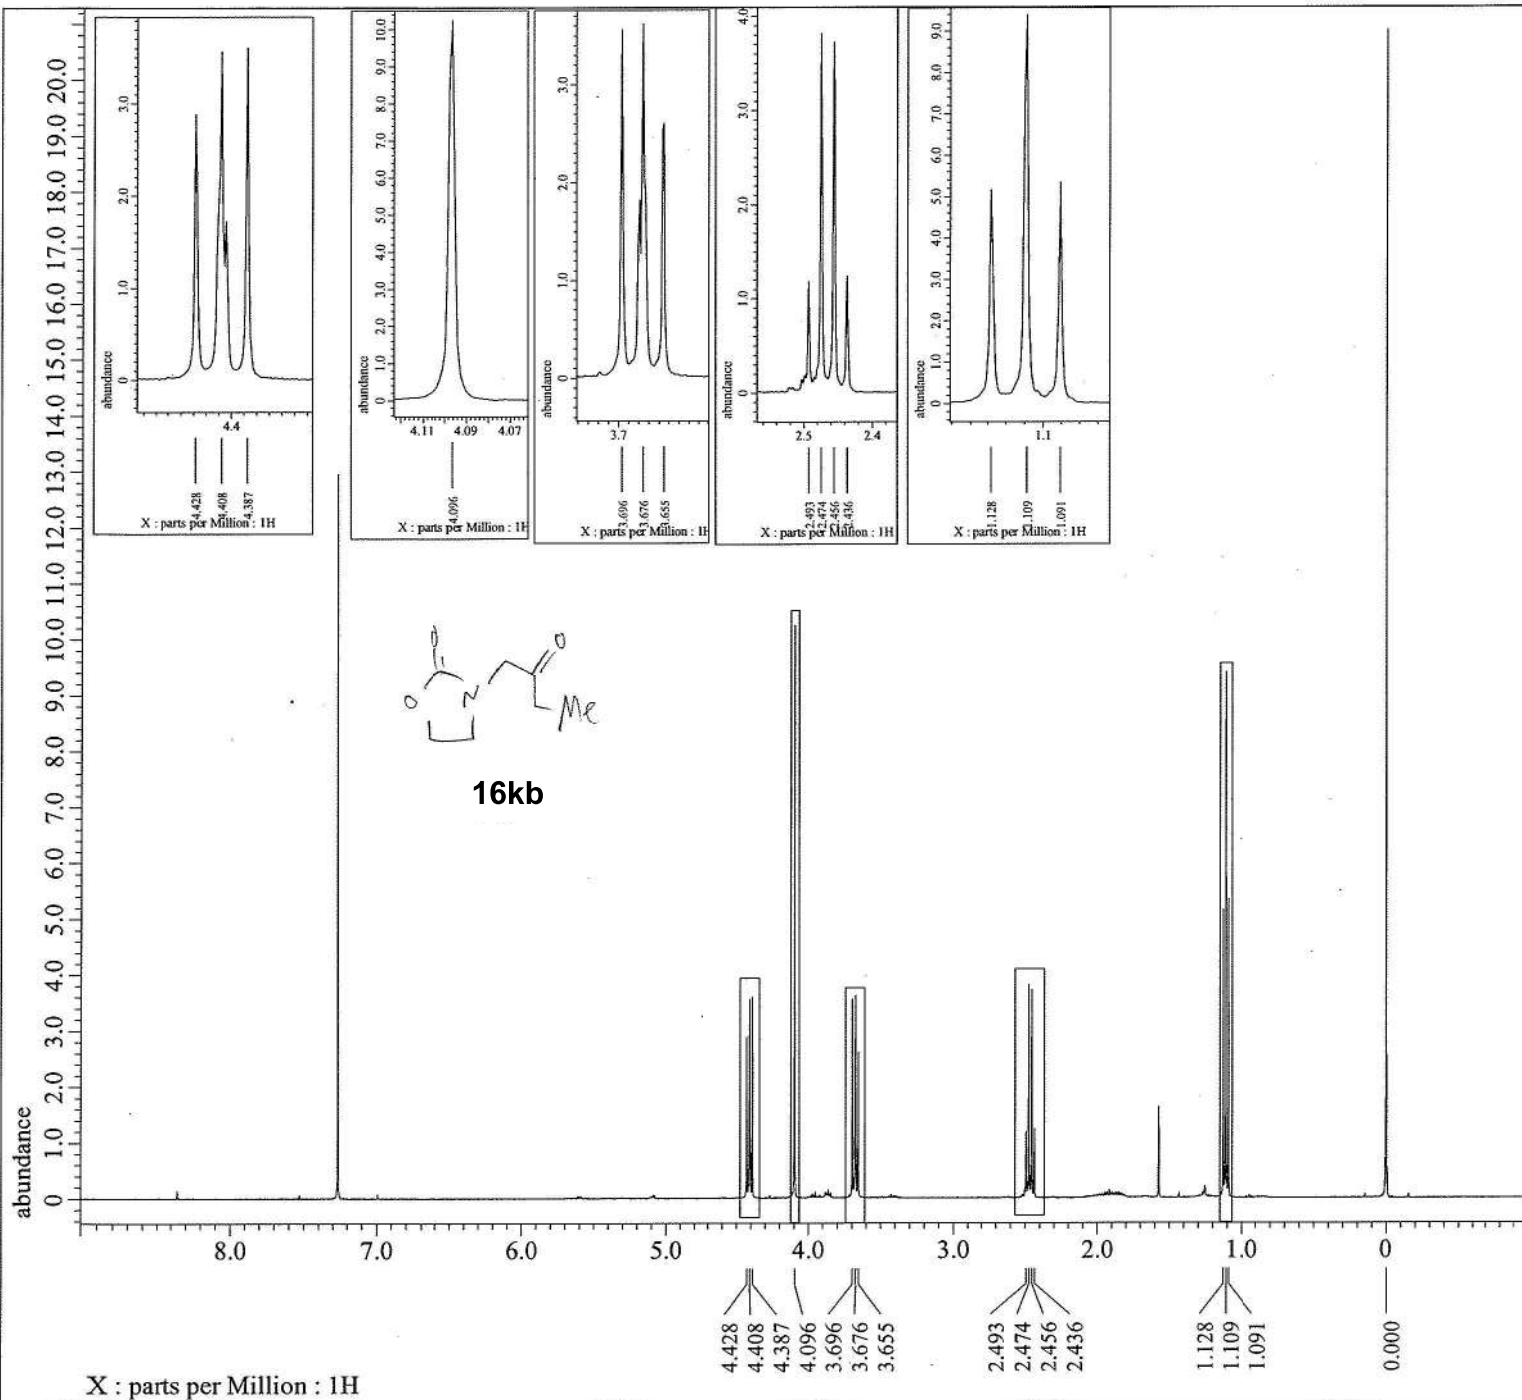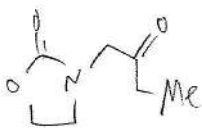

16kb

```

---- PROCESSING PARAMETERS ----
dc_balance( 0, FALSE )
sexp( 0.2[Hz], 0.0[s] )
trapezoid3( 0[%], 80[%], 100[%] )
zerofill( 1 )
fft( 1, TRUE, TRUE )
machinephase
ppm

以下に由来: KRY-256-2 pure-1.jdf

Filename      = KRY-256-2 pure-2.jdf
Author       = element
Experiment   = single_pulse.ex2
Sample_Id    = S#463589
Solvent      = CHLOROFORM-D
Actual_Start Time = 9-FEB-2022 19:41:46
Revision_Time = 1-MAR-2022 19:25:36

Comment      = single_pulse
Data_Format  = 1D COMPLEX
Dim_Size     = 13107
X_Domain     = 1H
Dim_Title    = 1H
Dim_Units    = [ppm]
Dimensions   = X
Site         = ECS 400
Spectrometer = JNM-ECS400

Field_Strength = 9.20197068[T] (390 [MHz])
X_Acq_Duration = 2.228224[s]
X_Domain       = 1H
X_Freq        = 391.78655441 [MHz]
X_Offset      = 5 [ppm]
X_Points      = 16384
X_Prescans    = 1
X_Resolution  = 0.44878791 [Hz]
X_Sweep       = 7.35294118 [kHz]
Irr_Domain    = 1H
Irr_Freq     = 391.78655441 [MHz]
Irr_Offset    = 5 [ppm]
Tri_Domain    = 1H
Tri_Freq     = 391.78655441 [MHz]
Tri_Offset    = 5 [ppm]
Clipped      = FALSE
Scans        = 8
Total_Scans  = 8

Relaxation_Delay = 5 [s]
Recvr_Gain       = 56
Temp_Get        = 16.6 [dC]
X_90_Width     = 10.8 [us]
X_Acq_Time     = 2.228224 [s]
X_Angle        = 45 [deg]
X_Atn         = 1.9 [dB]
X_Pulse       = 5.4 [us]
Irr_Mode      = Off
Tri_Mode      = Off
Dante_Presat  = FALSE
Initial_Wait  = 1 [s]
Repetition_Time = 7.228224 [s]

```

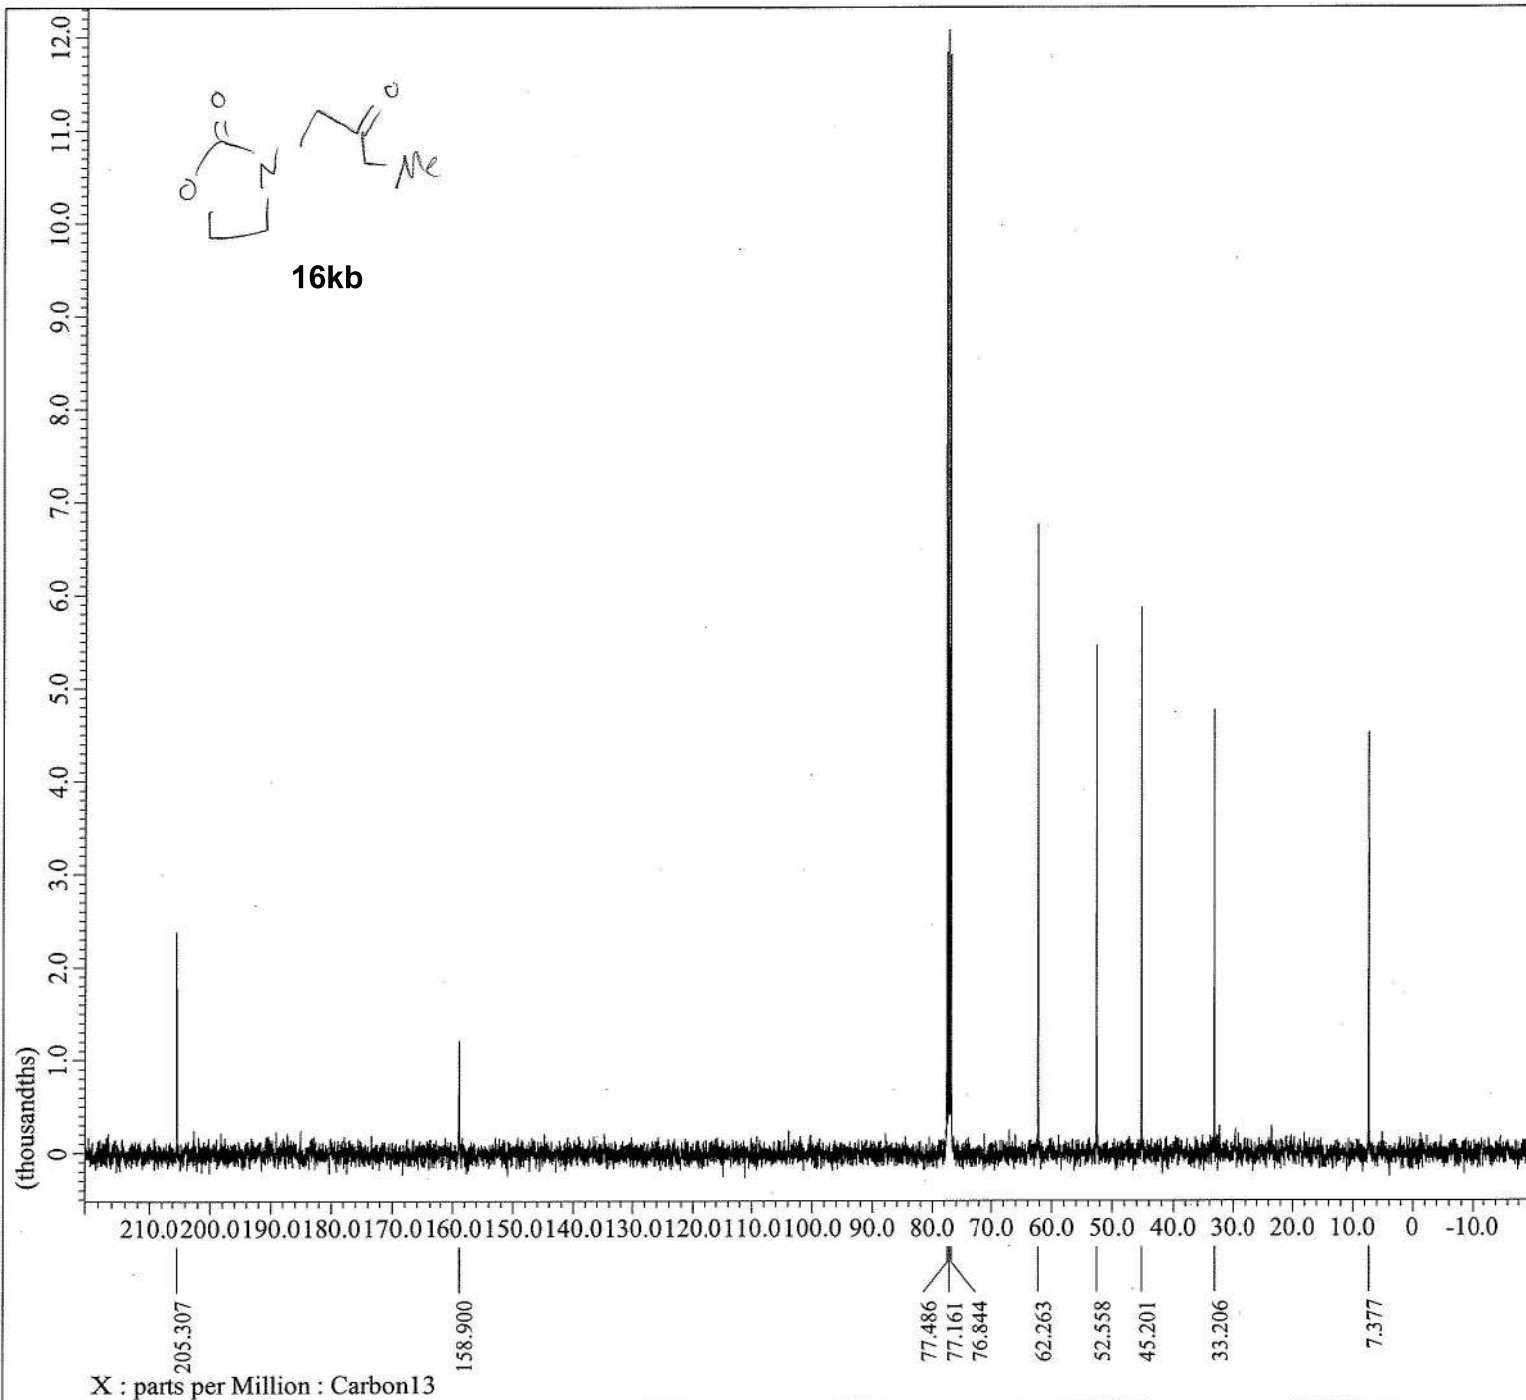

```

---- PROCESSING PARAMETERS ----
sexp( 2.0[Hz], 0.0[s] )
trapezoid( 0[%], 0[%], 80[%], 100[%] )
zerofill( 1 )
fft( 1, TRUE, TRUE )
machinephase
ppm

以下に由来: KRY-256 pure_Carbon-1-1.jdf

```

```

Filename           = KRY-256 pure_Carbo
Author             = element
Experiment         = carbon_auto.jxp
Sample_Id         = KRY-256 pure
Solvent           = CHLOROFORM-D
Actual_Start_Time = 14-FEB-2022 10:33:
Revision_Time     = 1-MAR-2022 19:29:

Comment           = single pulse decou
Data_Format      = 1D COMPLEX
Dim_Size         = 26214
X_Domain         = Carbon13
Dim_Title        = Carbon13
Dim_Units        = [ppm]
Dimensions       = X
Spectrometer     = DELTA2_NMR

Field_Strength   = 9.2982153[T] (400[
X_Acq_Duration   = 1.048576[s]
X_Domain         = Carbon13
X_Freq           = 99.54517646 [MHz]
X_Offset         = 100 [ppm]
X_Points         = 32768
X_Prescans       = 4
X_Resolution     = 0.95367432 [Hz]
X_Sweep         = 31.25 [kHz]
X_Sweep_Clipped = 25 [kHz]
Irr_Domain       = Proton
Irr_Freq         = 395.88430144 [MHz]
Irr_Offset       = 5 [ppm]
Blanking         = 5 [us]
Clipped          = TRUE
Scans            = 200
Total_Scans      = 200

Relaxation_Delay = 2 [s]
Recvr_Gain       = 50
Temp_Get         = 16 [dC]
X_90_Width      = 9.65 [us]
X_Acq_Time       = 1.048576 [s]
X_Angle         = 30 [deg]
X_Atn           = 8 [dB]
X_Pulse         = 3.21666667 [us]
Irr_Atn_Dec     = 25.059 [dB]
Irr_Atn_Dec_Calc = 25.059 [dB]
Irr_Atn_Dec_Default_Calc = 25.059 [dB]
Irr_Atn_Noise   = 25.059 [dB]
Irr_Dec_Bandwidth_Hz = 4.7826087 [kHz]
Irr_Dec_Bandwidth_Ppm = 12.08082432 [ppm]
Irr_Dec_Freq    = 395.88430144 [MHz]
Irr_Dec_Merit_Factor = 2.2
Irr_Decoupling  = TRUE
Irr_Noise       = TRUE
Irr_Noise       = WALTZ
Irr_Offset_Default = 5 [ppm]

```



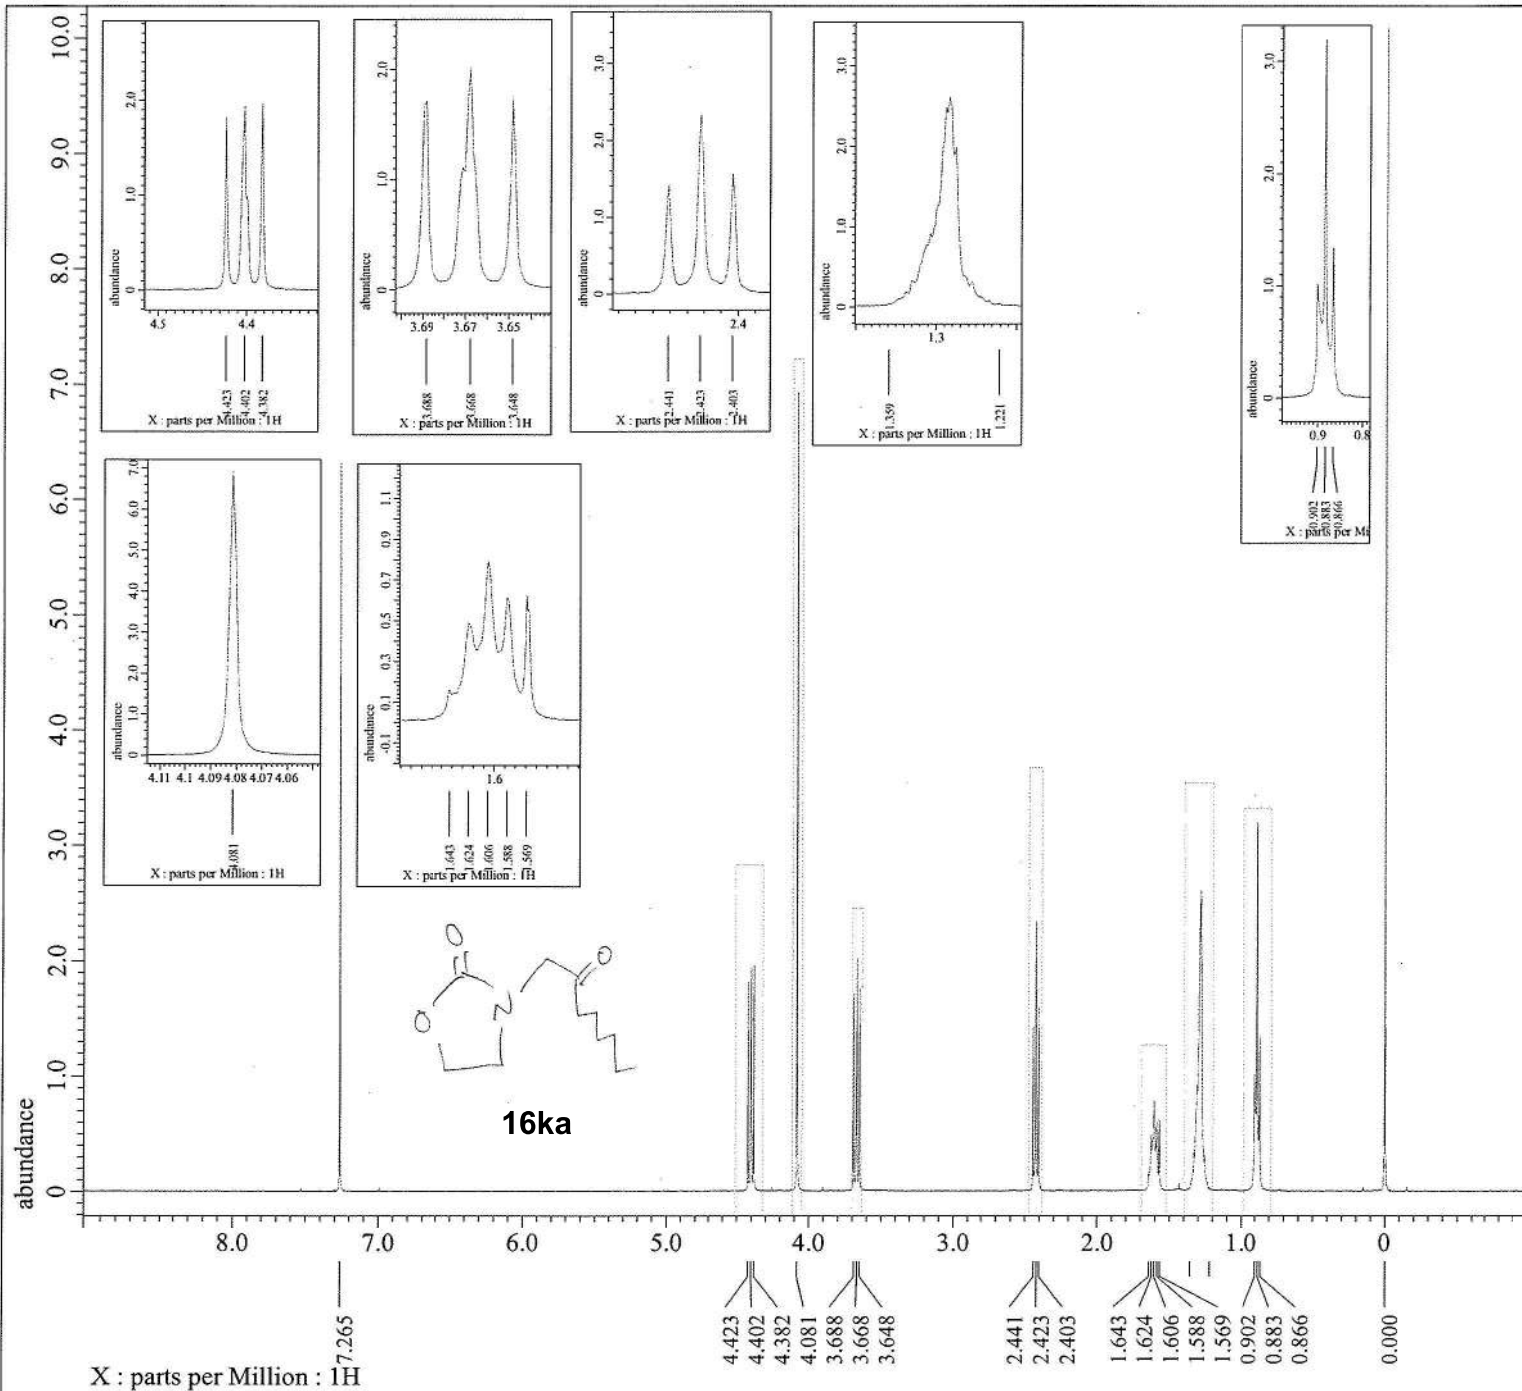

```

---- PROCESSING PARAMETERS ----
dc_balance( 0, FALSE )
sexp( 0.2[Hz], 0.0[s] )
trapezoid3( 0[%], 80[%], 100[%] )
zerofill( 1 )
fft( 1, TRUE, TRUE )
machinephase
ppm

以下に由来: KRY-104 pure-1.jdf

Filename      = KRY-104 pure-2.jdf
Author       = element
Experiment   = single_pulse.ex2
Sample_Id    = S#338441
Solvent      = CHLOROFORM-D
Actual_Start_Time = 26-FEB-2021 16:19:36
Revision_Time  = 2-AUG-2021 18:43:45

Comment      = single_pulse
Data_Format   = 1D COMPLEX
Dim_Size     = 13107
X_Domain     = 1H
Dim_Title    = 1H
Dim_Units    = [ppm]
Dimensions   = X
Site         = ECS 400
Spectrometer = JNM-ECS400

Field_Strength = 9.20197068[T] (390 [MHz])
X_Acq_Duration = 2.228224[s]
X_Domain       = 1H
X_Freq         = 391.78655441 [MHz]
X_Offset       = 5 [ppm]
X_Points       = 16384
X_Prescans     = 1
X_Resolution  = 0.44878791 [Hz]
X_Sweep        = 7.35294118 [kHz]
Irr_Domain     = 1H
Irr_Freq       = 391.78655441 [MHz]
Irr_Offset     = 5 [ppm]
Tri_Domain     = 1H
Tri_Freq       = 391.78655441 [MHz]
Tri_Offset     = 5 [ppm]
Clipped        = FALSE
Scans          = 8
Total_Scans    = 8

Relaxation_Delay = 5 [s]
Recvr_Gain       = 52
Temp_Get         = 17.6 [dC]
X_90_Width      = 10.8 [us]
X_Acq_Time      = 2.228224 [s]
X_Angle         = 45 [deg]
X_Atn           = 1.9 [dB]
X_Pulse         = 5.4 [us]
Irr_Mode        = Off
Tri_Mode        = Off
Dante_Preset    = FALSE
Initial_Wait    = 1 [s]
Repetition_Time = 7.228224 [s]

```

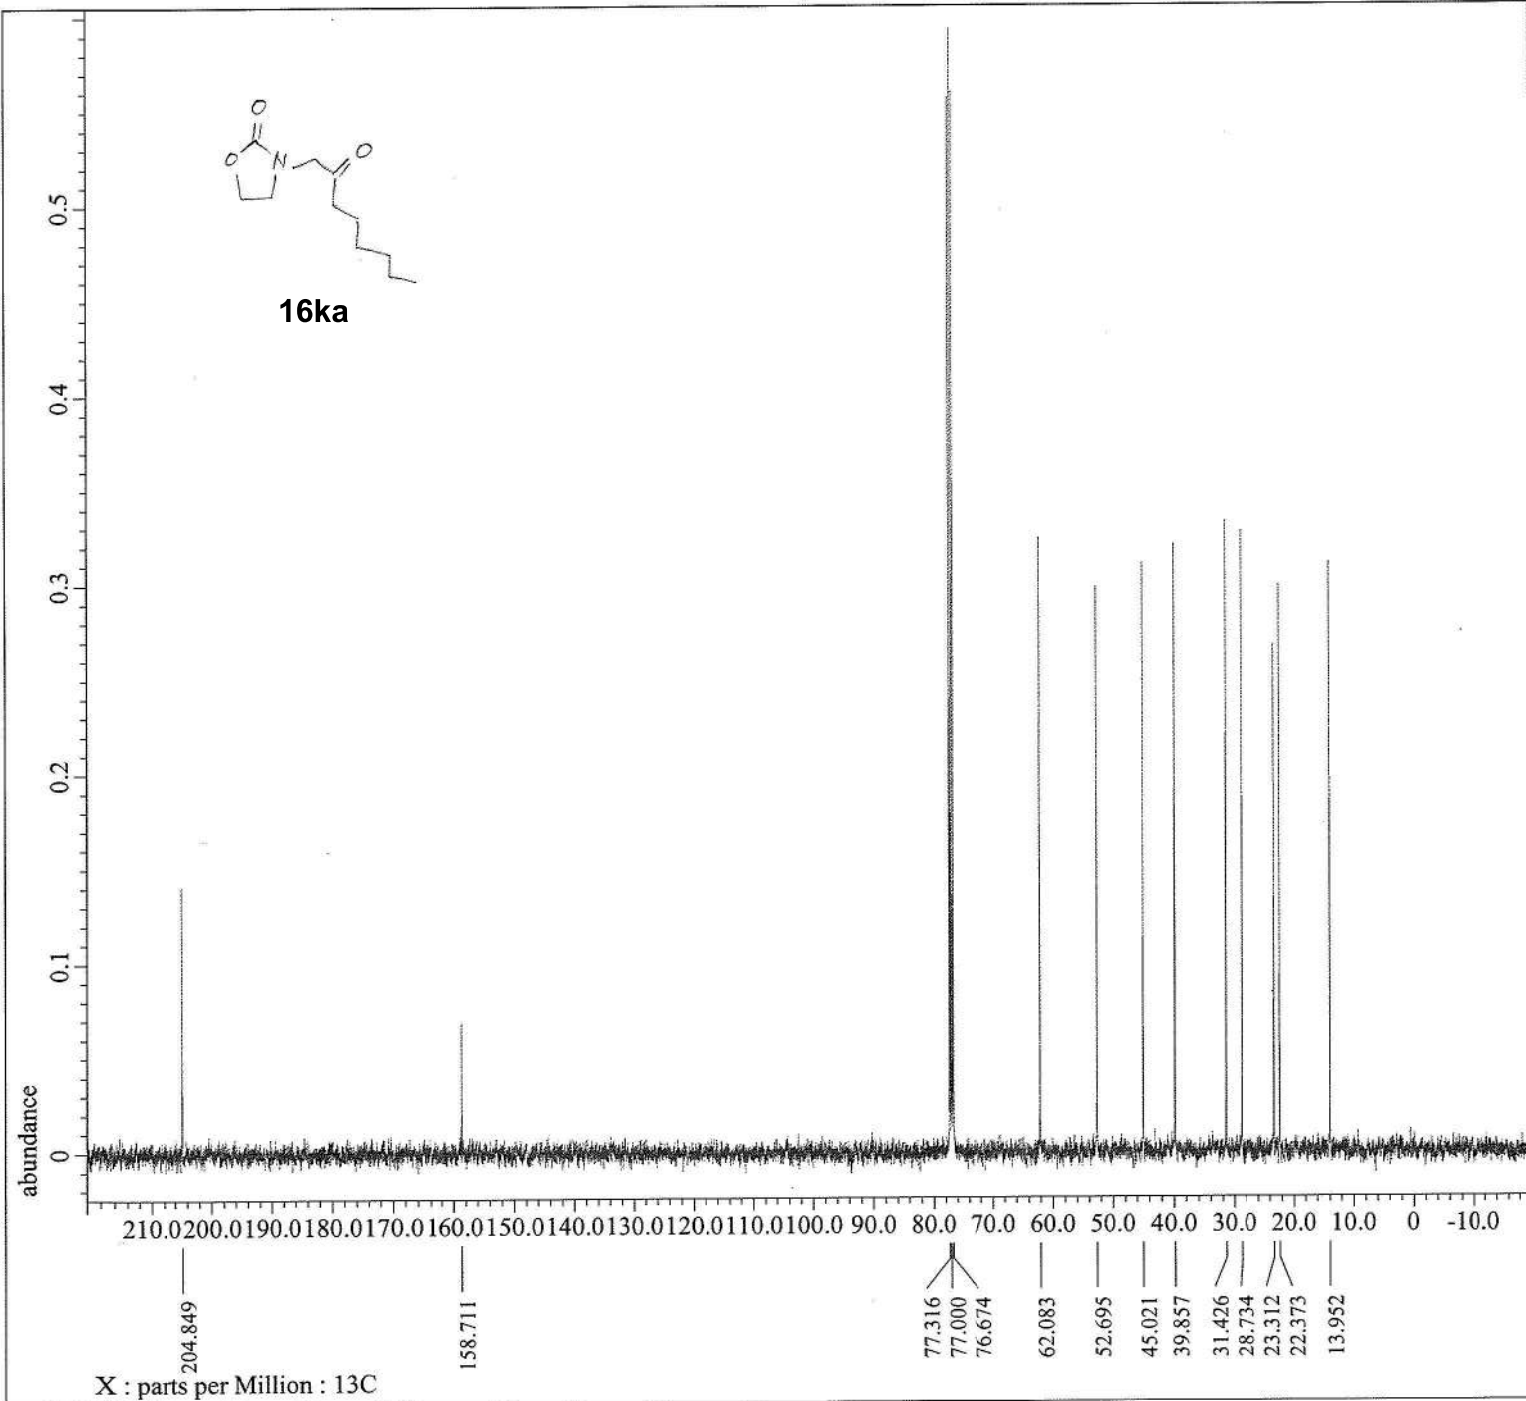

```

---- PROCESSING PARAMETERS ----
dc_balance( 0, FALSE )
sexp( 2.0[Hz], 0.0[s] )
trapezoid3( 0[%], 80[%], 100[%] )
zerofill( 1 )
fft( 1, TRUE, TRUE )
machinephase
ppm

以下に由来: KRY-104 C-1.jdf

Filename      = KRY-104 C-2.jdf
Author       = element
Experiment   = single_pulse_dec
Sample Id    = S#358229
Solvent      = CHLOROFORM-D
Actual_Start_Time = 26-FEB-2021 18:04:47
Revision_Time  = 23-OCT-2021 15:30:06

Comment      = single pulse decoupled ga
Data Format   = 1D COMPLEX
Dim Size     = 26214
X_Domain     = 13C
Dim Title    = 13C
Dim Units    = [ppm]
Dimensions   = X
Site         = ECX 400P
Spectrometer = DELTA2_NMR

Field Strength = 9.2982153[T] (400[MHz])
X_Acq_Duration = 1.048576[s]
X_Domain       = 13C
X_Freq         = 99.54517646 [MHz]
X_Offset       = 100[ppm]
X_Points       = 32768
X_Prescans     = 4
X_Resolution   = 0.95367432 [Hz]
X_Sweep        = 31.25 [kHz]
Irr_Domain     = 1H
Irr_Freq       = 395.88430144 [MHz]
Irr_Offset     = 5[ppm]
Clipped        = FALSE
Scans          = 200
Total_Scans    = 200

Relaxation_Delay = 2[s]
Recvr_Gain       = 54
Temp_Get         = 20 [dC]
X_90_Width      = 9.8[us]
X_Acq_Time       = 1.048576[s]
X_Angle          = 30[deg]
X_Atn            = 3.4[dB]
X_Pulse          = 3.26666667[us]
Irr_Atn_Dec      = 22.71[dB]
Irr_Atn_Noise   = 22.71[dB]
Irr_Noise        = WALTZ
Decoupling       = TRUE
Initial_Wait     = 1[s]
Noe              = TRUE
Noe_Time         = 2[s]
Repetition_Time  = 3.048576[s]

```

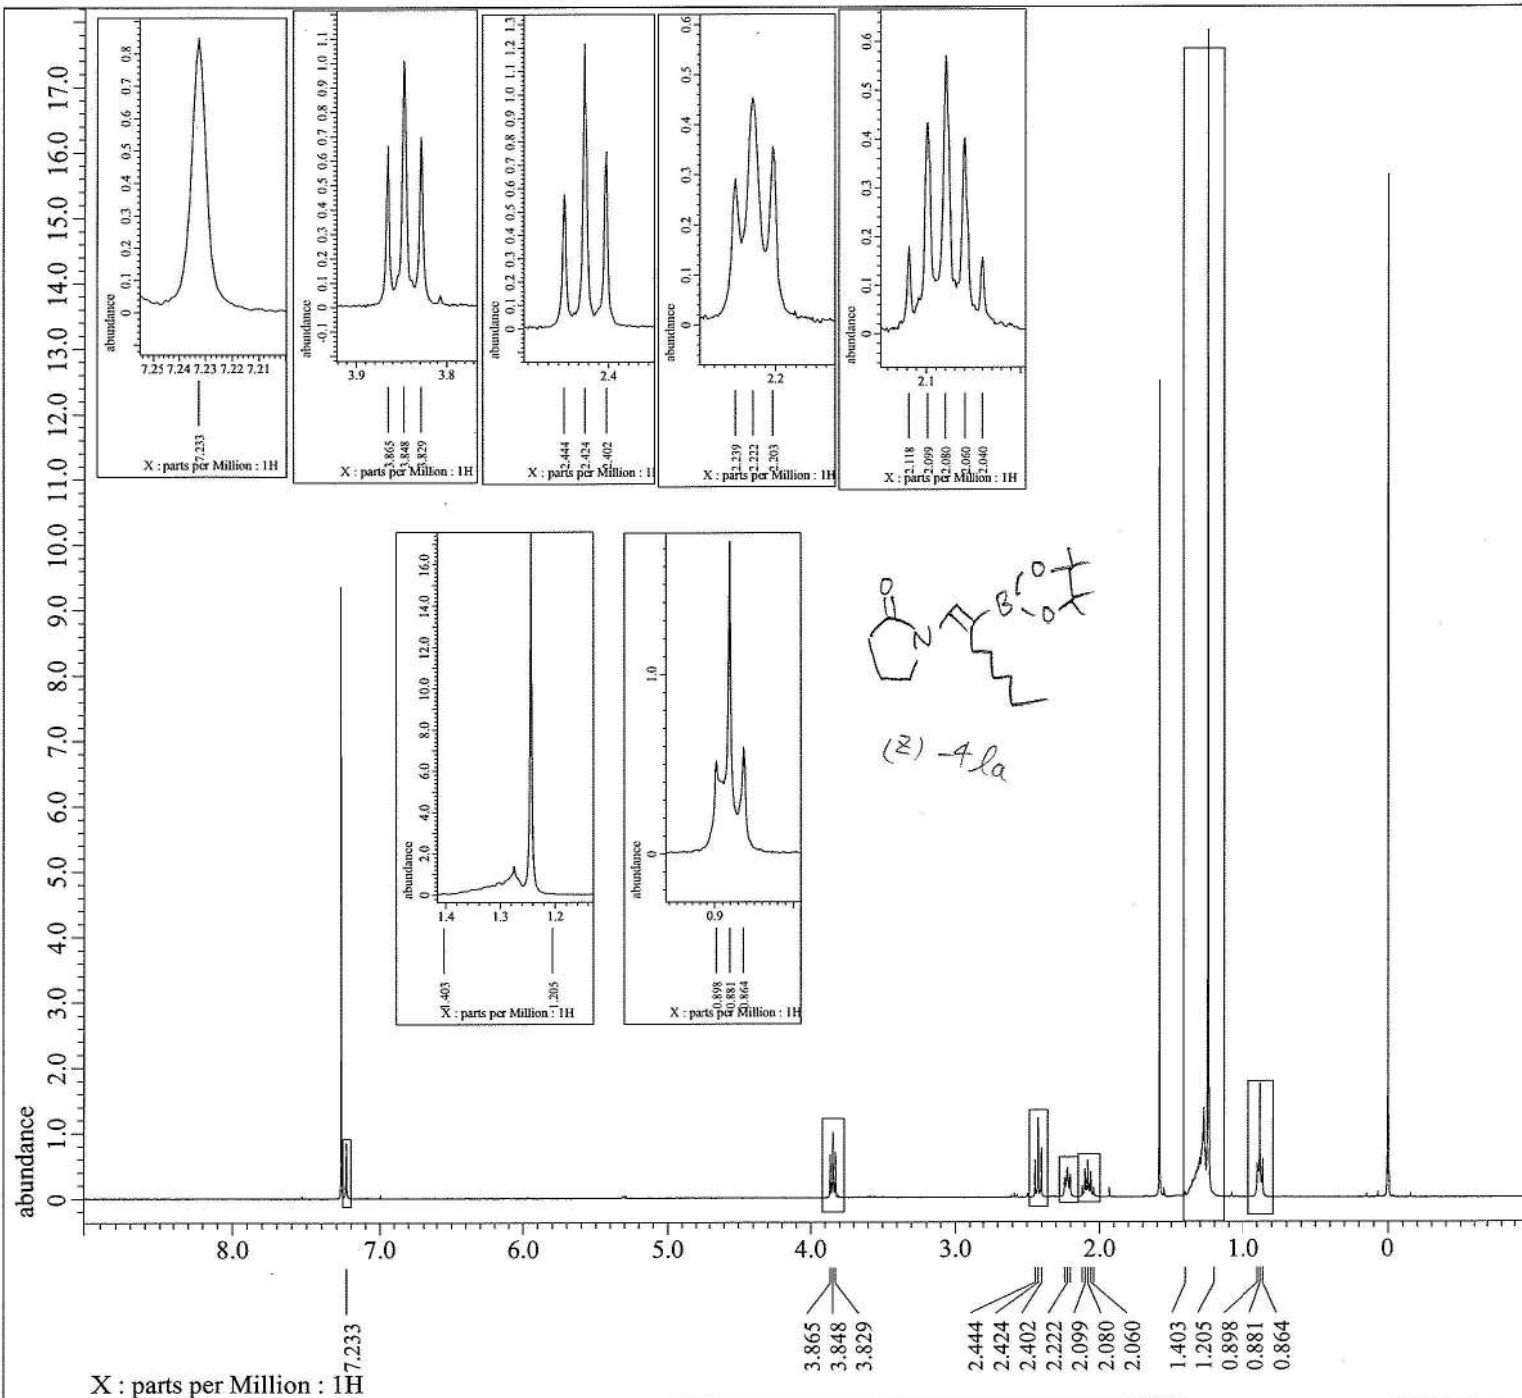

```

---- PROCESSING PARAMETERS ----
dc_balance( 0, FALSE )
sexp( 0.2[Hz], 0.0[s] )
trapezoid3( 0[%], 80[%], 100[%] )
zerofill( 1 )
fft( 1, TRUE, TRUE )
machinephase
ppm

以下に由来:: KRY-072-1 pure-1.jdf

Filename      = KRY-072-1 pure-2.jdf
Author       = element
Experiment   = single_pulse.ex2
Sample Id    = S#726186
Solvent      = CHLOROFORM-D
Actual Start Time = 18-DEC-2020 03:15:54
Revision Time   = 2-FEB-2022 17:44:54

Comment      = single_pulse
Data Format   = 1D COMPLEX
Dim Size     = 13107
X Domain     = 1H
Dim Title    = 1H
Dim Units    = [ppm]
Dimensions   = X
Site         = ECS 400
Spectrometer = JNM-ECS400

Field Strength = 9.20197068[T] (390 [MHz])
X Acq Duration = 2.228224[s]
X Domain      = 1H
X Freq       = 391.78655441 [MHz]
X Offset     = 5 [ppm]
X Points     = 16384
X Prescans   = 1
X Resolution = 0.44878791 [Hz]
X Sweep     = 7.35294118 [kHz]
Irr Domain   = 1H
Irr Freq    = 391.78655441 [MHz]
Irr Offset  = 5 [ppm]
Tri Domain   = 1H
Tri Freq    = 391.78655441 [MHz]
Tri Offset  = 5 [ppm]
Clipped     = FALSE
Scans       = 8
Total Scans = 8

Relaxation Delay = 5 [s]
Recvr Gain      = 54
Temp Get       = 14.5 [dC]
X 90 Width    = 10.8 [us]
X Acq Time    = 2.228224 [s]
X Angle      = 45 [deg]
X Atn       = 1.9 [dB]
X Pulse     = 5.4 [us]
Irr Mode    = Off
Tri Mode    = Off
Dante Presat = FALSE
Initial Wait = 1 [s]
Repetition Time = 7.228224 [s]

```

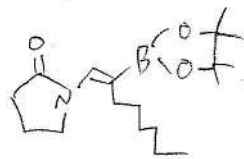

(Z)-4la

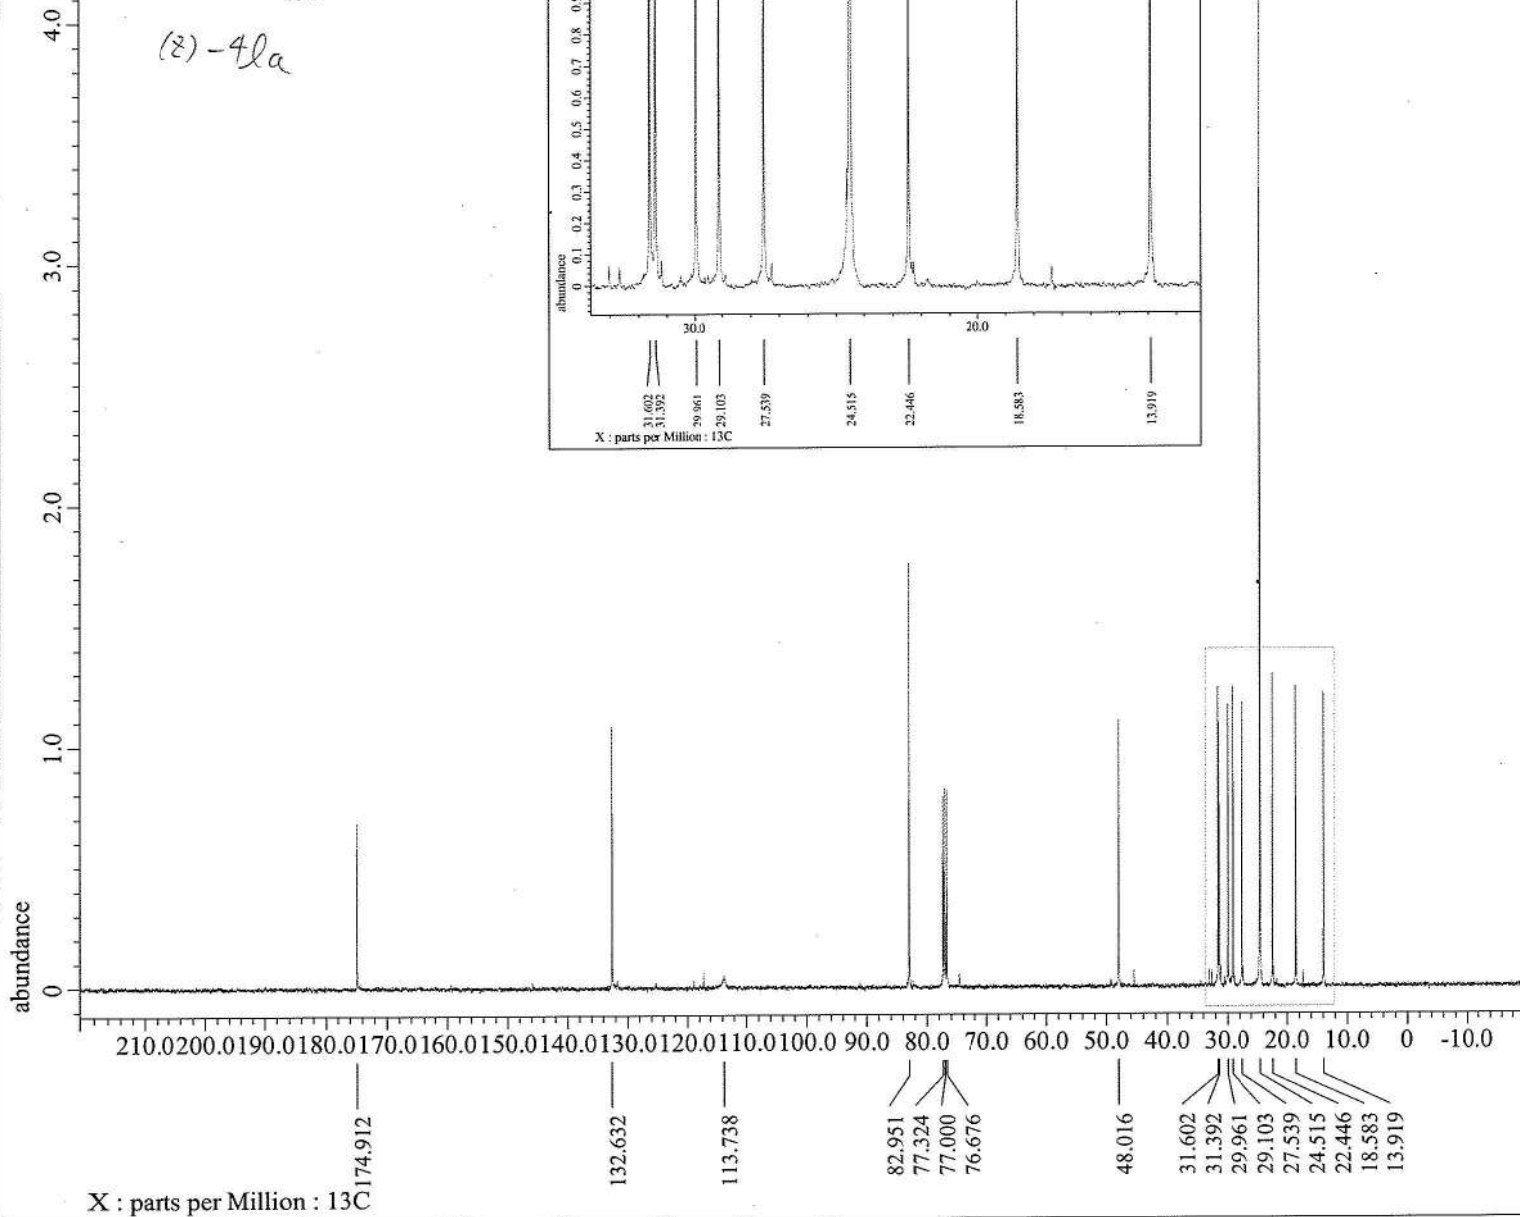

```

---- PROCESSING PARAMETERS ----
dc_balance( 0, FALSE )
sexp( 2.0[Hz], 0.0[s] )
trapezoid3( 0[%], 80[%], 100[%] )
zerofill( 1 )
fft( 1, TRUE, TRUE )
machinephase
ppm
以下に由来: KRY-072 C pure-1.jdf

```

```

Filename      = KRY-072 C pure-2.jdf
Author        = element
Experiment    = single_pulse_dec
Sample_Id     = S#497658
Solvent       = CHLOROFORM-D
Actual_Start_Time = 28-APR-2021 20:36:09
Revision_Time  = 25-OCT-2021 20:23:33

```

```

Comment       = single pulse decoupled ga
Data_Format   = 1D COMPLEX
Dim_Size      = 26214
X_Domain      = 13C
Dim_Title     = 13C
Dim_Units     = [ppm]
Dimensions    = X
Site          = ECS 400
Spectrometer  = JNM-BCS400

```

```

Field_Strength = 9.20197068[T] (390[MHz])
X_Acq_Duration = 1.06430464[s]
X_Domain       = 13C
X_Freq         = 98.51479726[MHz]
X_Offset       = 100[ppm]
X_Points       = 32768
X_Prescans     = 4
X_Resolution   = 0.93958061[Hz]
X_Sweep        = 30.78817734[kHz]
Irr_Domain     = 1H
Irr_Freq       = 391.78655441[MHz]
Irr_Offset     = 5[ppm]
Clipped        = FALSE
Scans          = 200
Total_Scans    = 200

```

```

Relaxation_Delay = 2[s]
Recvr_Gain       = 60
Temp_Get         = 19.1[dC]
X_90_Width      = 8.7[us]
X_Acq_Time       = 1.06430464[s]
X_Angle         = 30[deg]
X_Atn           = 4.9[dB]
X_Pulse         = 2.9[us]
Irr_Atn_Dec     = 22.45[dB]
Irr_Atn_No     = 22.45[dB]
Irr_Noise       = WALTZ
Decoupling      = TRUE
Initial_Wait    = 1[s]
Noe              = TRUE
Noe_Time        = 2[s]
Repetition_Time = 3.06430464[s]

```

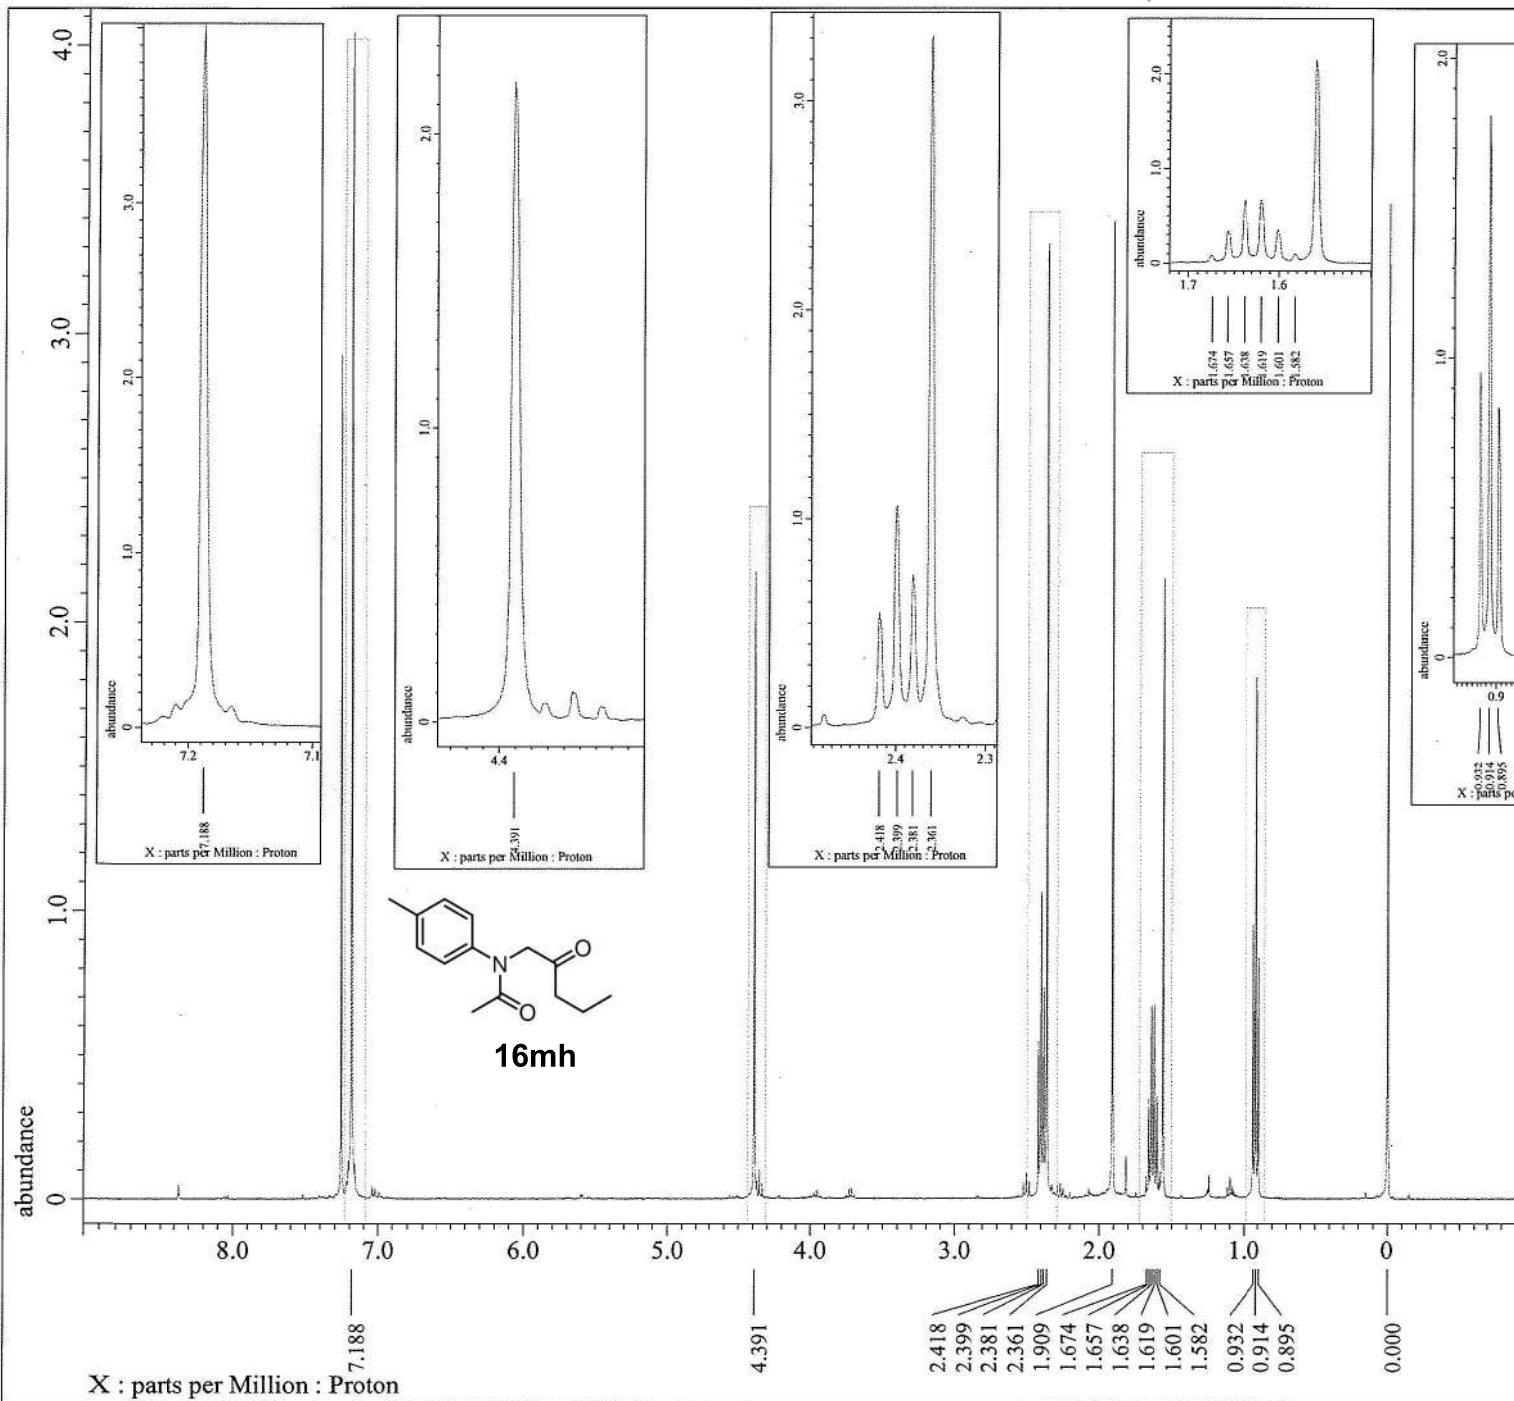

```

---- PROCESSING PARAMETERS ----
dc_balance( 0, FALSE )
sexp( 0.2[Hz], 0.0[s] )
trapezoid( 0[%], 0[%], 80[%], 100[%] )
zerofill( 1 )
fft( 1, TRUE, TRUE )
machinephase
ppm
以下に由来: KRY-142(2) pure_Proton-1-1.jdf

```

```

Filename      = KRY-142(2) pure_Proton-1-
Author       = element
Experiment    = proton.jxp
Sample_Id    = KRY-142(2) pure
Solvent      = CHLOROFORM-D
Actual_Start_Time = 29-JUN-2021 11:39:33
Revision_Time = 30-OCT-2021 10:10:44

Comment      = single_pulse
Data_Format  = 1D_COMPLEX
Dim_Size     = 13107
X_Domain     = Proton
Dim_Title    = Proton
Dim_Units    = [ppm]
Dimensions   = X
Site         = JNM-ECS400
Spectrometer = DELTA2_NMR

```

```

Field Strength = 9.37221[T] (400[MHz])
X_Acq_Duration = 2.1889024[s]
X_Domain       = 1H
X_Freq         = 399.03472754[MHz]
X_Offset       = 5.0[ppm]
X_Points       = 16384
X_Prescans     = 1
X_Resolution   = 0.45684997[Hz]
X_Sweep        = 7.48502994[kHz]
X_Sweep_Clipped = 5.98802395[kHz]
Irr_Domain     = Proton
Irr_Freq       = 399.03472754[MHz]
Irr_Offset     = 5.0[ppm]
Tri_Domain     = Proton
Tri_Freq       = 399.03472754[MHz]
Tri_Offset     = 5.0[ppm]
Clipped        = FALSE
Scans          = 8
Total_Scans    = 8

```

```

Relaxation_Delay = 5[s]
Recvr_Gain       = 46
Temp_Get         = 23.1[dC]
X_90_Width       = 6.6[us]
X_Acq_Time       = 2.1889024[s]
X_Angle          = 45[deg]
X_Atn            = 1[dB]
X_Pulse          = 3.3[us]
Irr_Mode         = Off
Tri_Mode         = Off
Dante_Presat     = FALSE
Initial_Wait     = 1[s]
Repetition_Time  = 7.1889024[s]

```

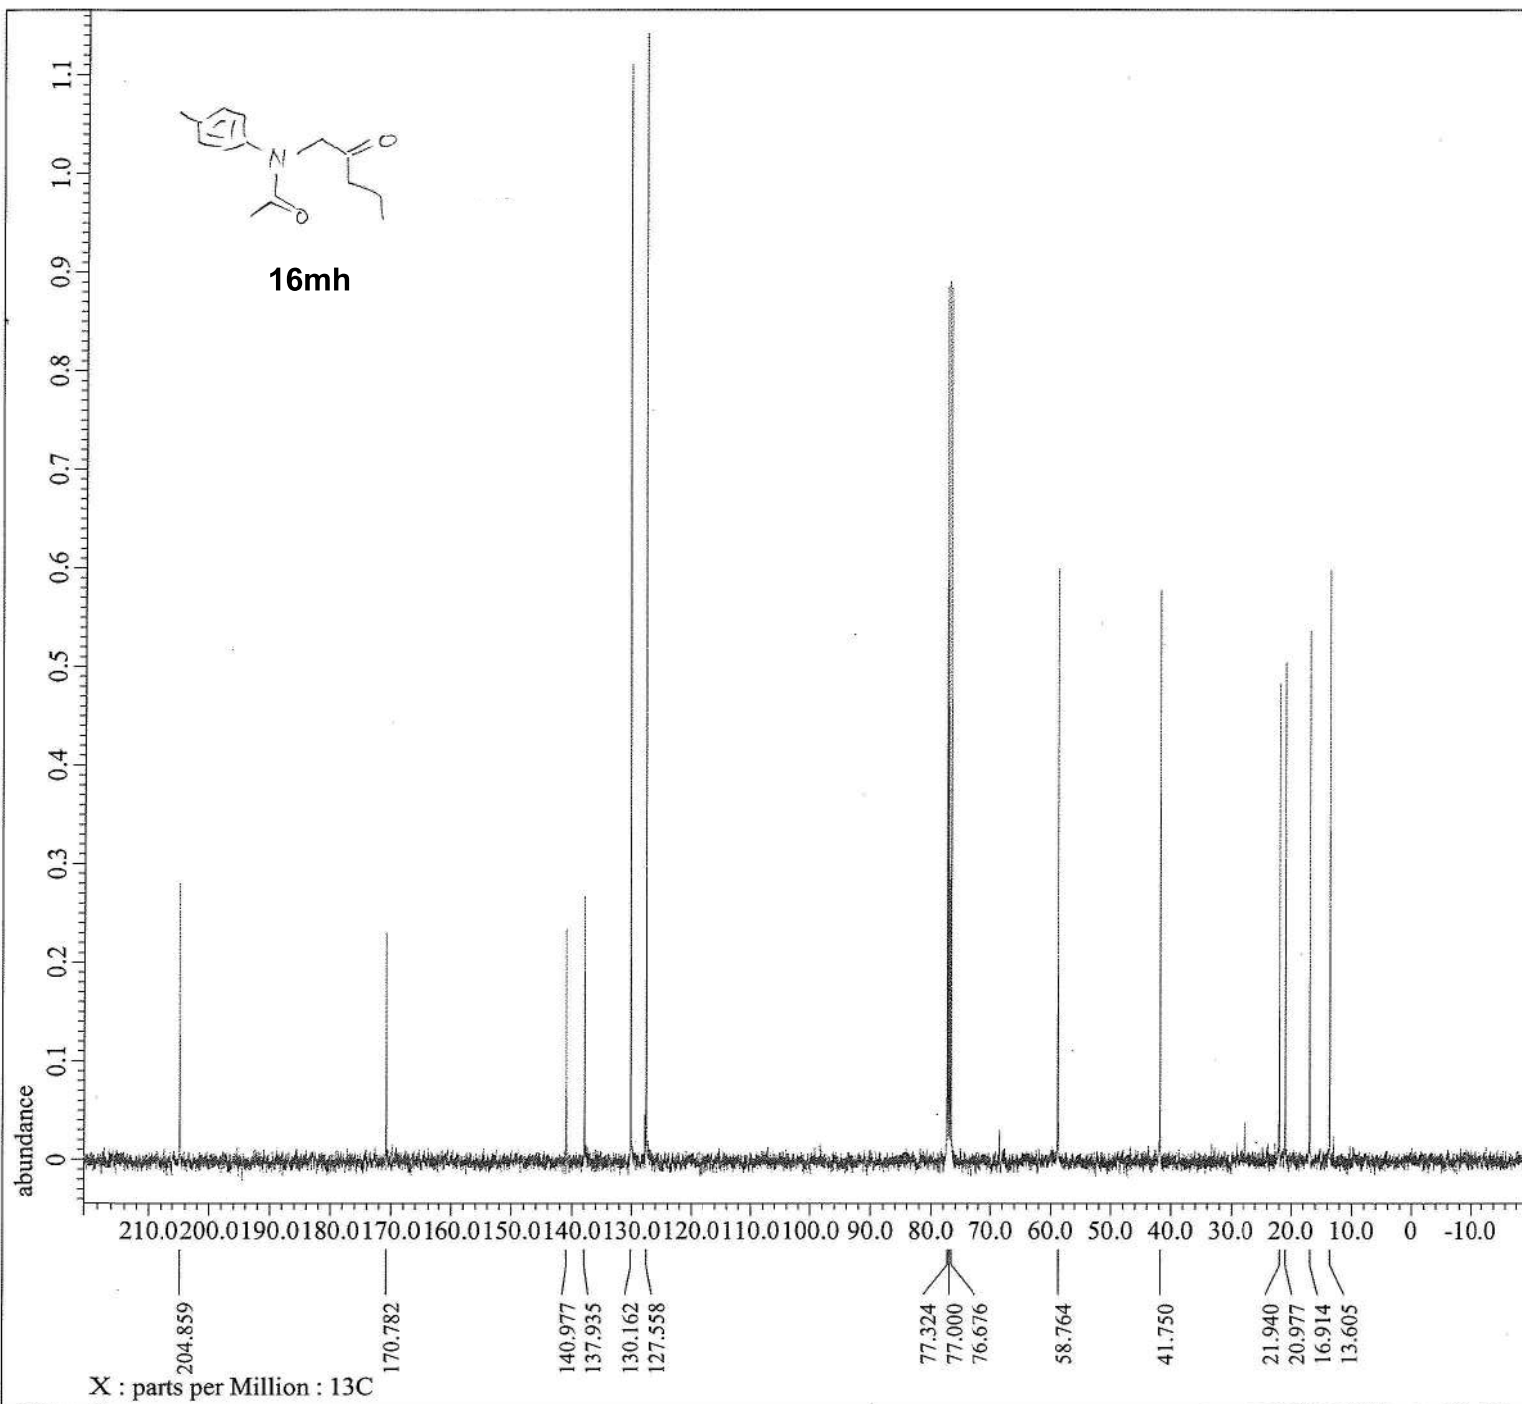

```

---- PROCESSING PARAMETERS ----
dc_balance( 0, FALSE )
sexp( 2.0[Hz], 0.0[s] )
trapezoid3( 0[%], 80[%], 100[%] )
zerofill( 1 )
fft( 1, TRUE, TRUE )
machinephase
ppm

```

以下に由来: KRY-142 pure C-1.jdf

```

Filename      = KRY-142 pure C-2.jdf
Author       = element
Experiment   = single_pulse_dec
Sample_Id    = S#425332
Solvent      = CHLOROFORM-D
Actual_Start_Time = 29-JUN-2021 18:29:04
Revision_Time  = 30-OCT-2021 10:11:41

Comment      = single pulse decoupled ga
Data Format   = 1D COMPLEX
Dim_Size     = 26214
X_Domain    = 13C
Dim_Title    = 13C
Dim_Units    = [ppm]
Dimensions   = X
Site         = ECS 400
Spectrometer = JNM-ECS400

Field Strength = 9.20197068[T] (390[MHz])
X_Acq_Duration = 1.06430464[s]
X_Domain       = 13C
X_Freq         = 98.51479726 [MHz]
X_Offset       = 100 [ppm]
X_Points       = 32768
X_Prescans     = 4
X_Resolution   = 0.93958061 [Hz]
X_Sweep        = 30.78817734 [kHz]
Irr_Domain     = 1H
Irr_Freq       = 391.78655441 [MHz]
Irr_Offset     = 5 [ppm]
Clipped        = FALSE
Scans          = 200
Total_Scans    = 200

Relaxation_Delay = 2 [s]
Recvr_Gain       = 60
Temp_Get         = 23.5 [dC]
X_90_Width      = 8.7 [us]
X_Acq_Time      = 1.06430464 [s]
X_Angle         = 30 [deg]
X_Atn           = 4.9 [dB]
X_Pulse         = 2.9 [us]
Irr_Atn_Dec     = 22.45 [dB]
Irr_Atn_No     = 22.45 [dB]
Irr_Noise       = WALTZ
Decoupling      = TRUE
Initial_Wait    = 1 [s]
Noe              = TRUE
Noe_Time        = 2 [s]
Repetition_Time = 3.06430464 [s]

```

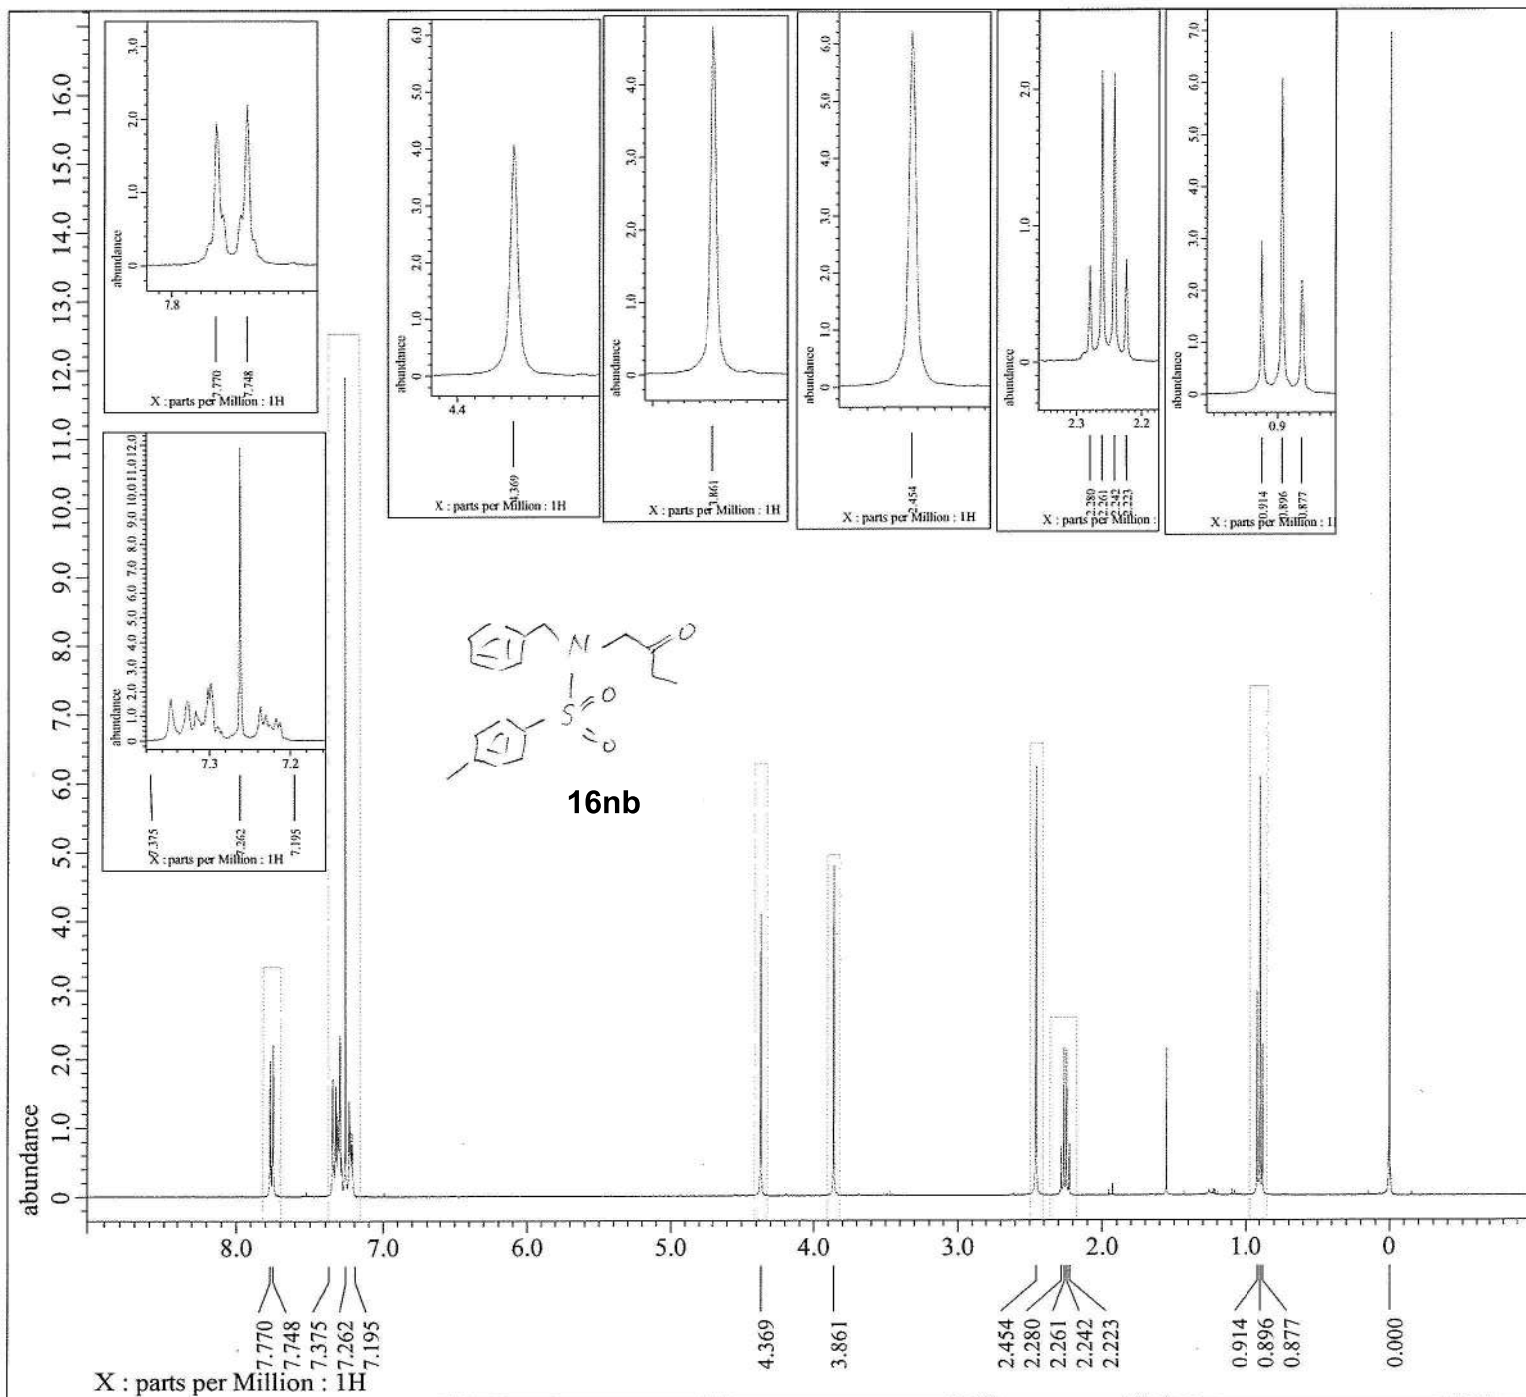

```

---- PROCESSING PARAMETERS ----
dc_balance( 0, FALSE )
sexp( 0.2[Hz], 0.0[s] )
trapezoid3( 0[%], 80[%], 100[%] )
zerofill( 1 )
fft( 1, TRUE, TRUE )
machinephase
ppm

以下に由来: KRY-109 pure-1.jdf

```

```

Filename      = KRY-109 pure-2.jdf
Author       = element
Experiment    = single_pulse.ex2
Sample Id    = S#486150
Solvent      = CHLOROFORM-D
Actual_Start Time = 9-MAR-2021 20:24:11
Revision_Time = 2-AUG-2021 17:06:04

```

```

Comment      = single_pulse
Data_Format  = 1D COMPLEX
Dim_Size     = 13107
X_Domain    = 1H
Dim_Title   = 1H
Dim_Units   = [ppm]
Dimensions  = X
Site        = ECS 400
Spectrometer = JNM-ECS400

```

```

Field_Strength = 9.20197068[T] (390[MHz])
X_Acq_Duration = 2.228224[s]
X_Domain      = 1H
X_Freq       = 391.78655441[MHz]
X_Offset     = 5[ppm]
X_Points     = 16384
X_Prescans   = 1
X_Resolution = 0.44878791[Hz]
X_Sweep      = 7.35294118[kHz]
Irr_Domain   = 1H
Irr_Freq    = 391.78655441[MHz]
Irr_Offset   = 5[ppm]
Tri_Domain   = 1H
Tri_Freq    = 391.78655441[MHz]
Tri_Offset   = 5[ppm]
Clipped     = FALSE
Scans       = 8
Total_Scans = 8

```

```

Relaxation_Delay = 5[s]
Recvr_Gain       = 56
Temp_Get        = 18.5[dC]
X_90_Width     = 10.8[us]
X_Acq_Time     = 2.228224[s]
X_Angle        = 45[deg]
X_Atn          = 1.9[dB]
X_Pulse        = 5.4[us]
Irr_Mode       = Off
Tri_Mode       = Off
Dante_Preset   = FALSE
Initial_Wait   = 1[s]
Repetition_Time = 7.228224[s]

```

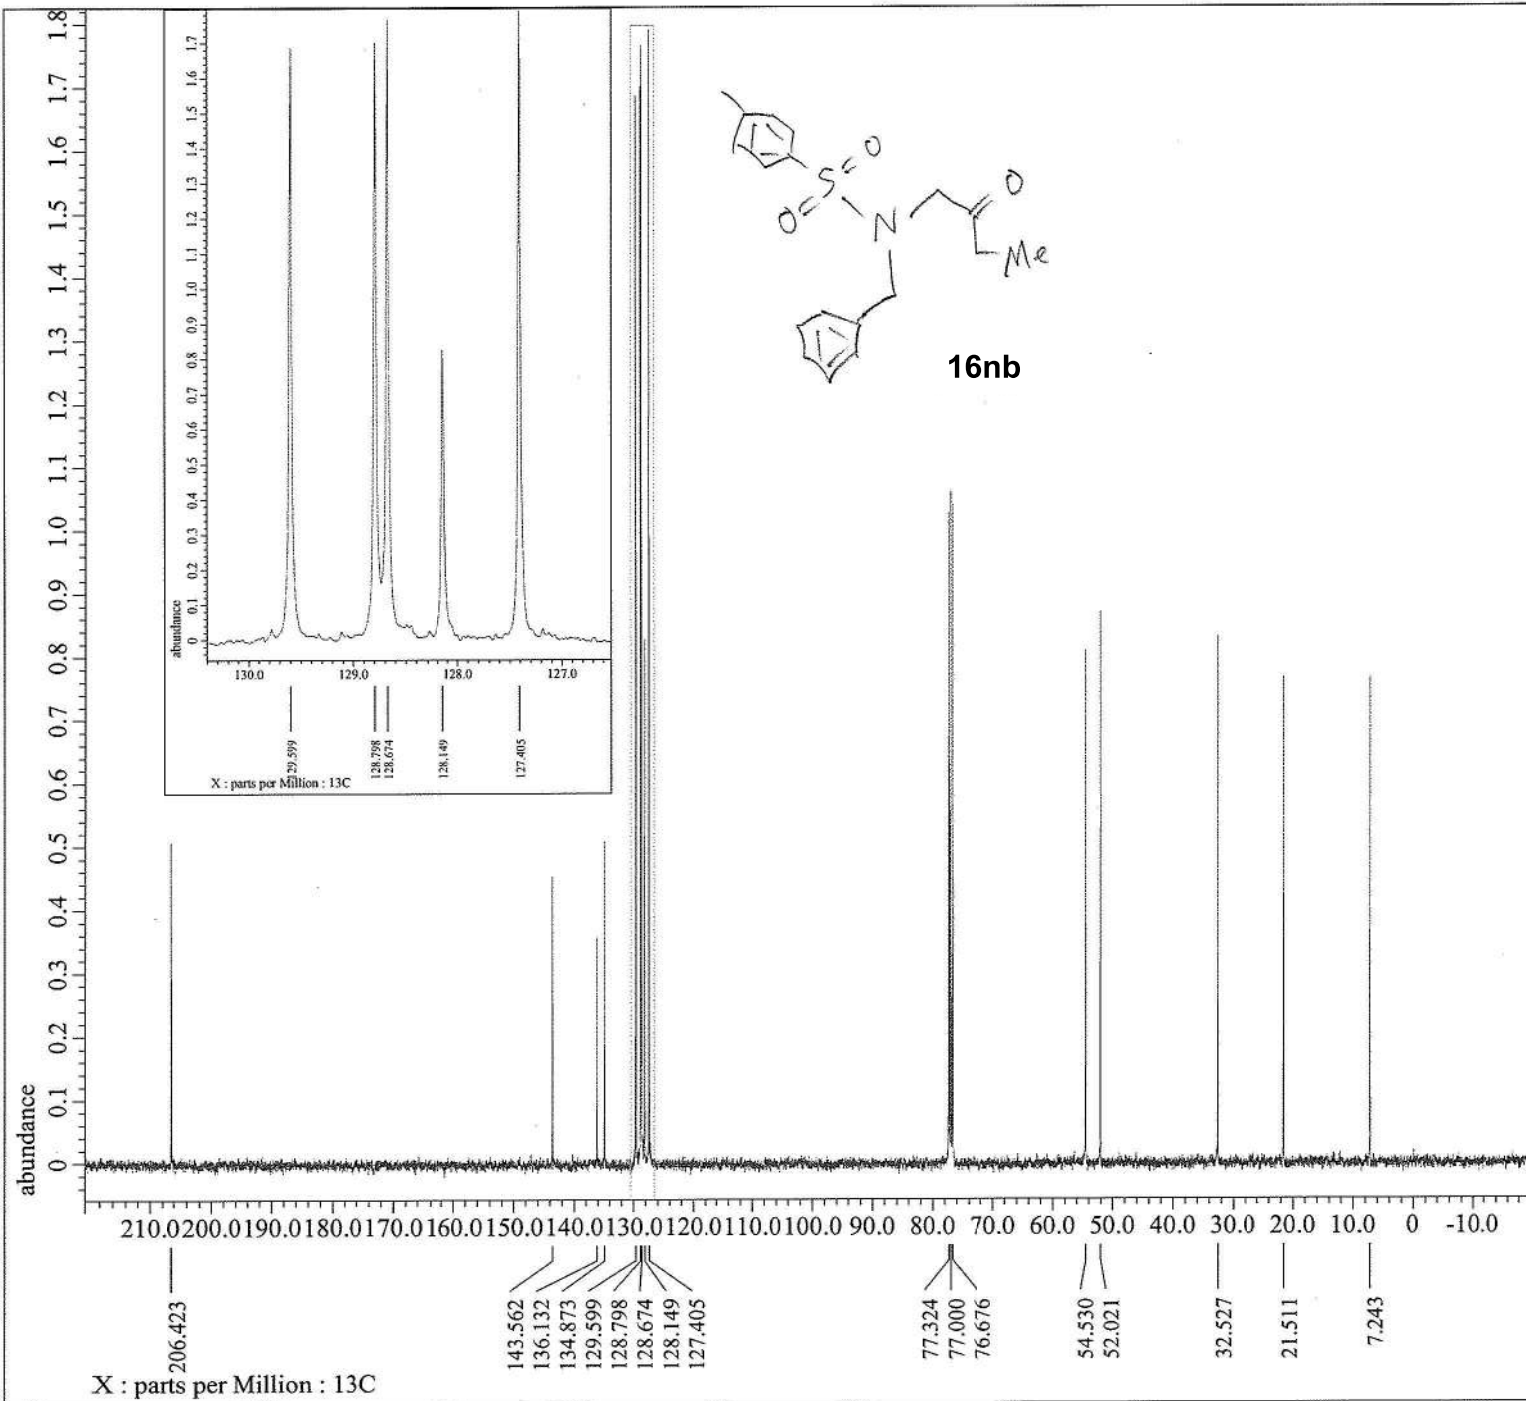

```

---- PROCESSING PARAMETERS ----
dc_balance( 0, FALSE )
sexp( 2.0[Hz], 0.0[s] )
trapezoid3( 0[%], 80[%], 100[%] )
zerofill( 1 )
fft( 1, TRUE, TRUE )
machinephase
ppm
以下に由来: KRY-109 C-1.jdf

```

```

Filename      = KRY-109 C-2.jdf
Author       = element
Experiment   = single_pulse_dec
Sample Id    = S#535486
Solvent      = CHLOROFORM-D
Actual_Start_Time = 9-MAR-2021 21:45:58
Revision_Time  = 25-OCT-2021 20:53:05

```

```

Comment      = single pulse decoupled ga
Data Format   = 1D COMPLEX
Dim Size     = 26214
X_Domain     = 13C
Dim Title    = 13C
Dim Units    = [ppm]
Dimensions   = X
Site         = ECS 400
Spectrometer = JNM-ECS400

```

```

Field Strength = 9.20197068[T] (390[MHz])
X_Acq Duration = 1.06430464[s]
X_Domain       = 13C
X_Freq         = 98.51479726 [MHz]
X_Offset       = 100 [ppm]
X_Points       = 32768
X_Prescans     = 4
X_Resolution   = 0.93958061 [Hz]
X_Sweep        = 30.78817734 [kHz]
Irr_Domain     = 1H
Irr_Freq       = 391.78655441 [MHz]
Irr_Offset     = 5 [ppm]
Clipped        = FALSE
Scans          = 200
Total_Scans    = 200

```

```

Relaxation_Delay = 2 [s]
Recvr_Gain       = 60
Temp_Get         = 18.8 [dC]
X_90_Width      = 8.7 [us]
X_Acq Time       = 1.06430464 [s]
X_Angle         = 30 [deg]
X_Atn           = 4.9 [dB]
X_Pulse         = 2.9 [us]
Irr_Atn_Dec     = 22.45 [dB]
Irr_Atn_No     = 22.45 [dB]
Irr_Noise       = WALTZ
Decoupling      = TRUE
Initial_Wait    = 1 [s]
Noe              = TRUE
Noe Time        = 2 [s]
Repetition_Time = 3.06430464 [s]

```



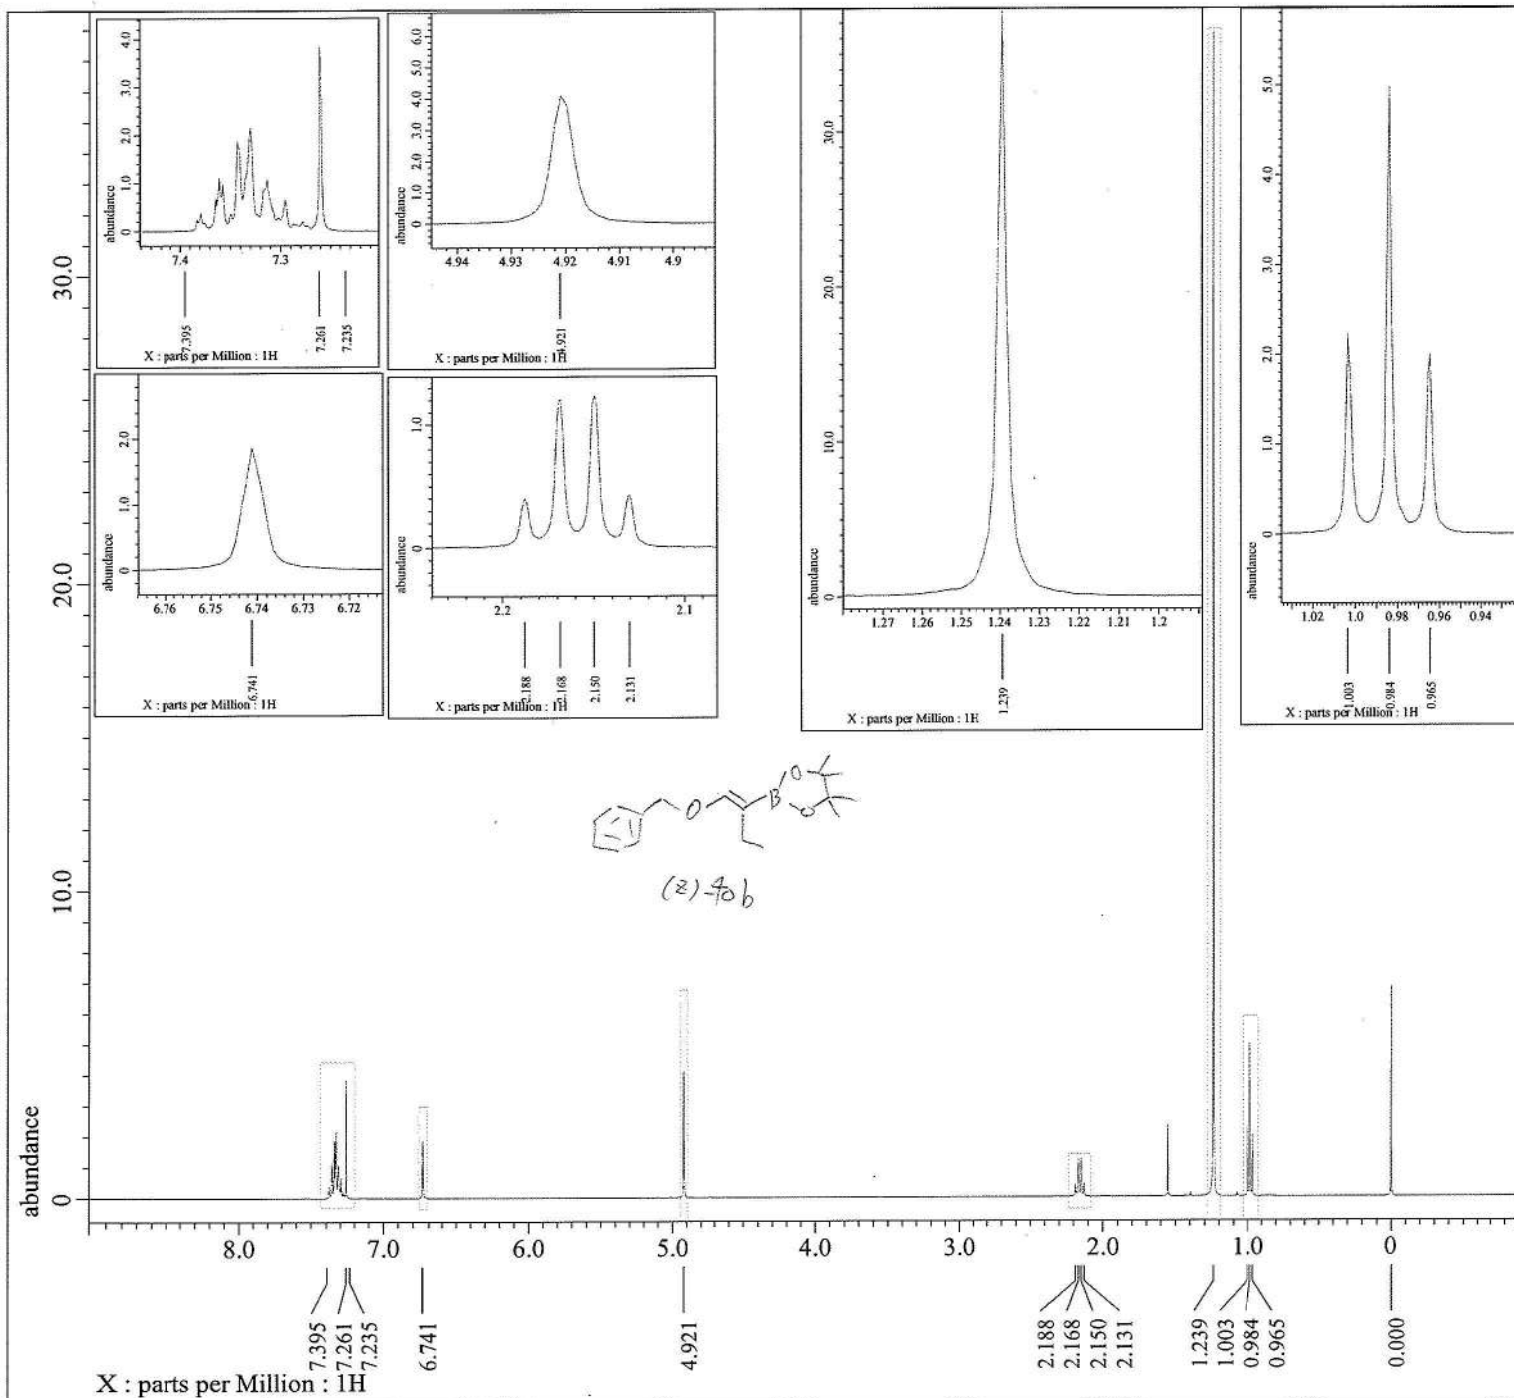

```

---- PROCESSING PARAMETERS ----
dc_balance( 0, FALSE )
sexp( 0.2[Hz], 0.0[s] )
trapezoid3( 0[%], 80[%], 100[%] )
zerofill( 1 )
fft( 1, TRUE, TRUE )
machinephase
ppm

以下に由来.: KRY-137(2) pure-1.jdf

```

```

Filename      = KRY-137(2) pure-2.jdf
Author        = element
Experiment    = single_pulse.ex2
Sample_Id     = S#348665
Solvent       = CHLOROFORM-D
Actual_Start_Time = 21-JUN-2021 16:22:13
Revision_Time  = 11-AUG-2021 15:16:37

```

```

Comment       = single_pulse
Data Format    = 1D COMPLEX
Dim Size      = 13107
X_Domain      = 1H
Dim Title     = 1H
Dim Units     = [ppm]
Dimensions    = X
Site          = ECS 400
Spectrometer  = JNM-ECS400

```

```

Field Strength = 9.20197068[T] (390 [MHz])
X_Acq_Duration = 2.228224[s]
X_Domain       = 1H
X_Freq         = 391.78655441 [MHz]
X_Offset       = 5 [ppm]
X_Points       = 16384
X_Prescans     = 1
X_Resolution   = 0.44878791 [Hz]
X_Sweep        = 7.35294118 [kHz]
Irr_Domain     = 1H
Irr_Freq       = 391.78655441 [MHz]
Irr_Offset     = 5 [ppm]
Tri_Domain     = 1H
Tri_Freq       = 391.78655441 [MHz]
Tri_Offset     = 5 [ppm]
Clipped       = FALSE
Scans          = 8
Total_Scans    = 8

```

```

Relaxation_Delay = 5 [s]
Recvr_Gain       = 50
Temp_Get         = 20.4 [dC]
X_90_Width      = 10.8 [us]
X_Acq_Time      = 2.228224 [s]
X_Angle         = 45 [deg]
X_Atn           = 1.9 [dB]
X_Pulse         = 5.4 [us]
Irr_Mode        = Off
Tri_Mode        = Off
Dante_Presat    = FALSE
Initial_Wait    = 1 [s]
Repetition_Time = 7.228224 [s]

```

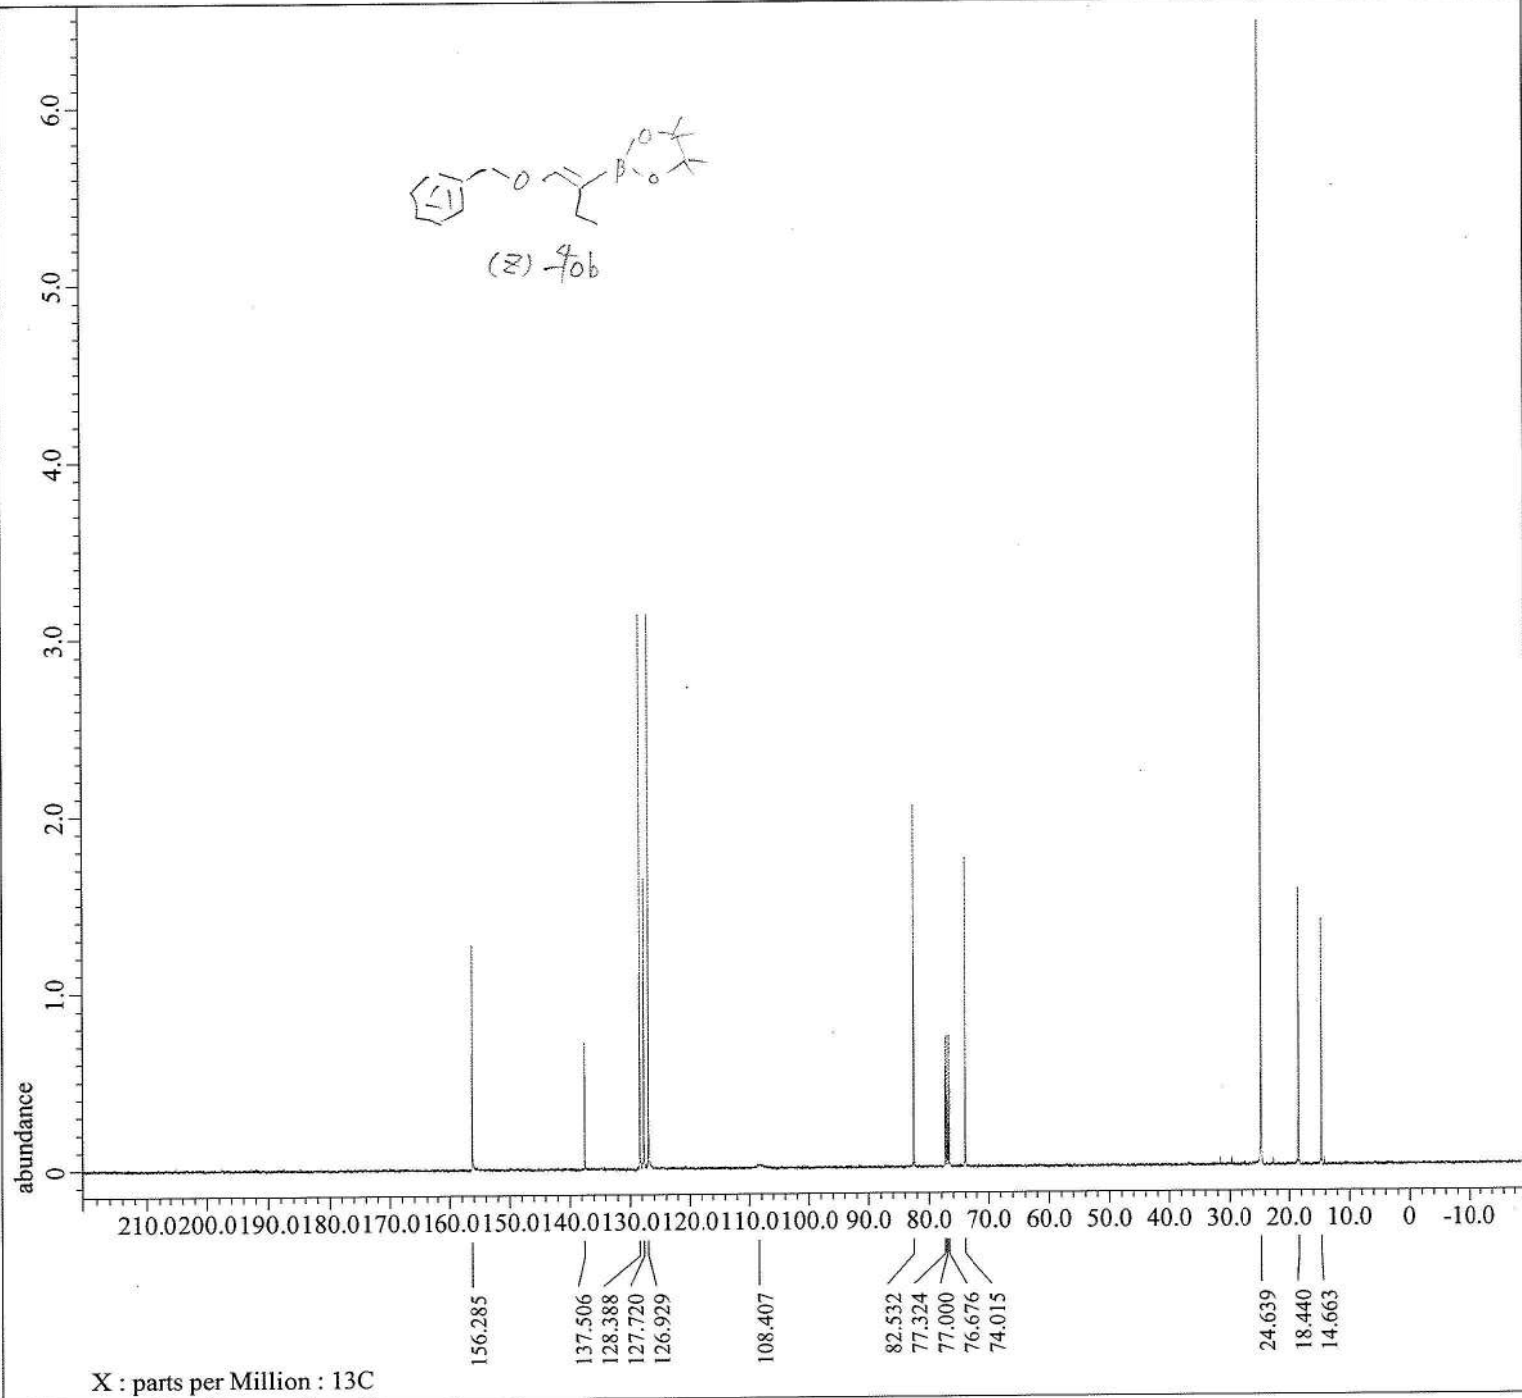

```

---- PROCESSING PARAMETERS ----
dc_balance( 0, FALSE )
sexp( 2.0[Hz], 0.0[s] )
trapezoid3( 0[%], 80[%], 100[%] )
zerofill( 1 )
fft( 1, TRUE, TRUE )
machinephase
ppm

以下に由来: KRY-137(2) pure C-1.jdf

Filename      = KRY-137(2) pure C-2.jdf
Author       = element
Experiment   = single_pulse_dec
Sample_Id    = S#365799
Solvent      = CHLOROFORM-D
Actual_Start_Time = 21-JUN-2021 16:50:32
Revision_Time  = 23-OCT-2021 15:27:10

Comment      = single pulse decoupled ga
Data_Format  = 1D COMPLEX
Dim_Size     = 26214
X_Domain    = 13C
Dim_Title   = 13C
Dim_Units   = [ppm]
Dimensions  = X
Site        = ECS 400
Spectrometer = JNM-ECS400

Field_Strength = 9.20197068[T] (390[MHz])
X_Acq_Duration = 1.06430464[s]
X_Domain      = 13C
X_Freq       = 98.51479726 [MHz]
X_Offset     = 100 [ppm]
X_Points     = 32768
X_Prescans   = 4
X_Resolution = 0.93958061[Hz]
X_Sweep     = 30.78817734 [kHz]
Irr_Domain   = 1H
Irr_Freq    = 391.78655441 [MHz]
Irr_Offset  = 5 [ppm]
Clipped     = FALSE
Scans       = 200
Total_Scans = 200

Relaxation_Delay = 2 [s]
Recvr_Gain      = 60
Temp_Get       = 21.4 [dC]
X_90_Width     = 8.7 [us]
X_Acq_Time     = 1.06430464 [s]
X_Angle       = 30 [deg]
X_Atn        = 4.9 [dB]
X_Pulse      = 2.9 [us]
Irr_Atn_Dec  = 22.45 [dB]
Irr_Atn_NoE = 22.45 [dB]
Irr_Noise    = WALTZ
Decoupling    = TRUE
Initial_Wait  = 1 [s]
Noe           = TRUE
Noe_Time     = 2 [s]
Repetition_Time = 3.06430464 [s]
  
```

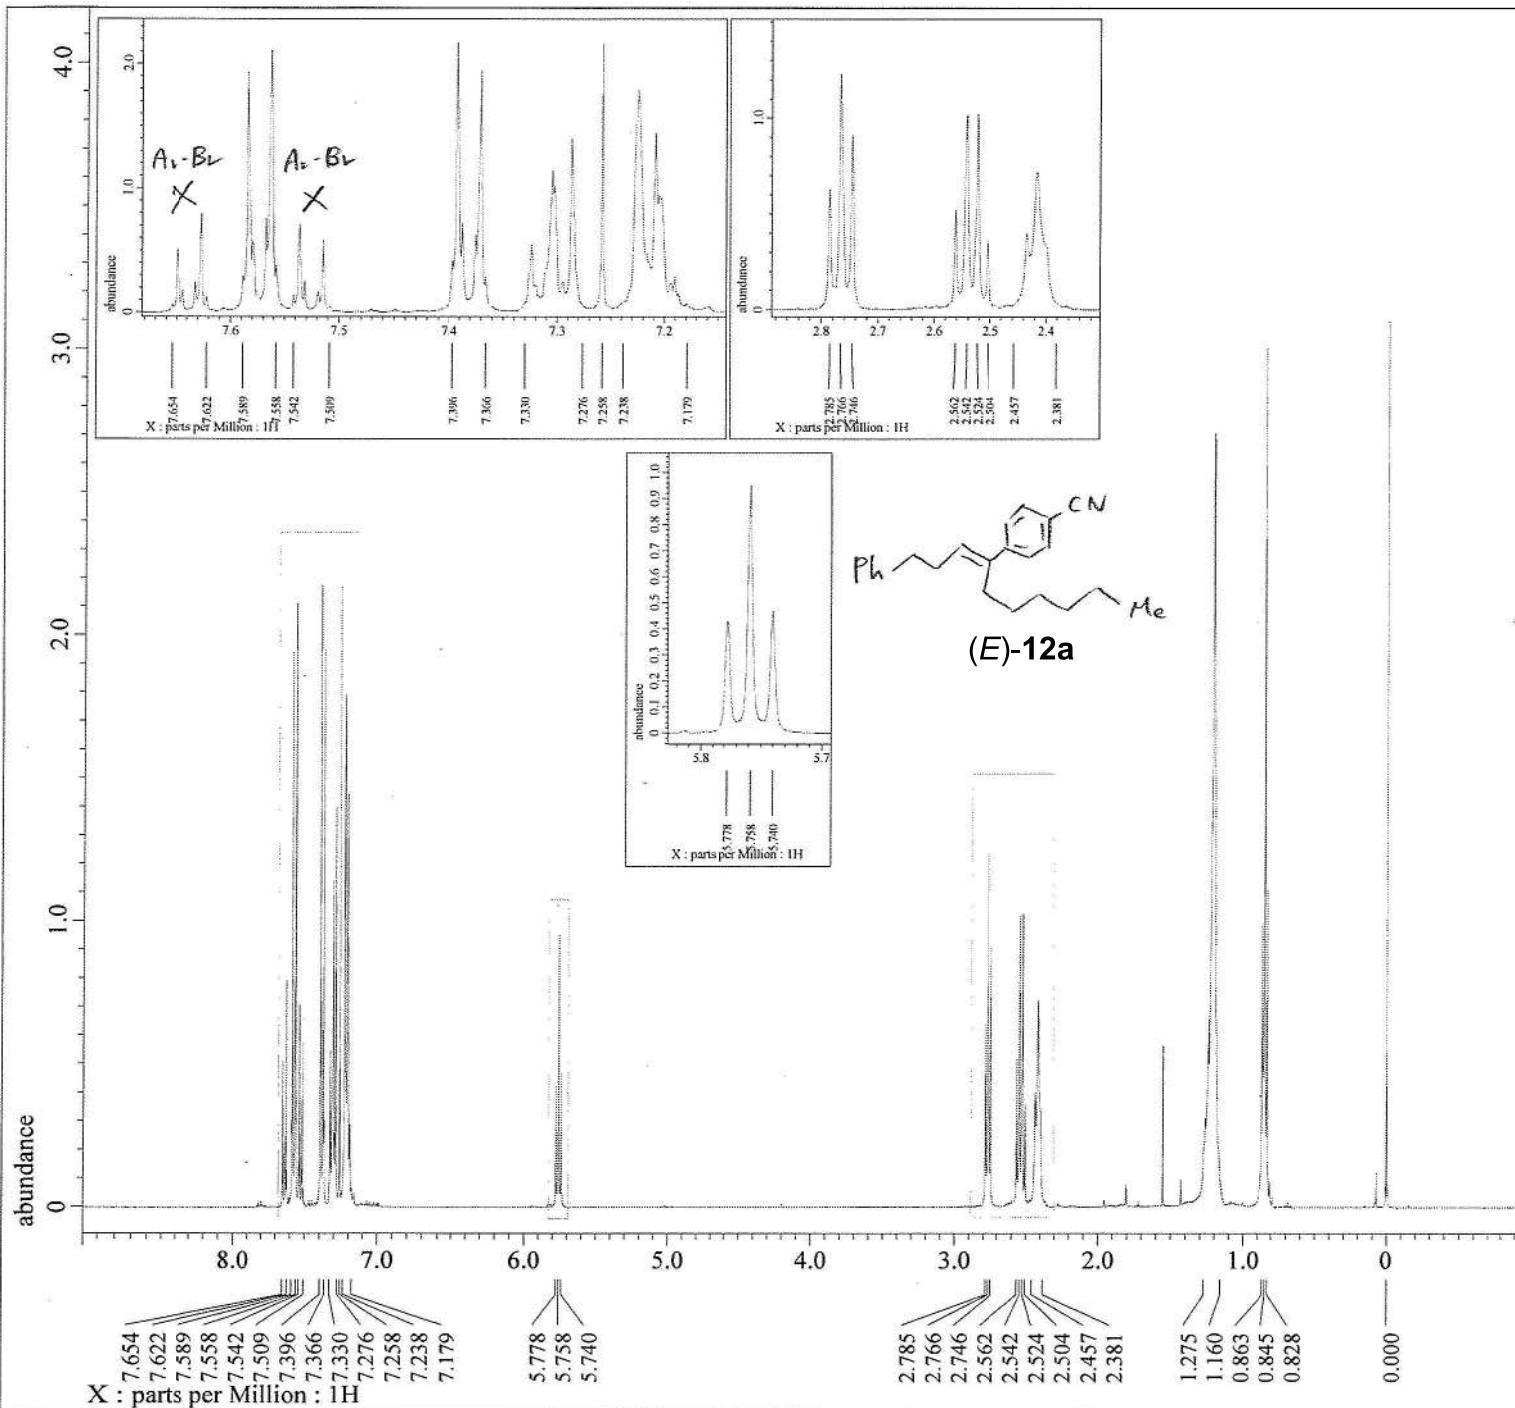

```

---- PROCESSING PARAMETERS ----
dc balance( 0, FALSE )
sexp( 0.2[Hz], 0.0[s] )
trapezoid3( 0[%], 80[%], 100[%] )
zerofill( 1, TRUE )
fft( 1, TRUE, TRUE )
machinephase
ppm
Derived from: EDK-322-pure-1.jdf

```

```

Filename      = EDK-322-pure-2.jdf
Author       = element
Experiment    = single_pulse.ex2
Sample Id    = S#599477
Solvent      = CHLOROFORM-D
Actual Start Time = 13-JAN-2022 23:32:14
Revision Time = 14-JAN-2022 13:03:19

```

```

Comment      = single_pulse
Data Format   = 1D_COMPLEX
Dim Size     = 13107
X Domain     = 1H
Dim Title    = 1H
Dim Units    = [ppm]
Dimensions   = X
Site         = ECS 400
Spectrometer = JNM-ECS400

```

```

Field Strength = 9.20197068[T] (390[MHz])
X Acq Duration = 2.228224[s]
X Domain       = 1H
X Freq        = 391.78655441[MHz]
X Offset      = 5[ppm]
X Points      = 16384
X Prescans    = 1
X Resolution   = 0.44878791[Hz]
X Sweep       = 7.35294118[kHz]
Irr Domain    = 1H
Irr Freq      = 391.78655441[MHz]
Irr Offset    = 5[ppm]
Tri Domain    = 1H
Tri Freq      = 391.78655441[MHz]
Tri Offset    = 5[ppm]
Clipped       = FALSE
Scans         = 8
Total Scans   = 8

```

```

Relaxation Delay = 5[s]
Recvr Gain       = 40
Temp Get         = 19.6[dc]
X 90 Width      = 10.8[us]
X Acq Time      = 2.228224[s]
X Angle         = 45[deg]
X Atn           = 1.9[db]
X Pulse         = 5.4[us]
Irr Mode        = Off
Tri Mode        = Off
Dante Presat    = FALSE
Initial Wait    = 1[s]
Repetition Time = 7.228224[s]

```

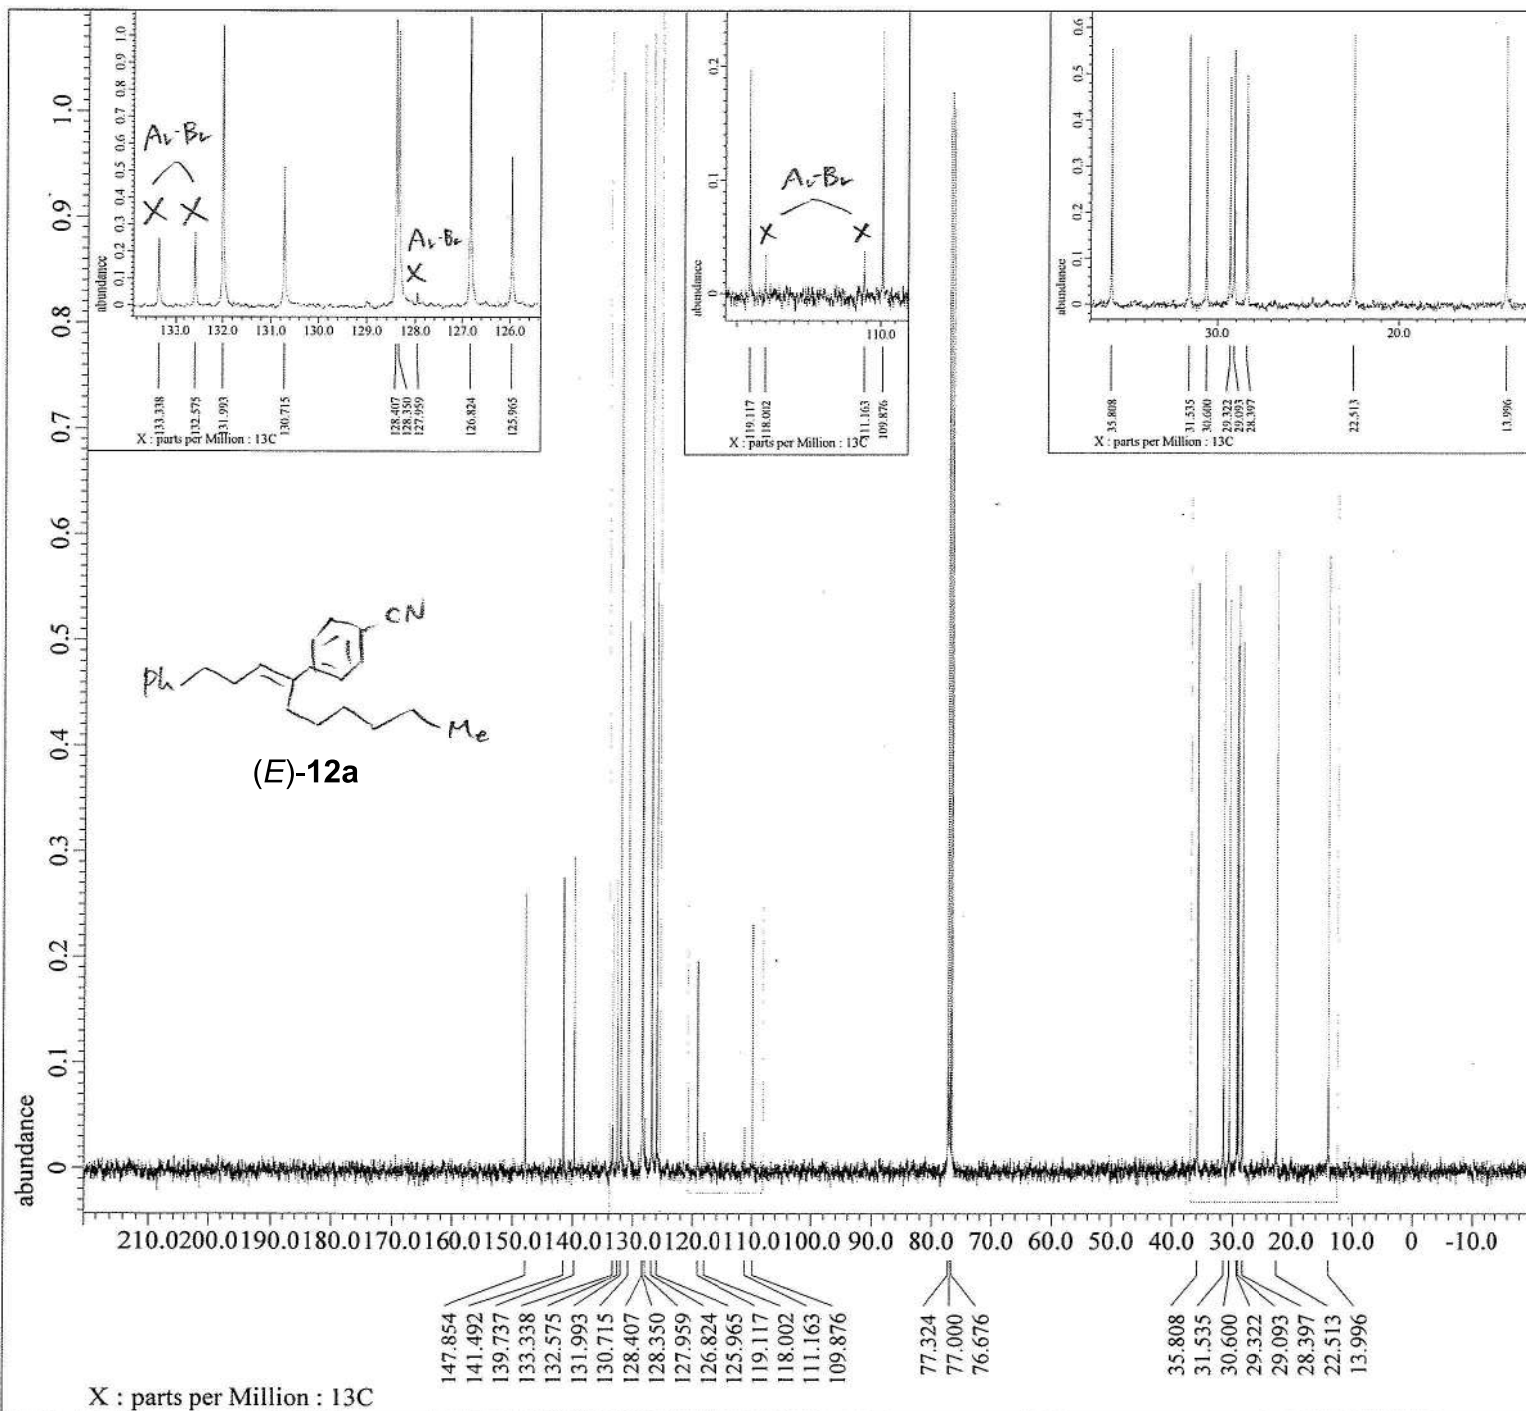

```

----- PROCESSING PARAMETERS -----
dc_balance( 0, FALSE )
sexp( 2.0[Hz], 0.0[s] )
trapezoid3( 0[%], 80[%], 100[%] )
zerofill( 1, TRUE )
fft( 1, TRUE, TRUE )
machinephase
ppm

Derived from: EDK-322-13C-1.jdf

Filename      = EDK-322-13C-2.jdf
Author       = element
Experiment   = single_pulse_dec
Sample Id    = 1
Solvent      = CHLOROFORM-D
Actual_Start Time = 14-JAN-2022 01:00:06
Revision_Time = 14-JAN-2022 12:37:13

Comment      = single pulse decoupled ga
Data Format   = 1D COMPLEX
Dim Size     = 26214
X Domain     = 13C
Dim Title    = 13C
Dim Units    = [ppm]
Dimensions   = X
Site         = ECS 400
Spectrometer = JNM-ECS400

Field_Strength = 9.20197068[T] (390[MHz])
X_Acq_Duration = 1.06430464[s]
X_Domain       = 13C
X_Freq        = 98.51479726[MHz]
X_Offset      = 100[ppm]
X_Points      = 32768
X_Prescans    = 4
X_Resolution  = 0.93958061[Hz]
X_Sweep       = 30.78817734[kHz]
Irr_Domain    = 1H
Irr_Freq      = 391.78655441[MHz]
Irr_Offset    = 5[ppm]
Clipped       = FALSE
Scans         = 200
Total_Scans   = 200

Relaxation_Delay = 2[s]
Recvr_Gain      = 60
Temp_Get        = 20.4[dC]
X_90_Width     = 8.7[us]
X_Acq_Time     = 1.06430464[s]
X_Angle        = 30[deg]
X_Atn          = 4.9[dB]
X_Pulse        = 2.9[us]
Irr_Atn_Dec    = 22.45[dB]
Irr_Atn_No     = 22.45[dB]
Irr_Noise      = WALTZ
Decoupling     = TRUE
Initial_Wait   = 1[s]
Noe            = TRUE
Noe_Time       = 2[s]
Repetition_Time = 3.06430464[s]
  
```

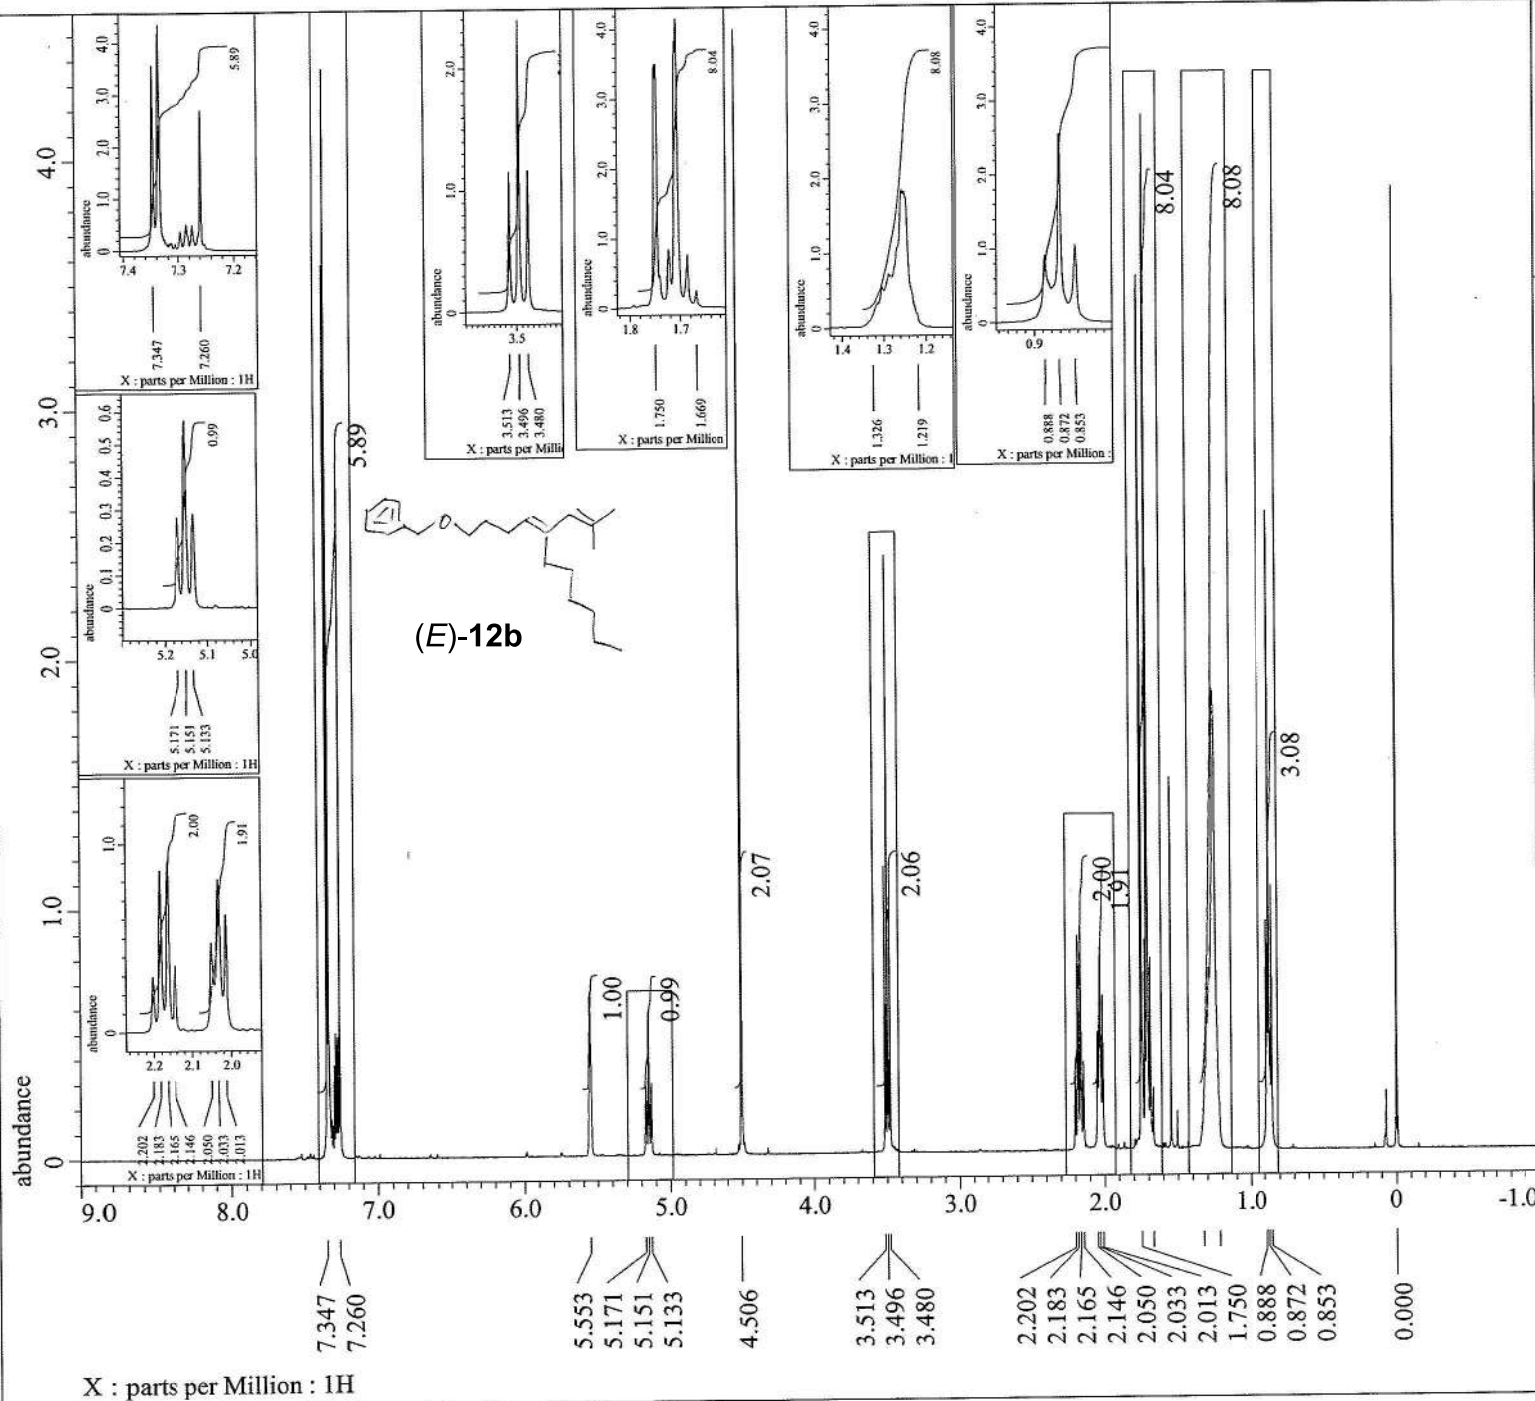

```

---- PROCESSING PARAMETERS ----
dc_balance( 0, FALSE )
sexp( 0.2[Hz], 0.0[s] )
trapezoid3( 0[%], 80[%], 100[%] )
zerofill( 1 )
fft( 1, TRUE, TRUE )
machinephase
ppm
以下に由来: SRT 141 OBn App 2-2.jdf

```

```

Filename      = SRT 141 OBn App 2-4.jdf
Author       = element
Experiment    = single_pulse.ex2
Sample_Id    = S#780586
Solvent      = CHLOROFORM-D
Actual_Start_Time = 15-JUL-2021 04:39:47
Revision_Time  = 2-OCT-2021 16:40:36

```

```

Comment      = single_pulse
Data_Format  = 1D COMPLEX
Dim_Size     = 13107
Dim_Title    = 1H
Dim_Units    = [ppm]
Dimensions   = X
Site         = ECS 400
Spectrometer = JNM-ECS400

```

```

Field_Strength = 9.20197068[T] (390[MHz])
X_Acq_Duration = 2.228224[s]
X_Domain       = 1H
X_Freq         = 391.78655441[MHz]
X_Offset       = 5[ppm]
X_Points       = 16384
X_Prescans     = 1
X_Resolution   = 0.44878791[Hz]
X_Sweep        = 7.35294118[kHz]
Irr_Domain     = 1H
Irr_Freq       = 391.78655441[MHz]
Irr_Offset     = 5[ppm]
Tri_Domain     = 1H
Tri_Freq       = 391.78655441[MHz]
Tri_Offset     = 5[ppm]
Clipped        = FALSE
Scans          = 8
Total_Scans    = 8

```

```

Relaxation_Delay = 5[s]
Recvr_Gain       = 46
Temp_Get         = 20.6[dC]
X_90_Width      = 10.8[us]
X_Acq_Time       = 2.228224[s]
X_Angle          = 45[deg]
X_Atn            = 1.9[dB]
X_Pulse          = 5.4[us]
Irr_Mode         = Off
Tri_Mode         = Off
Dante_Presat     = FALSE
Initial_Wait     = 1[s]
Repetition_Time  = 7.228224[s]

```

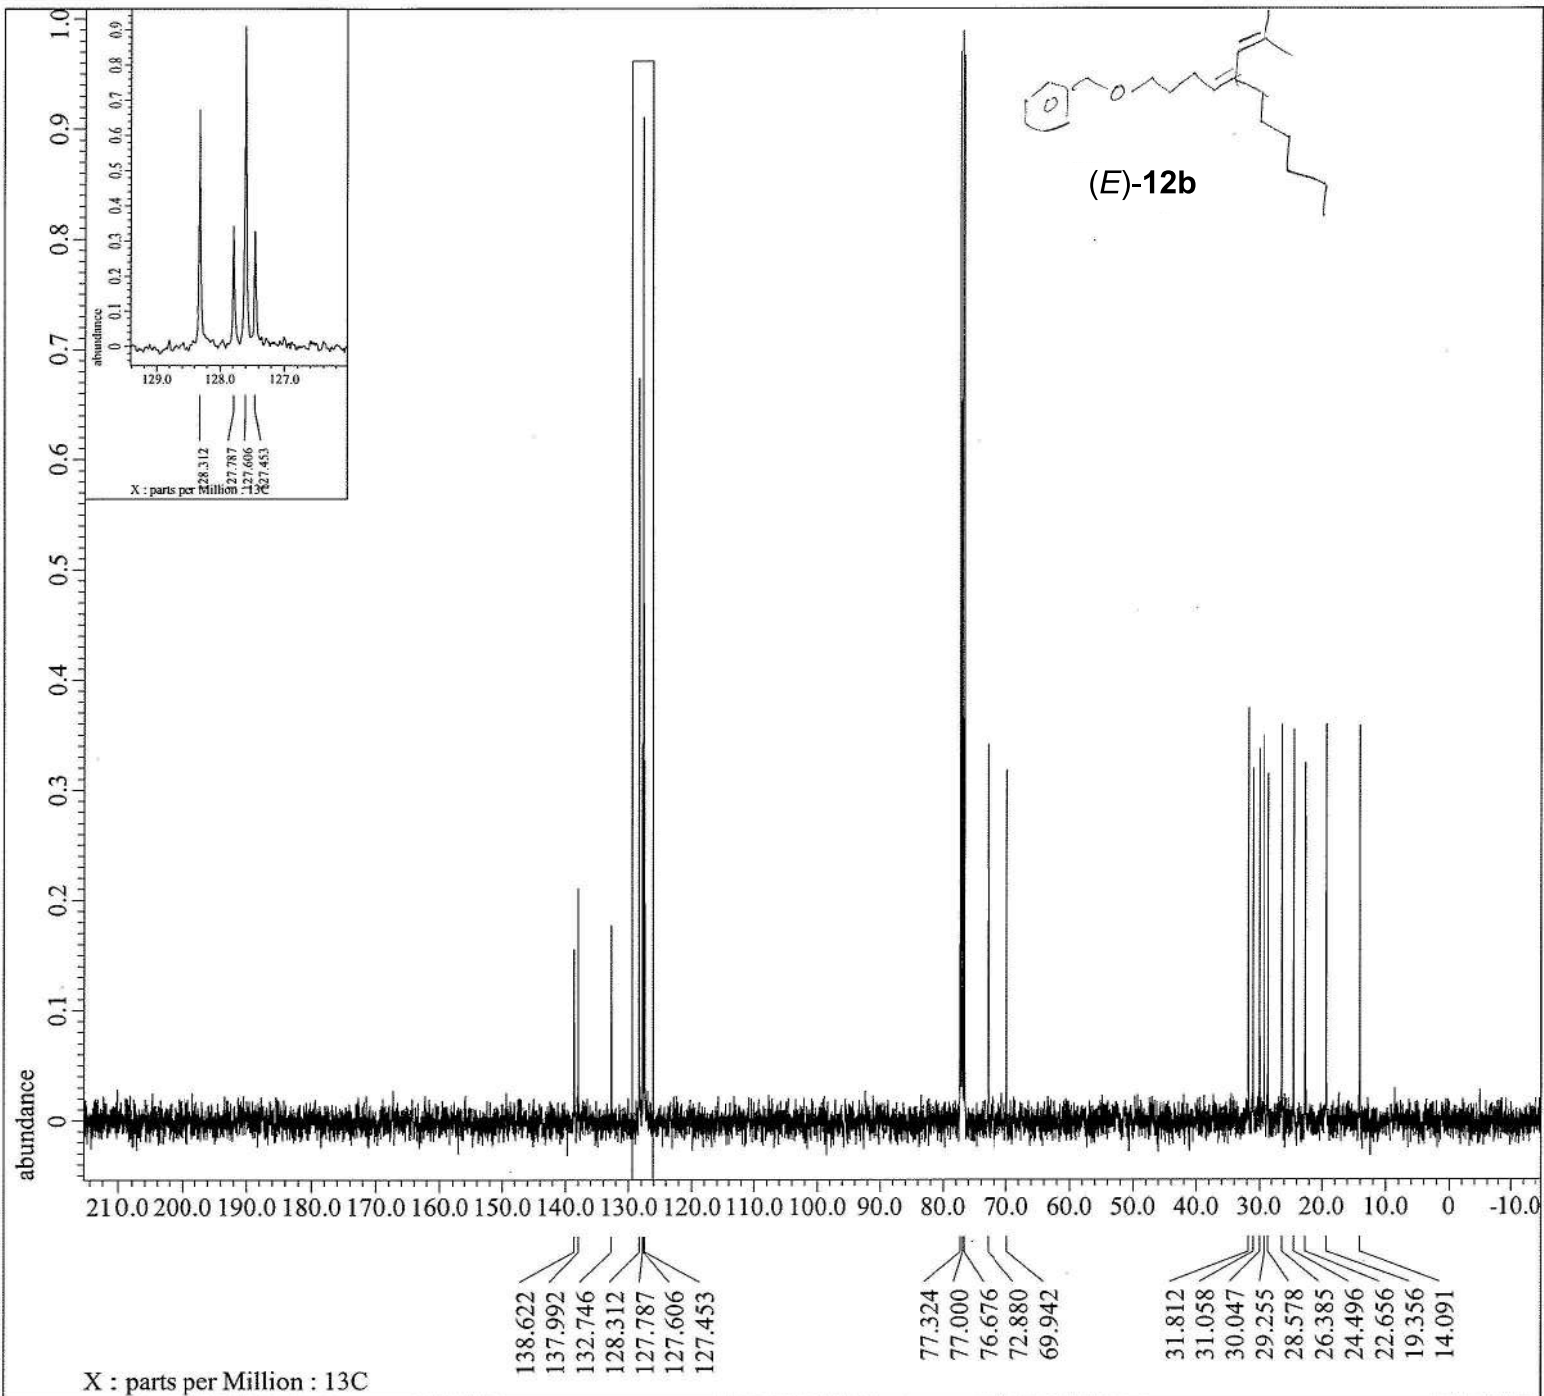

```

---- PROCESSING PARAMETERS ----
dc_balance( 0, FALSE )
sexp( 2.0[Hz], 0.0[s] )
trapezoid3( 0[%], 80[%], 100[%] )
zerofill( 1 )
fft( 1, TRUE, TRUE )
machinephase
ppm

以下に由来: SRT 141 OBn App 13C-2.jdf

```

```

Filename      = SRT 141 OBn App 13C-4.jdf
Author       = element
Experiment    = single_pulse_dec
Sample_Id    = 1
Solvent      = CHLOROFORM-D
Actual_Start_Time = 15-JUL-2021 16:43:46
Revision_Time = 15-JUL-2021 10:26:34

Comment      = single pulse decoupled ga
Data_Format  = 1D COMPLEX
Dim_Size     = 26214
Dim_Title    = 13C
Dim_Units    = [ppm]
Dimensions   = X
Site         = ECS 400
Spectrometer = JNM-ECS400

```

```

Field_Strength = 9.20197068[T] (390[MHz])
X_Acq_Duration = 1.06430464[s]
X_Domain       = 13C
X_Freq         = 98.51479726[MHz]
X_Offset       = 100[ppm]
X_Points       = 32768
X_Prescans     = 4
X_Resolution   = 0.93958061[Hz]
X_Sweep        = 30.78817734[kHz]
Irr_Domain     = 1H
Irr_Freq       = 391.78655441[MHz]
Irr_Offset     = 5[ppm]
Clipped       = TRUE
Scans          = 59
Total_Scans    = 59

```

```

Relaxation_Delay = 2[s]
Recvr_Gain       = 60
Temp_Get         = 20.9[dC]
X_90_Width      = 8.7[us]
X_Acq_Time       = 1.06430464[s]
X_Angle         = 30[deg]
X_Atn           = 4.9[dB]
X_Pulse         = 2.9[us]
Irr_Atn_Dec     = 22.45[dB]
Irr_Atn_No     = 22.45[dB]
Irr_Noise       = WALTZ
Decoupling      = TRUE
Initial_Wait    = 1[s]
Noe              = TRUE
Noe_Time        = 2[s]
Repetition_Time = 3.06430464[s]

```

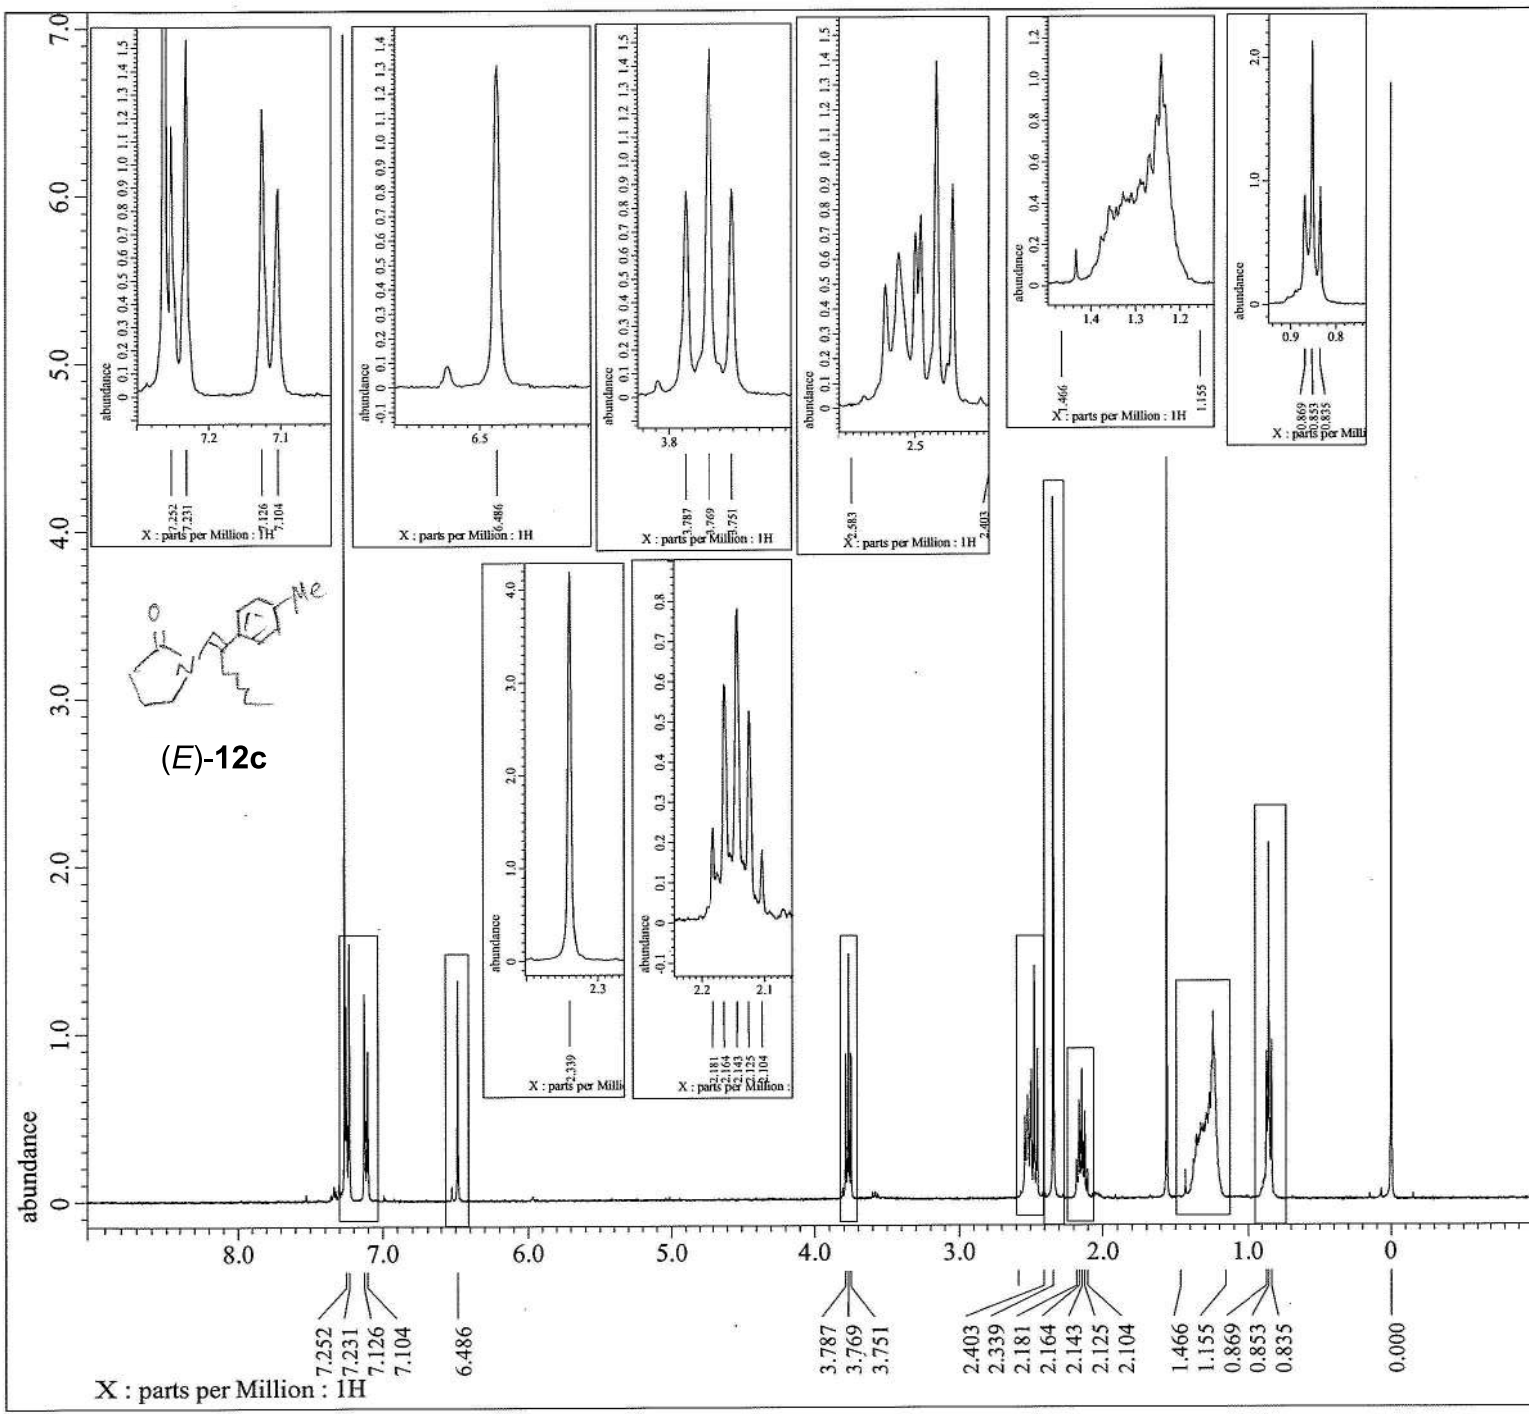

```

---- PROCESSING PARAMETERS ----
dc_balance( 0, FALSE )
sexp( 0.2[Hz], 0.0[s] )
trapezoid3( 0[%], 80[%], 100[%] )
zerofill( 1 )
fft( 1, TRUE, TRUE )
machinephase
ppm

以下に由来: KRY-145 pure-1.jdf

Filename      = KRY-145 pure-2.jdf
Author        = element
Experiment    = single_pulse.ex2
Sample Id     = S#573496
Solvent       = CHLOROFORM-D
Actual_Start_Time = 2-JUL-2021 22:35:38
Revision_Time  = 4-FEB-2022 10:31:08

Comment       = single_pulse
Data_Format   = 1D COMPLEX
Dim Size      = 13107
X_Domain      = 1H
Dim Title     = 1H
Dim Units     = [ppm]
Dimensions    = X
Site          = ECS 400
Spectrometer  = JNM-BCS400

Field_Strength = 9.20197068[T] (390[MHz])
X_Acq_Duration = 2.228224[s]
X_Domain       = 1H
X_Freq         = 391.78655441[MHz]
X_Offset       = 5[ppm]
X_Points       = 16384
X_Prescans     = 1
X_Resolution   = 0.44878791[Hz]
X_Sweep        = 7.35294118[kHz]
Irr_Domain     = 1H
Irr_Freq       = 391.78655441[MHz]
Irr_Offset     = 5[ppm]
Tri_Domain     = 1H
Tri_Freq       = 391.78655441[MHz]
Tri_Offset     = 5[ppm]
Clipped        = FALSE
Scans          = 8
Total_Scans    = 8

Relaxation_Delay = 5[s]
Recvr Gain       = 56
Temp_Get         = 19.9[dc]
X_90_Width      = 10.8[us]
X_Acq Time      = 2.228224[s]
X_Angle         = 45[deg]
X_Atn           = 1.9[db]
X_Pulse         = 5.4[us]
Irr_Mode        = Off
Tri_Mode        = Off
Dante_Preset    = FALSE
Initial_Wait    = 1[s]
Repetition_Time = 7.228224[s]

```

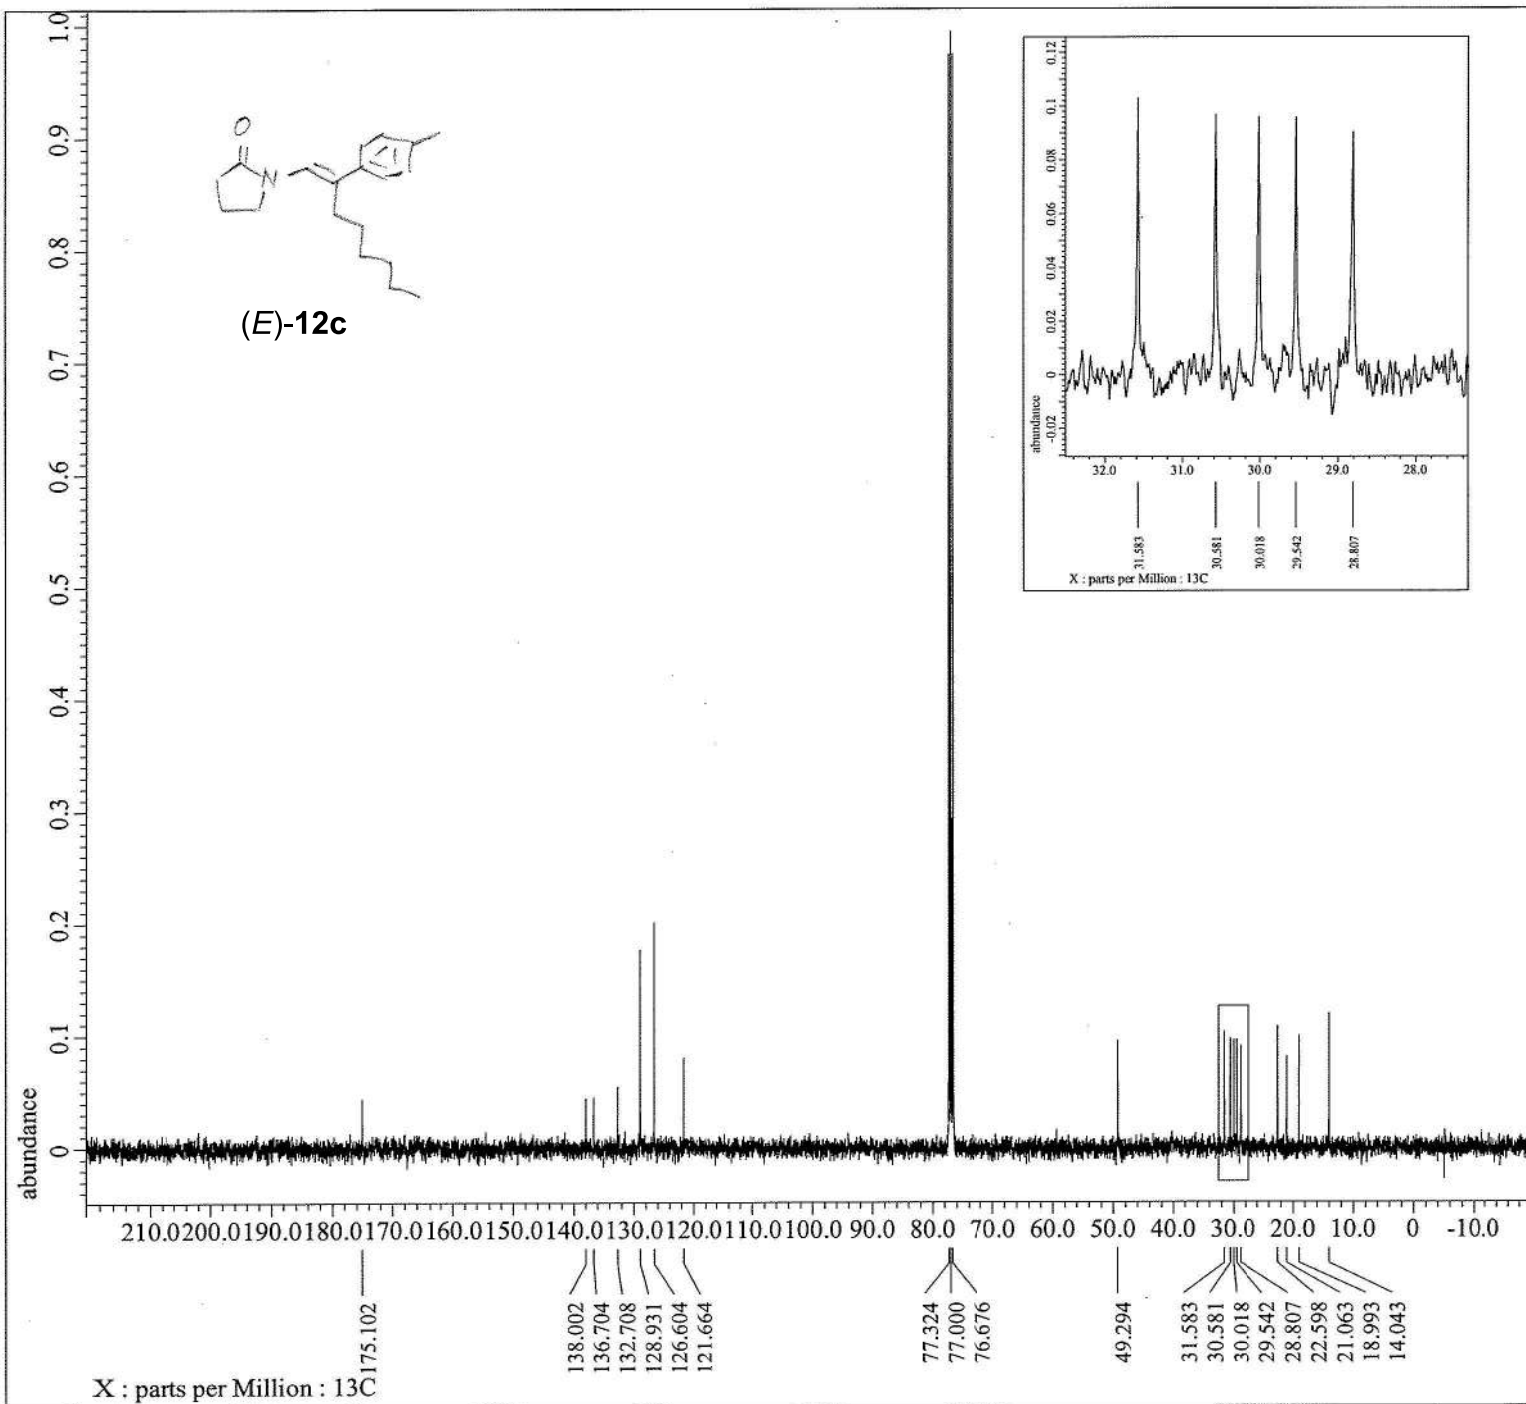

```

---- PROCESSING PARAMETERS ----
dc_balance( 0, FALSE )
sexp( 2.0[Hz], 0.0[s] )
trapezoid3( 0[%], 80[%], 100[%] )
zerofill( 1 )
fft( 1, TRUE, TRUE )
machinephase
ppm

```

以下に由来: KRY-145 pure C-1.jdf

```

Filename      = KRY-145 pure C-2.jdf
Author       = element
Experiment   = single_pulse_dec
Sample Id    = S#599077
Solvent      = CHLOROFORM-D
Actual_Start Time = 2-JUL-2021 23:18:23
Revision_Time = 4-FEB-2022 10:43:02

```

```

Comment      = single pulse decoupled ga
Data_Format  = 1D COMPLEX
Dim_Size     = 26214
X_Domain     = 13C
Dim_Title    = 13C
Dim_Units    = [ppm]
Dimensions   = X
Site         = ECS 400
Spectrometer = JNM-ECS400

```

```

Field_Strength = 9.20197068[T] (390[MHz])
X_Acq_Duration = 1.06430464[s]
X_Domain       = 13C
X_Freq         = 98.51479726 [MHz]
X_Offset       = 100 [ppm]
X_Points       = 32768
X_Prescans     = 4
X_Resolution   = 0.93958061 [Hz]
X_Sweep        = 30.78817734 [kHz]
Irr_Domain     = 1H
Irr_Freq       = 391.78655441 [MHz]
Irr_Offset     = 5 [ppm]
Clipped        = FALSE
Scans          = 200
Total_Scans    = 200

```

```

Relaxation_Delay = 2 [s]
Recvr_Gain       = 60
Temp_Get         = 20.1 [dC]
X_90_Width       = 8.7 [us]
X_Acq_Time       = 1.06430464 [s]
X_Angle          = 30 [deg]
X_Atn            = 4.9 [dB]
X_Pulse          = 2.9 [us]
Irr_Atn_Dec      = 22.45 [dB]
Irr_Atn_Noise   = 22.45 [dB]
Irr_Noise        = WALTZ
Decoupling       = TRUE
Initial_Wait     = 1 [s]
Noe              = TRUE
Noe_Time         = 2 [s]
Repetition_Time  = 3.06430464 [s]

```



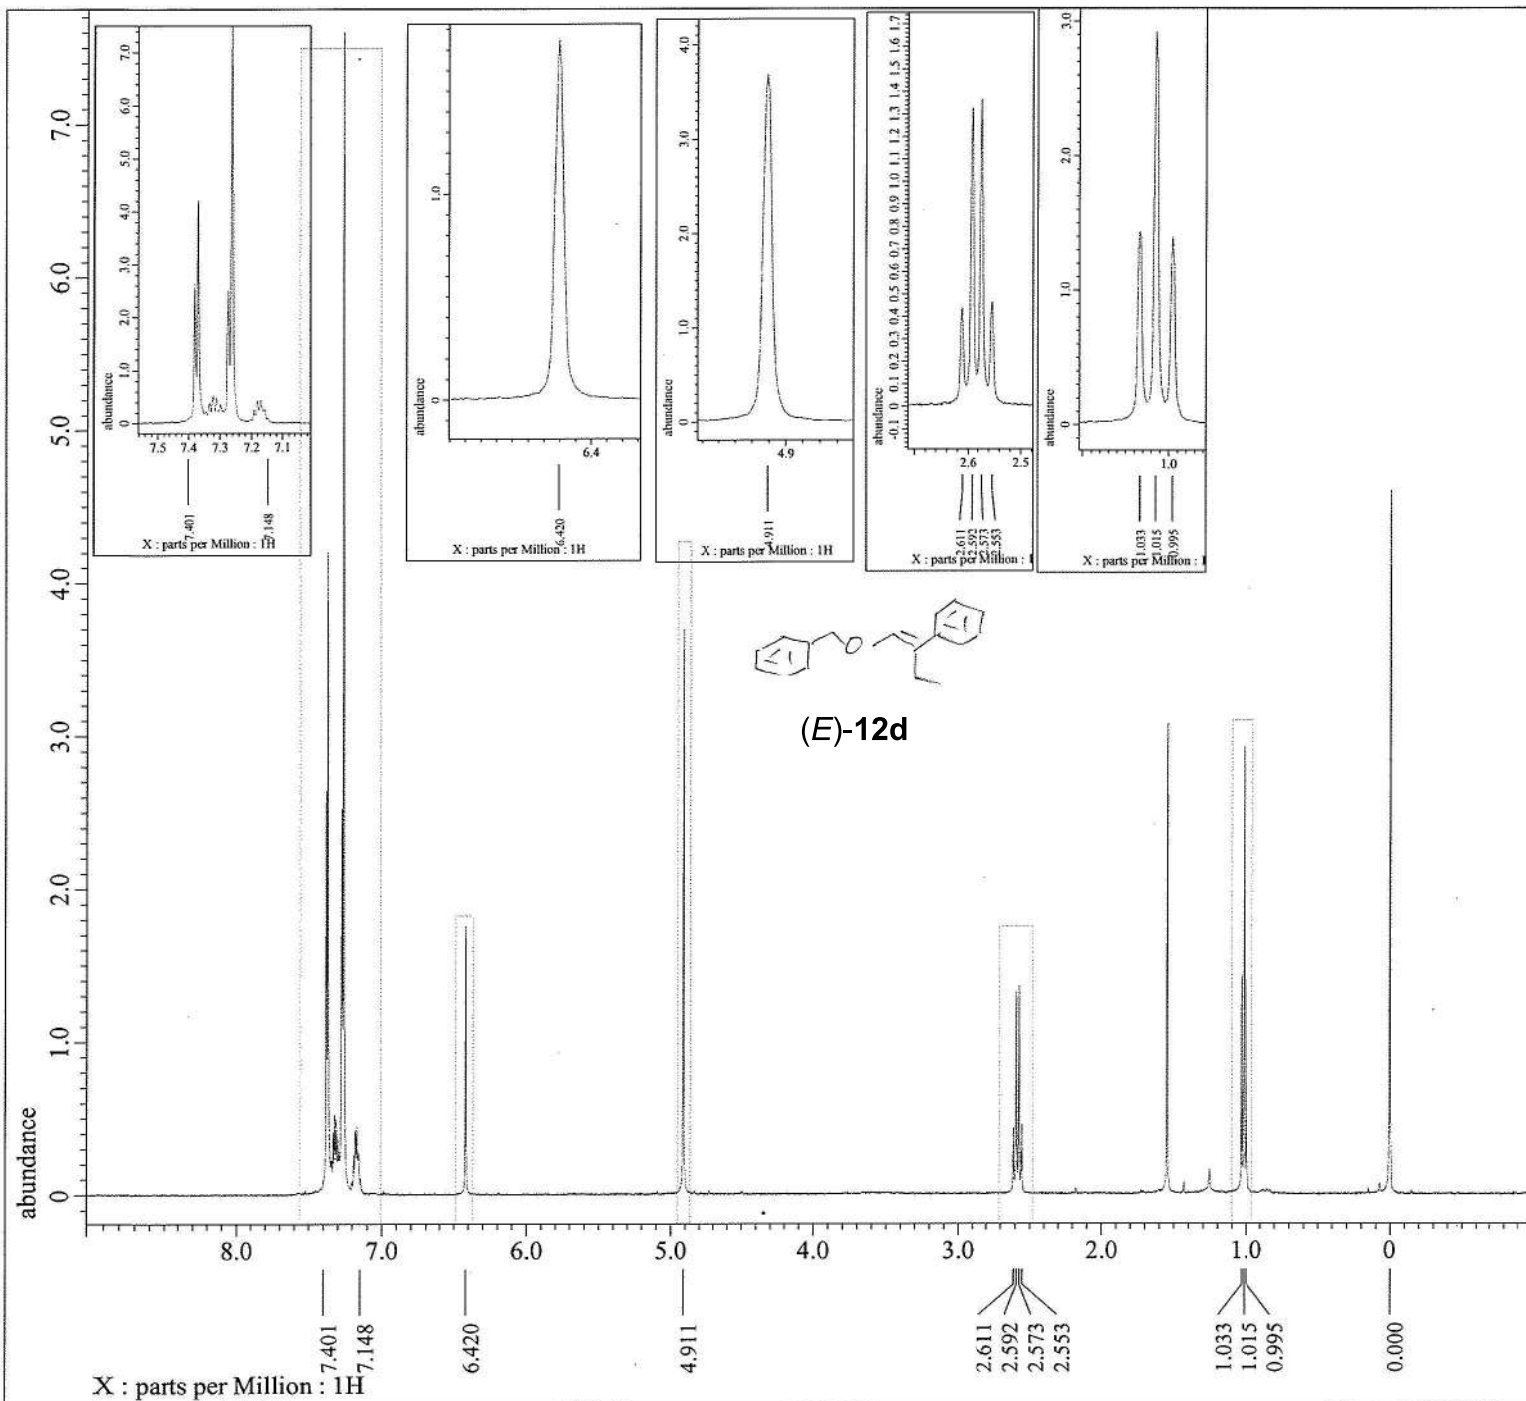

```

---- PROCESSING PARAMETERS ----
dc_balance( 0, FALSE )
sexp( 0.2[Hz], 0.0[s] )
trapezoid3( 0[%], 80[%], 100[%] )
zeroFill( 1 )
fft( 1, TRUE, TRUE )
machinephase
ppm

```

以下に由来: KRY-144 pure-1.jdf

```

Filename      = KRY-144 pure-2.jdf
Author       = element
Experiment   = single_pulse.ex2
Sample_Id    = S#484859
Solvent      = CHLOROFORM-D
Actual_Start Time = 1-JUL-2021 20:08:04
Revision_Time = 30-OCT-2021 13:31:40

```

```

Comment      = single_pulse
Data Format   = 1D COMPLEX
Dim_Size     = 13107
X_Domain     = 1H
Dim_Title    = 1H
Dim_Units    = [ppm]
Dimensions   = X
Site         = ECS 400
Spectrometer = JNM-ECS400

```

```

Field Strength = 9.20197068[T] (390[MHz])
X_Acq_Duration = 2.228224[s]
X_Domain       = 1H
X_Freq        = 391.78655441[MHz]
X_Offset      = 5[ppm]
X_Points      = 16384
X_Prescans    = 1
X_Resolution  = 0.44878791[Hz]
X_Sweep       = 7.35294118[kHz]
Irr_Domain    = 1H
Irr_Freq      = 391.78655441[MHz]
Irr_Offset    = 5[ppm]
Tri_Domain    = 1H
Tri_Freq      = 391.78655441[MHz]
Tri_Offset    = 5[ppm]
Clipped       = FALSE
Scans         = 8
Total_Scans   = 8

```

```

Relaxation_Delay = 5[s]
Recvr_Gain       = 56
Temp_Get         = 20[dC]
X_90_Width      = 10.8[us]
X_Acq_Time      = 2.228224[s]
X_Angle         = 45[deg]
X_Atn           = 1.9[dB]
X_Pulse         = 5.4[us]
Irr_Mode        = Off
Tri_Mode        = Off
Dante_Presat    = FALSE
Initial_Wait    = 1[s]
Repetition_Time = 7.228224[s]

```

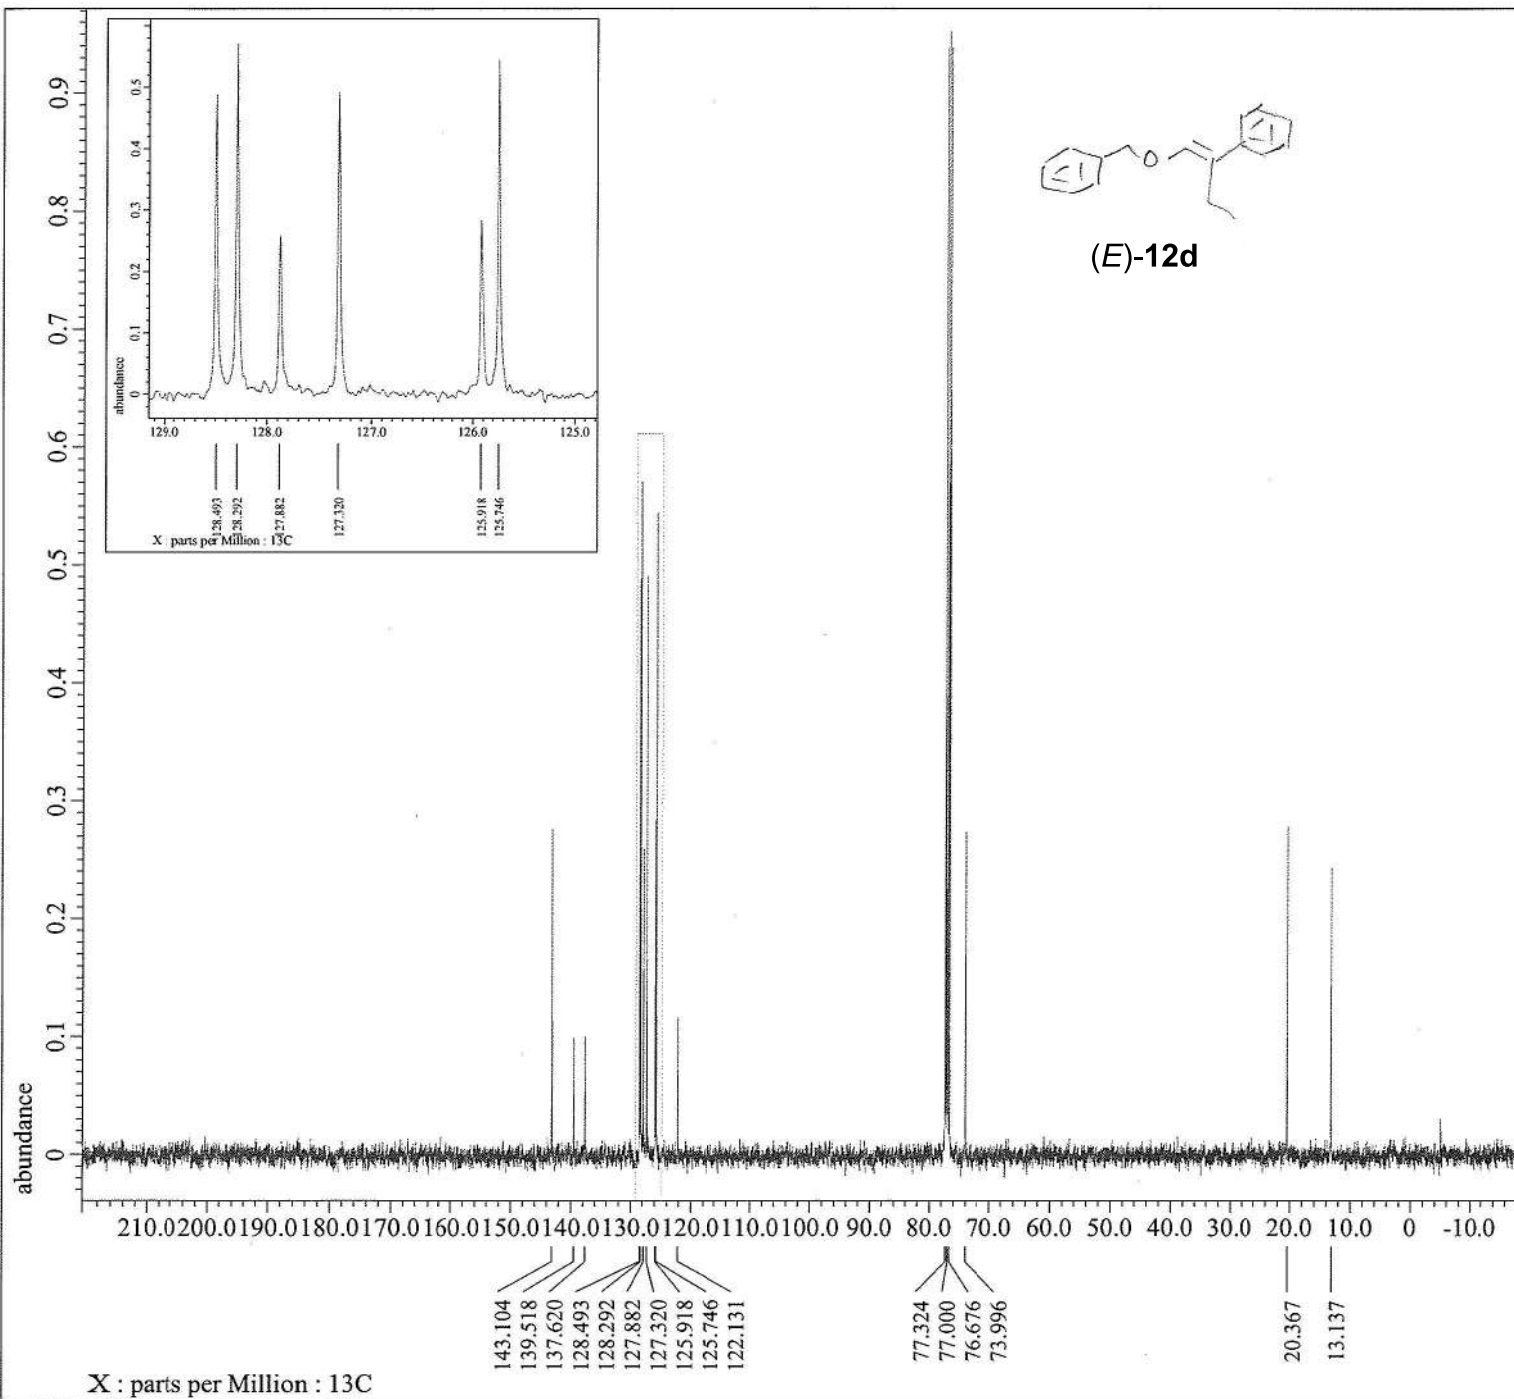

```

---- PROCESSING PARAMETERS ----
dc_balance( 0, FALSE )
sexp( 2.0[Hz], 0.0[s] )
trapezoid3( 0[%], 80[%], 100[%] )
zerofill( 1 )
fft( 1, TRUE, TRUE )
machinephase
ppm

```

以下に由来: KRY-144 pure C-1.jdf

```

Filename      = KRY-144 pure C-2.jdf
Author       = element
Experiment    = single_pulse_dec
Sample Id    = S#506891
Solvent      = CHLOROFORM-D
Actual_Start_Time = 3-JUL-2021 20:44:02
Revision_Time  = 30-OCT-2021 13:32:55

Comment      = single pulse decoupled ga
Data_Format  = 1D COMPLEX
Dim Size     = 26214
X_Domain     = 13C
Dim Title    = 13C
Dim Units    = [ppm]
Dimensions   = X
Site         = ECS 400
Spectrometer = JNM-ECS400

Field_Strength = 9.20197068[T] (390[MHz])
X_Acq_Duration = 1.06430464[s]
X_Domain       = 13C
X_Freq         = 98.51479726 [MHz]
X_Offset       = 100[ppm]
X Points       = 32768
X_Prescans     = 4
X_Resolution   = 0.93958061[Hz]
X_Sweep        = 30.78817734 [kHz]
Irr_Domain     = 1H
Irr_Freq       = 391.78655441 [MHz]
Irr_Offset     = 5[ppm]
Clipped        = FALSE
Scans          = 200
Total Scans    = 200

Relaxation_Delay = 2[s]
Recvr_Gain       = 60
Temp_Get         = 19.7[dC]
X_90_Width      = 8.7[us]
X_Acq_Time       = 1.06430464[s]
X_Angle         = 30[deg]
X_Atn           = 4.9[dB]
X_Pulse         = 2.9[us]
Irr_Atn_Dec     = 22.45[dB]
Irr_Atn_Noise   = 22.45[dB]
Irr_Noise       = WALTZ
Decoupling      = TRUE
Initial_Wait    = 1[s]
Noe              = TRUE
Noe_Time        = 2[s]
Repetition_Time = 3.06430464[s]

```

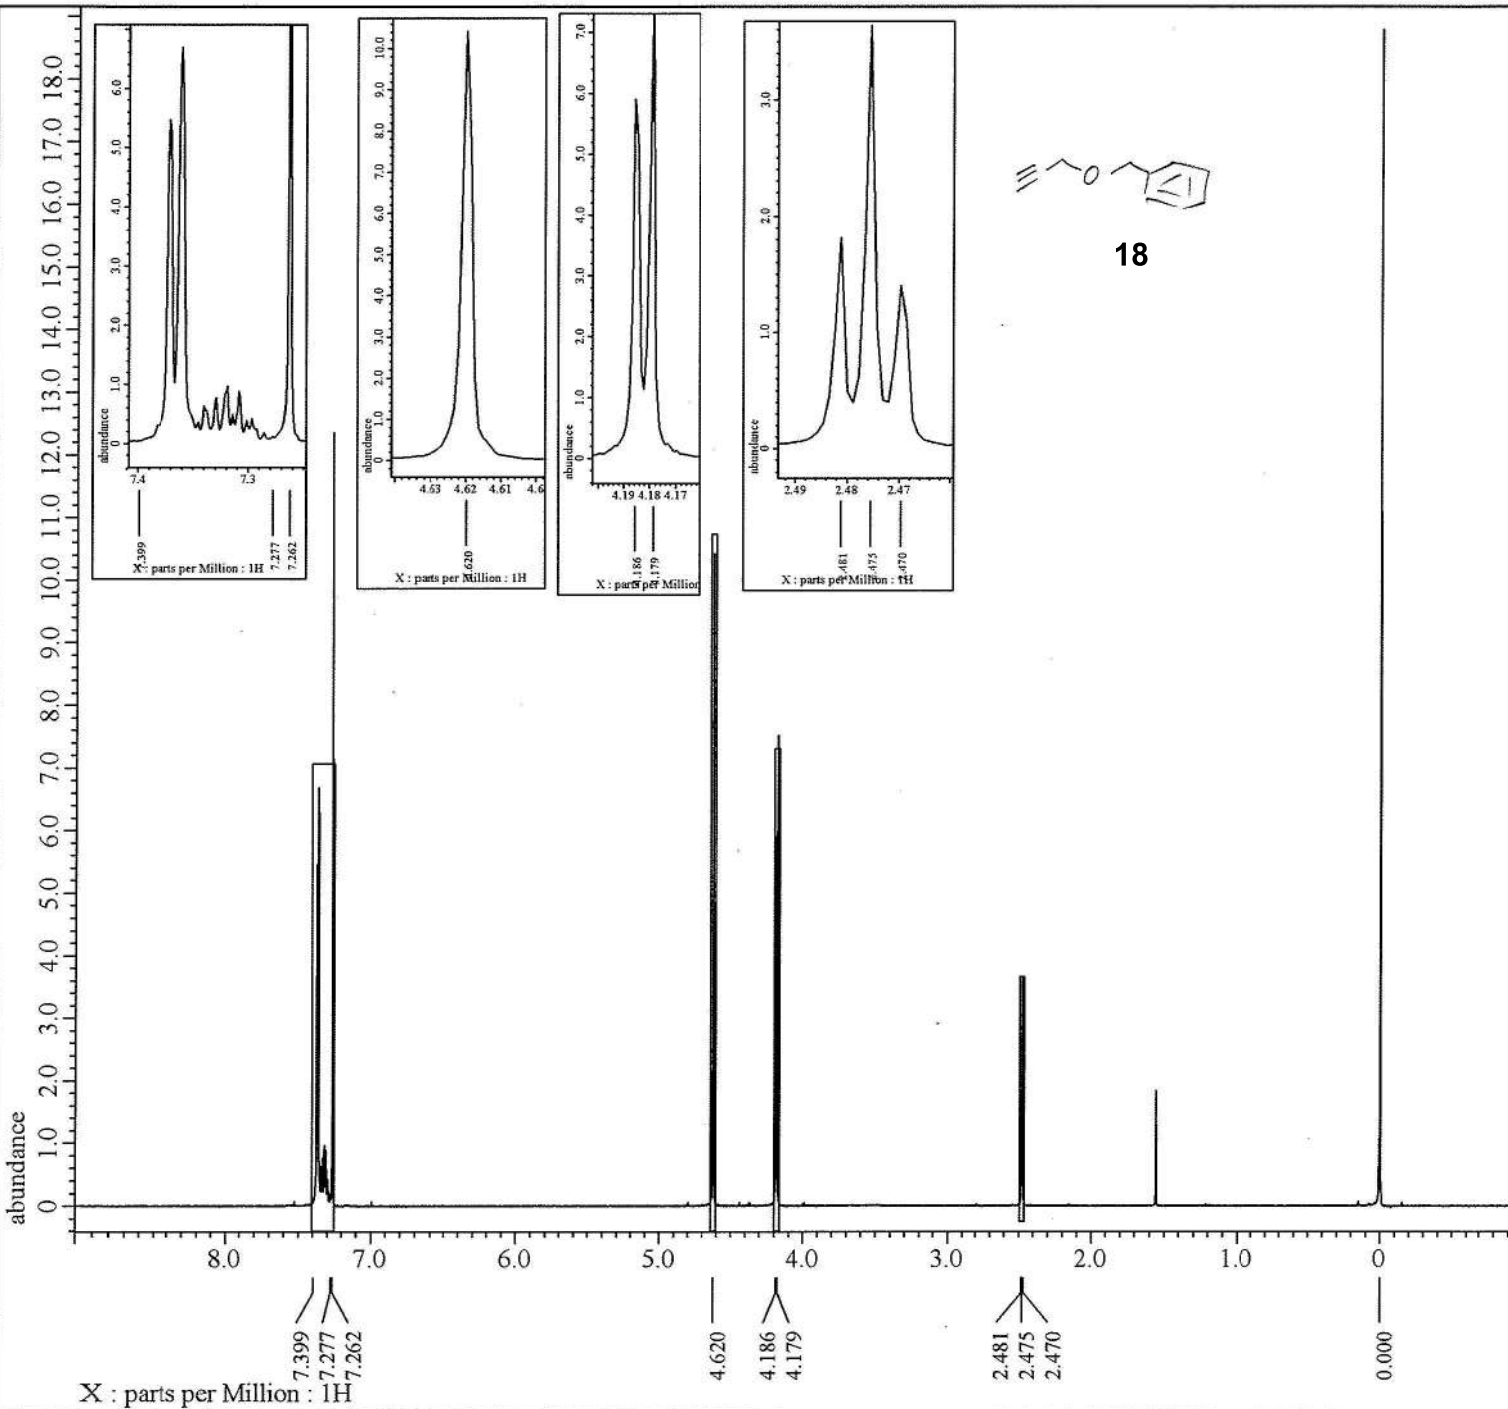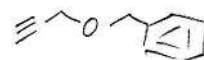

18

```

---- PROCESSING PARAMETERS ----
dc_balance( 0, FALSE )
sexp( 0.2[MHz], 0.0[s] )
trapezoid3( 0[%], 80[%], 100[%] )
zerofill( 1 )
fft( 1, TRUE, TRUE )
machinephase
ppm

```

Derived from: KRY-258-2 pure-1.jdf

```

Filename      = KRY-258-2 pure-2.jdf
Author       = element
Experiment   = single_pulse.ex2
Sample Id    = #623936
Solvent      = CHLOROFORM-D
Actual_Start Time = 20-FEB-2022 00:07:46
Revision_Time = 9-DEC-2022 15:49:01

```

```

Comment      = single_pulse
Data Format   = 1D COMPLEX
Dim Size     = 13107
X_Domain     = 1H
Dim Title    = 1H
Dim Units    = [ppm]
Dimensions   = X
Site         = ECS 400
Spectrometer = JNM-ECS400

```

```

Field Strength = 9.20197068[T] (390[MHz])
X_Acq_Duration = 2.228224[s]
X_Domain       = 1H
X_Freq         = 391.78655441[MHz]
X_Offset       = 5[ppm]
X_Points       = 16384
X_Prescans     = 1
X_Resolution   = 0.44878791[Hz]
X_Sweep        = 7.35294118[kHz]
Irr_Domain     = 1H
Irr_Freq       = 391.78655441[MHz]
Irr_Offset     = 5[ppm]
Tri_Domain     = 1H
Tri_Freq       = 391.78655441[MHz]
Tri_Offset     = 5[ppm]
Clipped        = FALSE
Scans          = 8
Total_Scans    = 8

```

```

Relaxation_Delay = 5[s]
Recvr_Gain       = 56
Temp_Get         = 16.6[dC]
X_90_Width       = 10.8[us]
X_Acq_Time       = 2.228224[s]
X_Angle          = 45[deg]
X_Atn            = 1.9[dB]
X_Pulse          = 5.4[us]
Irr_Mode         = Off
Tri_Mode         = Off
Dante_Presat     = FALSE
Initial_Wait     = 1[s]
Repetition_Time  = 7.228224[s]

```

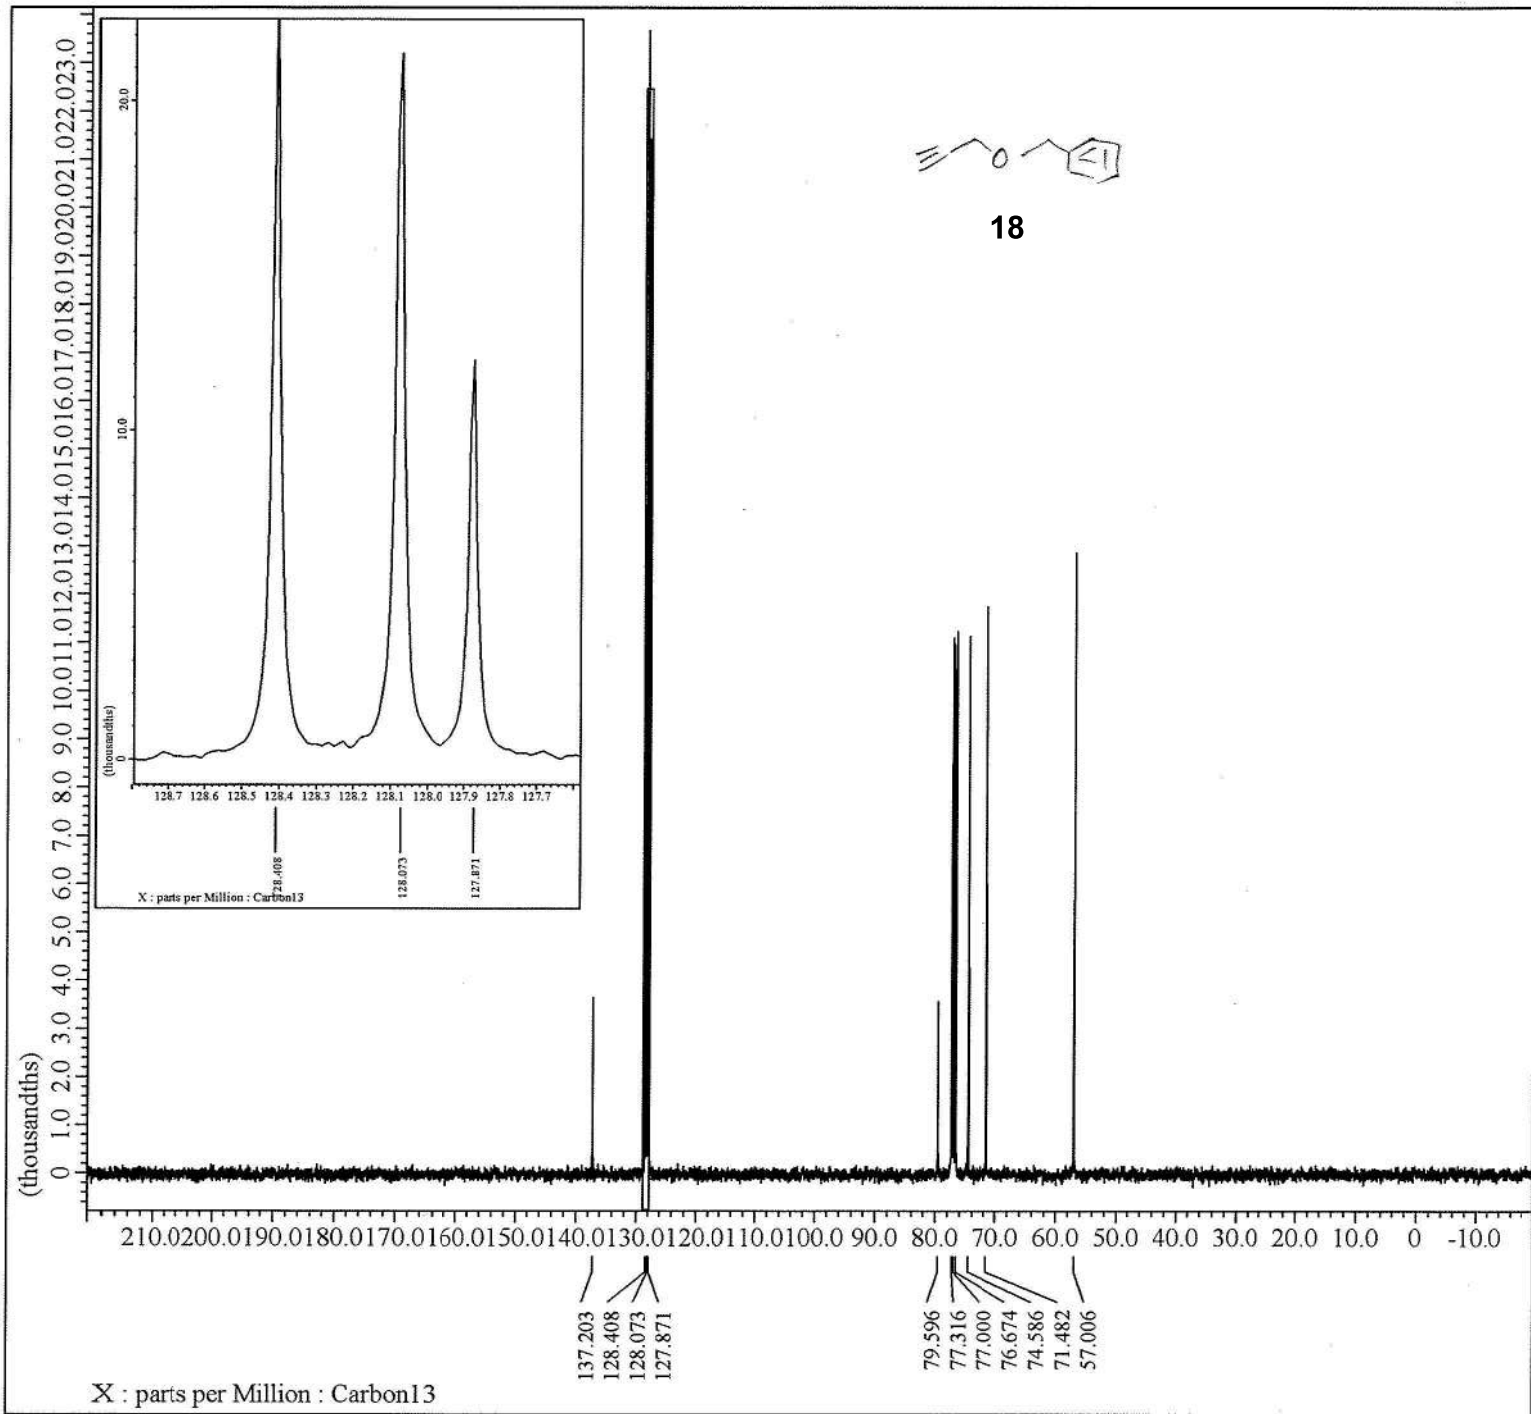

```

---- PROCESSING PARAMETERS ----
sexp( 2.0[Hz], 0.0[s] )
trapezoid( 0[%], 0[%], 80[%], 100[%] )
zerofill( 1 )
fft( 1, TRUE, TRUE )
machinephase
ppm
Derived from: KRY-258 pure_Carbon-1-1.jdf

```

```

Filename           = KRY-258 pure_Carbo
Author             = element
Experiment         = carbon_auto.jxp
Sample Id         = KRY-258 pure
Solvent           = CHLOROFORM-D
Actual Start Time = 23-JUL-2022 14:33:
Revision Time     = 9-DEC-2022 15:49:

Comment           = single pulse decou
Data Format       = 1D COMPLEX
Dim Size         = 26214
X_Domain        = Carbon13
Dim Title       = Carbon13
Dim Units       = [ppm]
Dimensions      = X
Spectrometer    = DELTA2_NMR

```

```

Field Strength    = 9.2982153[T] (400[
X_Acq_Duration   = 1.048576[s]
X_Domain        = Carbon13
X_Freq          = 99.54517646[MHz]
X_Offset        = 100[ppm]
X_Points        = 32768
X_Prescans      = 4
X_Resolution    = 0.95367432[Hz]
X_Sweep         = 31.25[kHz]
X_Sweep_Clipped = 25[kHz]
Irr_Domain      = Proton
Irr_Freq       = 395.88430144[MHz]
Irr_Offset     = 5[ppm]
Blanking       = 5[us]
Clipped        = TRUE
Scans          = 200
Total_Scans    = 200

```

```

Relaxation_Delay = 2[s]
Recvr_Gain       = 50
Temp_Get        = 20.2[dC]
X_90_Width     = 9.65[us]
X_Acq_Time     = 1.048576[s]
X_Angle        = 30[deg]
X_Atn          = 8[dB]
X_Pulse        = 3.21666667[us]
Irr_Atn_Dec    = 25.059[dB]
Irr_Atn_Dec_Calc = 25.059[dB]
Irr_Atn_Dec_Default_Calc = 25.059[dB]
Irr_Atn_Noise  = 25.059[dB]
Irr_Dec_Bandwidth_Hz = 4.7826087[kHz]
Irr_Dec_Bandwidth_Fpm = 12.08082432[ppm]
Irr_Dec_Freq   = 395.88430144[MHz]
Irr_Dec_Merit_Factor = 2.2
Irr_Decoupling = TRUE
Irr_Noise     = TRUE
Irr_Noise     = WALTZ
Irr_Offset_Default = 5[ppm]

```

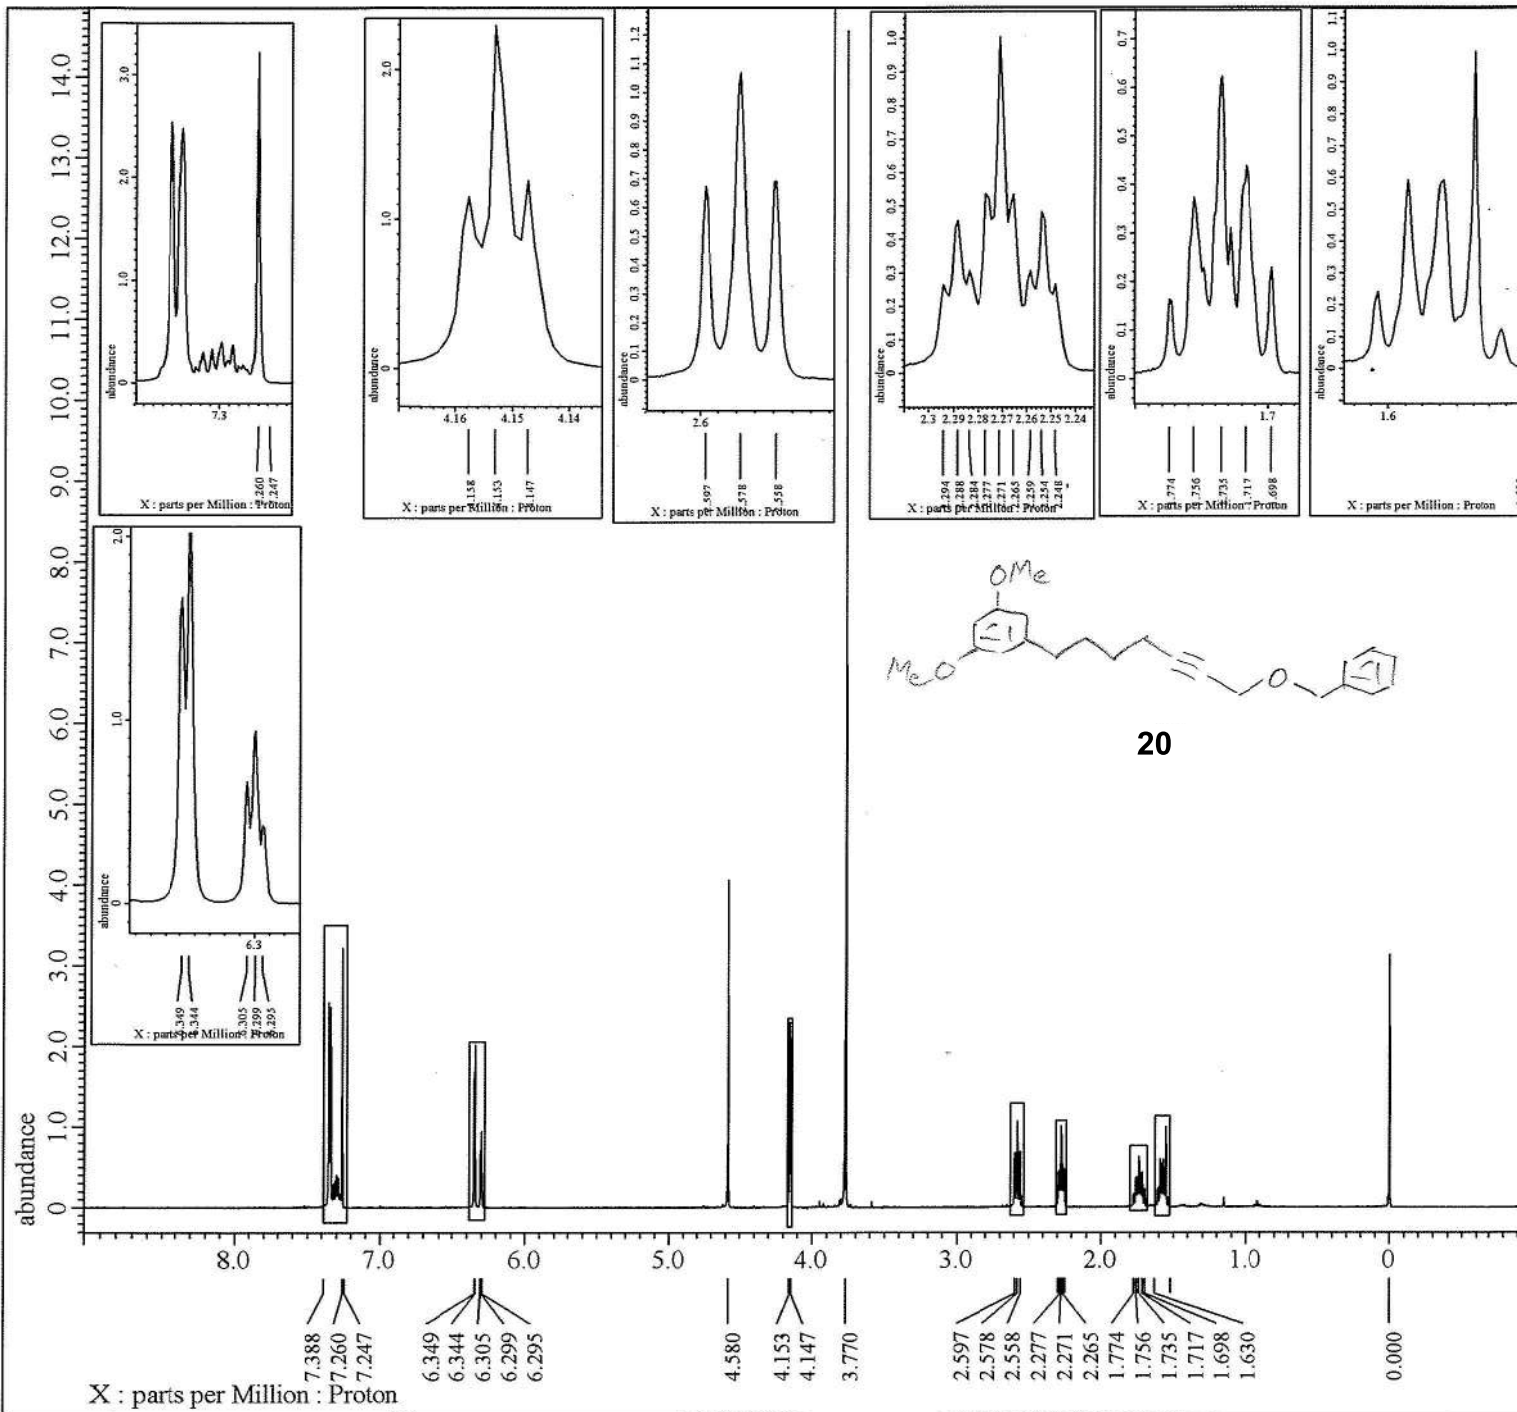

```

---- PROCESSING PARAMETERS ----
dc_balance( 0, FALSE )
sexp( 0.2[Hz], 0.0[s] )
trapezoid( 0[%], 0[%], 80[%], 100[%] )
zerofill( 1 )
fft( 1, TRUE, TRUE )
machinephase
ppm
Derived from: OZW-1774-pure_Proton-1-1.jdf

```

```

Filename      = OZW-1774-pure_Proton-1-2.
Author       = element
Experiment   = proton.jxp
Sample Id    = OZW-1774-pure
Solvent      = CHLOROFORM-D
Actual Start Time = 10-MAR-2022 14:52:35
Revision Time  = 12-DEC-2022 16:00:05

```

```

Comment      = single_pulse
Data Format   = 1D_COMPLEX
Dim Size     = 13107
X Domain     = Proton
Dim Title    = Proton
Dim Units    = [ppm]
Dimensions   = X
Spectrometer = DELTA2_NMR

```

```

Field Strength = 9.4073814[T] (400[MHz])
X_Acq_Duration = 2.18103808[s]
X_Domain       = 1H
X_Freq         = 400.53219825[MHz]
X_Offset       = 5[ppm]
X_Points       = 16384
X_Prescans     = 1
X_Resolution   = 0.45849727[Hz]
X_Sweep        = 7.51201923[kHz]
X_Sweep_Clipped = 6.00961538[kHz]
Irr_Domain     = Proton
Irr_Freq       = 400.53219825[MHz]
Irr_Offset     = 5[ppm]
Tri_Domain     = Proton
Tri_Freq       = 400.53219825[MHz]
Tri_Offset     = 5[ppm]
Clipped        = FALSE
Scans          = 8
Total_Scans    = 8

```

```

Relaxation_Delay = 5[s]
Recvr_Gain       = 44
Temp_Get         = 18.8[dC]
X_90_Width      = 6[us]
X_Acq_Time       = 2.18103808[s]
X_Angle         = 45[deg]
X_Atn           = 0.8[dB]
X_Pulse         = 3[us]
Irr_Mode        = Off
Tri_Mode        = Off
Dante_Presat    = FALSE
Initial_Wait    = 1[s]
Repetition_Time = 7.18103808[s]

```

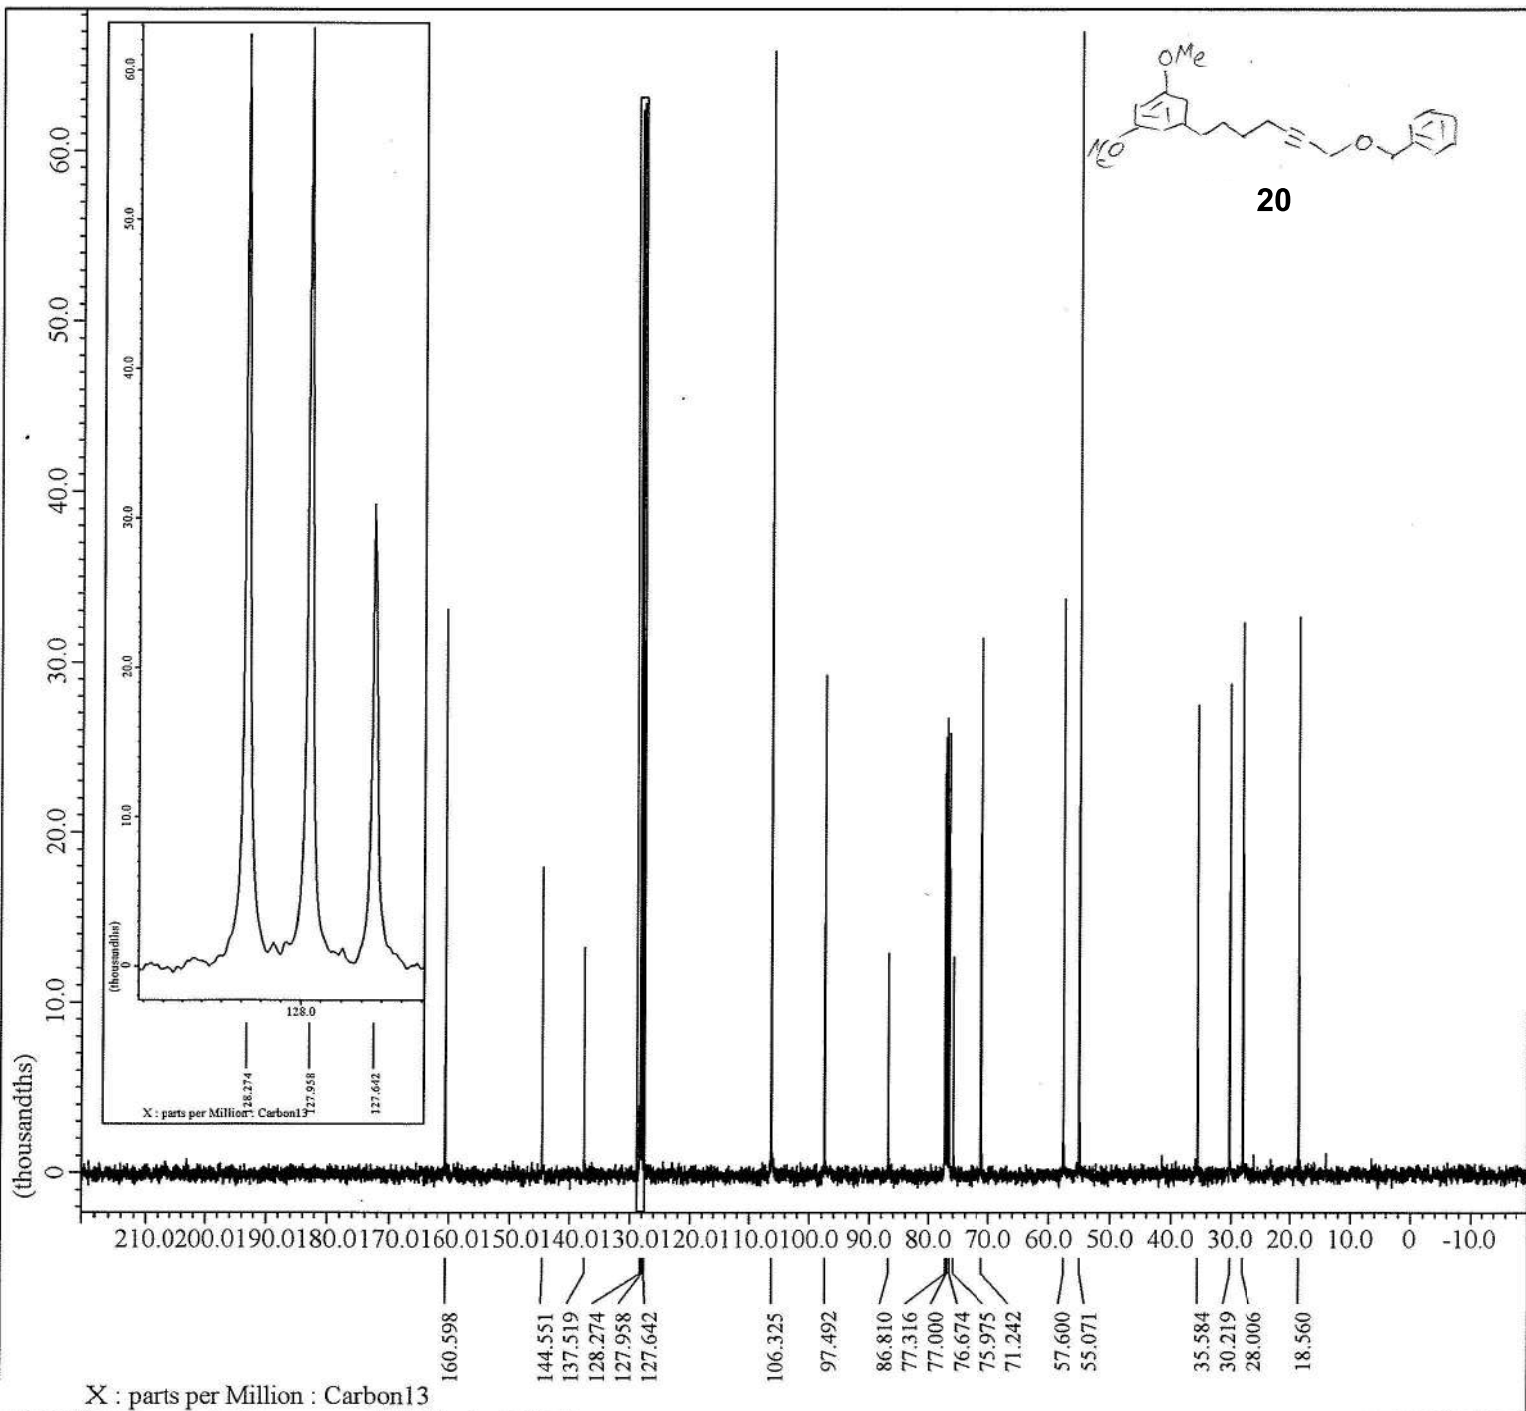

```

---- PROCESSING PARAMETERS ----
sexp( 2.0[Hz], 0.0[s] )
trapezoid( 0[%], 0[%], 80[%], 100[%] )
zerofill( 1 )
fft( 1, TRUE, TRUE )
machinephase
ppm

Derived from: OZW-1774-pure_Carbon-1-1.jdf

Filename           = OZW-1774-pure_Carb
Author             = element
Experiment         = carbon_auto.jpg
Sample_Id         = OZW-1774-pure
Solvent           = CHLOROFORM-D
Actual_Start_Time = 11-MAR-2022 15:18:
Revision_Time     = 9-DEC-2022 16:00:

Comment           = single pulse decou
Data_Format       = 1D COMPLEX
Dim_Size          = 26214
X_Domain          = Carbon13
Dim_Title         = Carbon13
Dim_Units         = [ppm]
Dimensions        = X
Spectrometer      = DELTA2_NMR

Field_strength    = 9.2982153[T] (400[
X_Acq_Duration    = 1.048576[s]
X_Domain          = Carbon13
X_Freq            = 99.54517646[MHz]
X_Offset          = 100[ppm]
X_Points          = 32768
X_Prescans        = 4
X_Resolution      = 0.95367432[Hz]
X_Sweep           = 31.25[kHz]
X_Sweep_Clipped  = 25[kHz]
Irr_Domain        = Proton
Irr_Freq          = 395.88430144[MHz]
Irr_Offset        = 5[ppm]
Blanking          = 5[us]
Clipped           = TRUE
Scans             = 60
Total_Scans       = 60

Relaxation_Delay  = 2[s]
Recvr_Gain        = 56
Temp_Get          = 18.5[dc]
X_90_Width        = 9.65[us]
X_Acq_Time        = 1.048576[s]
X_Angle           = 30[deg]
X_Atn             = 8[dB]
X_Pulse           = 3.21666667[us]
Irr_Atn_Dec       = 25.059[dB]
Irr_Atn_Dec_Calc = 25.059[dB]
Irr_Atn_Dec_Default_Calc = 25.059[dB]
Irr_Atn_Noise     = 25.059[dB]
Irr_Dec_Bandwidth_Hz = 4.7826087[kHz]
Irr_Dec_Bandwidth_Ppm = 12.08082432[ppm]
Irr_Dec_Freq      = 395.88430144[MHz]
Irr_Dec_Merit_Factor = 2.2
Irr_Decoupling    = TRUE
Irr_Noise         = TRUE
Irr_Noise         = WALTZ
Irr_Offset_Default = 5[ppm]

```

X : parts per Million : Carbon13

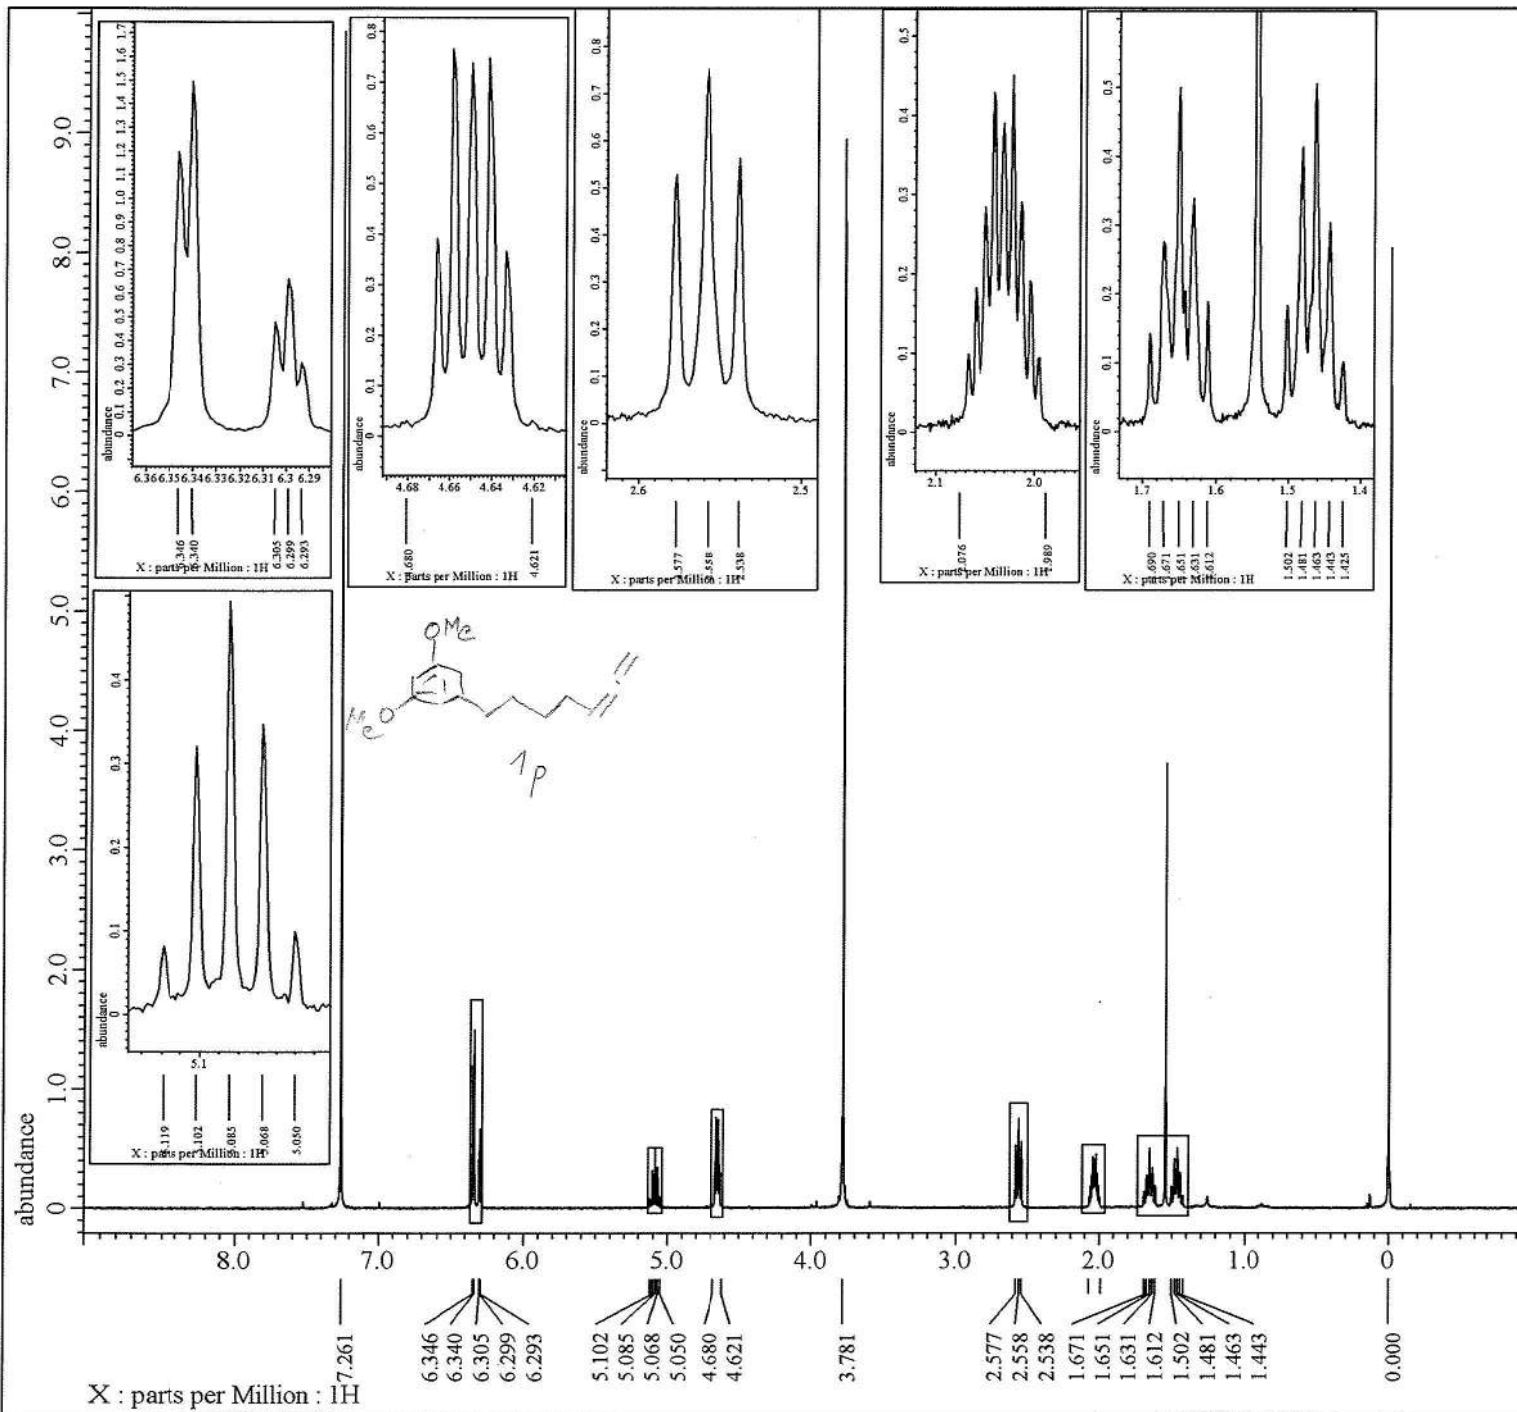

```

---- PROCESSING PARAMETERS ----
dc_balance( 0, FALSE )
sexp( 0.2[MHz], 0.0[s] )
trapezoid3( 0[%], 80[%], 100[%] )
zerofill( 1 )
fft( 1, TRUE, TRUE )
machinephase
ppm

Derived from: KRY-308(2) pure-1.jdf

Filename      = KRY-308(2) pure-2.jdf
Author        = element
Experiment    = single_pulse.ex2
Sample_Id     = S#466811
Solvent       = CHLOROFORM-D
Actual_Start_Time = 28-JUL-2022 19:44:43
Revision_Time  = 12-DEC-2022 17:01:51

Comment       = single_pulse
Data_Format   = 1D COMPLEX
Dim_Size      = 13107
X_Domain      = 1H
Dim_Title     = 1H
Dim_Units     = [ppm]
Dimensions    = X
Site          = ECS 400
Spectrometer  = JNM-ECS400

Field_Strength = 9.20197068[T] (390[MHz])
X_Acq_Duration = 2.228224[s]
X_Domain       = 1H
X_Freq         = 391.78655441[MHz]
X_Offset       = 5[ppm]
X_Points       = 16384
X_Prescans     = 1
X_Resolution   = 0.44878791[Hz]
X_Sweep        = 7.35294118[kHz]
Irr_Domain     = 1H
Irr_Freq       = 391.78655441[MHz]
Irr_Offset     = 5[ppm]
Tri_Domain     = 1H
Tri_Freq       = 391.78655441[MHz]
Tri_Offset     = 5[ppm]
Clipped        = FALSE
Scans          = 8
Total_Scans    = 8

Relaxation_Delay = 5[s]
Recvr_Gain       = 56
Temp_Get         = 21[dC]
X_90_Width       = 10.8[us]
X_Acq_Time       = 2.228224[s]
X_Angle          = 45[deg]
X_Atn            = 1.9[dB]
X_Pulse          = 5.4[us]
Irr_Mode         = Off
Tri_Mode         = Off
Dante_Preset    = FALSE
Initial_wait     = 1[s]
Repetition_Time  = 7.228224[s]
  
```

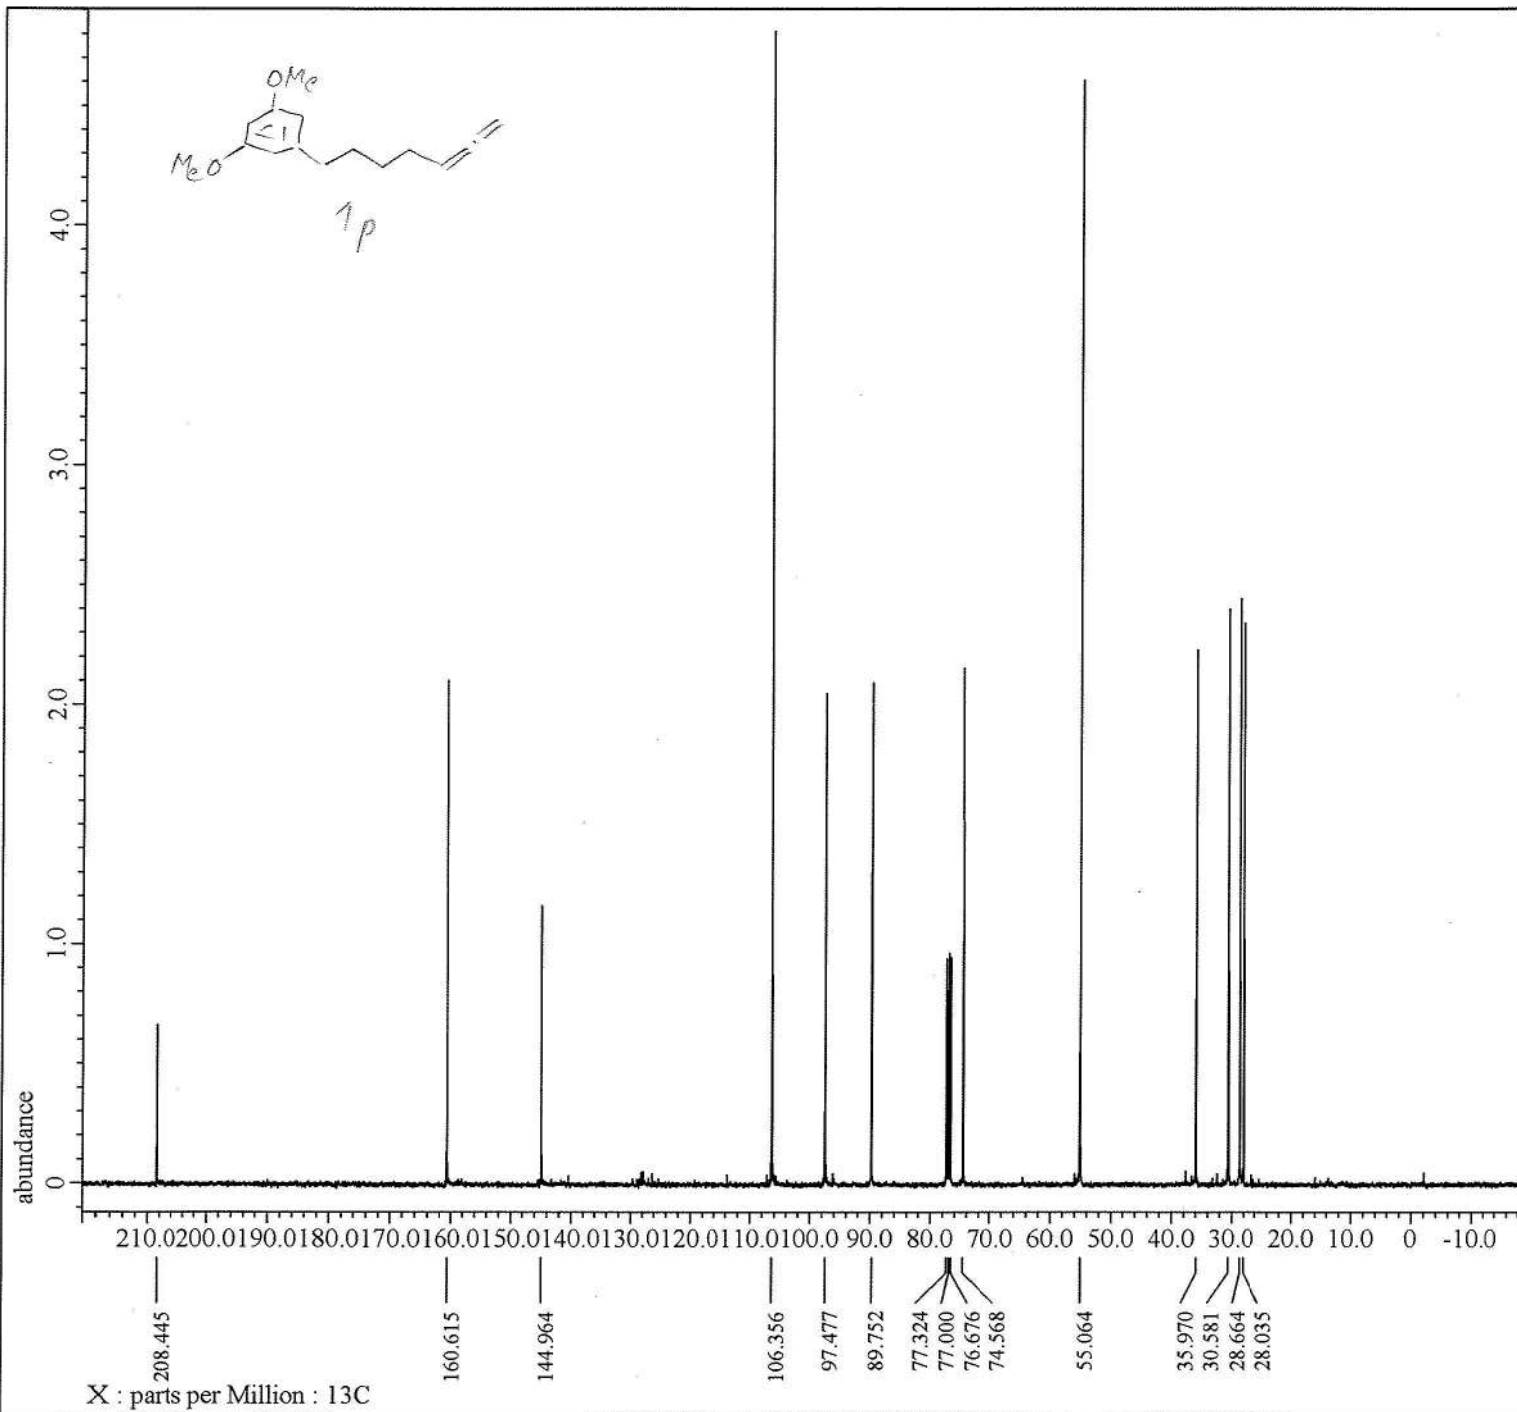

---- PROCESSING PARAMETERS ----  
 dc\_balance( 0, FALSE )  
 sexp( 2.0[Hz], 0.0[s] )  
 trapezoid3( 0[%], 80[%], 100[%] )  
 zerofill( 1 )  
 fft( 1, TRUE, TRUE )  
 machinephase  
 ppm  
 Derived from: KRY-308(2) pure C-1.jdf

Filename = KRY-308(2) pure C-2.jdf  
 Author = element  
 Experiment = single\_pulse\_dec  
 Sample\_Id = 1  
 Solvent = CHLOROFORM-D  
 Actual\_Start\_Time = 28-JUL-2022 20:00:38  
 Revision\_Time = 9-DEC-2022 16:08:38

Comment = single pulse decoupled ga  
 Data\_Format = 1D COMPLEX  
 Dim\_Size = 26214  
 X\_Domain = 13C  
 Dim\_Title = 13C  
 Dim\_Units = [ppm]  
 Dimensions = X  
 Site = ECS 400  
 Spectrometer = JNM-ECS400

Field\_Strength = 9.20197068[T] (390[MHz])  
 X\_Acq\_Duration = 1.06430464[s]  
 X\_Domain = 13C  
 X\_Freq = 98.51479726[MHz]  
 X\_Offset = 100[ppm]  
 X\_Points = 32768  
 X\_Prescans = 4  
 X\_Resolution = 0.93958061[Hz]  
 X\_Sweep = 30.78817734[kHz]  
 Irr\_Domain = 1H  
 Irr\_Freq = 391.78655441[MHz]  
 Irr\_Offset = 5[ppm]  
 Clipped = FALSE  
 Scans = 200  
 Total\_Scans = 200

Relaxation\_Delay = 2[s]  
 Recvr\_Gain = 60  
 Temp\_Get = 21.3[dC]  
 X\_90\_Width = 8.7[us]  
 X\_Acq\_Time = 1.06430464[s]  
 X\_Angle = 30[deg]  
 X\_Atn = 4.9[dB]  
 X\_Pulse = 2.9[us]  
 Irr\_Atn\_Dec = 22.45[dB]  
 Irr\_Atn\_Noise = 22.45[dB]  
 Irr\_Noise = WALTZ  
 Decoupling = TRUE  
 Initial\_Wait = 1[s]  
 Noe = TRUE  
 Noe\_Time = 2[s]  
 Repetition\_Time = 3.06430464[s]



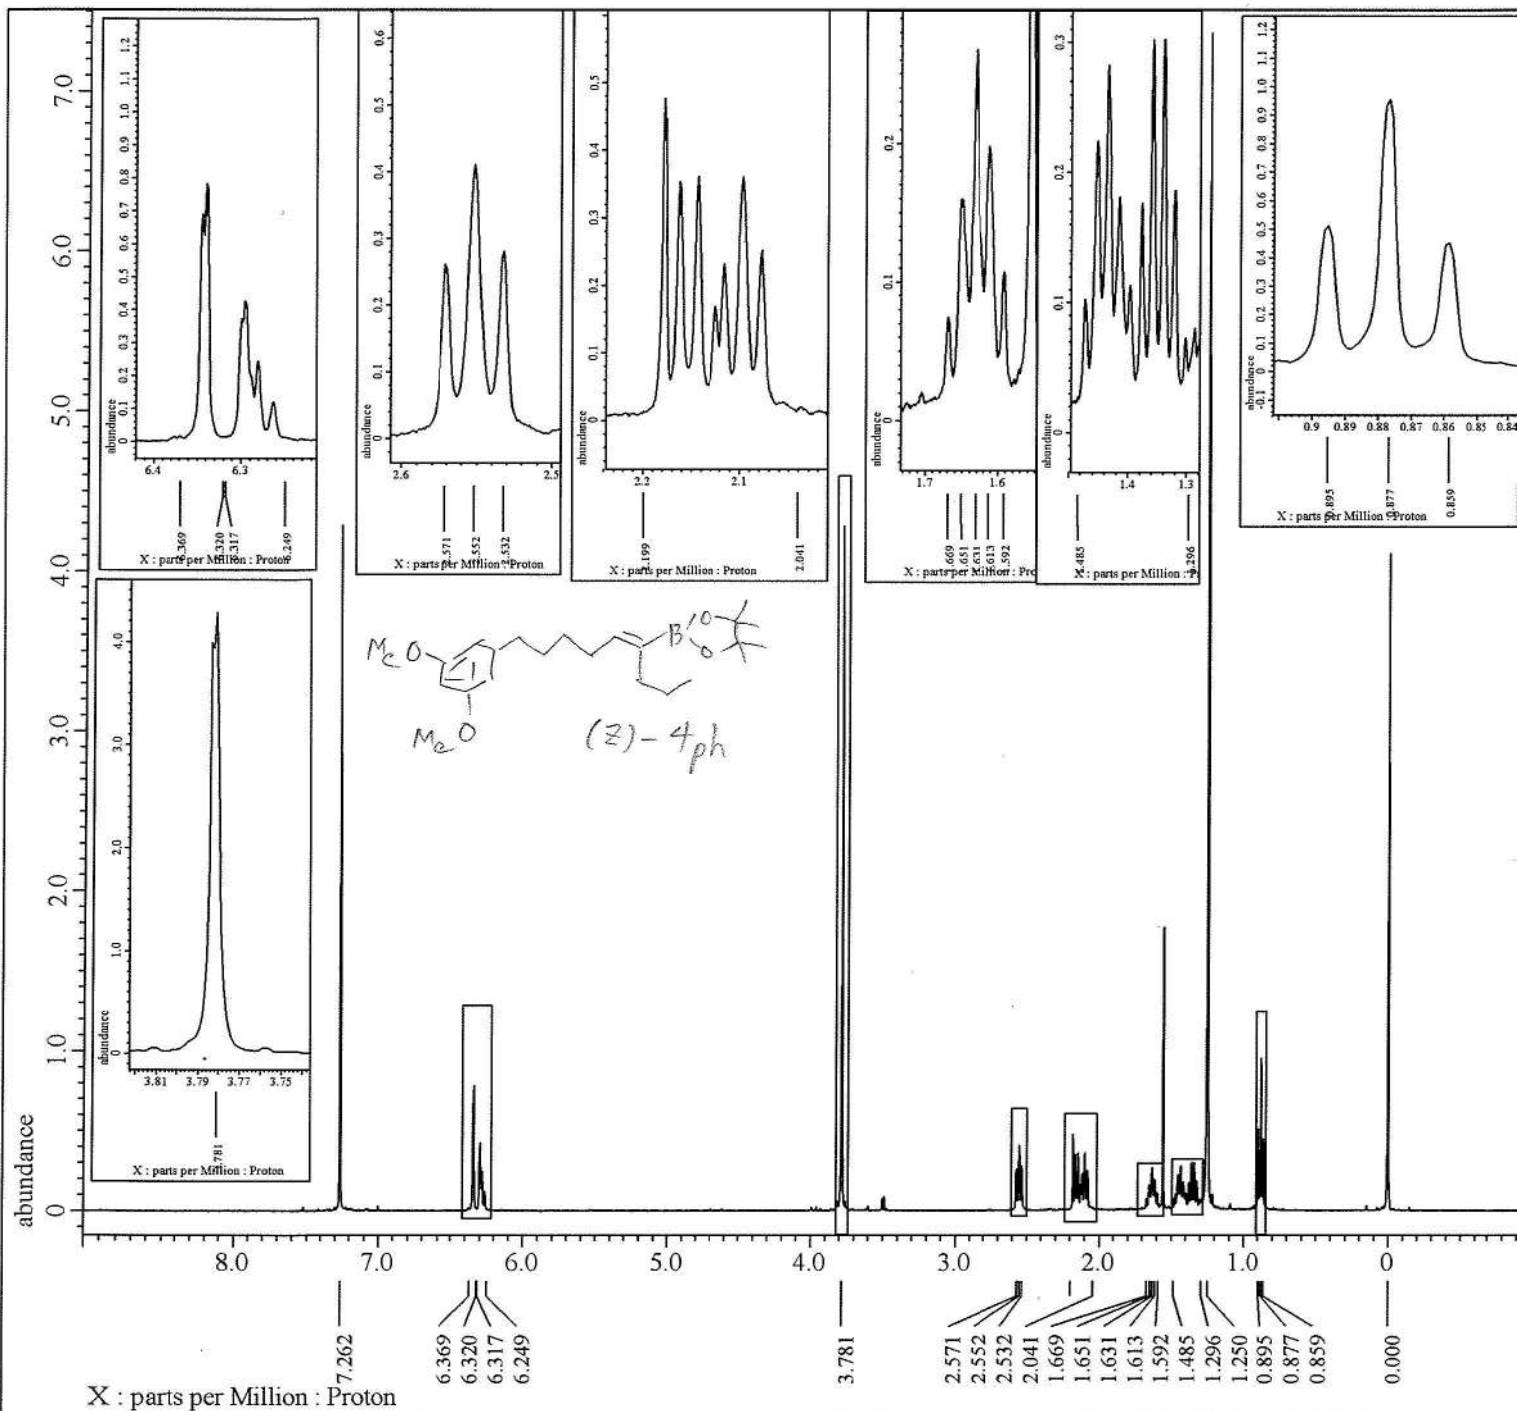

```

---- PROCESSING PARAMETERS ----
dc_balance( 0, FALSE )
sexp( 0.2[Hz], 0.0[s] )
trapezoid( 0[%], 0[%], 80[%], 100[%] )
zerofill( 1 )
fft( 1, TRUE, TRUE )
machinephase
ppm

Derived from: KRY-306 pure_Proton-1-1.jdf

Filename      = KRY-306 pure_Proton-1-2.j
Author       = element
Experiment   = proton.jxp
Sample Id    = KRY-306 pure
Solvent      = CHLOROFORM-D
Actual_Start_Time = 7-JUL-2022 11:28:58
Revision_Time   = 12-DEC-2022 17:23:48

Comment      = single_pulse
Data_Format   = 1D COMPLEX
Dim_Size     = 13107
X_Domain     = Proton
Dim_Title    = Proton
Dim_Units    = [ppm]
Dimensions   = X
Spectrometer = DELTA2_NMR

Field_Strength = 9.4073814[T] (400[MHz])
X_Acq_Duration = 2.18103808[s]
X_Domain      = 1H
X_Freq       = 400.53219825[MHz]
X_Offset     = 5[ppm]
X_Points     = 16384
X_Prescans   = 1
X_Resolution = 0.45849727[Hz]
X_Sweep     = 7.51201923[kHz]
X_Sweep_Clippped = 6.00961538[kHz]
Irr_Domain   = Proton
Irr_Freq     = 400.53219825[MHz]
Irr_Offset   = 5[ppm]
Tri_Domain   = Proton
Tri_Freq     = 400.53219825[MHz]
Tri_Offset   = 5[ppm]
Clipped     = FALSE
Scans       = 8
Total_Scans = 8

Relaxation_Delay = 5[s]
Recvr_Gain       = 48
Temp_Get        = 18.9[dC]
X_90_Width     = 6[us]
X_Acq_Time     = 2.18103808[s]
X_Angle        = 45[deg]
X_Atn          = 0.8[dB]
X_Pulse        = 3[us]
Irr_Mode       = Off
Tri_Mode       = Off
Dante_Presat   = FALSE
Initial_Wait   = 1[s]
Repetition_Time = 7.18103808[s]
  
```

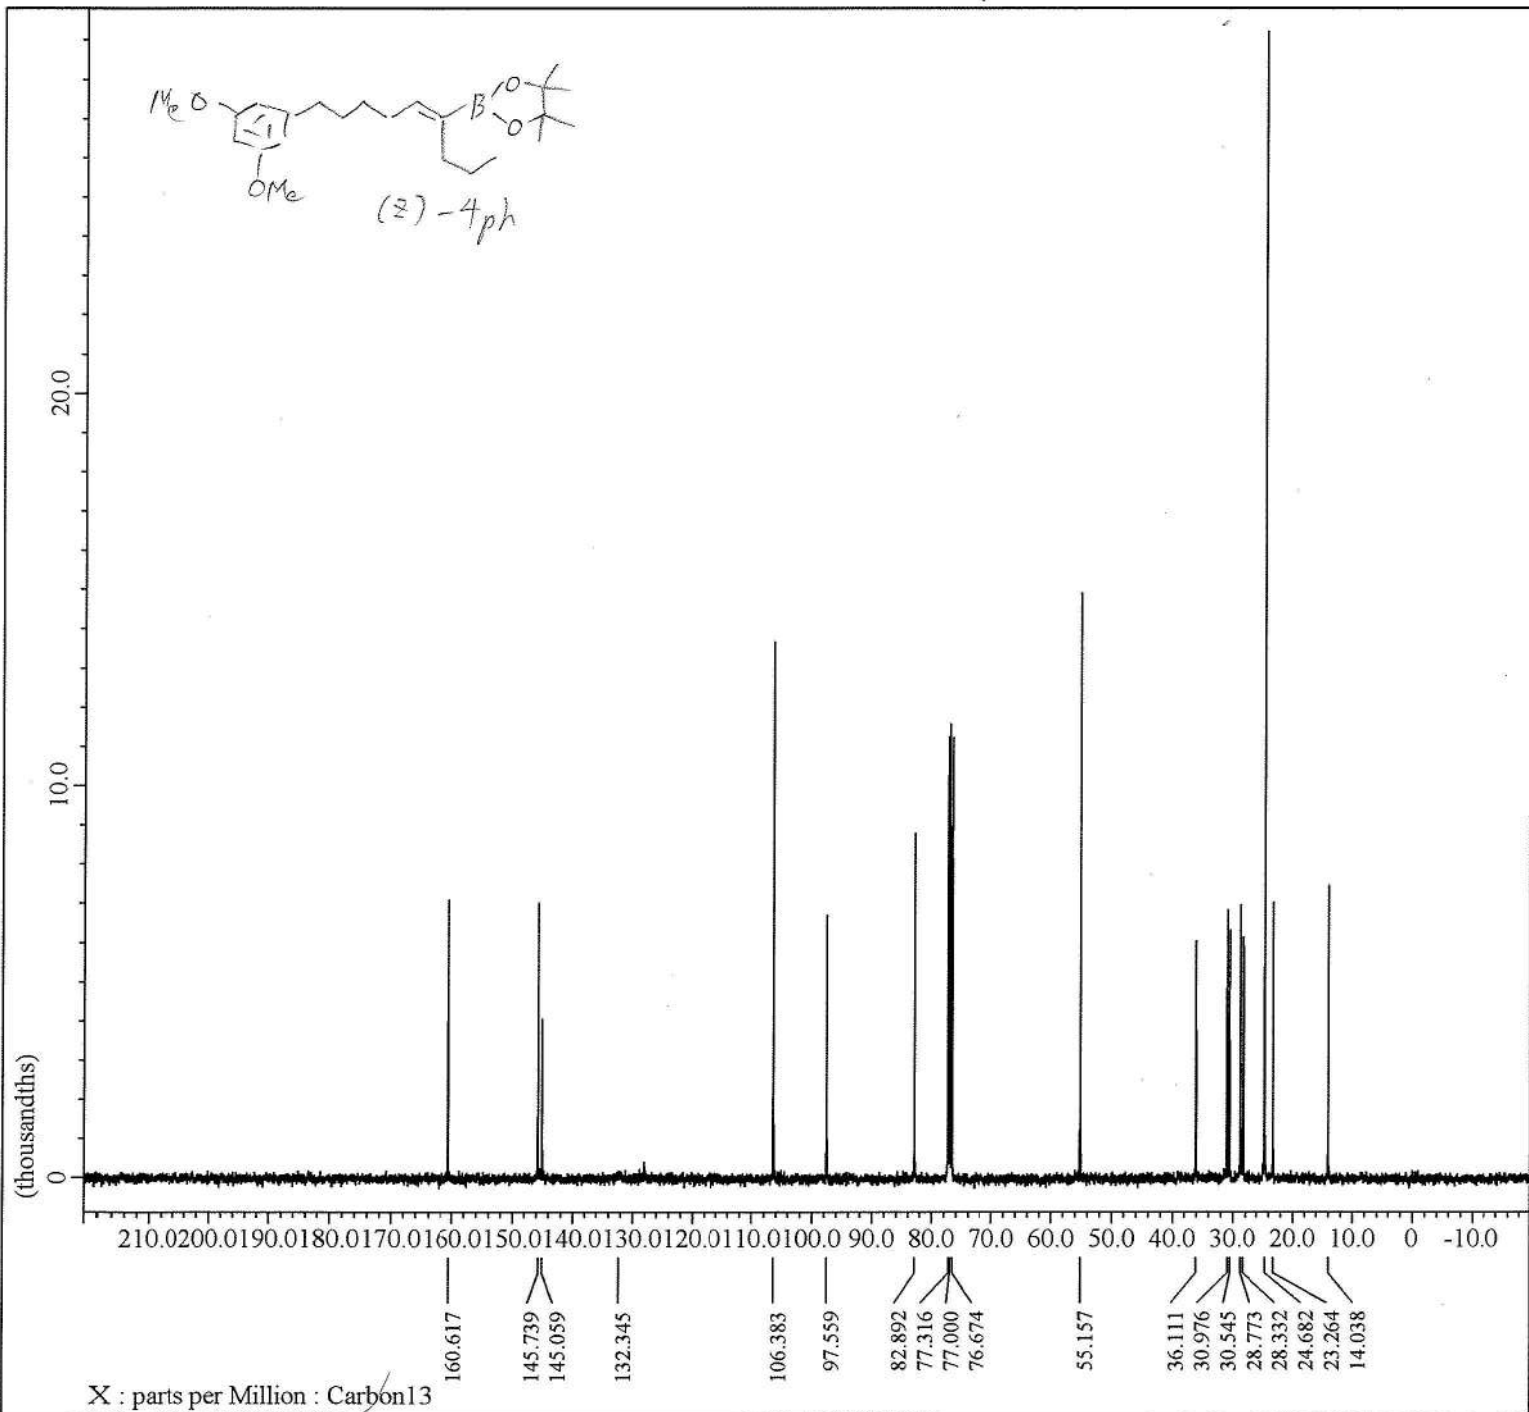

---- PROCESSING PARAMETERS ----  
 exp( 2.0[Hz], 0.0[s] )  
 trapezoid( 0[%], 0[%], 80[%], 100[%] )  
 zerofill( 1 )  
 fft( 1, TRUE, TRUE )  
 machinephase  
 ppm  
 Derived from: KRY-306 pure\_Carbon-1-1.jdf

Filename = KRY-306 pure\_Carbo  
 Author = element  
 Experiment = carbon\_auto.jxp  
 Sample\_Id = KRY-306 pure  
 Solvent = NONE  
 Actual\_Start\_Time = 23-JUL-2022 15:02:  
 Revision\_Time = 9-DEC-2022 16:41:  
 Comment = single pulse decou  
 Data\_Format = 1D COMPLEX  
 Dim\_Size = 26214  
 X\_Domain = Carbon13  
 Dim\_Title = Carbon13  
 Dim\_Units = [ppm]  
 Dimensions = X  
 Spectrometer = DELTA2\_NMR

Field\_Strength = 9.2982153[T] (400[  
 X\_Acq\_Duration = 1.048576[s]  
 X\_Domain = Carbon13  
 X\_Freq = 99.54517646[MHz]  
 X\_Offset = 100[ppm]  
 X\_Points = 32768  
 X\_Prescans = 4  
 X\_Resolution = 0.95367432[Hz]  
 X\_Sweep = 31.25[kHz]  
 X\_Sweep\_Clipped = 25[kHz]  
 Irr\_Domain = Proton  
 Irr\_Freq = 395.88430144[MHz]  
 Irr\_Offset = 5[ppm]  
 Blanking = 5[us]  
 Clipped = TRUE  
 Scans = 200  
 Total\_Scans = 200

Relaxation\_Delay = 2[s]  
 Recvr\_Gain = 50  
 Temp\_Get = 20.3[dc]  
 X\_90\_Width = 9.65[us]  
 X\_Acq\_Time = 1.048576[s]  
 X\_Angle = 30[deg]  
 X\_Atn = 8[db]  
 X\_Pulse = 3.21666667[us]  
 Irr\_Atn\_Dec = 25.059[db]  
 Irr\_Atn\_Dec\_Calc = 25.059[db]  
 Irr\_Atn\_Dec\_Default\_Calc = 25.059[db]  
 Irr\_Atn\_Noise = 25.059[db]  
 Irr\_Dec\_Bandwidth\_Hz = 4.7826087[kHz]  
 Irr\_Dec\_Bandwidth\_Ppm = 12.08082432[ppm]  
 Irr\_Dec\_Freq = 395.88430144[MHz]  
 Irr\_Dec\_Merit\_Factor = 2.2  
 Irr\_Decoupling = TRUE  
 Irr\_Noise = TRUE  
 Irr\_Noise = WALTZ  
 Irr\_Offset\_Default = 5[ppm]

X : parts per Million : Carbon13

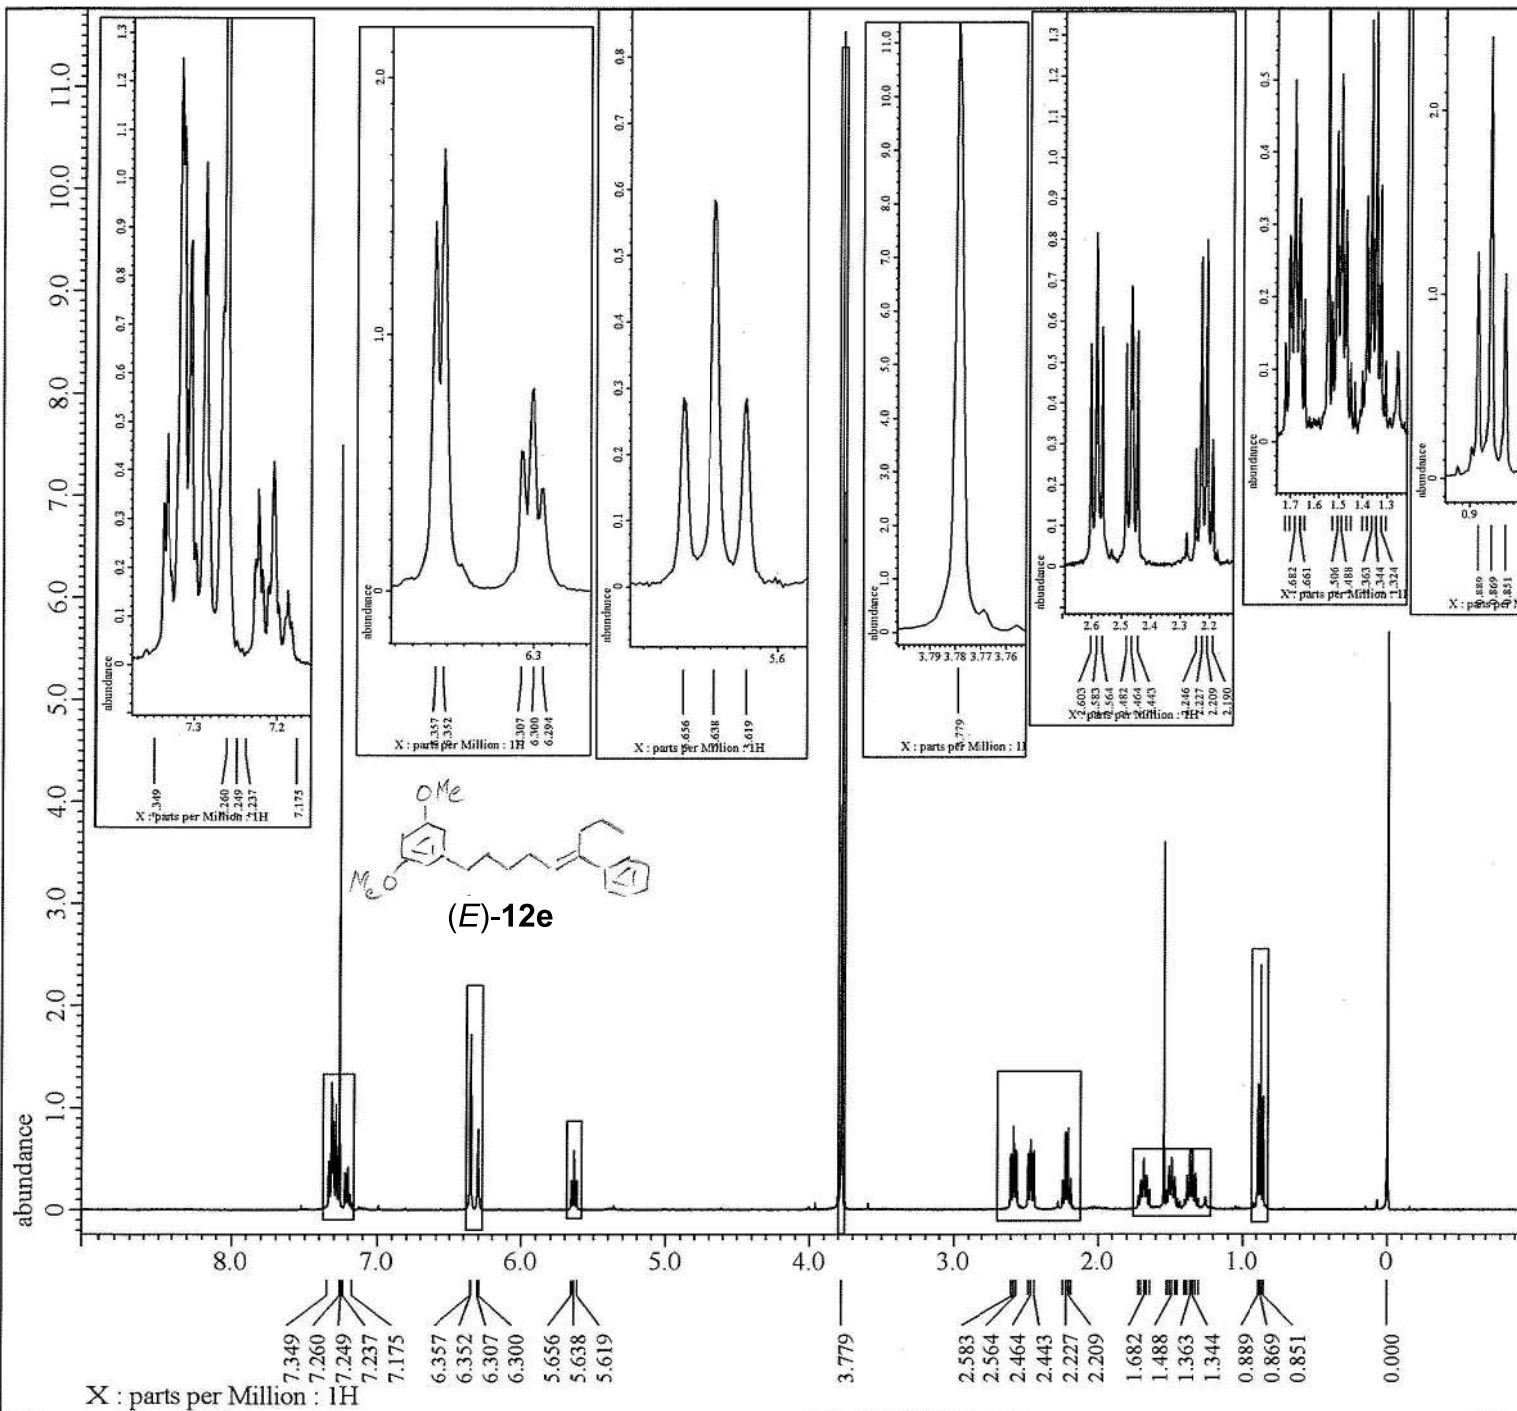

```

---- PROCESSING PARAMETERS ----
dc_balance( 0, FALSE )
sexp( 0.2[Hz], 0.0[s] )
trapezoid3( 0[%], 80[%], 100[%] )
zerofill( 1 )
fft( 1, TRUE, TRUE )
machinephase
ppm

Derived from: KRY-311 pure-1.jdf

Filename      = KRY-311 pure-2.jdf
Author       = element
Experiment   = single_pulse.ex2
Sample Id    = S#626440
Solvent      = CHLOROFORM-D
Actual_Start_Time = 22-JUL-2022 00:09:34
Revision_Time  = 9-DEC-2022 16:28:42

Comment      = single_pulse
Data_Format   = 1D COMPLEX
Dim Size     = 13107
X_Domain     = 1H
Dim Title    = 1H
Dim Units    = [ppm]
Dimensions   = X
Site         = ECS 400
Spectrometer = JNM-ECS400

Field Strength = 9.20197068[T] (390[MHz])
X_Acq Duration = 2.228224[s]
X_Domain       = 1H
X_Freq        = 391.78655441[MHz]
X_Offset      = 5[ppm]
X_Points      = 16384
X_Prescans    = 1
X_Resolution  = 0.44878791[Hz]
X_Sweep       = 7.35294118[kHz]
Irr_Domain    = 1H
Irr_Freq      = 391.78655441[MHz]
Irr_Offset    = 5[ppm]
Tri_Domain    = 1H
Tri_Freq      = 391.78655441[MHz]
Tri_Offset    = 5[ppm]
Clipped       = FALSE
Scans         = 8
Total_Scans   = 8

Relaxation_Delay = 5[s]
Recvr_Gain       = 54
Temp_Get        = 21.2[dc]
X_90_Width     = 10.8[us]
X_Acq Time      = 2.228224[s]
X_Angle        = 45[deg]
X_Atn          = 1.9[db]
X_Pulse        = 5.4[us]
Irr_Mode       = Off
Tri_Mode       = Off
Dante_Presat   = FALSE
Initial_Wait   = 1[s]
Repetition_Time = 7.228224[s]

```

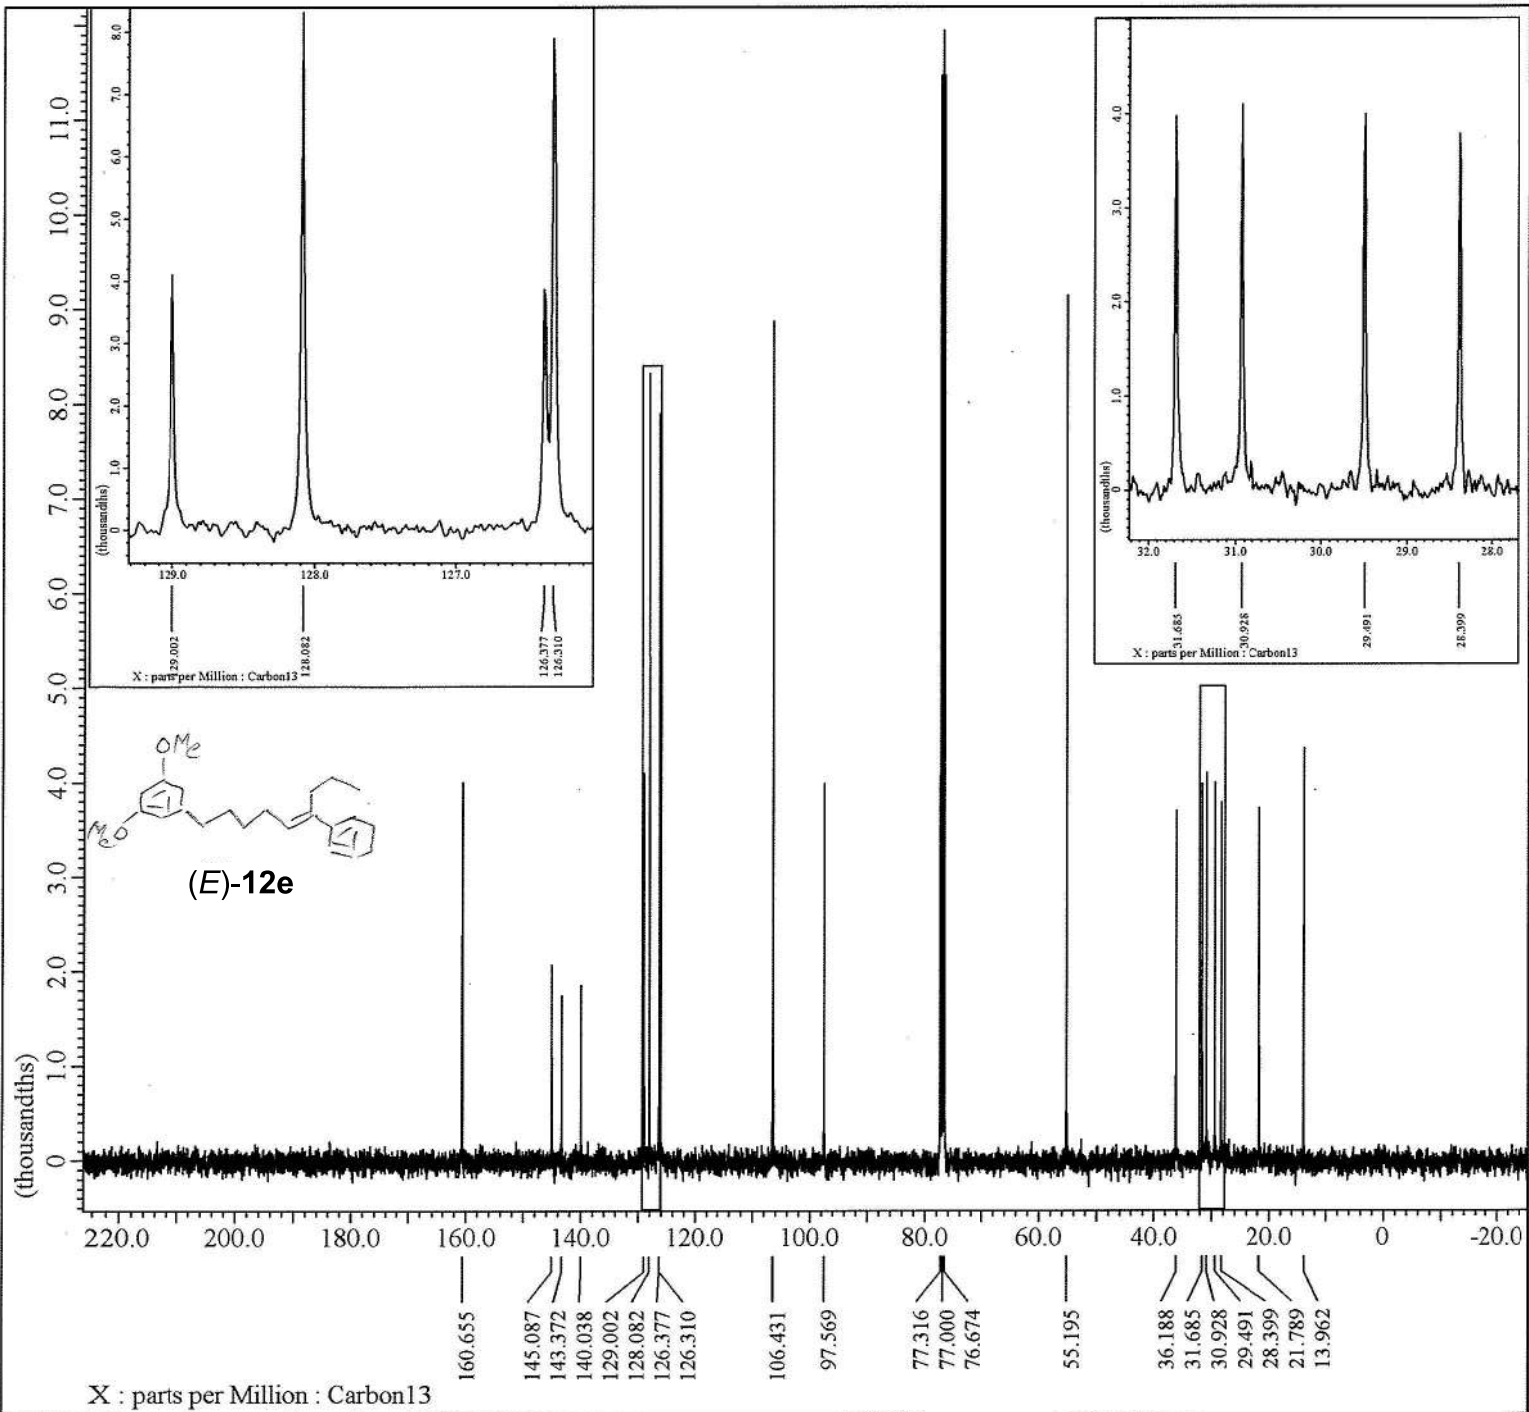

```

---- PROCESSING PARAMETERS ----
sexp( 2.0[Hz], 0.0[s] )
trapezoid( 0[%], 0[%], 80[%], 100[%] )
zerofill( 1 )
fft( 1, TRUE, TRUE )
machinephase
ppm

Derived from: KRY-311 pure_Carbon-1-1.jdf

```

```

Filename      = KRY-311 pure_Carbo
Author        = element
Experiment    = carbon_auto.jxp
Sample_Id     = KRY-311 pure
Solvent       = CHLOROFORM-D
Actual_Start_Time = 21-JUL-2022 20:53:
Revision_Time = 9-DEC-2022 16:29:

```

```

Comment       = single pulse decou
Data Format    = 1D COMPLEX
Dim_Size      = 26214
X_Domain      = Carbon13
Dim_Title     = Carbon13
Dim_Units     = [ppm]
Dimensions    = X
Spectrometer  = DELTA2_NMR

```

```

Field Strength = 9.2982153[T] (400[
X_Acq_Duration = 1.048576[s]
X_Domain       = Carbon13
X_Freq         = 99.54517646[MHz]
X_Offset       = 100[ppm]
X_Points       = 32768
X_Prescans     = 4
X_Resolution   = 0.95367432[Hz]
X_Sweep        = 31.25[kHz]
X_Sweep_Clip   = 25[kHz]
Irr_Domain     = Proton
Irr_Freq       = 395.88430144[MHz]
Irr_Offset     = 5[ppm]
Blanking       = 5[us]
Clipped        = FALSE
Scans          = 200
Total_Scans    = 200

```

```

Relaxation_Delay = 2[s]
Recvr_Gain       = 50
Temp_Get         = 20.5[dc]
X_90_Width      = 9.65[us]
X_Acq_Time      = 1.048576[s]
X_Angle         = 30[deg]
X_Atn           = 8[db]
X_Pulse         = 3.21666667[us]
Irr_Atn_Dec     = 25.059[db]
Irr_Atn_Dec_Calc = 25.059[db]
Irr_Atn_Dec_Default_Calc = 25.059[db]
Irr_Atn_Noise   = 25.059[db]
Irr_Dec_Bandwidth_Hz = 4.7826087[kHz]
Irr_Dec_Bandwidth_Ppm = 12.08082432[ppm]
Irr_Dec_Freq    = 395.88430144[MHz]
Irr_Dec_Merit_Factor = 2.2
Irr_Decoupling  = TRUE
Irr_Noise       = TRUE
Irr_Noise       = WALTZ
Irr_Offset_Default = 5[ppm]

```
